# Supplementary material for: Late Holocene channel pattern change from laterally stable to meandering – a palaeohydrological reconstruction
Source: Copernicus journal article supplement (doi:10.5194/esurf-6-723-2018), 2018-08-31
Supplement: Supplementary file 1 [file esurf-6-723-2018-supplement.zip]

Archive with 3 entries (3 files):
- esurf-6-723-2018-supplement-title-page.pdf
- Example_Calculations_Candeletal..xlsx
- Supplementary information GPR transect.pdf
