# Supplementary material for: Late Holocene channel pattern change from laterally stable to meandering – a palaeohydrological reconstruction
Source: Copernicus journal article supplement (doi:10.5194/esurf-6-723-2018), 2018-08-31
Supplement: Supplementary file 1 [file esurf-6-723-2018-supplement.zip › esurf-6-723-2018-supplement-title-page.pdf]

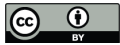

## *Supplement of*

# **Late Holocene channel pattern change from laterally stable to meandering – a palaeohydrological reconstruction**

**Jasper H. J. Candel et al.**

*Correspondence to:* Jasper H. J. Candel ([jasper.candel@wur.nl](mailto:jasper.candel@wur.nl))

- [esurf-6-723-2018-supplement-title-page.pdf](#)
- [Example\\_Calculations\\_Candeletal.xlsx](#)
- [Supplementary information GPR transect.pdf](#)

The copyright of individual parts of the supplement might differ from the CC BY 4.0 License.
