# Supplementary material for: Late Holocene channel pattern change from laterally stable to meandering – a palaeohydrological reconstruction
Source: Copernicus journal article supplement (doi:10.5194/esurf-6-723-2018), 2018-08-31
Supplement: Supplementary file 1 [file esurf-6-723-2018-supplement.zip › Example_Calculations_Candeletal..xlsx]

## Sheet: Example from data Candel et al.
	Scroll_1_Junnerkoeland				Scroll_2_Junnerkoeland				Scroll_3_Junnerkoeland				Scroll_4_Junnerkoeland				Scroll_5_Junnerkoeland				Scroll_6_Junnerkoeland
	Average	Standard deviation			Average	Standard deviation			Average	Standard deviation			Average	Standard deviation			Average	Standard deviation			Average	Standard deviation
Age (AD)	1513	-			1585	-			1628	-			1674	-			1709	-			1771	-
Distance from meander base (m)	189	-			334	-			599	-			879	-			888	-			957	-
Radius of curvature R_curv(m)	225	-			183	-			198	-			135	-			130	-			95	-
Scroll bar surface area SB_surf (m^2)	70240	-			57608	-			33310	-			23939	-			17435	-			23909	-
Porosity φ (-)	0.325	0.025			0.325	0.025			0.325	0.025			0.325	0.025			0.325	0.025			0.325	0.025
Median bed diameter D_50 (m)	0.00028	5e-05			0.00028	5e-05			0.00028	5e-05			0.00028	5e-05			0.00028	5e-05			0.00028	5e-05
16th percentile sediment grain size D_16 (m)	0.00018	5e-05			0.00018	5e-05			0.00018	5e-05			0.00018	5e-05			0.00018	5e-05			0.00018	5e-05
84th percentile sediment grain size D_84 (m)	0.00045	5e-05			0.00045	5e-05			0.00045	5e-05			0.00045	5e-05			0.00045	5e-05			0.00045	5e-05
Transverse bed slope α (°)	3.27	1.28			3.27	1.28			3.27	1.28			3.27	1.28			3.27	1.28			3.27	1.28
Valley slope S_v (-)	0.000156	1.9799e-05			0.000156	1.9799e-05			0.000156	1.9799e-05			0.000156	1.9799e-05			0.000156	1.9799e-05			0.000156	1.9799e-05
Sinuosity s (-)	1.51	-			1.57	-			1.63	-			1.68	-			1.74	-			1.82	-
Bankfull water depth H_bf (m)	3.68	0.368			3.24	0.324			3.1	0.31			2.8	0.28			2.85	0.285			3.8	0.38
Density of sediment ρ_s (kg m^-3)	2650	-			2650	-			2650	-			2650	-			2650	-			2650	-
Density of water ρ (kg m^-3)	1000	-			1000	-			1000	-			1000	-			1000	-			1000	-
Degree of nonlinearity of sediment transport vs depth-av flow velocity n (-)	4	-			4	-			4	-			4	-			4	-			4	-
Intermittency I (-)	0.05	0.02			0.05	0.02			0.05	0.02			0.05	0.02			0.05	0.02			0.05	0.02
ɛ ((s m^-1)^0.5)	4.7	-			4.7	-			4.7	-			4.7	-			4.7	-			4.7	-
	Median	Average	16th percentile	84th percentile	Median	Average	16th percentile	84th percentile	Median	Average	16th percentile	84th percentile	Median	Average	16th percentile	84th percentile	Median	Average	16th percentile	84th percentile	Median	Average	16th percentile	84th percentile
Bankfull width W (m)	96.7902	149.189	68.4912	160.176	85.1645	127.254	59.7287	141.257	82.5221	121.153	57.4297	135.18	73.683	107.106	51.8072	119.954	74.773	110.98	52.9827	123.596	99.3312	154.308	70.4777	163.868
Mean water depth H_gem (m)	2.1447	2.14539	1.93397	2.35824	1.8874	1.88966	1.70054	2.07763	1.8079	1.80612	1.62466	1.98362	1.63183	1.6325	1.47319	1.79056	1.66562	1.66383	1.49995	1.82733	2.2175	2.21785	2.00132	2.43288
Cross-sectional area A (m^2)	209.015	322.273	142.054	354.606	162.466	243.601	108.586	275.67	149.378	221.857	99.6621	252.051	120.827	176.351	81.1576	201.994	125.302	186.676	84.7208	211.98	221.691	345.895	149.656	374.383
Channel slope S_c (-)	0.000103334	0.000103386	9.03806e-05	0.000116657	9.93897e-05	9.93005e-05	8.67116e-05	0.000112062	9.55743e-05	9.55237e-05	8.34371e-05	0.000107439	9.29315e-05	9.28404e-05	8.0933e-05	0.00010472	8.9649e-05	8.97001e-05	7.83872e-05	0.000101055	8.57916e-05	8.58129e-05	7.49212e-05	9.67298e-05
Wetted perimeter P (m)	97.3383	149.706	69.1807	160.517	85.5853	127.71	60.2998	141.565	82.9612	121.587	58.0006	135.456	74.1066	107.501	52.3643	120.18	75.1558	111.382	53.4909	123.843	99.891	154.845	71.1526	164.197
Hydraulic radius R (m)	2.13182	2.13236	1.92286	2.34384	1.87556	1.87811	1.69093	2.06384	1.79701	1.79515	1.61447	1.9728	1.62156	1.62251	1.46255	1.78046	1.65562	1.65368	1.49086	1.81715	2.20473	2.20421	1.98938	2.4184
Volumetric rate of scroll bar growth SB_vol (m^3 yr^-1)	2420.92	2423.23	2168.49	2681.62	2917.93	2929.71	2617.93	3242.67	1511.49	1512.39	1351.98	1670.62	1290.74	1292.82	1158.23	1428.63	540.859	541.263	484.414	597.669	#REF!	#REF!	#REF!	#REF!
Chezy coefficient C (m^0.5 s^-1)	46.9606	46.8326	45.444	48.2834	47.0278	46.8805	45.5113	48.3043	47.1622	47.0226	45.6643	48.4863	47.1628	47.0384	45.7101	48.4563	47.399	47.2645	45.9143	48.7068	48.0066	47.8823	46.4886	49.3402
Bankfull discharge Q_bf (m^3 yr^-1)	145.685	226.052	94.8363	254.433	103.926	157.996	66.5821	180.561	92.2823	138.043	58.8945	159.723	70.1993	102.826	44.816	120.154	72.308	108.562	46.6517	125.209	147.158	230.242	94.7648	252.266
Sorting σ (-)	1.6229	1.73719	1.41665	1.9407	1.62048	1.7559	1.41135	1.93672	1.62353	1.73726	1.41318	1.93397	1.62064	1.72438	1.41559	1.93107	1.61983	1.71391	1.4116	1.92178	1.62191	1.715	1.41115	1.93404
Cross-sectional averaged flow velocity u_bf (m s^-1)	0.69342	0.692461	0.638085	0.746194	0.637806	0.637565	0.588127	0.688114	0.613215	0.613185	0.566222	0.660819	0.575149	0.574953	0.530591	0.619718	0.573396	0.573314	0.528883	0.618026	0.65599	0.655859	0.605207	0.706879
Yearly sediment transport Q_sbf (m^3 yr^-1)	7740.24	12967.6	4044.52	15788.7	4469.56	7387.57	2361.52	9189	3538.41	5709.95	1857.26	7139.86	2307.52	3615.66	1199.16	4669.27	2263.37	3667.12	1179.06	4583.24	5681.62	9689.94	2999.61	11325.7
Potential specific stream power ω_pv (W m^-2)	3.94923	4.39003	2.98814	5.40372	3.31183	3.68648	2.52245	4.53408	3.12254	3.44731	2.37374	4.23722	2.72607	3.00775	2.06482	3.72918	2.76855	3.06817	2.11402	3.7754	3.96596	4.41585	3.01017	5.37942
Adaptation length of flow λ_w (m)	239.947	240.269	210.923	269.923	211.731	212.06	185.716	238.27	203.687	203.907	178.964	229.049	184.165	184.43	161.813	206.945	189.871	189.787	166.654	212.941	259.242	259.594	228.14	291.048
Adaptation length of bed disturbance λ_s (m)	186.233	2308.84	95.3649	510.258	158.13	1679.37	79.038	431.98	149.777	1498.88	74.3047	399.933	128.012	1180.72	65.0518	338.772	128.013	1336.06	65.2543	349.49	175.171	2227.76	89.9458	477.981
Magnitude of transverse slope effect f(θ) (-)	0.424872	0.425459	0.393067	0.457735	0.405595	0.406121	0.375792	0.437258	0.395006	0.395048	0.365423	0.424402	0.381752	0.381803	0.352561	0.410909	0.376075	0.37666	0.347939	0.404909	0.389799	0.390117	0.361022	0.41898
Dimensionless shear stress θ (-)	0.475346	0.494759	0.375231	0.61201	0.400813	0.416403	0.316624	0.514145	0.370021	0.384509	0.291594	0.473325	0.32567	0.33826	0.257111	0.418993	0.320484	0.332797	0.252969	0.40931	0.40821	0.423735	0.323386	0.521526
Shear stress τ (Pa)	2.15488	2.16237	1.81015	2.50189	1.81724	1.82937	1.53506	2.12234	1.66999	1.68188	1.41062	1.95071	1.46812	1.47753	1.241	1.7128	1.44679	1.45508	1.22174	1.68539	1.84315	1.85557	1.56182	2.1504
Interaction parameter IP (-)	0.778842	9.59422	0.403039	2.11535	0.744388	7.77192	0.382892	2.0132	0.735301	7.20828	0.371865	1.95516	0.696383	6.41011	0.359199	1.8131	0.673596	6.95499	0.350734	1.8356	0.678721	8.72798	0.352931	1.84037

## Sheet: Monte_Carlo_Scroll1
	Porosity φ (-)	Median bed diameter D_50 (m)	16th percentile sediment grain size D_16 (m)	84th percentile sediment grain size D_84 (m)	Transverse bed slope α (°)	Valley slope S_v (-)	Bankfull water depth H_bf (m)	Intermittency I (-)	Bankfull width W (m)	Mean water depth H_gem (m)	Cross-sectional area A (m^2)	Channel slope S_c (-)	Wetted perimeter P (m)	Hydraulic radius R (m)	Volumetric rate of scroll bar growth SB_vol (m^3 yr^-1)	Chezy coefficient C (m^0.5 s^-1)	Bankfull discharge Q_bf (m^3 yr^-1)	Sorting σ (-)	Cross-sectional averaged flow velocity u_bf (m s^-1)	Yearly sediment transport Q_sbf (m^3 yr^-1)	Potential specific stream power ω_pv (W m^-2)	Adaptation length of flow λ_w (m)	Adaptation length of bed disturbance λ_s (m)	Magnitude of transverse slope effect f(θ) (-)	Dimensionless shear stress θ (-)	Shear stress τ (Pa)	Interaction parameter IP (-)
Median	0.324596	0.00027987	0.000179532	0.000450415	3.2606	0.000156113	3.67782	0.0501851	96.7902	2.1447	209.015	0.000103334	97.3383	2.13182	2420.92	46.9606	145.685	1.6229	0.69342	7740.24	3.94923	239.947	186.233	0.424872	0.475346	2.15488	0.778842
Average	0.324596	0.00027987	0.000179532	0.000450415	3.2606	0.000156113	3.67782	0.0501851	149.189	2.14539	322.273	0.000103386	149.706	2.13236	2423.23	46.8326	226.052	1.73719	0.692461	12967.6	4.39003	240.269	2308.84	0.425459	0.494759	2.16237	9.59422
sd	0.024995	5.04896e-05	5.04311e-05	5.03589e-05	1.26778	1.99557e-05	0.366281	0.0199362	303.557	0.213664	657.921	1.32157e-05	303.47	0.212546	256.962	1.6289	467.888	2.12984	0.054728	29883.6	2.31175	30.115	18882.4	0.0329659	0.129836	0.349358	78.3894
Q_16	0.299854	0.000228815	0.000129012	0.000400605	1.99463	0.000136475	3.31537	0.0303434	68.4912	1.93397	142.054	9.03806e-05	69.1807	1.92286	2168.49	45.444	94.8363	1.41665	0.638085	4044.52	2.98814	210.923	95.3649	0.393067	0.375231	1.81015	0.403039
Q_84	0.34955	0.000330207	0.000229249	0.000499941	4.53501	0.000176152	4.0427	0.0700432	160.176	2.35824	354.606	0.000116657	160.517	2.34384	2681.62	48.2834	254.433	1.9407	0.746194	15788.7	5.40372	269.923	510.258	0.457735	0.61201	2.50189	2.11535
	0.306645	0.000253036	0.000149984	0.000495978	0.600067	0.000139858	3.62353	0.0811831	518.955	2.11372	1096.93	9.26214e-05	519.049	2.11334	2450.97	47.048	722.036	1.8236	0.658235	32472.6	7.84402	238.469	5297.86	0.410383	0.468829	1.92021	22.2162
	0.36292	0.000213978	0.000215852	0.0004571	1.85655	0.000152442	4.34564	0.0188882	201.099	2.53496	509.776	0.000100955	201.45	2.53054	2700.84	48.1721	392.506	1.56376	0.769958	33039.5	6.30377	299.822	742.086	0.459099	0.723583	2.50617	2.47509
	0.325857	0.000296114	0.000128771	0.000443921	4.80011	0.000143361	3.73787	0.0401381	66.7681	2.18042	145.583	9.49413e-05	67.5357	2.15564	2458.26	45.9083	95.6129	1.89935	0.656761	3908.04	2.92591	234.22	83.4563	0.402867	0.418878	2.00771	0.356315
	0.358219	0.000231372	0.000191904	0.000402543	3.94702	0.000156494	3.98568	0.0521704	86.6481	2.32498	201.455	0.000103639	87.3254	2.30695	2495.41	47.9662	149.415	1.47274	0.741678	10979.3	3.9927	272.641	146.822	0.448738	0.626275	2.34547	0.538518
	0.331635	0.000303249	0.00020142	0.000513295	2.58919	0.000169837	3.01118	0.0486718	99.8829	1.75652	175.446	0.000112475	100.221	1.75059	1963.37	46.3735	114.166	1.5991	0.650715	5334.13	3.78767	192.528	241.487	0.419629	0.393512	1.93157	1.25429
	0.36199	0.000204126	0.00016943	0.000448856	4.26841	0.000174792	3.46129	0.0241358	69.5634	2.01908	140.454	0.000115756	70.1981	2.00083	2154.35	46.2093	98.7741	1.70185	0.703246	8614.81	3.62589	219.743	114.726	0.472446	0.68766	2.27209	0.52209
	0.349381	0.000285558	0.000244909	0.000454866	4.62792	0.000139275	4.03553	0.043426	74.7795	2.35406	176.036	9.22354e-05	75.5797	2.32914	2561.41	48.6815	125.606	1.37944	0.713528	5969.87	3.258	284.346	97.7938	0.406315	0.455948	2.10747	0.343925
	0.322832	0.000284147	0.000214591	0.000489217	2.70527	0.000157271	3.63372	0.0842189	115.354	2.11967	244.512	0.000104153	115.78	2.11187	2400.49	47.4722	172.151	1.52292	0.704059	8969.35	4.307	243.471	270.132	0.424699	0.469151	2.15779	1.1095
	0.298943	0.000228394	0.000194208	0.000480867	3.66825	0.00014168	3.05122	0.0631518	71.3895	1.77988	127.065	9.38275e-05	71.8722	1.76792	2086.79	47.3673	77.5176	1.64073	0.610065	3280.04	2.60363	203.54	117.794	0.406016	0.440174	1.62728	0.578725
	0.36758	0.000365312	0.000135816	0.000414118	2.84633	0.00011429	3.6225	0.0581341	109.29	2.11312	230.942	7.56885e-05	109.736	2.10452	2234.94	47.0591	137.164	1.91168	0.59393	3103.82	2.79381	238.514	197.022	0.344019	0.264262	1.56262	0.82604
	0.323219	0.000183096	0.000217446	0.000453649	4.20758	0.000151542	4.12064	0.0512357	84.0166	2.40371	201.951	0.000100359	84.7617	2.38258	2720.6	47.5392	148.457	1.65984	0.735112	12534.1	3.85394	276.877	138.532	0.465588	0.791481	2.3457	0.500339
	0.29552	0.000247326	0.000177735	0.000424993	3.42222	0.000137586	3.50435	0.0447113	87.9017	2.04421	179.689	9.11165e-05	88.4197	2.03223	2408.4	48.0582	117.51	1.55495	0.653962	5029.91	3.11302	240.636	155.112	0.405018	0.45375	1.81652	0.644591
	0.288463	0.00025018	0.000165676	0.000454426	2.15176	0.000150566	3.66919	0.0740049	146.482	2.14036	313.524	9.97126e-05	146.825	2.13536	2546.94	47.2857	216.327	1.66322	0.689985	11261.3	4.62225	243.919	434.108	0.42738	0.515804	2.08877	1.77972
	0.29094	0.000334901	0.000237683	0.000397121	1.75282	0.000166626	3.88602	0.0586741	190.479	2.26685	431.787	0.000110348	190.775	2.26333	2688.07	48.3669	330.046	1.2974	0.764372	17114.6	6.31831	270.284	696.015	0.429187	0.451973	2.45009	2.57512
	0.357953	0.000296412	0.000170631	0.000459391	3.23614	0.000159476	4.06553	0.0901603	107.855	2.37156	255.785	0.000105613	108.424	2.35911	2546.45	46.8417	189.122	1.6435	0.739378	11273.4	4.57759	265.216	215.374	0.433356	0.509434	2.4442	0.812071
	0.338201	0.00026498	0.000271318	0.000414243	1.49769	0.000155992	3.51245	0.0669073	201.513	2.04893	412.886	0.000103306	201.742	2.0466	2267.71	49.101	294.782	1.26997	0.713955	16660.5	5.59017	251.773	856.564	0.42656	0.483574	2.0741	3.40212
	0.327805	0.000310536	0.000169405	0.000421412	4.12255	0.000177481	4.45281	0.030779	92.6684	2.59747	240.704	0.000117537	93.4578	2.57554	2919.99	46.4158	194.388	1.59507	0.807583	14109.3	5.16486	285.223	154.258	0.460505	0.590809	2.96969	0.540833
	0.273808	0.000266097	0.000211575	0.000498874	5.08669	0.000143371	2.92852	0.0459372	49.3497	1.70831	84.3044	9.49476e-05	49.9856	1.68657	2074.69	47.097	50.2444	1.56624	0.595989	1700.76	2.12117	193.132	56.581	0.391713	0.364724	1.57094	0.292966
	0.359984	0.000244928	0.00019118	0.000523782	3.75623	0.000182754	3.53592	0.0614625	80.7869	2.06262	166.632	0.000121029	81.3593	2.0481	2207.72	45.8275	120.228	1.70983	0.721519	9687.49	4.18255	220.787	150.124	0.468261	0.613366	2.43171	0.679952
	0.319658	0.000211324	0.000181135	0.000523203	1.97096	0.000193629	4.04278	0.0340897	176.216	2.35829	415.567	0.000128231	176.562	2.35366	2683.24	45.6829	329.81	1.82125	0.793638	37450.9	7.33963	250.845	682.012	0.511211	0.865575	2.96079	2.71886
	0.298531	0.000356184	0.00014816	0.000387641	4.13534	0.00016399	3.59318	0.0371211	74.5464	2.09602	156.251	0.000108603	75.1853	2.07821	2458.9	45.6799	107.229	1.74618	0.686263	4408.21	3.54442	222.92	110.833	0.412584	0.384036	2.21411	0.497188
	0.320348	0.000346992	0.000203554	0.000475879	2.25165	0.00017202	4.36936	0.0404245	166.689	2.54879	424.856	0.000113921	167.116	2.54228	2897.05	46.9597	339.531	1.53806	0.799167	20585.2	6.61591	286.474	489.359	0.443046	0.50585	2.84115	1.70821
	0.334484	0.000274966	0.000113592	0.000517863	2.43134	0.000157081	3.22079	0.0327735	113.781	1.8788	213.771	0.000104027	114.121	1.8732	2091.09	44.8331	133.787	2.15201	0.625841	6129.11	3.79229	192.477	291.277	0.417202	0.429505	1.91161	1.51331
	0.299877	0.000279242	0.000244282	0.000410517	4.66604	0.000132271	3.4905	0.0502464	64.1492	2.03612	130.616	8.75965e-05	64.8468	2.01422	2384.04	49.206	85.371	1.30661	0.653605	3039.47	2.55088	251.27	79.1114	0.386331	0.382938	1.73086	0.314846
	0.322593	0.000266541	0.000129354	0.000529734	5.14082	0.000154516	3.70694	0.0730459	61.8058	2.16238	133.648	0.000102328	62.6189	2.1343	2449.72	45.1154	89.1072	2.024	0.666732	4544	3.0444	224.328	76.2643	0.426083	0.496598	2.1425	0.339968
	0.319557	0.000264579	0.000216964	0.000447191	4.28938	0.000153304	3.20872	0.0539403	64.1711	1.87176	120.113	0.000101526	64.7622	1.85467	2129.98	47.6152	78.4796	1.45483	0.653384	3637.79	2.83468	216.293	92.2289	0.413749	0.431326	1.8472	0.426408
	0.355843	0.000287964	0.000139202	0.000367691	3.33222	0.000120492	3.80247	0.0180436	97.9616	2.21811	217.289	7.97961e-05	98.5091	2.20578	2389.51	48.1211	138.722	1.67277	0.638421	4650.47	2.96212	261.791	163.847	0.373775	0.370443	1.72668	0.625871
	0.305183	0.00032225	0.000170419	0.000460229	2.5179	0.000148487	3.20803	0.0559789	109.429	1.87135	204.78	9.83355e-05	109.78	1.86537	2174.5	46.805	129.813	1.65955	0.633915	4514.26	3.53116	208.949	254.545	0.392603	0.344985	1.79947	1.21821
	0.305564	0.000304419	0.000140789	0.000404366	4.0471	0.000162302	3.93372	0.063297	83.397	2.29467	191.369	0.000107485	84.0819	2.27598	2664.94	46.0828	137.932	1.74528	0.720768	7255.21	3.97857	248.37	132.473	0.431367	0.487033	2.39985	0.533371
	0.34165	0.000248707	0.000179759	0.000459136	3.36875	0.000176485	3.62962	0.0327132	92.4923	2.11728	195.832	0.000116878	93.0206	2.10526	2331.15	46.5101	142.873	1.61483	0.729567	10737.1	4.40306	233.439	188.921	0.461475	0.599605	2.41382	0.809297
	0.307344	0.00022434	0.000124429	0.00039967	3.60087	0.000152194	3.41847	0.0741621	81.4826	1.99411	162.485	0.00010079	82.0137	1.98119	2309.94	46.5184	106.81	1.79224	0.657351	5915.58	3.28302	219.937	145.764	0.432084	0.539456	1.95891	0.662754
	0.291048	0.000348164	4.19108e-05	0.000503804	1.32778	0.000164566	3.57646	0.0849851	231.454	2.08627	482.874	0.000108984	231.661	2.0844	2473.56	39.0466	284.178	4.87715	0.588513	10288.1	5.79039	162.12	1083.34	0.416395	0.395438	2.22851	6.68233
	0.327829	0.000248426	0.00014332	0.000356041	2.22663	0.00017075	4.09635	0.0809917	158.032	2.38954	377.623	0.000113079	158.428	2.38356	2686.14	47.1502	292.312	1.58328	0.774085	23216.7	6.09333	270.759	493.342	0.465878	0.65755	2.6441	1.82207
	0.300925	0.000314104	0.000196942	0.00046095	2.57393	0.000128044	3.29621	0.0399949	109.987	1.92279	211.481	8.47976e-05	110.355	1.91638	2247.97	48.2688	130.128	1.53121	0.615316	3634.77	3.04871	228.331	234.848	0.368416	0.31355	1.59416	1.02854
	0.372362	0.000162329	0.000128136	0.000473956	3.45476	0.000161791	4.41761	0.0152907	109.763	2.57694	282.853	0.000107146	110.422	2.56156	2704.89	45.8537	214.87	2.09328	0.759652	26154.3	4.95009	276.155	237.049	0.500415	1.02471	2.69247	0.858391
	0.352745	0.000263658	0.000150072	0.000486862	1.33777	0.000148736	3.91615	0.074002	251.543	2.28442	574.63	9.85006e-05	251.771	2.28235	2472.79	46.8321	403.499	1.80172	0.702189	22666.1	6.23603	255.367	1195.96	0.426157	0.516769	2.20541	4.68332
	0.328875	0.00023182	0.00014106	0.000528079	3.52683	0.000143198	3.77989	0.0473095	91.994	2.20493	202.841	9.48331e-05	92.5694	2.19123	2474.77	46.2675	135.287	1.9607	0.66696	7289.84	3.47644	240.574	165.234	0.424889	0.543267	2.03853	0.686832
	0.313191	0.000221472	9.4819e-05	0.000413317	2.57474	0.000133299	3.64492	0.0698198	121.584	2.1262	258.512	8.82772e-05	121.991	2.11911	2442.17	46.2734	163.611	2.10098	0.632895	7579.28	3.55879	232.043	289.736	0.411297	0.511915	1.83515	1.24863
	0.338973	0.000303312	0.000201364	0.000360638	3.13898	0.000137106	3.79213	0.0600638	103.722	2.21207	229.442	9.07986e-05	104.237	2.20115	2445.42	49.0624	159.142	1.34764	0.693607	6506.16	3.61011	271.393	194.399	0.3945	0.399351	1.96064	0.716298
	0.299206	0.000254896	0.000185332	0.000480587	3.81387	0.000114168	3.92725	0.0739671	88.3679	2.29089	202.441	7.56081e-05	89.0132	2.27428	2684.92	48.7432	129.396	1.63039	0.639176	4216.43	2.71067	277.417	129.484	0.374915	0.408853	1.68687	0.466749
	0.332807	0.000307093	0.000205473	0.000386542	1.66538	0.000166972	4.20334	0.0284357	216.857	2.45195	531.722	0.000110577	217.162	2.44851	2735.89	48.1352	421.145	1.37664	0.792039	27367.7	7.15204	289.56	863.005	0.444096	0.534336	2.65605	2.9804
	0.328274	0.000192758	0.000133498	0.000470008	4.35545	0.000147172	3.43833	0.0566959	67.7159	2.00569	135.817	9.74649e-05	68.3587	1.98683	2253.16	46.1687	87.2582	1.94112	0.642468	5381.99	2.86945	217.901	101.424	0.437848	0.608851	1.89967	0.465458
	0.300218	0.000313214	0.00010854	0.000425269	2.48017	0.000132006	4.13712	0.066185	143.271	2.41332	345.76	8.7421e-05	143.717	2.40585	2824.32	45.9679	230.5	2.12173	0.666648	8198.15	4.18311	259.912	337.593	0.391732	0.406966	2.06325	1.29888
	0.340922	0.000239223	0.000121074	0.000481004	2.41376	0.000164847	3.83031	0.0572644	136.3	2.23435	304.543	0.00010917	136.702	2.22779	2462.77	45.5579	216.372	1.99327	0.710482	15313.4	5.06119	236.363	383.29	0.454971	0.616158	2.38587	1.62161
	0.3317	0.000223457	9.20506e-05	0.000486605	5.7433	0.000145024	4.42396	0.0473516	65.979	2.58065	170.268	9.60423e-05	67.0574	2.53914	2884.26	44.8169	119.166	2.30258	0.699869	7625.01	3.30435	264.188	75.5965	0.442301	0.661412	2.39232	0.286146
	0.310197	0.000280194	0.000229889	0.000353196	2.56066	0.000171525	4.49956	0.0486701	150.919	2.62474	396.122	0.000113593	151.418	2.61608	3027.94	48.9362	334.164	1.23968	0.843589	26336.8	6.54453	320.368	408.208	0.464283	0.642773	2.91521	1.27419
	0.322117	0.000283369	0.00014868	0.000450448	2.35903	0.000179259	2.9905	0.0584825	108.887	1.74446	189.949	0.000118714	109.194	1.73956	1977.65	45.5496	124.335	1.74776	0.65457	6668.69	4.17204	184.472	300.607	0.43652	0.44168	2.02587	1.62955
	0.339534	0.000282774	0.000134606	0.000436857	3.82692	0.000158253	3.26162	0.0545516	73.1396	1.90261	139.156	0.000104804	73.6774	1.88873	2101.53	45.7804	89.6304	1.82282	0.644098	4186.27	3.12717	203.241	118.668	0.416563	0.424251	1.94184	0.583881
	0.323686	0.000296771	0.000114337	0.000489943	2.33003	0.000121053	4.0582	0.0707107	149.605	2.36728	354.158	8.01677e-05	150.016	2.3608	2677.53	46.472	226.421	2.12324	0.639323	7339.2	3.80195	260.575	361.922	0.377808	0.386504	1.85664	1.38894
	0.281201	0.000245589	0.000199055	0.000488149	3.97095	0.000146518	3.89386	0.0548127	84.1401	2.27142	191.117	9.7032e-05	84.8056	2.25359	2730.48	47.5105	134.272	1.61072	0.702562	7038.54	3.54368	261.323	134.857	0.427036	0.539632	2.14516	0.516056
	0.322167	0.000324911	0.000255538	0.00051117	3.12828	0.000156601	3.92491	0.0604904	107.722	2.28953	246.633	0.000103709	108.253	2.2783	2595.4	47.8785	181.512	1.42237	0.73596	8902.48	4.40371	267.503	215.032	0.418733	0.440737	2.31791	0.803849
	0.312027	0.000210213	0.000210913	0.000463901	5.11647	0.000150973	3.50863	0.0408844	58.7792	2.0467	120.303	9.99823e-05	59.5453	2.02037	2354.84	47.2185	80.7358	1.60175	0.671102	4862.28	2.83142	232.584	74.7175	0.436846	0.582383	1.98163	0.32125
	0.302637	0.000196502	0.000117714	0.000315986	3.62803	0.000146779	3.8134	0.0457326	90.2141	2.22448	200.68	9.72045e-05	90.811	2.20986	2594.32	47.7115	140.331	1.63868	0.699277	9377.08	3.6292	258.094	165.084	0.445333	0.662524	2.10727	0.639628
	0.319391	0.000270153	0.00019799	0.000497821	4.39075	0.000175443	3.73364	0.0802554	72.9383	2.17795	158.856	0.000116187	73.6418	2.15715	2479.03	46.3328	116.523	1.60361	0.733513	7835.43	3.95288	238.302	112.421	0.454238	0.562269	2.45871	0.471757
	0.345988	0.000246352	0.000108966	0.000432332	3.42271	0.000168501	4.19696	0.0678508	105.26	2.44823	257.699	0.00011159	105.88	2.43388	2677.77	45.3382	192.548	2.00787	0.747181	15104.2	4.88025	256.496	213.239	0.465046	0.668164	2.66436	0.831355
	0.302861	0.000320223	0.000136673	0.000428229	5.12681	0.000126684	3.97346	0.0130989	66.4315	2.31785	153.978	8.38967e-05	67.3007	2.28791	2702.34	46.6834	99.5895	1.84013	0.646776	3062.86	2.63876	257.46	72.751	0.377117	0.363285	1.88301	0.282571
	0.278077	0.000266352	5.41943e-05	0.000479006	2.03019	0.000179845	3.17344	0.0829747	134.284	1.85117	248.583	0.000119103	134.564	1.84732	2234.97	41.1792	151.838	3.35657	0.610814	7867.44	4.62551	159.994	442.295	0.448133	0.500637	2.1584	2.76445
	0.314292	0.000345658	0.000192042	0.000486954	2.75891	0.000129312	4.07512	0.0490065	126.847	2.37715	301.535	8.56369e-05	127.334	2.36806	2726.04	47.9935	206.085	1.60434	0.683453	6679.33	3.87465	279.076	259.828	0.378861	0.355568	1.9894	0.931027
	0.300604	0.000375995	7.765e-05	0.000420323	4.07392	0.000139416	3.70631	0.0395044	78.0568	2.16201	168.76	9.23282e-05	78.7063	2.14417	2528.81	42.6704	101.319	2.98004	0.600377	2757.32	2.92907	200.638	108.135	0.378707	0.319101	1.94206	0.538958
	0.334926	0.000303589	9.53006e-05	0.00037364	3.35464	0.000154345	3.37896	0.0234111	86.4678	1.97106	170.433	0.000102215	86.9576	1.95996	2192.32	44.5469	107.461	2.20817	0.63052	4466.65	3.33957	199.359	157.117	0.408804	0.399938	1.96531	0.788114
	0.307121	0.00023869	0.000218722	0.000529431	2.16903	0.00015504	2.94004	0.0156927	116.438	1.71502	199.694	0.000102676	116.715	1.71095	1987.3	46.9308	124.215	1.65468	0.622029	5868.47	3.60665	192.525	335.447	0.418799	0.446055	1.72336	1.74236
	0.34659	0.000248286	0.000291917	0.000423915	3.77111	0.000142676	4.13216	0.0799348	94.0361	2.41043	226.667	9.44873e-05	94.7077	2.39333	2634	49.5572	168.921	1.27895	0.745239	10128.7	3.87047	301.723	158.222	0.425667	0.552001	2.21843	0.524393
	0.304729	0.000274668	0.000212626	0.000448193	3.56811	0.000156942	3.16313	0.0225181	76.0905	1.84516	140.399	0.000103935	76.5776	1.83342	2145.47	47.5198	92.0981	1.46178	0.655974	4172.71	3.14365	212.366	131.907	0.414897	0.420466	1.86936	0.621132
	0.357315	0.000319192	0.000117238	0.000517978	1.59064	0.000139129	3.54737	0.0402784	191.619	2.0693	396.516	9.21386e-05	191.864	2.06665	2224.12	45.3835	248.321	2.17268	0.626257	8906.29	4.57611	217.23	699.116	0.388864	0.361554	1.868	3.21832
	0.303745	0.000246634	0.000209815	0.0004014	1.08336	0.000179815	4.71112	0.0502081	373.691	2.74816	1026.96	0.000119083	373.913	2.74652	3199.96	48.1051	893.43	1.4015	0.869975	90134.8	11.2183	324.135	2537.33	0.492825	0.8037	3.20848	7.828
	0.292429	0.000382824	0.000130497	0.000454986	3.79961	0.000141681	3.72324	0.0369807	84.0929	2.17189	182.641	9.38283e-05	84.7025	2.15626	2570.06	45.2233	117.483	2.06104	0.64325	3420.14	3.20531	226.393	125.675	0.380949	0.320296	1.98474	0.555117
	0.375695	0.000281262	0.000264497	0.000374759	2.31606	0.00012106	4.17961	0.0269703	155.011	2.43811	377.934	8.0172e-05	155.432	2.43151	2545.57	51.0691	269.478	1.1979	0.71303	11302.2	4.14794	324.093	383.607	0.38416	0.420053	1.91235	1.18363
	0.346729	0.000263023	0.000179231	0.0004821	3.91821	0.000204935	3.05706	0.0597344	66.9502	1.78328	119.391	0.000135718	67.466	1.76965	1948.27	45.1917	83.6168	1.65021	0.70036	6581.69	3.91141	185.626	120.888	0.474677	0.553412	2.35611	0.651245
	0.309566	0.000265691	0.000216812	0.000442182	3.93491	0.000167647	3.9131	0.0803636	85.3329	2.28264	194.785	0.000111025	85.9958	2.26505	2635.7	47.5321	146.822	1.44486	0.753764	9751.58	4.23997	262.853	145.491	0.450134	0.573635	2.46698	0.553508
	0.344916	0.000286427	0.000191158	0.000448507	0.866995	0.000171799	3.80632	0.0526179	377.285	2.22035	837.704	0.000113774	377.428	2.21951	2432.51	47.1746	627.986	1.53213	0.749651	41953.6	8.98603	251.849	2910.3	0.448045	0.534322	2.47725	11.5558
	0.299368	0.000237791	7.28476e-05	0.000410122	3.60079	0.000122847	3.97172	0.0366573	94.6723	2.31684	219.34	8.13557e-05	95.2894	2.30183	2714.69	45.2987	135.968	2.49447	0.619894	5177.35	2.98988	242.309	154.98	0.395389	0.477292	1.83709	0.639597
	0.368057	0.000298543	0.000213045	0.000480842	1.80441	0.000146668	3.527	0.0444487	167.935	2.05741	345.512	9.71308e-05	168.212	2.05403	2174.38	47.9191	233.858	1.50597	0.676846	10632.2	4.68146	240.791	561.235	0.404096	0.405017	1.95719	2.3308
	0.307816	0.000276616	0.00014623	0.000431964	3.54959	0.000184009	3.67236	0.028591	88.8023	2.14221	190.233	0.000121861	89.3649	2.12872	2479.81	45.6449	139.852	1.72663	0.735162	9689.63	4.54199	227.482	172.403	0.46223	0.568357	2.54479	0.757876
	0.350759	0.000251712	4.93121e-05	0.000528766	1.37204	0.000147564	3.86534	0.0600598	242.076	2.25478	545.829	9.77248e-05	242.307	2.25263	2448.2	41.9771	339.951	3.60258	0.622816	17363.8	5.67886	202.502	1125.22	0.427303	0.530037	2.15955	5.55655
	0.361071	0.00027035	0.000260596	0.000408777	2.69567	0.000154332	4.33228	0.0483148	138.021	2.52716	348.801	0.000102207	138.527	2.51793	2700.36	49.2729	275.706	1.27473	0.790441	19069.1	5.34873	312.716	336.156	0.440136	0.576916	2.52459	1.07496
	0.34585	0.00035861	0.000138507	0.000413151	4.92656	0.000188663	3.56605	0.052771	62.0563	2.0802	129.089	0.000124942	62.8072	2.05533	2275.71	44.3004	91.6416	1.8706	0.709908	5075.94	3.76967	208.075	82.6242	0.440493	0.433993	2.51918	0.397088
	0.317324	0.000292024	0.000281133	0.000491817	2.59003	0.000181497	3.84789	0.0628237	127.596	2.2446	286.402	0.000120197	128.028	2.23702	2562.65	47.6256	223.665	1.36145	0.780947	15923.3	5.66552	259.49	337.357	0.459046	0.558033	2.63774	1.30008
	0.302483	0.000328355	0.000150495	0.000478321	0.343303	0.000162744	3.98466	0.0972806	997.521	2.32438	2318.62	0.000107777	997.581	2.32425	2711.43	46.0627	1690.38	1.81928	0.729044	84915.4	13.9659	251.366	18577.2	0.428296	0.462361	2.45742	73.905
	0.368209	0.0003512	0.000221459	0.000509011	4.03032	0.000148964	3.32979	0.0412725	70.8883	1.94238	137.692	9.86516e-05	71.4657	1.92669	2052.31	47.1586	89.5215	1.5176	0.650158	3274.15	2.94182	220.17	101.827	0.388461	0.328002	1.86459	0.462491
	0.327044	0.000323435	0.000207671	0.000480271	5.52319	0.000164368	3.96822	0.0587797	61.5561	2.31479	142.49	0.000108853	62.4882	2.28026	2605.16	46.6439	104.711	1.52117	0.734865	5525.75	3.51061	256.687	71.0122	0.428156	0.465108	2.43497	0.276649
	0.353179	0.000329331	0.000169117	0.000488879	3.85135	0.000135661	3.63044	0.0586698	80.8918	2.11775	171.309	8.9842e-05	81.4941	2.1021	2290.84	46.9602	110.554	1.71591	0.645351	3797.71	2.97725	238.032	119.65	0.382189	0.347549	1.85269	0.502662
	0.291147	0.000316348	0.000242771	0.000461101	4.10469	0.000139198	4.19785	0.0187996	87.7439	2.44875	214.863	9.21842e-05	88.4849	2.42824	2902.92	48.7025	156.562	1.38032	0.728661	6437.39	3.63536	296.038	127.923	0.401567	0.428843	2.19592	0.432116
	0.316259	0.000304364	0.000115612	0.000474858	3.07607	0.000154967	4.08512	0.0360695	114.026	2.38299	271.723	0.000102627	114.57	2.37168	2724.89	45.1857	191.552	2.0964	0.704952	9566.58	4.47664	247.984	235.197	0.425446	0.484664	2.38774	0.948436
	0.288926	0.000269934	0.000186969	0.00045338	2.92652	0.000136612	2.72205	0.0212675	79.8696	1.58786	126.822	9.04713e-05	80.2146	1.58103	1888.27	47.6679	72.3015	1.56167	0.570102	2140.59	2.42456	183.894	153.596	0.377339	0.321152	1.40321	0.835245
	0.355088	0.000280159	0.000216576	0.000402128	0.871778	0.00017546	3.34646	0.0574487	329.883	1.9521	643.967	0.000116199	330.011	1.95135	2105.42	47.7996	463.507	1.36447	0.719769	29880.5	7.88456	227.328	2503.55	0.443238	0.490511	2.22436	11.0129
	0.345215	0.00028216	0.000227795	0.000367596	2.5639	0.000178446	3.75231	0.0702926	125.696	2.18885	275.13	0.000118176	126.114	2.18161	2396.9	48.263	213.21	1.27072	0.77494	15648.2	5.43854	259.864	333.518	0.456026	0.553767	2.52916	1.28344
	0.315503	0.0002979	0.00013414	0.000409977	3.9892	0.00015857	3.68493	0.0376216	79.26	2.14954	170.372	0.000105013	79.8926	2.13252	2460.67	45.9325	117.108	1.79852	0.687367	5694.25	3.58168	231.146	125.174	0.422719	0.455599	2.19688	0.541536
	0.322332	0.000210336	0.000173552	0.000392022	4.74637	0.000185491	4.36101	0.0568507	78.7851	2.54392	200.423	0.000122841	79.6711	2.51563	2883.07	46.8291	164.991	1.53787	0.823212	18826.4	4.97305	284.339	125.126	0.506131	0.89042	3.03152	0.44006
	0.292053	0.000367942	8.25321e-05	0.000470553	2.44872	0.000176221	3.4462	0.0686765	120.879	2.01028	243.001	0.000116702	121.245	2.00421	2380.09	41.9919	156.058	2.86852	0.64221	6334.34	4.59484	180.672	311.188	0.422551	0.385265	2.29452	1.7224
	0.303114	0.000344958	0.000198588	0.000588077	3.95744	0.000118626	3.21554	0.0246675	69.7207	1.87573	130.777	7.85605e-05	70.2685	1.86111	2186.08	47.3936	74.9443	1.72092	0.573069	1557.95	2.14349	214.739	90.7272	0.345529	0.256877	1.43431	0.422501
	0.353352	0.000337279	0.000146201	0.000408204	3.32205	0.000164654	3.17325	0.069972	82.0021	1.85106	151.791	0.000109043	82.4577	1.84084	2001.82	45.6557	98.1854	1.75862	0.646845	4139.3	3.40539	196.658	150.283	0.408302	0.360693	1.96916	0.764185
	0.336565	0.000211485	0.000156611	0.000443087	5.19213	0.000153787	3.76505	0.0764998	62.1509	2.19628	136.501	0.000101846	62.9846	2.16721	2436.81	46.6429	94.5893	1.72275	0.692958	6453.4	3.12185	243.534	79.5733	0.446539	0.632526	2.16527	0.326744
	0.32969	0.000313653	0.000246464	0.000439071	7.14242	0.000166479	3.51998	0.0577608	42.1358	2.05332	86.5185	0.000110251	43.1883	2.00329	2301.81	46.966	60.3887	1.33624	0.697986	2965.17	2.70028	230.848	36.9047	0.421246	0.426769	2.16668	0.159866
	0.333101	0.000345499	0.000262965	0.000381739	3.22225	0.000161989	3.63991	0.0711611	96.9812	2.12328	205.918	0.000107277	97.4883	2.11224	2368.12	48.7483	151.105	1.20937	0.733812	7152.67	4.15619	257.175	185.952	0.414318	0.397484	2.2229	0.723058
	0.308431	0.000393462	0.000194924	0.000406686	0.318211	0.000144047	3.42715	0.0848981	925.608	1.99917	1850.45	9.53953e-05	925.656	1.99907	2312.17	47.5697	1215.58	1.52607	0.656912	35766.4	10.4825	230.574	16373.7	0.377087	0.293743	1.87078	71.0128
	0.331388	0.000223328	0.000231561	0.000461198	2.26361	0.000150357	3.63331	0.0580231	137.876	2.11943	292.219	9.95742e-05	138.233	2.11396	2369.89	48.1404	204.099	1.51478	0.698444	12727.4	4.48348	250.346	396.211	0.435981	0.571236	2.06496	1.58265
	0.327057	0.000151772	0.000178395	0.000556117	4.24714	0.000154989	3.68195	0.047753	74.37	2.1478	159.732	0.000102642	75.0419	2.12857	2417.17	45.2267	106.781	2.25746	0.6685	9722.77	3.34286	223.916	124.702	0.477936	0.872442	2.14329	0.556912
	0.310701	0.000307843	0.000242167	0.000365588	4.18414	0.000159578	3.62944	0.0564369	74.4174	2.11717	157.554	0.00010568	75.0701	2.09876	2440.61	48.684	114.234	1.22939	0.725045	5634.39	3.55992	255.758	111.27	0.419843	0.436662	2.17584	0.435061
	0.305401	0.000221201	0.000155473	0.000440676	3.98634	0.000158597	3.60408	0.0687941	77.5769	2.10238	163.096	0.000105031	78.1953	2.08576	2442.2	46.6884	112.705	1.70748	0.691034	7233.08	3.51429	233.577	129.561	0.446705	0.60022	2.14907	0.554683
	0.370342	0.000232272	0.000165853	0.000483737	3.80864	0.000201763	3.41109	0.0496738	76.8594	1.9898	152.935	0.000133618	77.4192	1.97542	2095.32	45.2052	112.32	1.74155	0.734429	11246.6	4.46314	207.247	148.492	0.49365	0.688718	2.58935	0.716497
	0.289197	0.000337099	0.000239319	0.000391808	2.52647	0.000136404	3.44252	0.0464384	117.029	2.00814	235.011	9.03335e-05	117.407	2.00168	2387.14	49.2627	155.678	1.28544	0.662431	4821.43	3.55231	248.388	261.354	0.37821	0.325089	1.77383	1.0522
	0.306159	0.000330633	0.000223151	0.000527505	2.79711	0.00016916	4.14113	0.0698382	127.139	2.41566	307.124	0.000112026	127.641	2.40616	2803.05	46.9709	236.845	1.53855	0.771172	13495.3	5.43376	271.641	297.346	0.438574	0.494099	2.64432	1.09463
	0.326684	0.000288241	0.000152379	0.00046555	2.13869	0.000152168	3.81623	0.0784939	153.285	2.22614	341.232	0.000100774	153.639	2.221	2506.72	46.694	238.374	1.75337	0.698568	11940.6	4.9037	247.386	450.17	0.420951	0.470603	2.19565	1.8197
	0.312349	0.000263105	0.000159198	0.000473723	4.27463	0.000193471	3.72628	0.0712577	74.7797	2.17366	162.546	0.000128127	75.4639	2.15395	2499.74	45.3456	122.447	1.7266	0.753308	9949.18	4.4685	227.805	124.977	0.479463	0.635716	2.70735	0.548616
	0.338361	0.00025907	0.000100364	0.000445136	2.39656	0.000138906	3.21836	0.0874234	115.347	1.87738	216.55	9.19906e-05	115.682	1.87194	2077.34	45.5402	129.411	2.14976	0.597603	5024.47	3.2982	198.446	285.056	0.396981	0.402842	1.68929	1.43644
	0.306047	0.000225449	0.000120273	0.000550209	2.32381	0.000148339	3.50145	0.0381914	129.427	2.04251	264.356	9.82378e-05	129.78	2.03695	2370.45	45.4839	170.089	2.15749	0.643409	8969.16	4.03799	215.368	356.495	0.429014	0.537933	1.96304	1.65528
	0.362833	0.000216873	0.000326666	0.000471975	4.62134	0.000159058	3.78154	0.0400828	70.1733	2.2059	154.795	0.000105337	70.922	2.18261	2350.58	48.0372	112.749	1.42008	0.728376	8689.56	3.5252	259.443	102.428	0.452857	0.642489	2.25541	0.3948
	0.366246	0.000256066	0.000161776	0.000415837	3.0012	0.000198387	4.06152	0.0391733	116.201	2.36922	275.306	0.000131382	116.729	2.35851	2511.09	46.127	223.542	1.60339	0.811975	23824.7	6.19105	256.931	287.443	0.497778	0.733397	3.03979	1.11875
	0.298801	0.000270793	0.000142833	0.000481794	2.03962	0.000138572	3.66581	0.0719086	154.401	2.13839	330.171	9.17695e-05	154.727	2.1339	2507.63	46.8696	216.554	1.83753	0.655884	8869.04	4.25627	239.425	455.826	0.403537	0.438279	1.92106	1.90384
	0.298056	0.000317863	0.000222102	0.000494349	2.88486	0.000144899	4.10076	0.0790378	122.064	2.39211	291.99	9.59594e-05	122.576	2.38211	2808.14	48.0465	212.107	1.49319	0.726418	9230.64	4.40466	281.453	257.653	0.408266	0.435838	2.24243	0.915438
	0.320186	0.000349959	0.000162281	0.000483235	3.97785	0.000161565	3.0991	0.0558656	66.8502	1.80781	120.853	0.000106996	67.3808	1.79357	2055.31	45.5191	76.2068	1.76867	0.630576	2748.18	2.94384	190.915	99.9651	0.399113	0.332344	1.8826	0.52361
	0.340503	0.000262588	0.000182529	0.000471085	0.817377	0.000150213	3.57356	0.0808557	375.719	2.08457	783.213	9.94791e-05	375.846	2.08387	2299.14	47.5105	535.761	1.61631	0.684054	28035	7.25714	239.827	2888.35	0.42096	0.478457	2.03363	12.0435
	0.331383	0.00023401	0.000103838	0.000469312	3.70376	0.000168935	3.25741	0.0714522	75.4812	1.90016	143.426	0.000111877	76.0014	1.88715	2124.72	44.5912	92.9292	2.12957	0.647924	5748.3	3.39912	192.57	135.794	0.446983	0.546802	2.07118	0.705164
	0.327901	0.000366776	0.000133569	0.000477215	3.60551	0.000186738	3.8276	0.0696241	91.117	2.23277	203.443	0.000123668	91.7124	2.21827	2509.64	44.1058	148.619	2.02354	0.730519	8292.33	4.75162	221.379	167.17	0.443714	0.4533	2.69116	0.755131
	0.333264	0.000265732	0.000244061	0.000513369	3.65386	0.000108617	3.59102	0.0662726	84.3511	2.09476	176.695	7.19316e-05	84.9171	2.0808	2335.74	49.4616	106.922	1.51035	0.605123	2953.57	2.34424	261.199	122.629	0.356325	0.341367	1.46832	0.469486
	0.329073	0.000198443	0.000132012	0.000480384	3.86737	0.000145208	3.7333	0.0699019	82.8383	2.17776	180.402	9.61642e-05	83.4602	2.16153	2443.54	46.3236	120.484	1.96199	0.667866	7694.9	3.3268	238.185	140.479	0.440005	0.634827	2.03912	0.589789
	0.369045	0.000322306	0.000202359	0.000502487	3.61878	0.000148201	2.8114	0.0596274	66.6801	1.63998	109.354	9.81462e-05	67.119	1.62926	1730.5	46.8625	64.8026	1.57589	0.592593	2154.17	2.4901	183.565	104.756	0.381353	0.300684	1.56867	0.570676
	0.312801	0.000291846	0.000208339	0.000311828	3.25088	0.000161816	3.37081	0.0495484	89.0185	1.9663	175.037	0.000107163	89.4922	1.95589	2259.79	48.7176	123.456	1.23465	0.705313	6199.18	3.75275	237.861	172.219	0.421764	0.435264	2.05617	0.724029
	0.326796	0.000219733	7.83706e-05	0.000419456	2.92143	0.000141326	3.88115	0.0692834	114.078	2.264	258.273	9.35937e-05	114.569	2.2543	2548.93	45.1825	169.503	2.35635	0.656295	9418.63	3.84046	235.569	250.043	0.429326	0.581942	2.06979	1.06144
	0.330097	0.000229892	0.000123507	0.000565448	3.48666	0.000126634	4.28832	0.0774034	105.574	2.50152	264.094	8.38639e-05	106.219	2.48632	2802.54	46.3671	176.821	2.1605	0.669539	8560.69	3.51472	274.11	185.313	0.410488	0.549696	2.0455	0.676054
	0.318553	0.000307276	0.000226795	0.000467736	5.17173	0.000130726	3.10922	0.0427449	51.5286	1.81371	93.4581	8.65737e-05	52.2145	1.78989	2066.98	48.0996	55.9583	1.43853	0.598753	1574.49	2.04111	213.872	54.5453	0.367731	0.305632	1.52013	0.255038
	0.333681	0.000288133	0.000226894	0.00042675	5.91357	0.000132694	3.53573	0.0753291	51.2032	2.06251	105.607	8.78765e-05	52.0893	2.02742	2298.34	48.4412	68.2836	1.37549	0.646582	2453.22	2.28865	246.676	49.4961	0.384301	0.374749	1.74778	0.200652
	0.303645	0.000193511	0.000207067	0.000347384	4.13051	0.000125479	3.21771	0.0399458	66.8349	1.877	125.449	8.3099e-05	67.4063	1.86108	2185.89	49.6763	77.499	1.36485	0.617774	3368.29	2.30564	236.082	96.171	0.398842	0.484363	1.51716	0.407364
	0.34377	0.000286762	0.000275575	0.000470238	3.68711	0.000149421	3.49796	0.0636734	81.4221	2.04048	166.14	9.89542e-05	81.9782	2.02663	2239.35	48.5106	114.134	1.34021	0.686976	5365.42	3.33188	244.741	134.783	0.409432	0.423842	1.96733	0.550716
	0.308834	0.000358153	0.000131089	0.000494506	4.63114	0.000145959	4.24912	0.0701693	78.6824	2.47865	195.026	9.66614e-05	79.5255	2.45238	2865.05	45.1906	135.694	2.05642	0.695774	5195.97	3.54881	257.996	101.644	0.401645	0.401133	2.32546	0.393976
	0.30148	0.00027413	0.000192221	0.000450704	1.66412	0.000160378	3.88812	0.0403212	200.746	2.26807	455.306	0.000106211	201.027	2.26489	2649.54	47.5623	335.873	1.53512	0.737685	19693.4	6.13486	261.507	789.146	0.43835	0.531834	2.35986	3.01769
	0.286353	0.000363194	9.19401e-05	0.000505545	3.51214	0.000168538	4.10384	0.0483227	100.297	2.39391	240.102	0.000111615	100.919	2.37915	2857.1	42.7802	167.383	2.67114	0.697132	7529.27	4.55119	223.303	182.382	0.428363	0.44312	2.60503	0.816745
	0.359017	0.000372891	0.000117037	0.000459858	5.35056	0.000143616	3.29401	0.0602009	52.7564	1.92151	101.372	9.51102e-05	53.5071	1.89455	2059.79	44.2133	60.1641	2.20966	0.593499	1739.92	2.32511	191.448	55.0259	0.374937	0.292865	1.76767	0.28742
	0.30681	0.000222185	0.000204839	0.000495995	2.22032	0.000154635	4.08862	0.100663	158.182	2.38503	377.269	0.000102407	158.577	2.3791	2764.91	47.471	279.544	1.65852	0.740968	19840.2	5.3964	273.937	481.73	0.453191	0.664575	2.39007	1.75854
	0.330213	0.000324421	0.000195839	0.000418516	3.75	0.000184872	4.12789	0.0607325	94.4691	2.40794	227.476	0.000122432	95.1364	2.39105	2697.23	46.7057	181.78	1.47331	0.799119	12865.7	5.20255	267.723	172.449	0.459226	0.546878	2.87179	0.644134
	0.322437	0.000262384	0.000172274	0.000391923	1.68725	0.000149975	3.63405	0.0281158	185.055	2.11986	392.291	9.93214e-05	185.321	2.11681	2402.11	48.019	273.139	1.50838	0.696267	14232.9	5.17348	249.136	690.518	0.421874	0.485627	2.0625	2.77165
	0.321998	0.000329675	0.000194038	0.000487581	5.56513	0.000170849	3.42915	0.0661252	52.7905	2.00034	105.599	0.000113145	53.6018	1.97006	2268.14	45.8886	72.3472	1.589	0.685113	3413.33	3.03315	214.691	59.61	0.422289	0.409775	2.18667	0.277655
	0.359658	0.000300691	0.00021577	0.000532342	1.86842	0.000163403	4.06829	0.0700375	187.067	2.37317	443.941	0.000108214	187.397	2.36898	2541.42	47.1526	335.161	1.58198	0.754967	21029.4	6.24391	268.931	654.734	0.438228	0.516702	2.51485	2.43458
	0.289299	0.000320189	0.000277332	0.000474884	4.86778	0.000149105	3.45118	0.0270911	60.7861	2.01319	122.374	9.87449e-05	61.5045	1.98968	2392.8	48.2274	82.7239	1.31883	0.675993	3110.16	2.8306	238.656	74.016	0.398018	0.371884	1.92737	0.310136
	0.270746	0.000222882	0.000125363	0.000407816	5.16704	0.000141637	3.32781	0.0302622	55.2015	1.94122	107.158	9.37992e-05	55.935	1.91577	2367.49	46.4942	66.7876	1.80382	0.623261	2940.29	2.41599	213.882	65.8052	0.413746	0.488633	1.76283	0.307671
	0.28291	0.000188906	0.000207535	0.000473903	2.6617	0.000176988	3.46907	0.0297432	111.932	2.02363	226.509	0.000117211	112.333	2.01641	2426.83	46.4817	161.861	1.70945	0.714588	14184.3	4.69987	222.841	303.856	0.484379	0.758256	2.31854	1.36355
	0.305698	0.00031324	0.00026638	0.000413311	2.50491	0.000155225	3.84735	0.0263007	131.919	2.24429	296.064	0.000102798	132.337	2.2372	2605.93	49.0564	220.256	1.24769	0.743945	10832.8	4.80836	275.278	328.914	0.418646	0.444969	2.2561	1.19484
	0.284918	0.000295041	0.000195052	0.000512134	2.6984	0.000150145	3.86225	0.0141054	122.921	2.25298	276.939	9.94337e-05	123.373	2.24473	2694.32	47.26	195.536	1.62422	0.706062	8961.12	4.38223	256.476	283.297	0.416913	0.458492	2.18961	1.10457
	0.340471	0.00028402	0.000166656	0.000510718	3.30414	0.000150614	3.77587	0.065669	98.1048	2.20259	216.085	9.97443e-05	98.6441	2.19055	2429.42	46.61	148.876	1.7512	0.68897	7428.69	3.83574	243.89	185.276	0.418477	0.466239	2.14344	0.759669
	0.338177	0.00031301	0.000242716	0.000420536	4.6254	0.000158966	3.79802	0.0676498	70.4168	2.21551	156.009	0.000105275	71.1695	2.19208	2452.17	48.1181	114.038	1.31657	0.73097	5891.04	3.54323	261.452	95.4812	0.421054	0.446829	2.26387	0.365196
	0.346028	0.000328973	9.88238e-05	0.000427075	5.7475	0.000163672	3.64714	0.0278648	54.3534	2.1275	115.637	0.000108392	55.2431	2.09323	2326.82	43.4459	75.675	2.31355	0.654419	3421.23	2.97181	204.677	58.8709	0.418422	0.417994	2.22578	0.287629
	0.303426	0.000307389	0.000229021	0.000390335	4.92995	0.000147226	3.68999	0.0659608	64.1687	2.1525	138.123	9.75009e-05	64.9463	2.12673	2507.52	48.5079	96.4802	1.30601	0.69851	4039.57	3.01839	258.148	78.315	0.404055	0.408835	2.03418	0.303373
	0.352417	0.000255081	0.000149998	0.000486703	3.52912	0.000150846	3.50324	0.0609638	85.2057	2.04356	174.123	9.9898e-05	85.7393	2.03084	2213.19	46.3864	115.044	1.8043	0.660705	6020.04	3.37704	224.115	151.675	0.421371	0.482026	1.99022	0.676776
	0.336055	0.000158255	0.000210125	0.000398749	3.6724	0.000159918	3.52221	0.00675241	82.3159	2.05462	169.128	0.000105906	82.8737	2.04079	2281.39	47.4493	117.979	1.6364	0.697573	11207.2	3.62553	235.772	159.626	0.477716	0.827712	2.12026	0.677036
	0.326283	0.000348265	0.000184221	0.000402968	4.8002	0.00015352	3.07647	0.0519857	54.9528	1.79461	98.6188	0.000101669	55.5847	1.77421	2022.01	46.714	61.8734	1.52377	0.627399	2066.44	2.52051	199.602	66.1813	0.388172	0.313906	1.76955	0.331566
	0.345463	0.000328243	7.89242e-05	0.000460084	4.28114	0.000151513	3.49853	0.0431776	70.1021	2.04081	143.065	0.00010034	70.7454	2.02225	2233.94	42.8099	87.2434	2.78031	0.609817	3244.92	2.95385	190.631	97.7991	0.400844	0.374653	1.99057	0.513029
	0.343554	0.000192251	0.000148854	0.000508121	1.7328	0.000131328	3.06107	0.0287705	151.777	1.78562	271.017	8.69722e-05	152.008	1.78291	1960.31	46.885	158.229	1.96728	0.583834	7323.62	3.44803	200.06	530.603	0.405924	0.488831	1.52118	2.65222
	0.311188	0.000264249	9.21516e-05	0.000518037	3.98235	0.000125846	3.87713	0.0823412	83.538	2.26166	188.934	8.3342e-05	84.2025	2.24381	2605.33	45.179	116.727	2.41398	0.617819	4144.85	2.83791	235.289	121.825	0.389668	0.428897	1.8345	0.517768
	0.34874	0.000274073	0.000161803	0.000455929	2.58625	0.000144993	3.40936	0.111398	113.22	1.98879	225.17	9.6022e-05	113.602	1.9821	2166.1	47.1381	146.43	1.6787	0.650309	6516.66	3.66213	225.234	264.882	0.4056	0.420867	1.86709	1.17603
	0.340797	0.000360037	0.000169182	0.000546929	4.76437	0.00013229	3.86445	0.0749408	69.5494	2.25426	156.782	8.76091e-05	70.3373	2.22901	2485.18	46.4138	101.689	1.8236	0.648601	3112.53	2.78442	247.514	81.4596	0.37468	0.328723	1.91571	0.329111
	0.323408	0.000272172	0.000218416	0.000377939	1.32946	0.000175379	3.73175	0.0397018	241.198	2.17685	525.053	0.000116145	241.414	2.17491	2463.15	48.2398	402.559	1.31736	0.766701	28599.5	7.34451	258.191	1233.17	0.455411	0.562489	2.47805	4.77618
	0.257576	0.000314678	0.000160438	0.000423238	3.98534	0.000172989	3.50523	0.0260253	75.4682	2.04472	154.311	0.000114562	76.0695	2.02856	2538.75	45.97	108.14	1.65318	0.700792	5200.07	3.75477	220.233	122.024	0.432366	0.447588	2.27981	0.554069
	0.302157	0.000372962	0.000275434	0.000564382	3.81908	0.000134349	3.96917	0.063302	89.1888	2.31535	206.503	8.89726e-05	89.8419	2.29852	2702.15	48.3438	142.764	1.43367	0.691342	4431.7	3.35053	275.803	131.474	0.377689	0.332319	2.00619	0.476695
	0.331907	0.000196091	0.000200761	0.000435473	1.62399	0.000166489	4.23722	0.0672867	224.18	2.47171	554.108	0.000110258	224.479	2.46842	2761.66	47.6382	435.474	1.59875	0.785902	43905.5	7.25166	285.897	1000.96	0.485873	0.841171	2.6699	3.50113
	0.29735	0.00027462	0.000237792	0.000453663	3.21217	0.000133043	3.69036	0.041355	98.6346	2.15271	212.332	8.81082e-05	99.1472	2.14158	2529.65	48.9983	142.913	1.40342	0.673065	5553.16	3.31971	263.421	180.512	0.394216	0.416423	1.85106	0.685263
	0.311049	0.000232368	0.000204554	0.000392129	1.72739	0.000131994	3.95293	0.0376452	196.612	2.30588	453.364	8.74131e-05	196.909	2.3024	2656.81	49.518	318.485	1.41175	0.702492	16010.5	4.91665	288.18	700.451	0.412376	0.524924	1.97436	2.43061
	0.290345	0.000302379	0.00016927	0.000481608	1.74087	0.000139497	3.65293	0.0654685	180.283	2.13087	384.16	9.23823e-05	180.559	2.12761	2528.95	47.3417	254.974	1.68955	0.663718	9435.92	4.64927	243.414	611.806	0.395879	0.393953	1.92819	2.51344
	0.305022	0.000309275	0.000170117	0.000440375	2.44897	0.000162749	3.79394	0.0310779	133.063	2.21313	294.486	0.000107781	133.466	2.20645	2572.25	46.7957	212.514	1.62095	0.721644	10939	4.95202	247.013	347.418	0.428594	0.466021	2.33294	1.40648
	0.313392	0.000293233	0.000200524	0.000458164	3.66091	0.00016912	4.08677	0.0370301	95.8107	2.38395	228.408	0.000112	96.456	2.368	2737.42	47.1132	175.249	1.5124	0.767261	11194.9	4.67298	269.701	174.542	0.447373	0.548157	2.60178	0.647169
	0.313216	0.000346056	0.000147653	0.00042999	1.54428	0.00016161	3.71674	0.0456507	206.797	2.1681	448.356	0.000107026	207.047	2.16548	2490.2	45.9881	313.9	1.79313	0.700112	13922.6	5.97632	233.706	831.92	0.416265	0.405895	2.2736	3.55968
	0.325553	0.000262969	0.000192465	0.000417059	2.4494	0.000150183	3.86326	0.0642001	135.47	2.25357	305.291	9.9459e-05	135.881	2.24676	2541.87	48.1822	219.888	1.47614	0.720255	12246.3	4.64828	266.652	352.188	0.426833	0.515004	2.19214	1.32078
	0.334768	0.000234191	0.000156218	0.000558742	4.61325	0.000136364	3.64714	0.0428029	67.7983	2.1275	144.241	9.0307e-05	68.5192	2.10511	2366.88	46.3204	92.121	1.94249	0.638662	4304.81	2.7318	232.656	89.7415	0.409944	0.491975	1.86494	0.385726
	0.292187	0.000311168	0.000297006	0.000414012	2.28743	0.000148924	3.3083	0.0530946	124.234	1.92984	239.752	9.86252e-05	124.563	1.92475	2284.41	49.4846	163.46	1.1891	0.68179	6344.72	3.97413	240.858	322.914	0.398498	0.369728	1.86222	1.34068
	0.378684	0.000263919	0.000132192	0.000383349	0.965739	0.000175295	3.63178	0.0501429	323.171	2.11854	684.65	0.00011609	323.324	2.11753	2201.32	46.2259	496.211	1.72451	0.724766	36916.6	8.15031	230.732	2276.34	0.45573	0.564507	2.41153	9.8657
	0.31894	0.000270326	0.000171123	0.000469715	2.5332	0.000155683	3.78543	0.0353524	128.344	2.20817	283.405	0.000103101	128.76	2.20103	2515.08	47.0243	200.759	1.65865	0.708381	11064	4.60414	248.873	325.295	0.430386	0.508766	2.22617	1.30708
	0.314694	0.000348868	0.000210067	0.00052711	1.75298	0.000160144	4.0836	0.0483343	200.145	2.3821	476.767	0.000106056	200.457	2.3784	2730.11	47.0522	356.284	1.58583	0.747291	17328.1	6.30929	268.795	718.161	0.421493	0.438202	2.4745	2.67177
	0.330575	0.00024209	0.000199572	0.000507206	4.13387	0.000162816	3.57831	0.0643979	74.2643	2.08735	155.016	0.000107825	74.9003	2.06962	2336.86	46.6299	107.981	1.65408	0.69658	6858.1	3.53136	231.326	118.795	0.443745	0.558666	2.18918	0.51354
	0.334356	0.000269204	0.000161615	0.000457553	3.44066	0.000169804	3.77039	0.0604076	94.0667	2.19939	206.89	0.000112453	94.627	2.18637	2448.39	46.3358	150.315	1.68268	0.726547	9883.81	4.34531	240.678	182.983	0.448891	0.553516	2.41193	0.760281
	0.312151	0.000262726	0.000263913	0.000371306	3.38022	0.000137188	3.62118	0.065296	91.9632	2.11235	194.259	9.08531e-05	92.492	2.10028	2429.94	50.0536	134.315	1.20439	0.691422	5932.94	3.31856	269.735	163.17	0.402233	0.440179	1.87191	0.604926
	0.247285	0.000297576	0.000225854	0.000398345	3.65063	0.000154981	3.59423	0.051597	84.5014	2.09663	177.168	0.000102636	85.0673	2.08269	2639.3	48.3769	125.31	1.32809	0.707295	5457.13	3.62111	250.092	143.612	0.416185	0.435354	2.09698	0.574237
	0.297134	0.000304638	0.000208983	0.000528396	4.72889	0.000168945	3.39957	0.0719333	61.644	1.98308	122.245	0.000111884	62.3322	1.96119	2331.03	46.2035	83.6662	1.59611	0.684414	4055.51	3.22546	215.77	82.8565	0.426762	0.436536	2.15257	0.384003
	0.314779	0.000183813	0.000214782	0.000504021	2.61388	0.00017116	3.46403	0.0520977	113.817	2.02068	229.989	0.000113351	114.21	2.01374	2315.6	46.3155	160.934	1.79892	0.699747	14117.8	4.53209	220.929	311.035	0.47884	0.752607	2.23923	1.40785
	0.325191	0.000239611	0.000154739	0.000399635	3.52679	0.000117702	3.83749	0.0247989	93.3971	2.23854	209.073	7.79481e-05	93.9813	2.22462	2526.27	48.7921	134.332	1.60817	0.642511	5037.8	2.84736	271.622	151.546	0.383832	0.438602	1.7011	0.557928
	0.333461	0.000340611	0.000208296	0.000427894	2.03981	0.000149573	3.74841	0.0731567	157.866	2.18657	345.185	9.90549e-05	158.198	2.18198	2437.39	48.0075	243.626	1.44574	0.705784	10183.1	4.87289	256.852	464.51	0.402238	0.384577	2.12029	1.80848
	0.288535	0.000364575	0.000157706	0.00052991	3.21099	0.000160653	3.52719	0.0541942	94.308	2.05752	194.041	0.000106393	94.7977	2.04689	2448.13	45.3363	129.821	1.88262	0.669037	4839.06	3.82061	215.545	177.662	0.405643	0.362024	2.13637	0.824248
	0.353269	0.000295292	0.00019641	0.000408256	0.669203	0.000172996	3.66083	0.00923712	470.128	2.13548	1003.95	0.000114567	470.235	2.135	2309.7	47.5057	745.911	1.443	0.742975	48096.9	9.86168	245.634	4650.14	0.443435	0.502021	2.39953	18.9311
	0.315823	0.00026648	0.000162946	0.000429075	4.03079	0.0001568	4.18093	0.0551322	88.9977	2.43887	217.054	0.000103841	89.7228	2.41916	2790.57	47.071	161.934	1.62278	0.746054	10008.7	4.16472	275.421	145.043	0.440786	0.571327	2.46435	0.526622
	0.290836	0.000197268	0.000137993	0.000465112	2.26074	0.000147505	3.28879	0.0656853	124.961	1.91846	239.733	9.76853e-05	125.284	1.91352	2275.28	46.5781	152.665	1.89366	0.636814	8565.04	3.80406	212.138	357.872	0.433944	0.574276	1.83371	1.68698
	0.329312	0.000210532	0.000151506	0.000476607	2.99779	0.000182321	3.88122	0.0495813	111.169	2.26405	251.693	0.000120742	111.673	2.25384	2539.46	45.7979	190.155	1.82671	0.755503	18665.1	5.24759	242.035	271.986	0.491769	0.78339	2.66962	1.12375
	0.297869	0.000229141	0.00017515	0.000440401	2.95844	0.000135365	3.39745	0.035931	98.6094	1.98185	195.429	8.96458e-05	99.0447	1.97314	2327.15	47.9884	124.729	1.61511	0.638234	5434.13	3.15546	232.618	201.683	0.405698	0.467844	1.73523	0.867014
	0.356762	0.000299659	0.000178545	0.000329209	1.9957	0.000183381	3.78892	0.0753369	163.101	2.2102	360.487	0.000121445	163.43	2.20576	2377.6	47.431	279.847	1.38847	0.776301	20685.5	6.40305	253.43	558.467	0.457945	0.541782	2.62788	2.20363
	0.347828	0.000266783	0.000235486	0.000457632	0.252671	0.00017078	3.71584	0.062282	1263.9	2.16757	2739.6	0.000113099	1263.94	2.1675	2364.13	47.8454	2052.28	1.42414	0.749118	144765	16.1483	252.904	33677.4	0.451011	0.556901	2.40486	133.163
	0.321113	0.000205265	0.000143145	0.000515127	4.23043	0.000145048	3.49936	0.039253	70.9622	2.04129	144.855	9.60581e-05	71.5983	2.02316	2317.6	46.0917	93.0757	1.97177	0.642546	5270	2.92079	221.03	107.696	0.430872	0.573806	1.90648	0.487244
	0.310621	0.000378294	0.000157178	0.00044237	2.23728	0.000173252	3.42389	0.082366	131.46	1.99727	262.561	0.000114736	131.793	1.99223	2302.66	45.3663	180.087	1.78808	0.685888	7582.5	4.85278	209.51	364.899	0.41622	0.366206	2.24238	1.74168
	0.341693	0.000351445	0.000148012	0.000531188	3.0371	0.000165356	3.44491	0.052785	97.3927	2.00953	195.714	0.000109508	97.8455	2.00023	2212.37	45.0048	130.359	1.94294	0.666071	5601.58	3.94061	207.45	197.388	0.412727	0.377732	2.14879	0.951499
	0.349535	0.000238347	0.000142917	0.000511428	4.6247	0.000157001	2.98541	0.0818944	55.3592	1.74149	96.4073	0.000103974	55.9507	1.72308	1894.43	45.4452	58.6425	1.90673	0.608279	2931.2	2.50945	183.315	75.0855	0.421111	0.455549	1.75751	0.409598
	0.290001	0.000222855	0.000164891	0.000436296	4.19212	0.000130081	3.90133	0.0200534	79.8395	2.27578	181.697	8.61461e-05	80.5424	2.25592	2702.23	48.0307	121.659	1.65464	0.669573	5670.39	2.99472	267.589	116.424	0.410238	0.528509	1.90646	0.435085
	0.317579	0.000210427	0.000242057	0.000426925	3.59255	0.000176046	4.26452	0.0627972	101.885	2.48763	253.454	0.000116587	102.546	2.4716	2839.06	47.7538	205.457	1.44909	0.810628	21100.1	5.26692	289.137	208.015	0.491992	0.829932	2.82681	0.719434
	0.331765	0.000188082	0.000101215	0.000406434	3.26225	0.000122895	2.94974	0.0425904	77.6265	1.72068	133.57	8.13876e-05	78.0425	1.71151	1922.93	46.8661	73.8818	2.00959	0.553131	2874.32	2.20483	192.628	138.647	0.390742	0.448854	1.36649	0.719764
	0.314442	0.000299338	0.000168442	0.000418701	3.34135	0.000152546	2.99214	0.0387575	76.8744	1.74542	134.178	0.000101024	77.3064	1.73566	2001.14	46.8857	83.304	1.58793	0.620848	3101.85	2.90606	195.561	136.461	0.39778	0.355012	1.72012	0.697793
	0.31671	0.000216084	0.000201285	0.000449901	3.89698	0.000215406	3.70102	0.0644317	81.496	2.15893	175.944	0.000142653	82.1171	2.1426	2467.05	45.7823	140.826	1.57779	0.800402	17482.2	5.33543	230.64	163.927	0.525914	0.857262	2.9984	0.710749
	0.368213	0.000278354	0.000145178	0.000442538	2.49562	0.000195179	4.0521	0.0434976	139.457	2.36372	329.639	0.000129258	139.896	2.35631	2497.48	45.5031	261.772	1.75358	0.794119	24593.5	6.59124	249.448	404.886	0.485676	0.663144	2.98785	1.62313
	0.34078	0.000176845	9.84539e-05	0.000448175	4.06485	0.00018683	3.55389	0.0250262	75.0143	2.0731	155.512	0.000123728	75.6357	2.05607	2285.53	44.3844	110.09	2.16525	0.707919	12105.7	4.09158	208.153	139.032	0.505532	0.871826	2.49561	0.667934
	0.307488	0.00027549	0.000119719	0.000366824	2.09266	0.000141973	3.79662	0.0562793	155.855	2.2147	345.172	9.40221e-05	156.2	2.2098	2564.94	46.8493	233.093	1.81634	0.675297	10322.7	4.52421	247.755	455.516	0.409899	0.457082	2.03823	1.83858
	0.305265	0.000269364	0.000227962	0.000414059	5.12004	0.000165634	3.12309	0.0600898	52.2837	1.8218	95.2504	0.000109692	52.9661	1.79833	2116.68	47.4759	63.5127	1.3594	0.666797	3184.2	2.75519	209.289	64.6749	0.425406	0.443832	1.93513	0.309021
	0.360888	0.000262667	0.00015628	0.000463993	3.53259	0.000138774	3.58509	0.026408	87.1104	2.0913	182.174	9.19033e-05	87.6571	2.07826	2235.27	47.1553	118.723	1.72361	0.651698	5382.31	3.15607	237.017	148.4	0.403655	0.440699	1.8737	0.626115
	0.317663	0.000294118	0.000163987	0.000497144	3.48233	0.000178524	4.38897	0.0671197	108.186	2.56023	276.981	0.000118228	108.846	2.54471	2921.55	45.9005	220.519	1.74192	0.796152	16497.6	5.53337	274.925	215.9	0.466113	0.619943	2.95139	0.785305
	0.297848	0.000391344	0.000153352	0.000573172	3.63044	0.000191989	4.24061	0.0470111	100.254	2.47369	247.997	0.000127145	100.918	2.45741	2904.77	44.0674	193.176	2.00828	0.778944	11311.8	5.56961	244.839	186.609	0.453288	0.483877	3.06512	0.762169
	0.304739	0.000309161	0.00012221	0.000375739	0.752668	0.000131775	4.33709	0.065478	495.204	2.52997	1252.85	8.72684e-05	495.346	2.52924	2941.7	47.1266	877.181	1.87255	0.700148	34264.5	8.1461	286.384	3895.88	0.396691	0.432692	2.16529	13.6037
	0.310861	0.000225094	0.000284784	0.000479849	5.68383	0.000129933	3.74477	0.0233759	56.4378	2.18445	123.285	8.60482e-05	57.3417	2.15001	2517.58	48.5761	81.4564	1.46109	0.660714	3697.79	2.44767	262.716	59.7469	0.404405	0.498121	1.8149	0.22742
	0.332314	0.000375371	0.000216251	0.000410487	4.97301	0.000150845	3.46991	0.0185307	59.8164	2.02412	121.075	9.98972e-05	60.5537	1.99947	2260.18	47.3895	81.0909	1.41468	0.669756	2796.17	2.83522	231.687	69.5148	0.388125	0.322495	1.95946	0.300038
	0.313763	0.0003081	0.000129016	0.000403679	1.71987	0.00014606	3.40728	0.0674229	170.214	1.98758	338.315	9.67284e-05	170.469	1.98461	2281.05	46.3053	217.054	1.84915	0.641572	8154.69	4.49144	217.214	587.823	0.397996	0.377619	1.88321	2.70619
	0.310982	0.000387417	0.000192836	0.000525408	2.83325	0.000159679	3.13534	0.0550085	95.0296	1.82895	173.804	0.000105748	95.4145	1.82157	2107.5	46.0077	110.981	1.68262	0.638542	3590.43	3.51111	197.317	195.335	0.390448	0.301339	1.88967	0.989957
	0.319945	0.000307626	0.000162719	0.000355969	1.90852	0.00017314	4.68256	0.0495798	210.785	2.73149	575.758	0.000114662	211.174	2.72647	3106.56	47.2898	481.413	1.52384	0.836138	36024.7	7.92916	311.341	761.143	0.461834	0.615905	3.06683	2.44472
	0.328586	0.000317655	0.000166034	0.000363553	5.20124	0.000180559	4.02245	0.0334591	66.283	2.34643	155.528	0.000119576	67.1752	2.31526	2634.71	46.2425	119.666	1.52884	0.769418	7841.28	4.12265	255.735	85.7444	0.451969	0.528206	2.71589	0.335286
	0.286124	0.000240752	0.000163553	0.000455958	4.80509	0.000115798	3.94419	0.043239	70.3802	2.30078	161.929	7.66872e-05	71.191	2.27457	2746.84	48.2972	103.29	1.68295	0.637872	3551.42	2.45641	273.54	83.2074	0.381448	0.439107	1.71117	0.304188
	0.32398	0.000236922	0.00011588	0.000451569	4.20248	0.000140449	3.3289	0.0659625	67.9562	1.94186	131.961	9.30128e-05	68.5574	1.92483	2195.39	45.991	81.2056	1.97527	0.615375	3561.13	2.6417	209.346	98.293	0.407926	0.457979	1.75632	0.469525
	0.29765	0.000304089	0.000225999	0.0002975	3.84104	0.000151032	3.99292	0.0571513	89.2081	2.3292	207.784	0.000100021	89.8689	2.31208	2735.88	49.6527	156.893	1.16193	0.755076	7748.48	3.94859	292.681	144.573	0.417624	0.460905	2.26863	0.493961
	0.313979	0.000261626	0.000179174	0.000425181	4.53935	0.000140342	3.88064	0.0517814	73.3184	2.2637	165.971	9.29416e-05	74.0736	2.24063	2597.12	47.8613	114.632	1.54266	0.690675	5418.19	3.13626	264.295	99.1094	0.411916	0.482408	2.04291	0.374995
	0.342374	0.000182763	0.000124054	0.000402191	3.12959	0.000195539	3.70025	0.076346	101.514	2.15848	219.116	0.000129496	102.015	2.14788	2373.9	45.5064	166.296	1.83693	0.758938	20879.2	5.26315	227.822	250.967	0.518814	0.922349	2.72858	1.10159
	0.288806	0.000327319	0.000140362	0.000394933	4.61876	0.000138223	4.2721	0.0382931	79.321	2.49206	197.672	9.15386e-05	80.1664	2.46578	2964.02	46.7083	138.714	1.76926	0.701736	5264.47	3.39791	277.107	101.915	0.398399	0.417929	2.21425	0.36778
	0.320213	0.000336282	0.000180829	0.00043314	4.34981	0.00014724	3.90367	0.0473133	76.9806	2.27714	175.296	9.75096e-05	77.7096	2.25578	2588.8	47.1574	122.601	1.57385	0.699393	4971.71	3.40284	258.101	105.971	0.401897	0.396421	2.15781	0.410581
	0.363764	0.000332288	0.000141024	0.000472497	3.7328	0.000170791	3.77267	0.0227156	86.7385	2.20072	190.887	0.000113107	87.3456	2.18543	2341.63	45.1295	135.441	1.88911	0.709533	7426.79	4.14869	228.448	149.451	0.431459	0.450842	2.4249	0.654202
	0.347281	0.000268959	0.000179217	0.000502824	1.94307	0.000136547	4.26246	0.0452555	188.46	2.48643	468.592	9.04284e-05	188.82	2.48169	2714.18	47.8311	335.762	1.68513	0.716534	17143.5	5.22238	289.934	598.38	0.413444	0.505688	2.20151	2.06385
	0.345192	0.000279749	0.000127677	0.000475246	3.25373	0.000167539	3.47138	0.0219307	91.5938	2.02497	185.475	0.000110953	92.0822	2.01423	2217.52	45.2084	125.351	1.94495	0.675839	7059.64	3.91517	210.94	182.751	0.435356	0.484167	2.19238	0.866366
	0.287294	0.000275985	0.000148902	0.000360484	1.50834	0.000172248	3.8524	0.0425921	219.455	2.24723	493.167	0.000114071	219.708	2.24465	2678.52	46.9591	370.575	1.57982	0.751419	23880.4	6.9209	252.574	983.408	0.452888	0.562283	2.51185	3.89354
	0.334748	0.000282759	0.000153754	0.000488537	4.05861	0.00016576	3.53361	0.0535642	74.7012	2.06127	153.98	0.000109775	75.3181	2.04439	2293.28	45.769	105.577	1.78339	0.685653	5807.32	3.55496	220.079	118.776	0.433022	0.481024	2.20158	0.539698
	0.341799	0.000258242	0.000259326	0.000443722	3.47448	0.000193626	3.22173	0.0539546	79.5942	1.87935	149.585	0.000128229	80.0775	1.868	2068.71	47.1039	109.05	1.35703	0.729018	8536.1	4.22034	212.531	159.967	0.468355	0.56215	2.34981	0.752679
	0.342352	0.000258516	0.00027473	0.000424729	5.2623	0.000136995	3.75114	0.040692	61.091	2.18816	133.677	9.07251e-05	61.9324	2.15844	2406.63	49.1707	91.9807	1.29197	0.688081	4313.38	2.74236	269.645	69.9017	0.404494	0.459088	1.92104	0.259236
	0.319588	0.000266825	0.000209963	0.000359367	2.02713	0.000159303	3.62648	0.0827051	153.687	2.11545	325.116	0.000105498	154.006	2.11106	2407.18	48.7381	236.472	1.30882	0.727347	13771.5	5.1131	256.118	489.868	0.43302	0.505866	2.18482	1.91266
	0.311556	0.00024642	0.000113723	0.000369297	2.5164	0.000176434	3.82298	0.0402747	130.484	2.23007	290.989	0.000116844	130.901	2.22296	2567.58	45.7744	214.668	1.83274	0.73772	16212.3	5.39558	238.158	361.771	0.467669	0.638818	2.54804	1.51904
	0.385727	0.000351623	0.000118406	0.000543	1.20194	0.000167754	3.48977	0.0248718	249.497	2.0357	507.902	0.000111096	249.68	2.03421	2091.27	44.0574	336.392	2.25695	0.662316	15927.2	6.42196	201.397	1293.71	0.417559	0.389522	2.21698	6.42366
	0.345994	0.000290403	0.000222214	0.000502675	2.02074	0.000169652	3.55236	0.0553172	151.022	2.07221	312.949	0.000112353	151.334	2.06794	2266.47	47.1113	224.729	1.51891	0.7181	13435.3	5.30836	234.415	487.951	0.437552	0.48488	2.27923	2.08157
	0.320179	0.000230883	0.000287737	0.000426165	4.29681	0.000140599	3.39718	0.0663774	67.822	1.98169	134.402	9.3112e-05	68.4489	1.96354	2253.02	49.081	89.1952	1.32411	0.663645	4352.75	2.77156	243.312	96.8591	0.411845	0.479919	1.79355	0.398086
	0.297525	0.000298374	0.000158854	0.000502752	3.2042	0.00014308	3.65257	0.0405128	97.8678	2.13067	208.524	9.47548e-05	98.3739	2.1197	2503.12	46.6514	137.866	1.78163	0.661154	5375.38	3.50653	236.345	182.766	0.401265	0.407972	1.97036	0.773304
	0.353155	0.000186087	0.000210656	0.000513449	3.28787	0.000155317	3.4453	0.0290379	89.9601	2.00976	180.798	0.000102859	90.4498	1.99888	2174.1	46.6071	120.826	1.82128	0.668293	9104.45	3.56345	222.51	185.261	0.454076	0.669623	2.01696	0.832599
	0.36371	0.000290801	0.000117563	0.000473895	4.16891	0.000168372	4.00823	0.0457521	82.4852	2.33813	192.862	0.000111505	83.2035	2.31795	2488.06	44.7798	138.844	2.0516	0.719914	8882.26	4.14099	238.965	131.19	0.444958	0.538664	2.53552	0.548995
	0.354233	0.000243721	0.00013722	0.000444908	3.65457	0.00016946	3.32292	0.0715095	78.0385	1.93837	151.268	0.000112225	78.5623	1.92545	2093.38	45.773	101.781	1.8008	0.672853	6597.14	3.56838	206.994	141.933	0.445863	0.537335	2.11978	0.685686
	0.297228	0.000285081	0.000167007	0.000449214	4.06218	0.000176725	3.45871	0.0758954	73.0534	2.01758	147.391	0.000117037	73.6578	2.00102	2371.26	46.0131	103.786	1.64137	0.704154	5995.09	3.75785	217.718	119.123	0.444472	0.497876	2.29743	0.547144
	0.334469	0.000293867	0.000195032	0.000474288	3.11729	0.00016779	3.41731	0.061694	94.1224	1.99343	187.627	0.000111119	94.5833	1.98372	2218.73	46.761	130.261	1.56036	0.694254	7023.53	3.99708	222.162	193.691	0.430154	0.454605	2.16241	0.871845
	0.345993	0.000352908	0.000131072	0.000531363	2.54327	0.000131122	4.02374	0.0687874	135.883	2.34718	318.943	8.68354e-05	136.327	2.33954	2567.23	45.878	208.56	2.09908	0.65391	6744.34	3.9524	251.8	302.136	0.379069	0.348885	1.99295	1.1999
	0.292378	0.000267055	0.000240655	0.000486542	3.13723	0.000156841	3.44883	0.0580298	94.3854	2.01182	189.886	0.000103868	94.8535	2.00189	2380.81	47.7308	130.693	1.46579	0.688271	6563.65	3.74245	233.607	190.54	0.424683	0.471886	2.03982	0.815643
	0.326713	0.000318919	0.000260526	0.00034677	2.6304	0.000167753	3.77306	0.0777107	123.192	2.20095	271.139	0.000111094	123.622	2.19329	2478.26	49.1661	208.09	1.15573	0.767467	11891.7	5.05087	271.171	301.736	0.431892	0.463045	2.39033	1.11271
	0.313754	0.000169612	0.000135677	0.000501364	4.11152	0.000177209	3.67496	0.0363394	76.6862	2.14373	164.394	0.000117357	77.3359	2.12572	2460.28	44.9452	116.701	2.10303	0.709888	12103.8	3.99572	220.718	138.909	0.499764	0.891399	2.44727	0.629352
	0.342338	0.000195173	0.000203041	0.000443237	2.63025	0.000181615	3.419	0.0113271	111.638	1.99441	222.652	0.000120275	112.028	1.98747	2193.58	46.7081	160.789	1.61612	0.722154	15509.7	4.80674	221.769	307.763	0.486082	0.742288	2.34501	1.38776
	0.358151	0.000301847	0.000248561	0.000527737	3.44957	0.000193823	3.70899	0.0581163	92.2954	2.16358	199.688	0.00012836	92.8479	2.1507	2322.42	46.424	154.028	1.48137	0.771341	12028.4	5.02084	237.661	186.373	0.467193	0.554292	2.70818	0.784198
	0.349912	0.000324812	7.59557e-05	0.000472592	3.49919	0.000174171	4.16146	0.0415099	102.082	2.42752	247.807	0.000115345	102.711	2.41266	2639.18	42.3014	174.87	2.86565	0.705672	10340.4	4.80735	221.398	194.229	0.446553	0.519254	2.73001	0.877284
	0.314858	0.000320114	0.000187691	0.000593547	2.62844	0.000171848	3.59373	0.0503159	117.424	2.09635	246.161	0.000113807	117.834	2.08906	2402.03	45.6809	173.386	1.77986	0.704358	9009.02	4.72305	222.963	288.278	0.432573	0.450121	2.33232	1.29294
	0.331135	0.000249486	0.000284831	0.000422508	3.97001	0.000173796	3.56808	0.0588235	77.1189	2.08138	160.514	0.000115097	77.7287	2.06505	2328.22	48.1954	119.265	1.28471	0.743023	8649.92	3.96157	246.413	131.903	0.455599	0.577382	2.33164	0.535292
	0.33037	0.000355369	0.00024873	0.000486171	4.16414	0.000222479	3.27557	0.0327413	67.4855	1.91075	128.948	0.000147337	68.0718	1.89429	2139.81	45.6325	98.3032	1.3984	0.762348	7110.19	4.60408	202.793	113.972	0.471935	0.475987	2.73796	0.562012
	0.282719	0.000254019	0.000145914	0.000343915	2.20194	0.000145164	3.81382	0.0459438	148.783	2.22473	331.003	9.61353e-05	149.148	2.21929	2668.71	48.0591	232.357	1.54739	0.701978	11602	4.61858	261.896	425.035	0.421592	0.509034	2.09298	1.62291
	0.33309	0.000330128	0.000208189	0.000480127	2.32121	0.000132594	3.35074	0.0484159	123.994	1.9546	242.359	8.78105e-05	124.332	1.94929	2180.02	48.1222	152.586	1.52004	0.629589	4625.31	3.41863	230.701	296.896	0.372527	0.314236	1.67916	1.28693
	0.316007	0.000269161	0.000174705	0.000437635	4.18074	0.000176428	3.0549	0.0700245	62.6884	1.78203	111.712	0.000116839	63.2373	1.76656	2038.45	46.1764	74.1106	1.58329	0.663405	4111.48	3.17013	193.667	97.8908	0.438109	0.464752	2.02482	0.505459
	0.313956	0.000251498	0.000107457	0.000517948	5.07316	0.000180903	3.42287	0.0562347	57.8347	1.99667	115.477	0.000119803	58.576	1.9714	2290.84	43.7287	77.6039	2.19996	0.67203	5083.78	3.32628	194.599	77.9281	0.459117	0.569148	2.31693	0.400455
	0.302485	0.000267258	0.000159789	0.000442078	4.64872	0.000157355	3.9634	0.0589208	73.1129	2.31198	169.036	0.000104208	73.9021	2.28729	2696.95	46.6637	121.778	1.66335	0.720429	6930.6	3.6244	256.592	102.149	0.436045	0.540518	2.33826	0.398099
	0.344403	0.000337999	0.000169734	0.000496314	2.54635	0.000130044	4.54475	0.0579981	153.292	2.6511	406.393	8.61216e-05	153.794	2.64245	2906.69	47.5954	291.791	1.72986	0.718	11327.6	4.63656	306.096	350.399	0.390165	0.408056	2.23248	1.14473
	0.31871	0.000236563	0.000228364	0.000414991	6.39255	0.000169087	3.87088	0.0289985	51.8254	2.25802	117.023	0.000111978	52.8693	2.21343	2572.73	47.3032	87.1486	1.39508	0.744716	6438.54	3.29467	257.519	55.3034	0.458874	0.634993	2.43147	0.214754
	0.311673	0.000284856	0.000166546	0.000405898	1.85983	0.000141183	3.80038	0.0190716	175.556	2.21689	389.188	9.34989e-05	175.863	2.21301	2551.96	47.9775	268.591	1.56765	0.690133	11743.3	4.82948	260.088	572.183	0.406207	0.440232	2.02983	2.19996
	0.338397	0.000209964	0.000156422	0.000426094	2.44717	0.000157382	3.03751	0.0315764	106.611	1.77188	188.902	0.000104227	106.934	1.76653	1960.5	46.8997	120.215	1.68583	0.636386	7184.46	3.60169	198.644	283.115	0.435604	0.531461	1.80622	1.42524
	0.308299	0.000228044	0.000160945	0.000363919	2.85886	0.000151411	3.8303	0.0280079	115.052	2.23434	257.065	0.000100272	115.526	2.22517	2584.66	48.115	184.754	1.50637	0.718707	11617.6	4.29562	263.64	264.095	0.439971	0.592981	2.18883	1.00173
	0.350345	0.00028675	0.000198342	0.000422009	4.74221	0.000157785	3.65696	0.0455559	66.1242	2.13323	141.058	0.000104494	66.8665	2.10955	2317.69	47.4143	99.2993	1.45872	0.703961	5326.36	3.28179	244.431	87.9653	0.423573	0.465899	2.16246	0.359877
	0.357261	0.000245191	0.000143561	0.000430971	3.78413	0.000163204	3.85385	0.0381396	87.3999	2.24808	196.482	0.000108082	88.0284	2.23203	2416.47	46.4184	141.658	1.73281	0.72097	9993.78	4.05436	246.884	154.951	0.450073	0.596302	2.36659	0.627625
	0.326903	0.000275886	0.00018855	0.000446403	4.74589	0.000175604	3.77023	0.00957395	68.1192	2.1993	149.815	0.000116294	68.8851	2.17485	2475.7	46.5361	110.876	1.54063	0.740087	7477.36	3.85943	242.753	96.8539	0.453067	0.555613	2.48116	0.398981
	0.327339	0.000236467	0.000104113	0.000417928	3.24784	0.000172243	3.79138	0.0119448	100.219	2.21164	221.649	0.000114068	100.752	2.19995	2487.98	45.1336	158.473	2.01932	0.714972	11846	4.52574	229.623	213.8	0.464645	0.643166	2.46177	0.931093
	0.339378	0.000262187	0.000121968	0.000417855	3.23239	0.000169682	3.6254	0.0314349	96.2908	2.11481	203.637	0.000112372	96.7975	2.10374	2336.47	45.5697	142.678	1.87169	0.70065	9177.85	4.23044	223.834	198.893	0.447736	0.546457	2.3191	0.888575
	0.299714	0.000261305	0.000135229	0.000461575	2.53264	0.000182324	3.27728	0.0721349	111.14	1.91174	212.471	0.000120744	111.5	1.90557	2238.93	45.2594	145.866	1.84937	0.686522	9243.48	4.59613	199.594	298.262	0.455605	0.533655	2.25715	1.49434
	0.355018	0.000329506	0.000189477	0.000536455	3.87193	0.000152074	3.52006	0.0629864	78.0143	2.05337	160.192	0.000100711	78.6013	2.03803	2214.88	46.4628	106.633	1.68354	0.665655	4425.23	3.27771	225.932	120.757	0.402098	0.377521	2.01353	0.534485
	0.326564	0.000236469	0.000227763	0.000455731	4.2222	0.000156099	3.66324	0.0464786	74.4309	2.13689	159.05	0.000103377	75.0955	2.11798	2406.65	47.7261	112.322	1.48273	0.706201	6987.12	3.45305	248.082	115.188	0.438514	0.56116	2.1479	0.464314
	0.290937	0.000253877	0.000135285	0.000441685	4.53108	0.000124364	3.53901	0.0642722	66.9864	2.06442	138.288	8.23605e-05	67.6739	2.04345	2448.04	47.2051	84.6867	1.80818	0.612394	2819.06	2.38877	234.465	84.3437	0.382981	0.401768	1.65102	0.359729
	0.316765	0.000233746	0.00016053	0.000338866	1.99312	0.000133221	3.49182	0.105444	150.507	2.03689	306.567	8.82255e-05	150.81	2.03281	2327.42	49.029	201.291	1.4529	0.656596	9028.51	3.94506	249.56	454.728	0.403558	0.46501	1.75938	1.82211
	0.360672	0.000227357	0.000206551	0.000499368	4.98891	0.000172937	3.64722	0.068795	62.6716	2.12755	133.337	0.000114528	63.4489	2.10148	2274.77	46.2716	95.7157	1.64857	0.717849	7675.44	3.53144	232.172	86.7914	0.463996	0.641571	2.36106	0.373824
	0.324771	0.000311438	0.00015191	0.000504034	3.19838	0.000161592	3.10695	0.0607927	83.4004	1.81239	151.154	0.000107015	83.8301	1.8031	2046.62	45.5389	95.6167	1.83428	0.632578	3935.59	3.29806	191.565	159.172	0.409338	0.375498	1.89292	0.830901
	0.318501	0.000330768	0.000184097	0.000476527	1.35704	0.000190383	3.71794	0.00828635	235.419	2.1688	510.575	0.000126082	235.638	2.16677	2471.83	45.9785	388.014	1.61869	0.759955	25198.1	7.82751	233.685	1180.66	0.455998	0.500563	2.68	5.05237
	0.290975	0.000332212	0.000201283	0.000438904	3.55958	0.000167161	3.66436	0.0383499	88.3597	2.13754	188.872	0.000110703	88.9226	2.12401	2534.61	47.0065	136.139	1.48582	0.7208	6501.59	4.07096	240.731	157.106	0.424522	0.428958	2.30666	0.652623
	0.332478	0.000309062	0.000118098	0.00042333	3.52285	0.000174933	4.1803	0.0494995	101.854	2.43851	248.372	0.00011585	102.49	2.42338	2722.23	44.8847	186.792	1.99336	0.752067	12153.4	4.99025	250.392	195.006	0.45239	0.550539	2.75414	0.7788
	0.345186	0.000334566	0.000182509	0.000416563	3.20311	0.000146263	3.51964	0.0406366	94.338	2.05312	193.687	9.68628e-05	94.8256	2.04257	2248.37	47.4346	129.23	1.53912	0.667209	4935.75	3.47046	235.454	172.864	0.393592	0.3584	1.9409	0.734174
	0.290691	0.000274705	0.000234586	0.000487825	4.9283	0.000152923	3.46871	0.0497952	60.3409	2.02341	122.095	0.000101273	61.0716	1.99921	2400.25	47.4469	82.4293	1.47342	0.675126	3762.27	2.89791	232.168	75.8433	0.415986	0.446686	1.9862	0.326674
	0.310248	0.000250707	0.000172607	0.000371398	3.12269	0.000164302	3.3583	0.0260855	92.3368	1.95901	180.889	0.00010881	92.7905	1.94943	2259.77	47.5311	125.221	1.46694	0.692254	7313.92	3.83755	225.576	193.089	0.437869	0.512772	2.08087	0.855981
	0.301918	0.000312007	0.000207847	0.000334629	3.23355	0.000145672	3.47421	0.0743706	92.242	2.02662	186.94	9.64712e-05	92.7278	2.01601	2366	48.9155	127.524	1.28682	0.682168	4945.56	3.43354	247.153	168.992	0.397265	0.377782	1.90791	0.683754
	0.316302	0.000320759	0.000228367	0.000436464	4.28536	0.000174931	4.15444	0.0329521	83.1626	2.42342	201.538	0.000115848	83.9272	2.40134	2770.95	47.3968	159.323	1.38265	0.790535	10173.8	4.60868	277.478	129.489	0.447824	0.525631	2.72906	0.466665
	0.317039	0.00030783	0.000199289	0.000432483	3.83747	0.000176724	3.51059	0.0364518	78.5053	2.04784	160.767	0.000117036	79.0857	2.03282	2338.99	46.7685	115.973	1.47479	0.721377	6597.59	3.97235	228.3	133.924	0.439196	0.468406	2.33392	0.586616
	0.300449	0.000289525	0.000197313	0.000489639	2.80697	0.000176078	3.21057	0.0614371	98.2226	1.87283	183.954	0.000116608	98.6131	1.86542	2191.06	46.4007	125.889	1.57926	0.684346	6741.46	4.12352	205.518	227.923	0.436682	0.455337	2.13389	1.10902
	0.306712	0.000300595	0.000244962	0.00043925	3.05112	0.000166903	3.99818	0.0714871	112.514	2.33227	262.413	0.000110532	113.042	2.32138	2704.13	48.1194	202.266	1.34419	0.770792	12197.7	4.95447	275.246	242.393	0.440745	0.51733	2.51711	0.880643
	0.349272	0.000237808	0.000155522	0.000375735	1.7801	0.000143194	2.96905	0.0556083	143.3	1.73195	248.188	9.48305e-05	143.53	1.72917	1884.82	47.8817	152.175	1.55454	0.613144	6763.39	3.68695	202.383	485.005	0.403727	0.417902	1.60863	2.39647
	0.306599	0.000332214	0.000207568	0.000466729	1.21552	0.00014847	3.25461	0.047078	230.084	1.89852	436.82	9.83248e-05	230.257	1.8971	2201.59	47.6554	284.31	1.50271	0.650862	9973.19	5.22525	219.756	1106.95	0.391804	0.340292	1.82988	5.03717
	0.236841	0.000279466	0.000260321	0.000440758	3.08827	0.000121165	4.15444	0.0533455	115.502	2.42342	279.911	8.02414e-05	116.057	2.41183	3093	50.1348	195.223	1.32534	0.697449	6561.91	3.53356	310.463	214.155	0.383953	0.419694	1.89852	0.689794
	0.345342	0.00027483	0.000214396	0.000462538	1.60284	0.000161504	3.39264	0.0529332	181.865	1.97904	359.918	0.000106956	182.102	1.97647	2166.73	47.6053	249.119	1.48244	0.692155	13770.8	5.32055	228.595	724.507	0.427857	0.466173	2.07379	3.16939
	0.310776	0.000250518	0.000115632	0.000453833	6.25167	0.000154249	3.75558	0.0792762	51.4241	2.19076	112.658	0.000102151	52.416	2.1493	2525.16	45.0684	75.2323	1.98905	0.667795	3997.68	2.79251	226.798	52.6946	0.430849	0.531152	2.15383	0.232341
	0.363246	0.000304367	0.000143799	0.000453449	3.48959	0.000137672	4.24363	0.0371837	104.385	2.47545	258.4	9.11732e-05	105.025	2.46038	2636.1	46.8925	181.481	1.80321	0.702324	8258.31	3.87107	277.435	180.088	0.403794	0.446672	2.20059	0.649117
	0.320719	0.000323572	0.000169648	0.000479543	2.15155	0.000172961	3.00325	0.044658	119.908	1.7519	210.067	0.000114543	120.189	1.7478	1990.18	45.8097	136.159	1.69467	0.64817	6006.8	4.21252	187.38	347.598	0.418009	0.37498	1.96396	1.85504
	0.296834	0.00033876	0.000168731	0.00037524	5.14203	0.000177913	3.63253	0.0385431	60.5508	2.11898	128.306	0.000117823	61.3478	2.09145	2491.83	45.9715	92.5921	1.55769	0.721653	4737.91	3.57328	228.247	76.0918	0.434034	0.440862	2.4174	0.333375
	0.302694	0.000293419	0.00020838	0.000547531	3.06873	0.000146026	3.24603	0.0416831	90.8224	1.89352	171.974	9.67061e-05	91.2535	1.88457	2208.15	47.0645	109.267	1.63707	0.63537	4079.22	3.18601	213.775	175.377	0.397334	0.376439	1.78787	0.82038
	0.259958	0.000209573	0.0002609	0.000516678	2.88897	0.000176669	3.75108	0.0520303	111.496	2.18813	243.967	0.000116999	111.965	2.17895	2708.1	46.7626	182.156	1.63433	0.746644	15093.3	4.97684	243.877	277.058	0.481313	0.737245	2.50092	1.13606
	0.325228	0.000301786	0.000218491	0.00038477	1.94932	0.000178683	3.01639	0.0978093	132.939	1.75956	233.913	0.000118333	133.194	1.75618	1985.62	47.588	160.469	1.3281	0.686017	8515.7	4.72443	203.095	438.911	0.431298	0.417342	2.03866	2.16111
	0.346982	0.000294528	0.000156857	0.000465843	0.539517	0.000145164	3.82001	0.0310689	608.499	2.22834	1355.94	9.61354e-05	608.589	2.22801	2433.56	47.119	935.056	1.72967	0.689598	43635.8	9.2651	252.159	6901.13	0.409903	0.440748	2.10121	27.3682
	0.318577	0.000243357	0.000162248	0.000454403	3.96459	0.00014603	3.48765	0.0446092	75.4839	2.03446	153.569	9.67084e-05	76.0791	2.01854	2318.47	47.055	100.963	1.68357	0.657441	4964.82	3.06262	229.595	118.557	0.4178	0.486156	1.91501	0.516376
	0.294189	0.000256588	0.000193695	0.000482986	5.13605	0.000158849	4.01339	0.0382151	66.9778	2.34114	156.805	0.000105198	67.8573	2.3108	2763.45	46.8506	114.54	1.60352	0.730466	6919.92	3.54842	261.914	85.8703	0.442293	0.574181	2.38473	0.327857
	0.315485	0.000261676	0.000191106	0.000435825	3.5803	0.000161583	4.39167	0.0618448	105.283	2.56181	269.715	0.000107008	105.961	2.54541	2932.68	47.5977	211.874	1.51739	0.785549	15085.6	4.90913	295.815	198.994	0.453911	0.630851	2.67204	0.672699
	0.283257	0.00027242	0.000235251	0.000408552	3.79827	0.000159912	3.38482	0.0476106	76.4763	1.97448	151.001	0.000105902	77.0303	1.96028	2366.74	48.2167	104.903	1.32886	0.694718	5231.39	3.41858	233.964	127.564	0.425038	0.461849	2.03653	0.54523
	0.356085	0.000284621	0.000183817	0.000418409	3.48843	0.000128588	3.39024	0.059033	83.4215	1.97764	164.978	8.51577e-05	83.9321	1.96561	2129.66	48.3984	103.304	1.50922	0.626169	3575.93	2.72791	236.108	134.826	0.378149	0.356426	1.64207	0.571034
	0.31668	0.000341558	0.000160864	0.000461057	0.727202	0.000160687	3.22595	0.0715503	381.236	1.88181	717.411	0.000106415	381.338	1.8813	2150.47	46.1273	468.228	1.73657	0.652663	18235.5	7.25739	204.076	3167.22	0.404731	0.355234	1.96395	15.5198
	0.317314	0.000277264	0.000152222	0.00045372	2.58394	0.000175322	3.84822	0.0111805	127.908	2.24479	287.126	0.000116107	128.339	2.23725	2562.91	46.0802	213.243	1.72894	0.74268	14437.4	5.34374	242.944	336.645	0.455886	0.567802	2.54826	1.38569
	0.32527	0.000278056	0.000169054	0.000465282	4.05562	0.000187595	3.37723	0.0240881	71.4482	1.97005	140.757	0.000124235	72.0374	1.95394	2223.01	45.6324	100.074	1.65906	0.71097	6736.07	3.917	209.086	120.258	0.458046	0.529102	2.38136	0.57516
	0.334138	0.000225134	0.000258637	0.000525261	4.34931	0.000172341	3.38855	0.0920581	66.8301	1.97665	132.1	0.000114133	67.4629	1.95812	2201.15	46.5569	91.9416	1.60179	0.695999	6675.45	3.44917	218.374	104.851	0.457992	0.601623	2.19239	0.480144
	0.324171	0.000276724	7.50478e-05	0.000482063	5.14714	0.000153887	3.88306	0.0631744	64.6623	2.26512	146.468	0.000101912	65.5151	2.23564	2560.13	43.0676	95.2149	2.71467	0.650074	4649.13	3.13418	214.137	79.6688	0.425967	0.498992	2.23508	0.372045
	0.339158	0.000212415	0.000172409	0.0004768	3.28624	0.000161664	3.32554	0.0319985	86.8762	1.9399	168.531	0.000107062	87.3486	1.92941	2143.94	46.5217	112.685	1.73835	0.668629	7600.13	3.58193	213.989	176.597	0.447981	0.589375	2.02642	0.825262
	0.318435	0.000261375	0.000136248	0.000487558	3.52221	0.000163582	3.58608	0.032143	87.3921	2.09188	182.814	0.000108333	87.9373	2.07891	2384.4	45.6211	125.162	1.89186	0.684642	7190.56	3.81983	221.907	162.29	0.438717	0.522212	2.20935	0.731343
	0.311473	0.000267098	0.000194825	0.000416305	0.723919	0.000179149	3.52904	0.0521412	418.945	2.05861	862.443	0.000118642	419.057	2.05806	2370.44	47.2929	637.344	1.46479	0.738998	43917.3	9.44	234.674	3948.05	0.457027	0.554038	2.39532	16.8235
	0.356793	0.000345055	0.000163263	0.00046828	4.1738	0.000154942	4.23886	0.0585752	87.1288	2.47267	215.441	0.000102611	87.8893	2.45127	2659.82	46.2718	158.102	1.73531	0.733852	7802.95	4.06639	269.836	129.755	0.417124	0.441787	2.46748	0.480866
	0.331455	0.000291184	0.000185635	0.00047335	4.58394	0.000166117	3.23593	0.0547765	60.5404	1.88762	114.278	0.000110011	61.1761	1.86801	2110.48	46.3115	75.868	1.59709	0.663892	3736.02	3.02006	206.345	83.2101	0.422961	0.427726	2.01598	0.403256
	0.37992	0.000320478	0.000135596	0.0005752	4.71244	0.000148862	3.81528	0.0550942	69.4246	2.22558	154.51	9.85838e-05	70.1944	2.20117	2307.95	44.9996	102.422	2.07914	0.662885	4540.22	3.1445	229.7	89.0476	0.405824	0.410373	2.12877	0.387669
	0.328642	0.000254108	0.000103319	0.000426546	1.94832	0.00016277	4.03996	0.030915	178.141	2.35665	419.816	0.000107795	178.484	2.35213	2645.96	45.3882	303.411	2.06902	0.722723	20373.4	5.91781	247.447	616.272	0.451687	0.604721	2.48729	2.49052
	0.328655	0.000372566	0.000229554	0.000431977	3.47876	0.000169727	3.78854	0.0425216	93.4819	2.20998	206.593	0.000112402	94.0509	2.19661	2481.25	47.327	153.635	1.39123	0.743657	7419.15	4.39102	252.295	168.645	0.420927	0.401642	2.42212	0.668443
	0.306023	0.000283785	0.000142928	0.000394048	3.91421	0.000160563	3.78666	0.0278567	83.0136	2.20888	183.367	0.000106333	83.6519	2.19203	2563.62	46.4583	130.06	1.68703	0.709286	6981.9	3.82199	242.996	136.532	0.431926	0.497786	2.28658	0.56187
	0.309025	0.000284401	0.00013994	0.000407297	3.88587	0.000161892	3.60735	0.0199466	79.6613	2.10429	167.63	0.000107213	80.265	2.08846	2431.66	46.1564	115.777	1.73222	0.690668	5994.4	3.63586	228.491	131.193	0.429358	0.477155	2.19656	0.574169
	0.311673	0.000345131	0.000193854	0.000432206	4.21569	0.000171173	2.96325	0.0831845	60.3015	1.72856	104.235	0.00011336	60.8383	1.71331	1989.82	46.2717	67.2164	1.51633	0.644856	2643.37	2.92917	188.633	86.9795	0.40808	0.341056	1.9053	0.461105
	0.298087	0.000364551	0.000200338	0.000441559	3.58585	0.000159972	4.1561	0.0224336	99.481	2.42439	241.181	0.000105942	100.124	2.40882	2845.91	47.1281	181.577	1.51546	0.752864	8311.56	4.49931	274.451	172.895	0.418027	0.424258	2.50347	0.629967
	0.325878	0.000191997	0.00017093	0.000452118	3.06043	0.000146257	3.79541	0.0536239	106.482	2.21399	235.75	9.68589e-05	106.985	2.20359	2496.02	47.3943	163.235	1.73903	0.692406	11379.2	3.90026	253.471	231.74	0.446605	0.673739	2.09382	0.914267
	0.352072	0.000243383	0.000204778	0.000465975	5.12402	0.00016662	3.00197	0.0588927	50.2169	1.75115	87.9374	0.000110344	50.8733	1.72856	1897.52	46.5305	56.5104	1.55155	0.642621	3205.06	2.61434	193.242	63.0288	0.431979	0.474963	1.87112	0.326166
	0.310708	0.000324114	0.00018174	0.000459902	2.31952	0.00019612	3.64433	0.00990998	134.957	2.12586	286.9	0.000129881	135.324	2.12009	2450.6	45.8232	218.156	1.60117	0.760388	14765.9	6.04612	227.513	401.43	0.462435	0.514895	2.70128	1.76443
	0.316888	0.000340653	0.000192043	0.000367306	0.393158	0.000166109	3.5979	0.0373002	786.483	2.09878	1650.65	0.000110006	786.545	2.09861	2397.69	47.5973	1193.75	1.42604	0.723197	57367	11.979	242.344	12567.1	0.420845	0.410726	2.26473	51.8564
	0.279686	0.000254068	0.000146548	0.000419409	4.83924	0.000160345	3.80623	0.0365148	67.4369	2.2203	149.73	0.000106189	68.2247	2.19466	2674.66	46.4092	106.081	1.69223	0.708479	6088.22	3.44702	243.737	91.4942	0.440869	0.55592	2.2862	0.375381
	0.323396	0.0002669	0.000122483	0.000345197	1.54167	0.000157149	3.74106	0.065137	208.503	2.18229	455.013	0.000104072	208.754	2.17966	2469.34	46.7308	320.25	1.73622	0.703826	18079.5	5.86987	242.895	873.84	0.432932	0.5151	2.22533	3.5976
	0.306039	0.000229263	0.000139331	0.000458036	3.68079	0.000160644	3.54633	0.07685	82.6902	2.06869	171.061	0.000106387	83.2531	2.05471	2400.86	46.1251	116.656	1.82166	0.681955	7227.6	3.6215	224.322	149.092	0.445188	0.577856	2.1444	0.664636
	0.293454	0.000243453	0.000161421	0.000362501	2.92229	0.000200926	3.52425	0.0927278	103.557	2.05581	212.894	0.000133064	104.003	2.047	2429.18	46.4523	163.215	1.49859	0.766647	14717.1	5.35781	226.099	260.009	0.491938	0.678074	2.67206	1.14998
	0.321863	0.000245942	0.000244958	0.000526751	5.15234	0.000130103	4.41482	0.0213735	73.4429	2.57531	189.138	8.61608e-05	74.4134	2.54173	2920.67	48.2403	135.023	1.57289	0.713886	6729.09	3.15546	305.457	87.312	0.411438	0.539661	2.14836	0.28584
	0.298068	0.000244608	0.00017959	0.000482572	2.10582	0.000168053	3.56639	0.0533261	145.487	2.08039	302.671	0.000111294	145.814	2.07574	2442.17	46.6885	214.784	1.66744	0.709629	13862	5.14066	231.136	464.931	0.451008	0.572385	2.26627	2.01151
	0.322471	0.000245794	0.000225639	0.000479264	2.9721	0.000129389	3.3556	0.0678195	96.9464	1.95744	189.766	8.56879e-05	97.3782	1.94876	2217.95	48.5861	119.143	1.51959	0.627843	4581.32	2.94783	235.512	189.799	0.390138	0.411738	1.63812	0.8059
	0.299829	0.000271553	8.48857e-05	0.000437272	4.02962	0.000191143	4.18252	0.05041	89.0575	2.4398	217.283	0.000126585	89.7826	2.4201	2856.89	43.2043	164.308	2.40465	0.756196	13287.5	5.11399	232.118	159.704	0.484876	0.683717	3.00527	0.68803
	0.354636	0.000256403	0.000195167	0.000394385	3.88379	0.000157058	3.95155	0.0378942	87.3093	2.30507	201.254	0.000104012	87.9703	2.28775	2487.85	48.0529	149.18	1.42595	0.741252	9845.67	4.00393	271.284	147.331	0.4397	0.562453	2.33433	0.543086
	0.318743	0.000211842	0.00021504	0.000517231	3.13535	0.000156424	3.85456	0.0186478	105.552	2.24849	237.334	0.000103592	106.075	2.23741	2561.75	47.0291	169.927	1.71336	0.715983	12240.5	4.25605	253.469	228.041	0.454221	0.663095	2.27374	0.899677
	0.314776	0.0001911	0.000187811	0.000497451	3.82324	0.000146082	3.42951	0.0468699	76.9785	2.00055	153.999	9.67433e-05	77.5434	1.98597	2292.54	46.8385	99.9812	1.8103	0.649232	6105.32	3.0488	223.695	131.217	0.437221	0.609325	1.88479	0.586591
	0.331044	0.00034868	0.000125972	0.000484326	2.52042	0.00013661	3.505	0.03961	119.44	2.04458	244.205	9.04703e-05	119.823	2.03804	2287.38	45.5773	151.134	2.07847	0.618883	4543.2	3.50538	216.473	266.739	0.377306	0.320486	1.80879	1.23221
	0.347389	0.000252514	0.000239404	0.000438604	3.6901	0.000162775	3.51111	0.0516628	81.6619	2.04815	167.256	0.000107798	82.2206	2.03423	2235.37	47.9188	118.684	1.39586	0.709595	7496.47	3.70129	239.703	144.717	0.438672	0.526308	2.15119	0.603732
	0.320439	0.000286386	0.000174077	0.000475846	2.84015	0.000173041	3.45785	0.0801162	104.55	2.01708	210.886	0.000114596	104.975	2.0089	2292.38	46.2592	148.017	1.65336	0.701881	8552.81	4.39415	219.999	241.759	0.44031	0.487186	2.25839	1.09891
	0.335708	0.000248809	0.000135159	0.000523599	3.08784	0.000196629	3.77953	0.0590531	105.094	2.20473	231.703	0.000130218	105.599	2.19418	2449.34	44.5937	174.653	1.97264	0.753781	16143.5	5.42384	223.462	249.34	0.491238	0.695974	2.80293	1.1158
	0.296508	0.000315663	0.000191861	0.000420515	2.84997	0.000189367	3.38404	0.0647734	101.965	1.97403	201.282	0.000125409	102.383	1.96597	2322.45	46.4134	146.69	1.48872	0.728778	8734.89	4.78714	216.74	240.023	0.449782	0.473365	2.41865	1.10742
	0.322851	0.000265801	0.000199817	0.000439519	4.16735	0.000156814	3.58968	0.0756518	73.8996	2.09398	154.744	0.00010385	74.5427	2.07592	2371.33	47.4764	107.87	1.49189	0.697087	5843.1	3.39944	240.564	113.01	0.427668	0.49156	2.11489	0.469774
	0.34955	0.000332525	0.000164552	0.000514456	1.86307	0.000150068	3.36457	0.0318397	155.153	1.96266	304.514	9.93827e-05	155.426	1.95922	2134.99	46.3009	196.74	1.78395	0.64608	7527.12	4.39345	214.45	492.443	0.396259	0.354884	1.91013	2.29631
	0.302001	0.000250483	0.000135282	0.000518895	5.28248	0.000162881	4.52099	0.0390282	73.3461	2.63725	193.432	0.000107868	74.3639	2.60115	3078.51	45.3864	147.056	1.96157	0.760247	10543.5	4.1227	276.887	95.221	0.460711	0.678885	2.7525	0.343898
	0.345541	0.000348511	0.000219229	0.000461812	4.85372	0.000141151	3.50116	0.0637593	61.8459	2.04234	126.311	9.34776e-05	62.5727	2.01862	2235.36	47.6564	82.688	1.45741	0.65464	2786.78	2.67903	236.413	72.4592	0.381856	0.328142	1.85111	0.306494
	0.313559	0.000325778	0.000191064	0.000552264	2.93725	0.000157309	3.88176	0.0316167	113.48	2.26436	256.96	0.000104178	113.974	2.25455	2599.46	46.5125	183.169	1.70014	0.712833	8587.52	4.44377	249.681	241.238	0.41865	0.436949	2.30412	0.966186
	0.300063	0.000424284	0.000131585	0.000550452	1.97088	0.000171856	3.66791	0.0353852	159.882	2.13961	342.086	0.000113812	160.197	2.13541	2504.55	43.6958	233.03	2.26089	0.681201	8757.56	5.47573	208.217	497.359	0.41087	0.34716	2.38418	2.38866
	0.305251	0.000213272	0.00012176	0.000449386	3.59815	0.000155222	3.79957	0.0277605	90.6353	2.21642	200.886	0.000102796	91.2252	2.20209	2575.22	46.0792	139.27	1.92934	0.693282	9264.26	3.82343	239.863	169.07	0.450218	0.643267	2.22064	0.704861
	0.297221	0.000330806	0.000104192	0.000540415	2.53638	0.000148381	3.30369	0.0689124	111.871	1.92715	215.592	9.82658e-05	112.234	1.92091	2265.01	44.1061	130.643	2.4043	0.605973	4239.72	3.53992	191.08	258.393	0.392704	0.345822	1.85173	1.35228
	0.360565	0.000313836	0.000151705	0.000369906	2.86729	0.00015909	4.02328	0.0227992	120.492	2.34691	282.785	0.000105358	120.992	2.33722	2509.74	46.9078	208.154	1.62369	0.736085	11630.8	4.7908	263.201	267.804	0.427262	0.475532	2.41566	1.01749
	0.30641	0.000337575	4.69574e-05	0.000431778	2.93149	0.000148869	3.62101	0.0268432	106.066	2.11226	224.038	9.85885e-05	106.525	2.10314	2450.1	40.2997	130.008	4.23401	0.580294	4213.88	3.5429	174.844	215.206	0.398795	0.372255	2.03406	1.23085
	0.343777	0.000316022	0.000181569	0.000522723	2.60063	0.00016712	3.19869	0.0492397	105.635	1.8659	197.105	0.000110675	105.996	1.85955	2047.74	46.0388	130.182	1.69729	0.660469	6069.79	3.97991	201.575	253.19	0.417849	0.394691	2.01896	1.25606
	0.321037	0.000303803	0.000221151	0.000320494	2.91175	0.000151095	4.19041	0.0686962	123.578	2.44441	302.075	0.000100063	124.107	2.434	2775.59	49.5288	233.491	1.21434	0.772955	12587.7	4.81899	305.626	267.447	0.4225	0.485868	2.38925	0.875079
	0.339908	0.000177063	6.08203e-05	0.000534262	4.09272	0.000170189	4.10084	0.0667634	85.9677	2.39215	205.648	0.000112708	86.6895	2.37224	2640.76	42.8132	143.965	2.9643	0.700057	14580.7	4.26218	223.483	155.373	0.496357	0.915167	2.6229	0.695234
	0.392133	0.000255039	0.000135255	0.000420908	2.01325	0.000137812	3.72297	0.00820368	158.865	2.17173	345.012	9.1266e-05	159.191	2.16729	2207.75	47.2956	229.491	1.76799	0.66517	11669.6	4.35753	247.599	481.06	0.408554	0.47004	1.94041	1.9429
	0.349645	0.00031672	0.000205918	0.000475559	2.89162	0.000169905	3.36315	0.0467601	99.8734	1.96184	195.935	0.00011252	100.295	1.9536	2133.77	46.8028	135.962	1.5198	0.693911	7039.91	4.13508	219.032	219.046	0.425205	0.420633	2.15641	1.00006
	0.346034	0.000263053	0.000172025	0.000457263	2.35079	0.000126263	4.33921	0.0198881	158.55	2.53121	401.324	8.36178e-05	158.993	2.52415	2768.33	48.5029	282.794	1.63372	0.704652	12983.2	4.43181	303.503	403.096	0.400591	0.48628	2.07054	1.32814
	0.308134	0.000243578	0.000161939	0.00045978	3.50037	0.000177115	3.48231	0.0738485	85.3941	2.03135	173.465	0.000117295	85.9203	2.01891	2350.4	46.0788	123.002	1.69587	0.709085	8590.08	4.09998	219.83	167.419	0.460293	0.589213	2.32308	0.761585
	0.298965	0.000288458	0.000159922	0.000485664	3.89183	0.000161412	2.98579	0.0479638	65.8341	1.74171	114.664	0.000106895	66.3345	1.72857	2041.97	45.8505	71.465	1.7437	0.623256	2938.81	2.84808	186.623	103.786	0.411636	0.38822	1.81265	0.556128
	0.310598	0.000357385	0.000221521	0.000434013	4.80548	0.000134357	3.39741	0.0267934	60.6186	1.98182	120.135	8.8978e-05	61.3171	1.95925	2284.93	48.0869	76.2752	1.41387	0.63491	2112.14	2.44919	233.571	69.2288	0.368502	0.295633	1.71018	0.296393
	0.314429	0.000260431	0.000136127	0.000415135	4.72127	0.000139853	2.66893	0.0311828	48.4738	1.55687	75.4676	9.26179e-05	49.0132	1.53974	1785.01	46.3654	41.7855	1.75359	0.553688	1311.43	1.88693	170.586	58.3738	0.381731	0.331868	1.39898	0.342196
	0.345858	0.000305618	0.000184498	0.000452284	3.00871	0.000184569	3.11394	0.0613971	88.8677	1.81646	161.425	0.000122231	89.2733	1.80821	1987.16	46.0691	110.559	1.56819	0.684897	6339.16	4.05068	196.493	193.586	0.439453	0.438297	2.1682	0.985207
	0.315885	0.000297086	7.26699e-05	0.000394009	2.60714	0.000171692	4.18032	0.0356875	137.708	2.43852	335.803	0.000113703	138.181	2.43018	2789.91	42.9939	239.992	2.7072	0.714681	14707.2	5.55161	229.743	356.437	0.452368	0.563695	2.71069	1.55146
	0.326306	0.000279462	0.000147269	0.000390343	4.11065	0.000182303	3.83492	0.0364728	80.0414	2.23704	179.056	0.000120731	80.7193	2.21825	2520.41	45.9828	134.74	1.6472	0.752505	9761.84	4.41686	241.083	134.247	0.462645	0.580793	2.62722	0.556849
	0.296025	0.000298799	0.000160308	0.000378035	5.22658	0.00016164	3.46316	0.0657609	56.7886	2.02017	114.723	0.000107046	57.5604	1.99309	2378.38	46.517	77.949	1.56455	0.679454	3593.64	2.97869	222.799	67.9502	0.420104	0.432748	2.09299	0.304985
	0.310143	0.00026784	0.000143801	0.000445529	2.95029	0.000153711	3.41467	0.0357285	99.3835	1.99189	197.961	0.000101795	99.8197	1.98318	2298.05	46.4506	130.652	1.763	0.659989	6217.68	3.66719	219.053	210.743	0.41946	0.456804	1.98043	0.962065
	0.33798	0.000265823	0.000187094	0.000495791	1.56809	0.000128929	3.54087	0.0330283	194.019	2.06551	400.748	8.53835e-05	194.261	2.06294	2286.83	48.124	255.955	1.64296	0.638693	9727.4	4.3053	243.81	716.746	0.388154	0.401591	1.72794	2.93977
	0.303181	0.000266634	0.000173532	0.000467451	5.04815	0.000151241	3.17303	0.0620532	53.8802	1.85093	99.7285	0.000100159	54.5642	1.82773	2156.98	46.5656	62.8327	1.64483	0.630037	2637.99	2.50226	204.56	64.9486	0.408698	0.416106	1.79586	0.317504
	0.336639	0.000325582	0.000201816	0.000415583	3.35587	0.000132987	4.0171	0.0145487	102.76	2.34331	240.798	8.8071e-05	103.342	2.3301	2599.65	48.6282	167.744	1.44485	0.696614	6279.88	3.59504	282.428	176.865	0.387368	0.382	2.01315	0.626231
	0.29302	0.000353718	0.000165276	0.00041939	3.00493	0.000164146	3.58182	0.0325054	102.349	2.08939	213.848	0.000108706	102.815	2.07993	2470.37	46.2293	148.653	1.66291	0.695134	6220.88	4.17723	227.592	210.263	0.413918	0.387401	2.21805	0.923862
	0.330159	0.000224414	0.000177121	0.000539519	2.18901	0.00014491	4.11213	0.0483214	161.369	2.39874	387.083	9.59667e-05	161.76	2.39294	2687.14	47.0408	275.933	1.83557	0.712854	17563.9	5.02424	270.541	482.147	0.438351	0.620181	2.25279	1.78216
	0.311314	0.000317367	0.000130802	0.000372545	2.558	0.000174072	3.65933	0.0792278	122.865	2.13461	262.268	0.00011528	123.271	2.12758	2458.53	45.5767	187.201	1.80009	0.713776	10178.1	4.97113	225.998	313.652	0.437736	0.468374	2.40607	1.38785
	0.287837	0.000288553	0.000162653	0.000460604	3.69501	0.000171599	3.59765	0.0428789	83.5631	2.09863	175.368	0.000113642	84.1363	2.08433	2499.48	46.0723	124.349	1.68514	0.709074	6895.88	3.99398	227.047	148.566	0.440683	0.497501	2.32366	0.654342
	0.286645	0.000189329	0.000208898	0.000438626	2.56815	0.000152666	3.9408	0.0565897	131.792	2.2988	302.963	0.000101103	132.231	2.29117	2742.47	47.8884	220.816	1.61153	0.728854	16909.1	4.73508	268.697	353.176	0.461336	0.741514	2.27243	1.31441
	0.346803	0.000314278	0.000186496	0.000461358	4.83162	0.000137579	3.65737	0.0385613	64.9021	2.13347	138.466	9.11121e-05	65.658	2.1089	2330.58	47.4	90.9786	1.57658	0.657044	3363.42	2.73901	244.311	77.6714	0.388265	0.37054	1.88496	0.31792
	0.350907	0.00028183	0.000146851	0.000483692	2.12527	0.000131089	3.77485	0.0352152	152.581	2.202	335.983	8.68137e-05	152.929	2.19698	2390.34	47.219	219.099	1.81771	0.652115	8644.06	4.05002	250.237	419.516	0.39162	0.410151	1.87104	1.67647
	0.322565	0.000304468	0.000199191	0.000464729	4.45059	0.000132504	4.04488	0.0367555	77.9521	2.35952	183.929	8.7751e-05	78.7244	2.33637	2673.16	48.1105	126.703	1.52744	0.688869	4871.08	3.11311	278.358	102.182	0.3916	0.408102	2.01123	0.36709
	0.316575	0.000281573	0.000244419	0.000420004	2.08493	0.000144341	3.71821	0.0181126	153.202	2.16895	332.288	9.55903e-05	153.539	2.16419	2479	49.1509	234.91	1.32182	0.706947	10953.7	4.61756	267.064	449.305	0.409791	0.445281	2.02945	1.68239
	0.339395	0.000344673	0.00022151	0.000463873	4.11303	0.000163729	3.93791	0.0542344	82.143	2.29711	188.692	0.000108429	82.8395	2.2778	2537.81	47.2417	140.091	1.45093	0.742432	7141.2	4.04483	261.297	125.793	0.422665	0.434282	2.42288	0.481416
	0.320924	0.000324098	0.000130142	0.000389037	1.98011	0.000159786	4.09441	0.0342665	177.64	2.3884	424.277	0.000105818	177.993	2.38367	2712.45	46.0141	310.059	1.84535	0.730794	15976.8	5.8726	257.745	572.153	0.427402	0.47168	2.47444	2.21984
	0.330253	0.000307836	0.000172167	0.000350981	3.64846	0.000135401	3.74697	0.0504853	88.145	2.18573	192.662	8.96695e-05	88.7347	2.17121	2448.18	48.3585	129.999	1.46408	0.674754	4892.39	3.22228	260.521	140.323	0.389611	0.383304	1.90992	0.538624
	0.264378	0.000310419	0.000255326	0.00043894	5.248	0.000147939	3.55884	0.0214965	58.1181	2.07599	120.652	9.79726e-05	58.9143	2.04793	2553.96	48.2868	82.523	1.3149	0.683973	3130.82	2.80505	246.708	66.1076	0.401009	0.391731	1.96829	0.267959
	0.351949	0.000256042	0.000159812	0.000376629	4.63847	0.000115936	3.57862	0.0529973	66.1614	2.08753	138.114	7.67788e-05	66.8725	2.06533	2262.44	48.8147	84.8991	1.53656	0.614704	2783.58	2.22967	253.533	78.5852	0.369883	0.375349	1.55561	0.30996
	0.30117	0.000210654	0.000233953	0.000413661	5.37888	0.000162291	4.26805	0.0479099	67.9944	2.48969	169.285	0.000107478	68.9719	2.45441	2909.73	47.8932	131.682	1.43206	0.777868	11078.5	3.88712	291.068	88.5268	0.470516	0.758945	2.58782	0.304145
	0.328503	0.000277979	0.000126065	0.000444866	2.42037	0.000175829	3.47037	0.0652063	123.154	2.02438	249.312	0.000116443	123.519	2.01841	2273.38	45.2425	172.922	1.9027	0.693597	10581.2	4.82598	211.197	339.374	0.447065	0.51242	2.30563	1.60691
	0.326167	0.000297367	0.000197056	0.000470207	2.06724	0.000168481	3.26273	0.0323545	135.587	1.90326	258.056	0.000111577	135.88	1.89915	2144.79	46.8656	176.05	1.54514	0.682214	8987.8	4.66593	213.062	417.536	0.426638	0.431873	2.07875	1.95969
	0.34538	0.000275906	0.000162788	0.000452508	5.15687	0.000183623	3.87074	0.0584227	64.3348	2.25793	145.263	0.000121604	65.1864	2.22843	2471.92	45.663	109.193	1.66748	0.75169	8306.88	4.00493	239.961	86.4155	0.465275	0.595255	2.65838	0.360123
	0.326079	0.000257925	0.000168312	0.000451012	1.45291	0.000149668	3.42705	0.0187751	202.677	1.99911	405.173	9.91177e-05	202.893	1.99698	2253.1	47.3479	269.901	1.64052	0.666136	13330.8	5.13217	228.423	870.327	0.418035	0.465101	1.94175	3.81015
	0.33865	0.00025988	0.000208528	0.000442923	3.61376	0.000195728	2.93492	0.042496	69.7065	1.71203	119.34	0.000129621	70.1641	1.70087	1893.56	46.2633	81.9777	1.4753	0.686926	5796.3	3.69889	186.761	132.709	0.461494	0.51415	2.1628	0.710582
	0.342196	0.000261605	0.000199671	0.000423461	5.78258	0.000154882	4.26709	0.043061	63.2043	2.48914	157.324	0.000102571	64.2513	2.44858	2738.3	47.5642	118.589	1.46444	0.753788	7685.11	3.52042	287.019	71.4941	0.439669	0.581845	2.46381	0.249092
	0.342092	0.000326872	0.000294741	0.000467274	2.71153	0.000177595	3.3184	0.0447559	105.1	1.93573	203.446	0.000117612	105.49	1.92857	2129.83	47.9017	146.772	1.26927	0.721432	8039.43	4.49079	226.385	249.16	0.430939	0.420559	2.22514	1.1006
	0.346373	0.00027967	0.000224355	0.000434131	1.55746	0.000171652	3.28084	0.1042	180.998	1.91382	346.398	0.000113677	181.22	1.91147	2092.03	47.656	243.34	1.39942	0.702487	14480.3	5.58891	221.533	757.299	0.436638	0.470881	2.13162	3.41845
	0.309571	0.000265498	0.000103847	0.000366929	4.04778	0.000155333	3.45297	0.0635641	73.1924	2.01423	147.427	0.00010287	73.7937	1.99782	2325.75	45.4275	96.01	1.96933	0.651239	4616.08	3.17682	211.86	113.868	0.422549	0.469135	2.0161	0.537466
	0.321433	0.000266011	0.000159706	0.00045729	1.69711	0.000155233	3.26974	0.0387206	165.535	1.90735	315.733	0.000102803	165.776	1.90457	2164.5	46.7964	206.744	1.69235	0.654808	9967.17	4.65877	212.891	610.018	0.419076	0.446087	1.92076	2.86541
	0.335156	0.0002359	0.000160771	0.000497511	3.9607	0.00016923	3.21207	0.036873	69.5879	1.87371	130.387	0.000112073	70.1356	1.85908	2083.32	45.7759	86.1531	1.78815	0.660747	5390.09	3.27857	200.113	116.576	0.445188	0.535287	2.04393	0.582551
	0.326813	0.000338418	0.000224248	0.000480672	2.16263	0.000164264	3.39255	0.0301574	134.757	1.97899	266.683	0.000108784	135.076	1.97432	2227.99	47.2691	184.742	1.46474	0.692738	8266.46	4.66012	225.372	384.619	0.413684	0.384633	2.10694	1.7066
	0.374005	0.000367827	0.00013539	0.000410754	2.35436	0.000163278	3.57447	0.0475637	130.409	2.08511	271.918	0.000108131	130.775	2.07928	2182.91	45.2408	184.459	1.91675	0.678364	8129.41	4.6286	217.515	338.652	0.409794	0.370457	2.20564	1.55691
	0.352285	0.000264418	0.000216722	0.00045985	4.38482	0.000137758	3.99913	0.0609147	78.2309	2.33282	182.499	9.12302e-05	78.9836	2.31059	2526.98	48.3436	128.095	1.47959	0.701892	6372.04	3.25426	277.883	108.939	0.409835	0.483156	2.06791	0.392033
	0.370783	0.000274315	0.000182897	0.000462576	0.174088	0.00017329	3.97151	0.0264453	1960.65	2.31671	4542.26	0.000114762	1960.68	2.31668	2437.86	46.9693	3478.71	1.59306	0.765853	267225	21.3331	260.496	76974.6	0.457847	0.587394	2.60814	295.492
	0.378479	0.000313676	0.000163881	0.000469139	2.54921	0.000122159	3.83486	0.0601376	129.203	2.237	289.026	8.08999e-05	129.627	2.22968	2325.18	47.9076	185.967	1.70483	0.643427	6149.81	3.47708	261.683	280.528	0.371022	0.348518	1.76954	1.07202
	0.311373	0.000299931	0.000204219	0.000459659	3.65824	0.00013104	3.45034	0.0530242	80.9492	2.0127	162.926	8.67813e-05	81.4936	1.99925	2317.92	48.2625	103.573	1.50061	0.635707	3348.91	2.78354	238.946	125.014	0.378974	0.350581	1.70201	0.523188
	0.34238	0.000304005	0.000192941	0.000432633	3.9226	0.000145391	4.42588	0.0563007	96.8188	2.58176	249.963	9.62852e-05	97.5664	2.56198	2839.4	47.9918	188.413	1.49937	0.753763	9863.22	4.16546	303.076	153.858	0.418232	0.49178	2.41994	0.507656
	0.303371	0.000346619	0.000223363	0.000443297	2.19146	0.000176101	3.54643	0.0414452	139.014	2.06875	287.586	0.000116623	139.352	2.06374	2410.15	47.1881	210.533	1.41537	0.732069	10658.9	5.33326	234.787	407.051	0.430068	0.420826	2.36106	1.7337
	0.297476	0.000323391	0.00016171	0.000440621	2.31797	0.000134386	3.88176	0.0697691	143.846	2.26436	325.72	8.89975e-05	144.237	2.25823	2660.37	47.5103	219.384	1.68116	0.673536	7571.65	4.15459	260.509	359.083	0.387832	0.376646	1.97158	1.37839
	0.339809	0.000280458	0.000184766	0.000437784	5.08147	0.000147948	3.76822	0.0751925	63.5653	2.19813	139.725	9.79785e-05	64.3827	2.17022	2426.93	47.3372	96.4477	1.53944	0.690271	4692.61	3.03267	251.049	77.1286	0.414122	0.459497	2.08595	0.307226
	0.304195	0.000300194	0.000188368	0.000449676	4.78572	0.000150004	3.52248	0.0607335	63.1107	2.05478	129.679	9.93407e-05	63.8321	2.03156	2391.04	47.1164	86.7997	1.5458	0.669345	3590.79	2.91699	232.493	79.7647	0.406134	0.407447	1.97982	0.343084
	0.292279	0.000340139	0.000222163	0.000421177	2.25848	0.00014517	3.94912	0.0276994	150.201	2.30365	346.011	9.61391e-05	150.588	2.29773	2726.55	48.5542	249.698	1.38464	0.721649	9870.62	4.78802	276.804	397.349	0.400445	0.393602	2.16704	1.43549
	0.307797	0.000284312	0.000247224	0.000476938	5.53418	0.000153357	3.56216	0.0425225	55.1468	2.07793	114.591	0.000101561	55.9851	2.04681	2405.46	47.5873	78.6219	1.41377	0.68611	3657.87	2.83823	239.835	61.5838	0.415293	0.443125	2.03927	0.256775
	0.296424	0.000199985	0.00020119	0.000433325	3.01382	0.000150105	3.7846	0.025446	107.824	2.20768	238.041	9.94076e-05	108.318	2.19762	2597.66	47.9351	168.652	1.5804	0.708499	11491.7	4.06877	258.55	239.332	0.448545	0.662049	2.14309	0.925671
	0.361129	0.000256687	0.000139657	0.000483176	6.39539	0.000159019	3.49423	0.0774965	46.7616	2.0383	95.3141	0.00010531	47.7042	1.99802	2177.79	45.2349	62.5411	1.86017	0.656158	3466.87	2.62484	212.577	46.6214	0.428919	0.496802	2.06414	0.219316
	0.337086	0.000253782	0.000144676	0.00046849	3.98187	0.000147857	3.49181	0.0216379	75.2449	2.03689	153.265	9.79184e-05	75.8433	2.02082	2258.18	46.4296	100.1	1.80009	0.653116	4913.24	3.08766	223.799	117.436	0.416979	0.472548	1.94115	0.524738
	0.278265	0.000298359	0.000201007	0.000481991	2.07046	0.000172666	2.90219	0.00975064	120.416	1.69294	203.857	0.000114348	120.677	1.68928	2043.41	46.5515	131.894	1.5499	0.646992	5814.37	4.13895	186.986	365.889	0.421624	0.392381	1.89496	1.95677
	0.315682	0.000167023	0.0001281	0.000352997	3.87761	0.000148892	3.78855	0.0401956	83.8416	2.20999	185.289	9.86041e-05	84.4743	2.19344	2529.2	47.4863	129.398	1.70865	0.698359	10528.2	3.53515	253.997	149.062	0.462528	0.784804	2.12172	0.586865
	0.312266	0.000322889	0.000195395	0.000496449	2.33837	0.00015467	3.76324	0.0138141	138.236	2.19522	303.458	0.000102431	138.618	2.18917	2524.84	47.1266	214.151	1.59501	0.705702	9631.5	4.72431	248.492	364.808	0.413619	0.420893	2.19977	1.46809
	0.325387	0.000204813	0.000152679	0.000501491	3.9052	0.000152557	3.40017	0.0542027	74.7133	1.98343	148.189	0.000101031	75.2851	1.96837	2237.72	46.1527	96.4479	1.895	0.650846	5943.25	3.12716	215.334	125.419	0.439829	0.588462	1.95088	0.582439
	0.373193	0.000247091	0.000217521	0.000389563	2.43072	0.000181585	3.97283	0.0131903	140.384	2.31748	325.338	0.000120255	140.803	2.31058	2429.32	47.9478	260.025	1.35627	0.799247	24812.4	6.11166	271.553	411.773	0.4779	0.68153	2.7258	1.51636
	0.306692	0.000240517	0.000141235	0.00051587	2.66994	0.000153474	4.07978	0.00148342	131.23	2.37987	312.311	0.000101638	131.703	2.37134	2759.4	46.2301	224.149	1.9239	0.717713	14034	4.79596	259.241	325.496	0.443947	0.607326	2.3644	1.25557
	0.330419	0.000249017	0.000171008	0.000413286	5.69696	0.000143283	3.78088	0.0698309	56.8498	2.20551	125.383	9.48892e-05	57.7644	2.17059	2469.72	47.4282	85.3437	1.55792	0.680665	4320.13	2.76281	252.862	61.908	0.416965	0.501281	2.02052	0.24483
	0.341188	0.000265374	0.0002063	0.000466973	5.12094	0.000138747	4.05404	0.0274645	67.8569	2.36486	160.472	9.18857e-05	68.7428	2.33438	2605.57	47.9275	112.64	1.52301	0.70193	5558.17	3.07356	276.869	81.1671	0.411431	0.489865	2.10421	0.29316
	0.382561	0.000316997	0.000135061	0.000430955	3.37462	0.000195007	3.30553	0.0294587	84.0867	1.92823	162.138	0.000129144	84.5686	1.91724	1991.07	44.553	113.667	1.85328	0.701053	7611.02	4.33949	195.08	168.505	0.453541	0.473379	2.42894	0.863776
	0.324065	0.000343633	8.90986e-05	0.000440561	1.14813	0.00014729	3.85502	0.0368452	288.531	2.24876	648.837	9.75429e-05	288.724	2.24726	2542.04	43.938	422.085	2.56942	0.650526	15784.7	6.31602	221.271	1504.06	0.40098	0.386607	2.15039	6.79737
	0.333582	0.000212444	0.00018622	0.000457552	3.70921	0.000156588	3.73939	0.0613556	86.5219	2.18131	188.731	0.000103701	87.1199	2.16634	2431.08	47.1813	133.465	1.64729	0.707169	9521.02	3.77583	247.49	156.829	0.451014	0.640883	2.20382	0.633676
	0.317811	0.000322612	8.85898e-05	0.000397525	1.74675	0.000140276	3.69946	0.0678993	181.964	2.15802	392.682	9.28982e-05	182.245	2.15469	2462.04	44.5426	247.464	2.43692	0.63019	8603.45	4.60587	218.226	610.747	0.392866	0.376035	1.96363	2.79869
	0.347674	0.00017785	0.000167215	0.000389271	2.63299	0.000139374	4.40608	0.0616957	143.718	2.57021	369.386	9.23004e-05	144.221	2.56125	2803.94	48.5424	275.695	1.62618	0.74636	23206.8	4.83021	308.683	371.605	0.45638	0.805598	2.31913	1.20384
	0.359357	0.000224986	0.000197234	0.000437661	1.33438	0.000143556	4.1441	0.0574435	266.861	2.41739	645.108	9.50699e-05	267.102	2.41521	2589.99	48.5041	474.144	1.54299	0.734983	32196.5	6.52449	289.871	1304.64	0.437084	0.618527	2.25251	4.50074
	0.337361	0.000275419	0.000195961	0.000490712	3.40127	0.000172044	3.65006	0.0119359	92.1218	2.1292	196.146	0.000113936	92.6581	2.11688	2359.55	46.6058	141.97	1.59359	0.723799	9164.45	4.27867	235.72	180.478	0.446905	0.530738	2.36606	0.765645
	0.345766	0.00037512	0.000158387	0.000453508	1.98152	0.0001613	3.53606	0.057377	153.307	2.0627	316.225	0.000106821	153.611	2.05861	2256.86	45.8059	214.799	1.78867	0.679261	8695.97	4.93425	220.587	467.559	0.404996	0.355285	2.15725	2.11962
	0.315685	0.000282935	0.00023206	0.000371531	4.45426	0.00018634	3.45937	0.0558388	66.6131	2.01797	134.423	0.000123404	67.2741	1.99814	2309.43	47.6191	100.516	1.26618	0.747755	6891.46	3.89937	233.227	101.759	0.456738	0.528184	2.41894	0.436308
	0.338428	0.00029933	0.000259165	0.000557916	3.91458	0.000163853	3.54498	0.0304271	77.7082	2.06791	160.693	0.000108512	78.3057	2.05213	2287.93	47.0257	112.765	1.50943	0.701739	5940.93	3.63172	233.078	126.053	0.426041	0.450866	2.18449	0.54082
	0.366047	0.000268827	0.000180088	0.000456625	2.85287	0.000147531	4.13115	0.0501736	124.35	2.40984	299.663	9.77024e-05	124.86	2.39999	2554.94	47.6878	218.825	1.59567	0.730238	12925.7	4.55514	279.321	277.375	0.426645	0.528636	2.30029	0.993031
	0.342751	0.000308376	0.000196632	0.000438412	4.76733	0.000156818	3.67432	0.0155516	66.0865	2.14336	141.647	0.000103853	66.8361	2.11932	2355.91	47.1614	99.1059	1.49499	0.699669	4822.24	3.25848	242.979	85.999	0.416546	0.432562	2.15915	0.353937
	0.317764	0.000311475	0.000253261	0.000410814	2.77195	0.000137838	3.60591	0.0341714	111.713	2.10345	234.982	9.12836e-05	112.146	2.09532	2399.94	49.42	160.605	1.27439	0.683478	6010.36	3.64603	261.842	234.279	0.389725	0.372165	1.87634	0.894736
	0.32358	0.000215864	0.000201011	0.000347847	4.35142	0.000167362	4.14193	0.107238	81.6489	2.41613	197.274	0.000110836	82.4226	2.39345	2733.2	48.3905	155.483	1.34265	0.788155	13885.9	4.35581	288.364	132.453	0.473784	0.7448	2.60239	0.459325
	0.331574	0.00030918	0.000163745	0.000457664	3.81481	0.000149256	3.91409	0.0366738	88.05	2.28322	201.037	9.88447e-05	88.6934	2.26666	2552.33	46.7969	140.82	1.68421	0.700465	6486.17	3.69686	254.848	141.8	0.412158	0.439182	2.1979	0.556408
	0.308508	0.000305416	9.43787e-05	0.00048332	3.99743	0.000180137	3.37769	0.0357609	72.5016	1.97032	142.852	0.000119296	73.0827	1.95466	2278.55	43.067	93.9458	2.40929	0.657647	4891.46	3.64428	186.264	119.088	0.440564	0.462721	2.28752	0.63935
	0.349966	0.000299589	0.000158618	0.000353108	0.87977	0.000177994	3.1914	0.0895087	311.739	1.86165	580.349	0.000117877	311.862	1.86092	2023.81	46.6804	401.238	1.53369	0.691373	23000.2	7.44181	206.76	2307.76	0.436319	0.443758	2.15192	11.1615
	0.352919	0.00019422	0.00018215	0.000507414	2.91201	0.000135489	2.96231	0.0532403	87.3528	1.72801	150.947	8.9728e-05	87.7264	1.72065	1870	47.0372	88.222	1.83942	0.584457	4214.09	2.65622	194.864	182.64	0.408214	0.481774	1.51457	0.937268
	0.348675	0.000340585	8.12549e-05	0.000477196	6.04853	0.000124255	3.28102	0.0856484	46.4467	1.91393	88.8955	8.22882e-05	47.2866	1.87993	2084.77	43.2049	47.7696	2.79634	0.537369	1076.31	1.79251	182.092	40.4484	0.354175	0.275277	1.51757	0.222131
	0.347975	0.000294359	0.000132578	0.000512242	2.08447	0.000162148	3.59326	0.0311265	148.086	2.09607	310.399	0.000107383	148.412	2.09147	2285.62	45.3665	211.032	1.98023	0.679875	11105.9	4.91652	219.876	453.232	0.42756	0.462409	2.20321	2.06131
	0.327134	0.000244343	0.000199052	0.000518281	4.39408	0.000145317	3.97105	0.0425718	77.5174	2.31645	179.565	9.62363e-05	78.2663	2.29428	2606.67	47.2088	125.962	1.67433	0.701482	7042.46	3.40413	263.13	112.234	0.427019	0.54765	2.16598	0.426533
	0.367686	0.000265954	0.00018759	0.00057337	3.56453	0.000185747	3.93801	0.0689988	94.826	2.29717	217.832	0.000123011	95.4317	2.28259	2429.19	45.4883	166.038	1.78682	0.762229	14261.3	4.99568	242.267	188.247	0.474643	0.639854	2.75449	0.777024
	0.33738	0.000250181	0.00018232	0.000394289	1.01199	0.000144062	3.65525	0.0389154	310.391	2.13223	661.824	9.54054e-05	310.552	2.13112	2362.83	48.534	458.014	1.47411	0.692048	24053.4	6.43518	255.992	1914.15	0.41811	0.492542	1.99457	7.47737
	0.335948	0.000215498	0.000261473	0.000457844	2.51884	0.000156164	3.84418	0.0404298	131.08	2.24244	293.939	0.00010342	131.5	2.23527	2490.33	48.2447	215.612	1.47438	0.733527	16027.6	4.78617	266.024	351.251	0.452442	0.65014	2.26779	1.32037
	0.344807	0.000295025	0.000188036	0.000551333	2.16413	0.000153855	3.40553	0.0629618	135.179	1.98656	268.541	0.00010189	135.499	1.98187	2176.74	46.5975	177.819	1.71887	0.662165	8140.79	4.28223	219.851	383.811	0.411815	0.414825	1.98097	1.74578
	0.354775	0.000186174	0.00025938	0.000413692	2.17605	0.000135198	3.4943	0.0452632	137.942	2.03834	281.173	8.95353e-05	138.272	2.03347	2199.5	49.1623	186.519	1.46992	0.663359	11485.6	3.85393	251.098	402.407	0.425451	0.592691	1.78608	1.60259
	0.33104	0.000334241	0.000125167	0.000397521	3.67956	0.000160976	3.78797	0.0330644	88.3541	2.20965	195.231	0.000106607	88.9551	2.19472	2472.06	45.2792	135.217	1.92984	0.692597	6276.44	3.90703	230.899	149.9	0.418768	0.424247	2.29526	0.649203
	0.322612	0.000314222	0.000150627	0.000487735	3.28626	0.000147556	3.02236	0.0670141	78.9551	1.76304	139.201	9.77189e-05	79.3844	1.75351	1997.26	46.001	83.8209	1.81915	0.602157	2791.23	2.8197	190.151	139.096	0.388255	0.330495	1.68095	0.731507
	0.334637	0.000285221	0.000203784	0.000411631	4.48847	0.000193463	4.05115	0.0198486	77.4112	2.36317	182.936	0.000128121	78.191	2.3396	2629.6	46.744	148.049	1.42141	0.809294	12828	4.91327	263.177	123.2	0.479509	0.636936	2.94056	0.468125
	0.299927	0.000287164	0.000288397	0.000484074	3.55461	0.000163049	3.64217	0.0436053	87.9478	2.1246	186.854	0.00010798	88.5065	2.11119	2487.46	48.1164	135.747	1.34072	0.726487	7352.78	3.96511	250.706	159.037	0.431147	0.481121	2.23634	0.634356
	0.310215	0.000203567	0.000261617	0.00034562	3.20247	0.000139803	3.86464	0.0346603	103.606	2.25437	233.567	9.25846e-05	104.141	2.24279	2600.61	50.2224	169.033	1.23796	0.723704	10698.4	3.79378	289.816	208.91	0.433027	0.618209	2.03702	0.720837
	0.297078	0.000320849	0.000154226	0.000413327	3.40619	0.000188922	3.57949	0.0722934	90.2099	2.08804	188.362	0.000125114	90.7366	2.07592	2454.6	45.486	138.079	1.68431	0.733055	8324.05	4.6336	220.189	178.668	0.452457	0.490604	2.54792	0.811433
	0.358844	0.000236216	0.000276492	0.000534645	2.37331	0.000140038	4.06664	0.0363826	147.179	2.37221	349.139	9.27405e-05	147.598	2.36547	2543.62	48.3667	250.114	1.55885	0.716374	14992.5	4.6226	282.843	393.664	0.425487	0.562852	2.15207	1.39181
	0.32921	0.000189147	0.000218866	0.000429138	5.55961	0.00014213	4.26327	0.0639875	65.697	2.48691	163.382	9.41258e-05	66.7047	2.44934	2789.85	48.0119	119.106	1.56651	0.729	8912.34	3.2376	292.186	79.0595	0.449595	0.738708	2.26165	0.27058
	0.348808	0.00014216	0.000123649	0.000447826	1.8713	0.000156755	3.29412	0.0363935	151.235	1.92157	290.609	0.000103811	151.504	1.91817	2092.66	45.8036	187.834	2.14993	0.646347	17743.4	4.48416	205.474	576.456	0.477985	0.848926	1.95344	2.8055
	0.361244	0.000259983	0.000115105	0.000495074	3.94326	0.000141685	3.75948	0.0254351	81.8086	2.19303	179.409	9.38314e-05	82.4469	2.17605	2342.69	45.6482	117.024	2.08145	0.652278	5657.85	3.19915	232.912	127.486	0.412294	0.475979	2.00302	0.547354
	0.321402	0.000177097	0.000120399	0.000255154	5.24127	0.00018137	3.94971	0.0575034	64.5846	2.304	148.803	0.000120113	65.4671	2.27294	2614.75	47.3451	116.406	1.45584	0.782281	13725.8	4.08436	263.228	93.0417	0.507226	0.93429	2.67821	0.353464
	0.330268	0.000292876	0.000109175	0.000443704	5.40411	0.000151378	4.12319	0.0325713	65.378	2.40519	157.247	0.00010025	66.3266	2.37079	2693.93	44.9101	108.871	2.09881	0.692361	5416.54	3.29678	247.251	76.0716	0.422482	0.491826	2.33156	0.30767
	0.325342	0.000340565	0.000195118	0.000475871	2.2999	0.00015946	3.35149	0.0229022	125.173	1.95503	244.717	0.000105603	125.507	1.94982	2205.84	46.8536	164.528	1.57137	0.672321	6731.69	4.26916	218.746	329.695	0.406021	0.366425	2.01994	1.5072
	0.339616	0.000184306	0.000201537	0.000411607	2.4053	0.000189865	3.92919	0.0316229	140.311	2.29203	321.598	0.000125738	140.722	2.28535	2531.35	46.9697	256.059	1.57389	0.796209	32936.8	6.3414	257.725	449.989	0.517054	0.944919	2.81895	1.74601
	0.309161	0.000295055	0.000211883	0.000559932	4.42594	0.000168077	3.68396	0.0218378	71.3935	2.14898	153.423	0.000111309	72.0931	2.12812	2482.81	46.2203	109.141	1.64513	0.711373	5978.7	3.66499	233.991	104.689	0.435627	0.486565	2.32379	0.447404
	0.28524	0.000269611	0.000157138	0.00041308	3.40564	0.000137425	3.23823	0.0380602	81.6225	1.88897	154.182	9.10101e-05	82.0989	1.878	2257.98	47.5051	95.7563	1.62395	0.62106	3377.53	2.80686	217.273	139.951	0.391633	0.384206	1.6767	0.644124
	0.342362	0.000362521	0.000213391	0.000491271	3.25	0.00011573	3.66787	0.0337186	96.8899	2.13959	207.305	7.66421e-05	97.4052	2.12827	2353.17	48.6866	128.904	1.527	0.621808	3028.69	2.74251	258.494	154.421	0.347362	0.272695	1.60016	0.597389
	0.324839	0.000295892	0.000154162	0.000454565	4.43496	0.000174721	3.40612	0.0391418	65.8743	1.98691	130.886	0.000115709	66.5224	1.96755	2243.47	45.5512	89.9579	1.7278	0.6873	4950.51	3.45888	210.125	96.6991	0.436986	0.466312	2.23338	0.460199
	0.330001	0.000308634	0.000201694	0.000534611	3.66027	0.000108921	3.81483	0.0419906	89.4508	2.22532	199.057	7.21328e-05	90.0531	2.21044	2493.45	48.7116	122.437	1.6312	0.615089	3048.6	2.51558	269.127	127.696	0.350509	0.3131	1.56416	0.474481
	0.369608	0.000231536	0.000206225	0.000532223	3.48085	0.000168296	3.26442	0.0491465	80.5007	1.90424	153.293	0.000111454	80.9913	1.89271	2007.56	46.2614	102.998	1.7107	0.671905	7058.26	3.56499	207.711	154.286	0.447456	0.552176	2.06942	0.742791
	0.32081	0.000237924	0.000181947	0.000434387	3.14665	0.000160676	3.31857	0.0345975	90.5482	1.93583	175.286	0.000106408	90.9999	1.92623	2198.85	47.2004	118.45	1.5667	0.675749	6946.78	3.64996	219.816	187.32	0.436508	0.522106	2.01071	0.852166
	0.342729	0.000328154	0.000162771	0.000540706	1.66643	0.000132683	3.55685	0.0377233	183.387	2.07483	380.497	8.78693e-05	183.645	2.07192	2280.67	46.8508	240.532	1.83189	0.632152	7722.27	4.29509	232.123	620.512	0.377828	0.336238	1.78599	2.67321
	0.320608	0.000182	0.000193155	0.000421602	4.91634	0.000177009	3.96275	0.0628979	69.1037	2.31161	159.741	0.000117224	69.9365	2.28408	2626.45	46.6669	121.98	1.62937	0.763614	13209.7	4.08047	256.586	104.464	0.499088	0.89161	2.62663	0.40713
	0.292959	0.000266485	0.000212385	0.000472085	2.24674	0.000176841	4.27883	0.0712675	163.593	2.49598	408.325	0.000117113	164.01	2.48963	2951.35	47.2709	329.587	1.51313	0.807168	26057.2	6.70099	284.27	512.331	0.471589	0.663108	2.86029	1.80227
	0.31332	0.000261013	0.000194066	0.000427379	1.86756	0.0001849	3.23883	0.0256807	148.996	1.88932	281.501	0.000122451	149.259	1.88599	2169.68	46.8342	200.351	1.49118	0.711726	13673.3	5.46267	211.218	545.47	0.45817	0.536232	2.26552	2.58249
	0.341906	0.00024673	0.000166995	0.000501474	2.19881	0.000179849	3.88649	0.0525201	151.834	2.26712	344.226	0.000119105	152.206	2.26159	2495.15	46.0518	260.173	1.75498	0.755821	21850.2	6.05495	245.058	488.149	0.47379	0.661665	2.64249	1.99198
	0.29795	0.000296373	0.000208098	0.000441497	0.148835	0.000158029	2.81242	0.0167004	1624	1.64058	2664.3	0.000104655	1624.02	1.64056	1926.19	47.5533	1660.12	1.45693	0.623098	63075.4	13.4393	189.086	65446.4	0.401799	0.351098	1.6843	346.12
	0.331316	0.000266159	0.000169312	0.000389165	4.34966	0.000179576	3.4344	0.0310618	67.729	2.0034	135.688	0.000118924	68.3703	1.98461	2240.39	46.5419	97.0196	1.51708	0.715019	6526.9	3.69189	221.186	105.171	0.45333	0.537428	2.31534	0.475487
	0.337547	0.000235364	0.000170727	0.000427127	4.62779	0.000187372	3.53345	0.0405641	65.4776	2.06118	134.961	0.000124087	66.1781	2.03936	2283.52	46.0879	98.9476	1.59667	0.733158	8407.5	3.89026	223.146	100.531	0.477011	0.651626	2.48251	0.450515
	0.324794	0.00032384	0.000220656	0.000487694	5.98199	0.000155884	3.38434	0.0510735	48.4463	1.9742	95.6426	0.000103234	49.3037	1.93987	2229.27	46.7527	63.2785	1.4868	0.661615	2542.96	2.58822	219.941	48.5786	0.403288	0.374785	1.96456	0.220871
	0.349163	0.000361681	0.000186898	0.0005166	2.4057	0.000131219	4.60522	0.0332199	164.425	2.68638	441.709	8.68997e-05	164.906	2.67854	2923.98	47.7053	321.485	1.68175	0.727822	12157.4	4.91074	311.603	395.379	0.387743	0.390039	2.28342	1.26886
	0.282063	0.000304121	0.000201432	0.000509557	5.24615	0.000181905	3.83554	0.0319061	62.659	2.2374	140.193	0.000120467	63.5168	2.20718	2686.36	45.8859	104.896	1.59265	0.748225	6444.9	3.88862	240.106	80.5834	0.453233	0.529878	2.60841	0.335616
	0.273566	0.000316104	0.000191872	0.000498383	2.80488	0.000120469	4.38744	0.0277113	134.327	2.55934	343.789	7.97811e-05	134.86	2.54922	3109.28	48.5591	238.077	1.61206	0.692508	7528.19	3.87978	307.589	269.867	0.37779	0.389936	1.99516	0.877361
	0.360345	0.000247397	0.000181458	0.000419427	4.97986	0.000154095	3.84217	0.0397661	66.1421	2.24126	148.242	0.00010205	66.9596	2.2139	2397.58	47.3954	105.607	1.52937	0.712396	6664.67	3.30527	256.606	86.0641	0.43517	0.553467	2.21636	0.335394
	0.330609	0.000247124	0.000184594	0.000441451	3.404	0.000154669	3.52429	0.0518981	88.8761	2.05584	182.715	0.00010243	89.3943	2.04392	2301.46	47.4109	125.342	1.56255	0.685998	7086.22	3.61429	235.53	167.397	0.429998	0.513443	2.05381	0.710726
	0.32285	0.000273491	0.000179749	0.000407277	3.31412	0.000167369	4.02624	0.0505164	104.294	2.34864	244.95	0.000110841	104.871	2.33572	2659.72	47.3366	186.566	1.50535	0.761652	12591.2	4.7716	268.232	211.267	0.450222	0.573711	2.53974	0.787629
	0.332714	0.000264024	0.000191076	0.000487578	0.897242	0.000167288	3.87894	0.0103221	371.52	2.26272	840.644	0.000110787	371.672	2.26179	2525.09	47.0551	626.165	1.61425	0.744863	42937	8.73736	255.355	2787.96	0.451079	0.575193	2.45816	10.918
	0.345554	0.000278493	0.000144651	0.00047258	3.09171	0.000192125	4.0252	0.0950201	111.784	2.34803	262.473	0.000127235	112.323	2.33678	2569.88	45.2606	204.841	1.8111	0.780426	17718.8	5.73935	245.157	259.236	0.480771	0.647032	2.91671	1.05743
	0.285844	0.000227357	0.000228215	0.000446068	2.80202	0.000186684	3.8283	0.0784436	117.328	2.23317	262.013	0.000123632	117.793	2.22436	2667.17	47.1554	204.891	1.47911	0.781986	18644.1	5.57749	253.097	305.302	0.488821	0.733066	2.69776	1.20627
	0.314392	0.000213223	0.000189924	0.000515343	3.45494	0.000132355	3.98419	0.0468786	98.9888	2.32411	230.061	8.76523e-05	99.5832	2.31024	2664.82	47.6489	155.993	1.7698	0.678051	8299.89	3.45036	268.944	179.342	0.419823	0.575575	1.9865	0.666837
	0.297825	0.000206101	0.000132969	0.000405393	3.81124	0.000146912	3.12469	0.0297487	70.358	1.82274	128.244	9.72929e-05	70.8712	1.80954	2140.45	46.8005	79.6367	1.75848	0.620976	4051.87	2.73644	203.482	116.653	0.423928	0.51771	1.72711	0.573284
	0.300418	0.000384778	0.000242776	0.000459312	2.8241	0.00015281	3.60156	0.0643094	109.515	2.10091	230.081	0.000101199	109.956	2.09249	2458	47.8802	160.308	1.38931	0.696747	5630.87	4.03833	245.482	227.454	0.393238	0.333538	2.07735	0.926561
	0.347716	0.000245711	0.00021637	0.000501589	0.1	0.000165404	3.93885	0.0393378	3385.19	2.29766	7778.03	0.000109539	3385.21	2.29765	2506.45	47.3755	5845.89	1.58849	0.75159	440764	26.3963	262.842	230694	0.456517	0.620792	2.46901	877.69
	0.312495	0.000302649	0.000201737	0.000451141	0.1	0.000139601	3.91551	0.0535661	3365.13	2.28405	7686.11	9.24512e-05	3365.15	2.28403	2626.13	48.4466	5411	1.49543	0.703998	227559	21.4338	273.233	201840	0.401799	0.422856	2.0715	738.71
	0.345344	0.000315852	9.09353e-05	0.000386152	3.55813	0.000181	4.24687	0.0457173	102.448	2.47734	253.798	0.000119867	103.1	2.46167	2712.28	43.5415	189.827	2.34797	0.747944	12998.2	5.20508	239.384	197.284	0.459593	0.566191	2.89467	0.824135
	0.342298	0.000274129	0.000250836	0.000441144	3.37125	0.000157997	3.82214	0.0674468	97.3259	2.22958	216.996	0.000104634	97.8826	2.2169	2452.38	48.3897	159.924	1.35106	0.736992	9583.84	4.17041	266.091	186.246	0.432665	0.512838	2.27556	0.699931
	0.319904	0.000258196	0.000125894	0.000365316	2.77514	0.000140365	3.84559	0.0539743	119.001	2.24326	266.951	9.29569e-05	119.464	2.23457	2551.44	47.2897	181.944	1.73289	0.681561	8719.62	3.95183	255.69	264.551	0.413604	0.487576	2.03772	1.03466
	0.355899	0.000203634	0.000271683	0.000465319	1.8173	0.000172993	3.59385	0.0346612	169.903	2.09641	356.187	0.000114565	170.187	2.09291	2258.22	47.5388	262.197	1.5173	0.736122	24112.5	5.84673	241.476	663.462	0.475542	0.713623	2.35218	2.74752
	0.330189	0.000273308	0.000136221	0.000450138	5.30065	0.000177312	3.45275	0.0269769	55.8224	2.0141	112.432	0.000117425	56.6023	1.98635	2256.16	45.0043	77.2777	1.82667	0.687327	4747.9	3.2534	207.918	70.1602	0.447564	0.517229	2.28817	0.337442
	0.320447	0.000210571	0.000220775	0.000378326	2.08371	0.000181557	4.16073	0.0441346	171.535	2.42709	416.332	0.000120236	171.912	2.42177	2758.32	48.1677	342.2	1.37522	0.821941	37231.4	7.0101	287.012	611.929	0.498172	0.838083	2.85653	2.13207
	0.364322	0.000335935	0.000212643	0.00050689	2.17853	0.000157973	3.07033	0.0487922	121.067	1.79103	216.834	0.000104618	121.358	1.78674	1904.03	46.9457	139.174	1.54435	0.641844	5522.5	3.88986	201.184	330.219	0.398247	0.337232	1.83374	1.64138
	0.286243	0.000192826	0.000136021	0.000488287	3.89682	0.000144649	3.54078	0.0340856	77.9708	2.06545	161.045	9.57943e-05	78.5649	2.04983	2465.48	46.2566	104.388	1.97494	0.648191	6059.7	3.0847	225.25	130.329	0.43701	0.617175	1.92631	0.578595
	0.317397	0.000253157	0.000192784	0.000470411	2.16164	0.000171976	3.43188	0.0740426	136.382	2.00193	273.027	0.000113891	136.704	1.99721	2285.35	46.8414	192.882	1.58567	0.706459	12502.1	4.98522	223.877	423.261	0.449619	0.544553	2.23143	1.8906
	0.368385	0.000308077	0.000190576	0.000438926	4.30687	0.000170837	4.06069	0.046904	80.8786	2.36874	191.58	0.000113137	81.6296	2.34694	2502.1	46.8211	146.166	1.52064	0.762949	9685.39	4.31098	264.668	124.256	0.444087	0.522354	2.60482	0.46948
	0.351309	0.000368929	0.000228877	0.000399131	2.60172	0.000144968	3.64175	0.0191636	120.217	2.12436	255.383	9.60054e-05	120.628	2.11712	2304.62	48.507	176.611	1.34689	0.691552	6440.75	4.02117	254.763	266.911	0.387226	0.333898	1.99393	1.04768
	0.30639	0.000256753	0.000138693	0.000436612	3.86592	0.000165754	3.87703	0.0711505	86.0598	2.2616	194.633	0.000109771	86.7054	2.24476	2623.41	46.0879	140.809	1.77587	0.723461	9051.66	4.10536	244.844	149.275	0.449885	0.581646	2.41728	0.609673
	0.356062	0.000367584	8.23566e-05	0.000464094	2.24158	0.00013461	3.76334	0.0780953	144.215	2.19528	316.592	8.9146e-05	144.581	2.18972	2364.12	43.4174	192.047	2.86294	0.606608	5657.21	3.89362	210.92	360.96	0.376034	0.321847	1.91495	1.71136
	0.288125	0.000257491	0.000132346	0.000422594	3.57317	0.000119352	3.65488	0.0434224	87.7951	2.13202	187.18	7.90408e-05	88.3586	2.11842	2538.22	47.6961	115.525	1.79339	0.617183	3657.37	2.67754	247.205	138.195	0.377262	0.39411	1.6426	0.559031
	0.30188	0.000277079	0.000147393	0.000458974	2.77028	0.000120981	3.93569	0.0269256	122.004	2.29582	280.098	8.01197e-05	122.476	2.28696	2680.42	47.8581	181.453	1.76817	0.647821	6074.18	3.4015	268.009	249.865	0.380363	0.400785	1.79749	0.9323
	0.295375	0.000194662	0.000215288	0.000468811	5.23345	0.000182375	3.75533	0.0399835	61.4984	2.19061	134.719	0.000120778	62.3363	2.16116	2581.42	46.1536	100.455	1.65626	0.745663	9726.65	3.81523	237.835	86.4321	0.494097	0.81266	2.56061	0.363411
	0.348967	0.00021284	0.000177097	0.000444217	3.14928	0.000160553	3.88639	0.0451358	105.953	2.26706	240.201	0.000106326	106.482	2.25579	2468.32	47.2056	175.606	1.64446	0.731077	14045.4	4.44077	257.485	231.037	0.460491	0.682972	2.35293	0.897286
	0.314626	0.000310959	0.000213197	0.000396233	4.63407	0.000152817	3.78389	0.0660338	70.023	2.20727	154.559	0.000101204	70.7742	2.18384	2529.98	48.0445	110.394	1.36639	0.714253	5095.42	3.35133	259.683	92.969	0.413059	0.430754	2.16813	0.358009
	0.327806	0.000291133	0.000193585	0.000421108	4.59087	0.000146831	3.23316	0.0680987	60.397	1.88601	113.909	9.72388e-05	61.0331	1.86635	2120.19	47.5522	72.9704	1.47517	0.640601	2864.81	2.61795	217.363	77.9153	0.39759	0.377797	1.78034	0.358456
	0.35044	0.000317188	0.000227016	0.000455175	3.48108	0.000177525	3.09054	0.055417	76.2077	1.80281	137.388	0.000117566	76.6722	1.79189	1958.42	46.8986	93.5203	1.41612	0.680701	4848.5	3.5833	202.102	139.314	0.426824	0.402525	2.06663	0.689327
	0.29322	0.000258661	0.000181914	0.000403209	4.13973	0.000147984	4.01259	0.0598158	83.1592	2.34068	194.649	9.80023e-05	83.8734	2.32075	2766.69	47.9897	140.875	1.49036	0.723737	7561.27	3.66607	274.751	127.869	0.427154	0.532905	2.23117	0.465398
	0.360276	0.000278275	0.000216773	0.000446057	2.48448	0.000144155	2.78513	0.0924244	96.2835	1.62466	156.428	9.5467e-05	96.5838	1.61961	1738.16	48.0355	93.4347	1.44333	0.597302	3432.49	2.90841	191.068	223.898	0.387265	0.336749	1.51681	1.17182
	0.345352	0.00033213	0.000207602	0.000424962	0.1	0.000165335	3.5871	0.074234	3082.88	2.09247	6450.84	0.000109494	3082.9	2.09246	2290.88	47.5838	4646.21	1.43967	0.720248	236002	23.5226	241.479	194096	0.421759	0.418075	2.24758	803.783
	0.377274	0.000221456	0.0002096	0.000442332	2.96364	0.000152759	3.99975	0.0533943	115.887	2.33318	270.385	0.000101165	116.4	2.3229	2429.86	48.0488	199.157	1.52697	0.736567	15195.1	4.49961	274.546	261.46	0.44832	0.643115	2.30531	0.952335
	0.311142	0.000233237	9.92353e-05	0.000466857	1.56006	0.000181935	4.16716	0.0439387	229.512	2.43084	557.908	0.000120487	229.795	2.42785	2800.41	44.6502	426.055	2.17599	0.763667	38562.7	7.83826	247.005	1073.61	0.488983	0.760113	2.86965	4.34652
	0.315134	0.000330534	0.000101977	0.000436654	2.40669	0.000151913	4.00659	0.070785	142.993	2.33718	334.199	0.000100605	143.411	2.33036	2676.9	44.6283	228.369	2.28116	0.683331	9796.16	4.79165	237.254	366.19	0.413114	0.429873	2.29991	1.54345
	0.336979	0.000327057	0.000159599	0.000442539	1.29325	0.000190582	3.73532	0.0462678	248.191	2.17894	540.793	0.000126213	248.402	2.17709	2416.06	45.633	409.073	1.70117	0.756431	27598.6	8.04549	231.261	1311.06	0.457713	0.509183	2.69557	5.66915
	0.312082	0.000190273	0.000108876	0.00039968	2.01571	0.000161238	3.76863	0.0322428	160.617	2.19837	353.095	0.00010678	160.947	2.19386	2529.14	46.2564	249.984	1.92409	0.70798	20403.6	5.321	239.743	558.503	0.469725	0.746168	2.29809	2.32959
	0.364573	0.000278551	0.000244972	0.00049492	0.9799	0.000162189	4.01706	0.106915	352.288	2.34328	825.511	0.00010741	352.46	2.34214	2490.15	47.9716	628.109	1.45692	0.760874	42538.3	8.48418	274.849	2374.5	0.442487	0.547354	2.46789	8.6393
	0.346426	0.000287994	0.000256039	0.000470591	2.48918	0.000171191	3.32322	0.0922743	114.668	1.93854	222.289	0.000113372	115.027	1.93249	2118.87	47.6646	156.829	1.37942	0.705516	9098.15	4.47471	224.475	298.403	0.434202	0.461057	2.14927	1.32934
	0.3249	0.000370199	0.000195072	0.000361428	3.66039	0.00012033	4.04531	0.0310086	94.8522	2.35976	223.829	7.96886e-05	95.4908	2.34398	2664.23	48.9892	149.862	1.43703	0.669538	4018.49	3.07461	288.649	138.853	0.359441	0.305796	1.8324	0.481043
	0.336477	0.000303574	0.000202718	0.000451855	4.25458	0.000177126	3.75349	0.0757203	75.6822	2.18954	165.709	0.000117302	76.3682	2.16987	2429.65	46.6945	123.447	1.49298	0.744963	7834.14	4.10764	243.324	118.344	0.446489	0.508147	2.49693	0.486363
	0.331267	0.000254677	0.000228884	0.000471808	0.618975	0.000124581	3.60098	0.0293543	499.971	2.10057	1050.22	8.25038e-05	500.068	2.10016	2349.23	49.2494	680.842	1.48263	0.648283	26035.3	6.78493	259.681	4658.19	0.386336	0.412338	1.69979	17.9381
	0.339538	0.000347836	0.000112249	0.00045102	2.70957	0.00017749	3.68906	0.0673462	116.924	2.15195	251.615	0.000117543	117.358	2.144	2376.92	43.9193	175.43	2.19772	0.697215	9157.78	4.90677	211.565	279.747	0.434597	0.4391	2.47224	1.32227
	0.321135	0.000212453	0.000237852	0.000451178	5.39486	0.000198273	4.04405	0.0717023	64.2339	2.35903	151.529	0.000131307	65.1627	2.3254	2678.25	46.3602	122.754	1.50844	0.810099	14428.2	4.58514	258.419	91.0155	0.513594	0.871038	2.99539	0.352201
	0.323241	0.000295559	0.000185453	0.000449988	3.66125	0.000133047	3.40974	0.0369791	79.9306	1.98901	158.983	8.81109e-05	80.469	1.9757	2251.16	47.8944	100.464	1.55811	0.631917	3390.97	2.78345	232.545	124.35	0.382082	0.356964	1.70774	0.534734
	0.3252	0.000235443	0.000155333	0.000414488	2.53306	0.00013889	3.74739	0.0650379	127.061	2.18598	277.753	9.19804e-05	127.473	2.17892	2466.93	47.8986	188.343	1.63809	0.678095	9653.37	3.97849	255.619	312.089	0.417059	0.5159	1.9661	1.22092
	0.316446	0.000348309	0.000175621	0.000403592	5.47757	0.000178597	4.07695	0.0491472	63.7728	2.37822	151.666	0.000118276	64.7229	2.34331	2718.7	45.9249	115.958	1.57101	0.76456	6684.27	4.01417	255.652	76.6151	0.442177	0.482257	2.71892	0.299685
	0.323396	0.000355541	0.000178055	0.00043656	2.63884	0.000177979	3.40007	0.0467088	110.658	1.98337	219.476	0.000117867	111.047	1.97642	2244.27	46.0151	154.142	1.61234	0.702321	7464.07	4.61211	214.045	266.684	0.426321	0.397097	2.28528	1.24592
	0.304107	0.000287477	0.000223222	0.000471708	3.26554	0.000139602	3.91113	0.0491695	102.823	2.28149	234.59	9.24517e-05	103.375	2.2693	2655.19	48.4139	164.506	1.46435	0.701252	7106.32	3.73727	272.559	190.056	0.404779	0.442303	2.05815	0.697302
	0.280543	0.000272037	0.000170648	0.000401304	4.66628	0.000172924	4.208	0.0602208	77.3316	2.45466	189.823	0.000114519	78.1726	2.42826	2953.47	46.8303	148.239	1.53466	0.780933	10338.4	4.39449	274.377	113.785	0.460961	0.619528	2.72799	0.414704
	0.331459	0.00030479	0.000132695	0.000428089	4.40171	0.000155866	3.26938	0.0518105	63.7093	1.90714	121.502	0.000103222	64.3269	1.88883	2132.29	45.5411	77.263	1.85073	0.635897	3184.47	2.85961	201.6	87.7591	0.406976	0.387687	1.91265	0.435313
	0.293353	0.00029754	0.000216988	0.00045241	3.73977	0.000163139	3.16797	0.0317394	72.6998	1.84798	134.348	0.000108039	73.2105	1.83509	2183.92	47.2607	89.4027	1.44586	0.665456	3954.79	3.21962	210.378	120.634	0.416295	0.40384	1.94495	0.573417
	0.331343	0.000383251	0.000221148	0.000493904	1.57804	0.000146085	4.0249	0.0348956	219.15	2.34786	514.533	9.67448e-05	219.426	2.3449	2625.49	47.771	370.215	1.51087	0.719517	13996	5.86682	273.088	816.56	0.393984	0.358744	2.22547	2.9901
	0.321979	0.000242614	0.000316424	0.000504134	2.5104	0.000173071	3.03286	0.0522523	103.764	1.76917	183.576	0.000114617	104.094	1.76356	2006.08	47.4806	123.922	1.42233	0.675048	7642.81	4.02134	203.284	273.544	0.443614	0.504937	1.98292	1.34562
	0.306452	0.000211314	0.00021962	0.000439477	4.51976	0.000125597	4.11236	0.0384011	78.0348	2.39888	187.196	8.31766e-05	78.8317	2.37463	2782.4	48.9551	128.793	1.52096	0.688013	6473.1	2.97506	293.026	105.823	0.411444	0.566479	1.93761	0.361138
	0.302721	0.000326789	0.000163159	0.000355058	2.99839	0.000166283	3.43674	0.0612322	98.4182	2.00476	197.305	0.000110121	98.8643	1.99572	2337.79	46.7648	136.786	1.5447	0.693272	6257.56	4.05919	223.462	205.495	0.419771	0.407585	2.15595	0.919597
	0.316581	0.000213315	0.000208106	0.000474917	3.37776	0.00015702	4.18379	0.0586188	106.329	2.44055	259.501	0.000103986	106.94	2.42661	2789.39	47.4722	195.689	1.6257	0.754098	15381.8	4.58467	280.328	216.748	0.461784	0.716921	2.4754	0.773196
	0.302826	0.000341695	0.000213977	0.000489177	3.84045	0.000145313	3.56927	0.0450196	79.7555	2.08208	166.057	9.62335e-05	80.3461	2.06677	2427.57	47.4749	111.181	1.51425	0.669536	3894.92	3.19809	239.181	121.132	0.391321	0.352774	1.95114	0.506446
	0.341995	0.000338766	0.000151535	0.000412989	2.31102	0.000115733	3.61561	0.0809381	134.387	2.1091	283.435	7.66447e-05	134.749	2.10342	2320.93	47.9348	172.508	1.72733	0.608633	4229.52	3.17274	247.002	305.007	0.351557	0.288419	1.58153	1.23483
	0.348115	0.000238994	0.000211455	0.000495856	2.6302	0.000116192	3.55836	0.0874718	116.19	2.07571	241.177	7.69486e-05	116.596	2.06848	2262.94	48.9248	148.864	1.6025	0.617242	5278.91	2.959	253.236	248.012	0.376357	0.403629	1.56143	0.979368
	0.291426	0.000230012	0.000269038	0.00046645	3.72578	0.000130463	4.08673	0.0509834	94.1367	2.38392	224.415	8.63993e-05	94.7932	2.36742	2824.96	49.2032	157.92	1.44144	0.703696	7741.27	3.42197	294.157	155.339	0.412434	0.538951	2.00657	0.528082
	0.308408	0.000283509	0.000219327	0.000391477	4.90816	0.000165962	3.74827	0.00265695	65.4728	2.18649	143.156	0.000109908	66.2593	2.16054	2528.9	47.8258	105.504	1.33673	0.736985	6140.33	3.55805	254.902	86.8829	0.43738	0.507623	2.32949	0.340849
	0.289052	0.00025687	0.000230539	0.000548944	3.3617	0.00016811	4.02774	0.0321248	102.853	2.34951	241.654	0.000111331	103.438	2.33622	2793.51	46.8109	182.435	1.62563	0.754941	12457.5	4.73936	262.406	208.443	0.45691	0.613671	2.55153	0.794353
	0.324772	0.000226938	0.000102821	0.000457326	1.90575	0.000142745	3.43212	0.018251	154.721	2.00207	309.763	9.45328e-05	155.006	1.9984	2260.81	45.845	195.188	2.11116	0.630122	9631.18	4.16254	214.469	507.375	0.418801	0.504513	1.85325	2.36573
	0.374705	0.000274691	0.000161524	0.000409575	2.2603	0.000155976	3.9022	0.0594977	148.297	2.27628	337.565	0.000103295	148.68	2.27042	2380.38	47.3585	244.821	1.59583	0.725254	15090.5	5.09392	260.209	423.053	0.432172	0.517436	2.30067	1.62582
	0.360596	0.000341694	0.000185091	0.000462957	3.33907	0.000147743	3.35252	0.0502962	86.1921	1.95563	168.56	9.7843e-05	86.6758	1.94472	2091.21	46.9685	109.208	1.60049	0.647889	4021.41	3.2226	219.889	150.116	0.390014	0.337494	1.86662	0.682693
	0.362845	0.000243128	0.000126599	0.000492722	3.80653	0.000188946	3.64663	0.0658279	82.2122	2.1272	174.882	0.00012513	82.8104	2.11183	2266.67	44.6594	126.96	1.97353	0.725977	11116.6	4.44367	216.239	154.442	0.479735	0.658722	2.59232	0.71422
	0.341262	0.000213129	6.06348e-05	0.000443616	3.55188	0.000161938	3.97177	0.0582044	95.9803	2.31686	222.373	0.000107244	96.5892	2.30226	2552.4	43.2687	151.189	2.7982	0.679887	11343.1	4.15604	221.08	186.952	0.46405	0.702102	2.42212	0.845631
	0.326536	0.000181958	0.000131692	0.000428554	2.24786	0.00014644	3.18345	0.067103	121.652	1.85701	225.91	9.69805e-05	121.963	1.85228	2091.53	46.7828	141.65	1.86846	0.627021	8694.13	3.63782	207.152	352.519	0.436573	0.598322	1.76222	1.70174
	0.314675	0.000280719	9.59832e-05	0.000440845	3.63247	0.000164108	3.68481	0.0293935	87.0653	2.14947	187.145	0.000108681	87.6427	2.13531	2463.56	44.2861	126.256	2.24754	0.674644	6737.34	3.84881	214.866	155.601	0.435465	0.501023	2.27658	0.724175
	0.32286	0.00020694	8.04614e-05	0.000470674	2.87957	0.000156943	3.15857	0.0658756	94.1914	1.8425	173.547	0.000103936	94.5854	1.83482	2086.51	44.2759	106.112	2.42318	0.611431	6123.01	3.3744	184.095	214.39	0.43943	0.558511	1.87081	1.16456
	0.349395	0.00027498	0.000236708	0.000443174	4.28295	0.000187019	3.53488	0.0325723	70.8004	2.06202	145.992	0.000123854	71.4507	2.04325	2243.6	47.0139	109.186	1.38667	0.747896	8244.92	4.07888	232.298	113.88	0.462347	0.557758	2.48256	0.490233
	0.325367	0.000224086	0.000114255	0.000491386	3.11695	0.000136786	4.20143	1e-05	115.732	2.45083	283.639	9.0587e-05	116.298	2.43889	2765.14	46.327	195.312	2.07706	0.688594	11028.7	3.99005	268.091	236.616	0.427319	0.597529	2.16734	0.882595
	0.345332	0.000314923	0.000253656	0.000534197	2.98879	0.000137839	3.24443	0.028563	93.2102	1.89259	176.408	9.12841e-05	93.63	1.8841	2072.11	48.1117	111.306	1.46891	0.630958	3756.03	3.03531	223.284	177.037	0.380621	0.330987	1.68721	0.792876
	0.375664	0.000315923	0.000152519	0.000548976	1.5055	0.000140274	3.50909	0.0458972	200.276	2.04697	409.959	9.28969e-05	200.506	2.04462	2137.3	46.3168	261.69	1.90453	0.638331	10020.4	4.73634	223.816	775.182	0.390443	0.364375	1.8633	3.46349
	0.340812	0.000292948	0.00018791	0.00040829	4.69237	0.000173331	3.08528	0.0310199	56.3825	1.79975	101.474	0.000114788	57.0024	1.78017	1984.07	46.5822	67.5704	1.47635	0.665887	3498.87	2.97389	199.046	76.478	0.427326	0.422753	2.00461	0.384224
	0.3466	0.000361977	0.000174255	0.000414097	1.02917	0.000182814	4.05806	0.0367576	338.844	2.3672	802.112	0.000121069	339.026	2.36593	2586.72	46.239	627.713	1.61064	0.782575	39353.7	9.56009	257.96	2195.2	0.446695	0.47959	2.80999	8.50984
	0.327411	0.000265353	0.000184292	0.000391178	2.54149	0.000191322	3.85663	0.0757144	130.331	2.2497	293.207	0.000126703	130.757	2.24239	2530.52	46.9734	232.153	1.45701	0.791774	20284.7	6.08448	253.006	367.723	0.480671	0.64892	2.7872	1.45342
	0.278917	0.000206995	0.000198607	0.000523679	4.14448	0.000155905	3.63323	0.0318792	75.2105	2.11938	159.4	0.000103248	75.8579	2.1013	2555.82	46.5108	109.201	1.78607	0.685076	6992.07	3.40051	233.678	121.528	0.449397	0.635221	2.12833	0.520067
	0.322569	0.000310094	0.000168008	0.000504249	5.80089	0.000159363	3.17466	0.0407754	46.8736	1.85188	86.8046	0.000105538	47.6549	1.82153	2098.04	45.5127	54.777	1.73591	0.631038	2191.24	2.46182	195.515	48.8409	0.406294	0.375722	1.88588	0.249806
	0.293114	0.00020635	0.000157208	0.000392847	5.25751	0.00016207	3.91628	0.0298495	63.839	2.2845	145.84	0.000107331	64.7166	2.25351	2700.69	46.9576	106.506	1.60819	0.730296	8123.66	3.4911	256.745	83.9107	0.464233	0.710393	2.37277	0.326825
	0.287237	0.000340918	0.000143776	0.000466403	2.00963	0.000154046	3.87675	0.0413858	165.724	2.26144	374.775	0.000102017	166.063	2.25683	2695.66	45.9618	261.369	1.86963	0.697401	10721.5	5.19814	243.489	505.626	0.410904	0.409296	2.2586	2.07658
	0.331317	0.000298695	0.000149246	0.00042244	4.77684	0.000178608	3.98022	0.0225826	71.4451	2.32179	165.881	0.000118284	72.2587	2.29565	2596.44	45.6462	124.771	1.70782	0.752176	8378.2	4.16419	246.566	101.262	0.454594	0.550958	2.66379	0.410688
	0.333037	0.000249222	0.000186448	0.000431165	3.36603	0.000161382	4.09486	0.0601388	104.433	2.38867	249.455	0.000106875	105.028	2.37513	2664.36	47.5312	188.909	1.53336	0.757287	13482.1	4.62969	275.052	209.042	0.451875	0.617296	2.4902	0.760011
	0.356169	0.000404486	0.000169985	0.000422171	4.33901	0.000170272	2.99364	0.0286508	59.1823	1.74629	103.349	0.000112763	59.7399	1.72999	1880.28	45.188	65.2282	1.71163	0.631143	2282.06	2.87033	181.745	80.2706	0.394993	0.292296	1.91372	0.441665
	0.324173	0.00032024	0.000132377	0.000419749	3.88257	0.000154881	3.3974	0.0601212	75.089	1.98182	148.813	0.00010257	75.6571	1.96694	2239.93	45.6016	96.3889	1.86494	0.647719	3859.22	3.17383	210.051	116.81	0.405222	0.381815	1.97916	0.556104
	0.31262	0.000243978	0.000210006	0.00047464	1.97299	0.000142668	3.80897	0.0430859	165.854	2.2219	368.51	9.44821e-05	166.181	2.21753	2554.21	48.1994	257.099	1.55359	0.697672	13506.7	4.77472	263.092	528.506	0.42133	0.520455	2.05536	2.00882
	0.314079	0.000176221	0.000192352	0.000535892	5.29137	0.000152317	3.87762	0.0474249	62.802	2.26194	142.055	0.000100872	63.6764	2.23088	2594.72	45.9241	97.8634	1.97858	0.688914	7701.7	3.14506	243.145	81.8907	0.46352	0.77394	2.20758	0.336798
	0.349331	0.000317676	0.000208119	0.000407428	4.09136	0.000146454	3.61031	0.0530282	75.7096	2.10601	159.445	9.69891e-05	76.3448	2.08849	2291.69	48.0793	109.105	1.40447	0.684282	4574.58	3.19297	248.129	110.124	0.39934	0.386444	1.98712	0.44382
	0.319226	0.000295516	0.000150362	0.000356326	4.30421	0.000165695	3.43012	0.0415332	68.3616	2.0009	136.785	0.000109732	68.9956	1.98252	2278.06	46.4952	93.8038	1.58557	0.685776	4744.13	3.34958	220.467	100.899	0.426374	0.446153	2.13411	0.457663
	0.316978	0.000352705	0.000193008	0.000430693	4.12829	0.000124935	3.54119	0.0544986	73.5937	2.06569	152.022	8.27382e-05	74.2222	2.0482	2359.58	48.1179	95.2253	1.52426	0.626392	2446.5	2.54466	243.77	95.5769	0.359781	0.291194	1.66245	0.392078
	0.330608	0.000261615	9.37246e-05	0.000460314	3.445	0.000177849	3.11286	0.0171669	77.5642	1.81584	140.844	0.000117781	78.0273	1.80506	2032.79	43.7097	89.7631	2.27541	0.637324	5159.73	3.51699	176.821	149.27	0.444659	0.492514	2.08561	0.844191
	0.334982	0.000216008	0.000188614	0.000409638	3.25404	0.000150586	3.72942	0.0492369	98.3932	2.17549	214.054	9.97261e-05	98.9178	2.16396	2419.51	48.0493	151.091	1.52082	0.705856	10009.7	3.86346	255.996	198.811	0.440928	0.605485	2.11703	0.776616
	0.358577	0.000228309	0.000175744	0.000491778	3.90908	0.000166566	3.66431	0.0748012	80.4371	2.13751	171.935	0.000110309	81.0539	2.12125	2292.92	46.3456	121.892	1.72655	0.708939	9142.18	3.83836	234.005	140	0.456482	0.621147	2.29546	0.598277
	0.369789	0.000313057	0.000175998	0.000396052	2.20698	0.000136335	3.78106	0.0300316	147.168	2.20562	324.597	9.0288e-05	147.531	2.2002	2324.61	48.2192	220.602	1.52193	0.67962	8925.14	4.22652	261.379	389.189	0.391167	0.384577	1.94877	1.48898
	0.326662	0.000310118	0.000152157	0.000510116	0.850099	0.000194238	3.53205	0.0462011	357.059	2.06036	735.672	0.000128634	357.19	2.05961	2320.13	44.9792	538.601	1.84153	0.732122	36568	9.40891	212.456	2896.14	0.461937	0.517764	2.59903	13.6317
	0.32207	0.000344262	0.000143746	0.000458493	1.97548	0.000173612	3.48073	0.0586786	151.37	2.03043	307.346	0.000114975	151.669	2.02643	2302.01	45.2272	212.175	1.86337	0.690345	10170.4	5.27833	211.684	487.197	0.426101	0.410166	2.28561	2.30152
	0.332033	0.000336518	0.000243879	0.000431806	2.66971	0.000183716	3.46785	0.0474147	111.557	2.02291	225.67	0.000121666	111.958	2.01566	2259.79	47.382	167.448	1.33151	0.742005	9708.85	4.96201	231.476	274.04	0.439642	0.441666	2.40578	1.18388
	0.340393	0.000335639	0.000113488	0.000484867	2.51878	0.000163645	3.34965	0.0586634	114.22	1.95396	223.182	0.000108374	114.586	1.94772	2155.45	44.2521	143.49	2.20104	0.642925	6050.98	4.09151	195.023	278.963	0.41236	0.38115	2.07072	1.43041
	0.315473	0.000298966	0.000244363	0.000390612	3.5162	0.000154711	3.62773	0.0619627	88.5584	2.11617	187.405	0.000102458	89.109	2.1031	2422.58	48.7964	134.237	1.265	0.716292	6497.49	3.74136	256.819	156.322	0.416307	0.436816	2.11385	0.608687
	0.272408	0.000228046	0.000164538	0.000508178	1.71083	0.000198897	3.47647	0.0787296	174.589	2.02794	354.057	0.00013172	174.848	2.02494	2467.62	45.3265	262.094	1.80719	0.74026	23238.9	6.72092	212.354	754.207	0.495235	0.708858	2.61658	3.55164
	0.330934	0.000303343	0.000192715	0.000423166	4.31346	0.000127161	3.46299	0.0741392	68.868	2.02007	139.119	8.42125e-05	69.5095	2.00143	2260.33	48.3693	87.3603	1.48453	0.627955	2708.88	2.48074	240.884	88.5586	0.372274	0.336744	1.65343	0.367639
	0.355555	0.000274905	0.000153482	0.000390082	1.82167	0.000147471	3.13913	0.0460695	148.049	1.83116	271.102	9.76628e-05	148.298	1.82809	1973.55	47.3543	171.536	1.60504	0.632736	7384.37	4.03139	209.289	488.086	0.402447	0.393603	1.75144	2.33212
	0.288923	0.000279642	0.000178512	0.000428288	3.49772	0.000146809	3.54285	0.0441794	86.9443	2.06666	179.684	9.72242e-05	87.4792	2.05402	2457.66	47.5742	120.801	1.54904	0.672297	5160.07	3.36789	238.403	151.601	0.409062	0.432807	1.95906	0.635901
	0.306814	0.000288724	9.81915e-05	0.000339777	4.08077	0.000143707	3.38594	0.0627946	71.1895	1.97513	140.609	9.51705e-05	71.7838	1.95878	2289.71	45.3552	87.0727	2.05862	0.619256	3212.16	2.79893	207.086	103.491	0.398079	0.39131	1.82876	0.499751
	0.323627	0.000314855	0.000106791	0.000508033	3.43093	0.000152416	3.89301	0.0955836	97.4022	2.27092	221.193	0.000100938	97.979	2.25755	2568.76	44.5015	148.591	2.28093	0.671771	6568.91	3.87792	229.22	175.59	0.414824	0.438629	2.23543	0.76603
	0.312944	0.000352101	0.000157647	0.000363385	3.92164	0.000167877	3.56751	0.0625631	78.0605	2.08105	162.447	0.000111177	78.6629	2.06511	2391.16	46.1008	113.475	1.63276	0.698533	5067.84	3.73261	225.424	124.006	0.417985	0.39519	2.2523	0.550102
	0.322307	0.000238792	0.00019884	0.000421644	4.59723	0.000216663	3.68023	0.0630337	68.653	2.1468	147.384	0.000143485	69.378	2.12437	2433.1	45.9293	118.184	1.48333	0.801878	13431.4	4.91626	230.82	114.711	0.515677	0.77363	2.99024	0.496971
	0.285763	0.000293959	8.74861e-05	0.000375383	2.91704	0.000152465	3.4328	0.0517809	101.052	2.00247	202.353	0.00010097	101.485	1.99391	2391.9	44.3838	127.433	2.31853	0.629759	5044.92	3.5924	201.055	212.103	0.41051	0.415077	1.97501	1.05495
	0.320917	0.000254994	0.000164856	0.000427409	2.72466	0.000162848	3.90843	0.0573923	123.19	2.27992	280.863	0.000107846	123.652	2.2714	2589.27	47.1055	207.069	1.61146	0.737262	13716.9	4.89115	257.848	302.205	0.448094	0.582218	2.40308	1.17203
	0.333887	0.000291161	0.000213426	0.00046889	4.40735	0.000171715	3.89664	0.0706416	75.8347	2.27304	172.375	0.000113719	76.5717	2.25116	2532.15	46.9612	129.519	1.48732	0.751377	8365.71	4.07893	255.497	114.457	0.446489	0.53287	2.51135	0.447977
	0.319496	0.000371759	0.000161951	0.000474385	3.54394	0.000150508	3.34027	0.0284774	80.9013	1.94849	157.636	9.96743e-05	81.4122	1.93626	2217.51	45.9041	100.526	1.78578	0.637714	3226.11	3.14972	209.268	131.591	0.386645	0.314632	1.89329	0.628813
	0.297141	0.000304412	0.00018573	0.000444964	2.70492	0.000133401	3.32521	0.0740094	105.573	1.9397	204.781	8.8345e-05	105.963	1.93256	2280.02	47.9919	128.415	1.55036	0.627085	4004.91	3.15528	227.705	220.658	0.379006	0.339915	1.67489	0.969053
	0.316571	0.000387652	0.000252624	0.000412339	1.17446	0.000162553	4.20521	0.038958	307.682	2.45304	754.755	0.000107651	307.897	2.45132	2803.71	48.4383	593.888	1.29909	0.786862	28518.9	8.26836	293.348	1636.1	0.418418	0.412566	2.58874	5.57734
	0.309476	0.000220941	0.000180637	0.000556881	2.37033	0.000129137	3.79274	0.0422007	137.439	2.21243	304.075	8.55214e-05	137.83	2.20617	2554.96	47.3887	197.931	1.87181	0.650926	9152.34	3.7921	253.234	353.258	0.408358	0.517552	1.8509	1.39499
	0.360775	0.000326226	0.000138127	0.000474338	1.82728	0.000136451	4.35157	0.0214938	204.601	2.53841	519.361	9.03648e-05	204.947	2.53413	2713.64	46.6676	366.775	1.9079	0.706203	15688.4	5.4544	281.77	667.259	0.399339	0.425427	2.24645	2.3681
	0.296486	0.000288554	0.000170296	0.000460193	3.392	0.000134697	3.34449	0.0786767	84.6409	1.95095	165.13	8.92033e-05	85.1309	1.93972	2295.38	47.4679	103.106	1.64463	0.624395	3423.11	2.85477	224.051	143.237	0.384983	0.36342	1.69742	0.639307
	0.310008	0.000312705	0.000247909	0.000546379	2.2386	0.000155892	4.3086	0.0287025	165.33	2.51335	415.533	0.00010324	165.749	2.507	2900.23	47.7725	319.363	1.50432	0.768561	17437	5.81483	292.355	473.207	0.429435	0.501627	2.53904	1.6186
	0.343471	0.000251587	0.00025571	0.000396949	5.17689	0.000163724	3.06775	0.0563587	50.7904	1.78952	90.8905	0.000108426	51.4678	1.76597	1964.83	48.05	60.4325	1.28083	0.664894	3332.45	2.65656	210.584	62.3917	0.42717	0.461261	1.8784	0.29628
	0.303579	0.000259733	0.000214103	0.000342777	3.272	0.000146869	3.54298	0.0613253	92.9603	2.06674	192.125	9.72642e-05	93.4614	2.05566	2407.09	49.2794	133.875	1.26642	0.696815	6527.25	3.54692	255.81	175.983	0.415395	0.466544	1.96143	0.687943
	0.308314	0.000312299	0.000262196	0.000561833	3.25194	0.000172354	4.0152	0.068373	106.001	2.3422	248.276	0.000114142	106.566	2.32979	2709.36	47.0588	190.527	1.49506	0.7674	11594.7	4.96559	264.366	216.162	0.444713	0.516068	2.60874	0.81766
	0.33041	0.000258913	0.000273289	0.000454748	5.83398	0.000149119	3.74109	0.0443006	54.9215	2.1823	119.855	9.87544e-05	55.8472	2.14613	2443.77	48.1988	84.1009	1.35188	0.701686	4452.73	2.85434	258.397	58.962	0.421019	0.496107	2.07913	0.228183
	0.333489	0.000271816	0.00014056	0.000400511	2.02191	0.000165671	3.95779	0.0244293	168.161	2.30871	388.236	0.000109716	168.509	2.30395	2573.43	46.6084	287.694	1.70364	0.741029	18952.6	5.86521	255.622	555.632	0.447719	0.563617	2.47977	2.17364
	0.319724	0.000245225	0.000136885	0.000466642	2.57558	0.000135866	3.79971	0.0817956	126.706	2.2165	280.843	8.99777e-05	127.13	2.2091	2521.67	47.057	186.321	1.84719	0.663436	8667.84	3.87092	250.16	301.084	0.410263	0.491248	1.94993	1.20357
	0.326265	0.000270929	0.000108329	0.000439511	3.47051	0.000120105	3.92426	0.0743826	97.0616	2.28915	222.189	7.95401e-05	97.6497	2.27537	2579.28	46.6525	139.449	2.06161	0.627616	4718.34	2.96034	253.937	158.477	0.380054	0.404854	1.77544	0.62408
	0.362875	0.00027538	0.000221313	0.000495827	5.26281	0.000167763	3.95246	0.0356318	64.3634	2.3056	148.396	0.000111101	65.2501	2.27427	2456.65	46.8088	110.416	1.52241	0.744061	7547.13	3.67945	257.478	81.3119	0.446642	0.55609	2.47873	0.315801
	0.313041	0.000321982	0.000112336	0.000436136	3.95188	0.000152463	4.22106	0.0174449	91.6522	2.46229	225.674	0.000100969	92.3703	2.44314	2828.81	45.0471	159.667	2.11039	0.707513	7435.25	4.02108	254.667	144.96	0.419373	0.464324	2.41994	0.569214
	0.310301	0.000225968	0.000156212	0.000446876	3.7791	0.000181839	3.366	0.0581779	76.438	1.9635	150.086	0.000120423	76.9862	1.94952	2264.78	45.8811	105.51	1.71208	0.702996	8066.88	3.89856	210.669	141.706	0.470003	0.62966	2.30306	0.672647
	0.34331	0.000252488	0.000262438	0.000394229	4.43256	0.000163995	3.41534	0.0245188	66.0885	1.99228	131.667	0.000108606	66.7381	1.97289	2187.99	48.475	93.4271	1.26173	0.709571	5823.6	3.30855	238.609	97.124	0.437245	0.514317	2.10196	0.407042
	0.353842	0.000252845	0.000209	0.000400391	5.4976	0.000166455	3.12642	0.0859626	48.7251	1.82375	88.8621	0.000110235	49.4562	1.79678	1970.78	47.2387	59.0775	1.39666	0.664822	3399.66	2.67042	207.425	56.9232	0.431567	0.474763	1.94305	0.274429
	0.349052	0.0002249	0.000165725	0.000422253	3.07286	0.000150374	3.6622	0.063259	102.328	2.13628	218.602	9.95853e-05	102.815	2.12616	2325.63	47.5319	151.194	1.61729	0.691642	9531.32	3.85932	245.997	216.339	0.435613	0.570584	2.07712	0.879438
	0.324539	0.000247027	6.11737e-05	0.000480221	2.68507	0.000154347	4.00697	0.0409477	128.161	2.3374	299.564	0.000102217	128.628	2.32892	2640.39	42.9835	198.669	2.99106	0.663194	11480.3	4.54083	220.109	314.161	0.441236	0.584049	2.33532	1.4273
	0.333582	0.000277066	0.000154344	0.000467448	2.89922	0.000189972	3.21186	0.0289741	95.1303	1.87359	178.235	0.000125809	95.5336	1.86568	2088.12	45.341	123.811	1.74113	0.694648	8271.47	4.41203	196.316	223.934	0.457568	0.51343	2.30259	1.14068
	0.330861	0.000342274	0.000163938	0.000441305	3.64859	0.000157431	3.83622	0.0787832	90.2413	2.2378	201.942	0.000104259	90.845	2.22293	2504.22	46.3658	142.542	1.68858	0.705857	6408.34	3.92312	245.198	152.366	0.413236	0.410374	2.27356	0.621399
	0.3162	0.000288358	0.000170925	0.000405567	4.45142	0.000141511	3.46428	0.0651998	66.7504	2.02083	134.891	9.37157e-05	67.4119	2.001	2310.97	47.5243	87.7869	1.54676	0.650797	3406.56	2.76742	232.629	88.6059	0.396629	0.394134	1.83962	0.38089
	0.362597	0.000268279	0.000120271	0.00045495	3.95919	0.000142281	3.94684	0.0463229	85.5392	2.30232	196.939	9.4226e-05	86.2118	2.28436	2454.23	46.0774	133.133	1.96322	0.676013	6679.12	3.42659	249.139	133.495	0.414573	0.486255	2.11156	0.535825
	0.303741	0.000343709	0.000213731	0.000445377	3.85521	0.000177318	3.94728	0.0394989	87.8635	2.30258	202.313	0.000117429	88.519	2.28553	2681.15	46.8745	155.361	1.45197	0.767925	8807.91	4.61314	257.864	149.652	0.440534	0.473248	2.63289	0.580352
	0.341728	0.000336392	0.000267767	0.0005117	0.985061	0.000156965	3.16136	0.0545153	275.792	1.84413	508.596	0.00010395	275.928	1.84322	2030.16	47.9197	337.356	1.38871	0.663308	13446.4	6.01751	215.834	1669.82	0.399572	0.345201	1.87962	7.73657
	0.332752	0.000255872	0.000281165	0.000368918	5.06688	0.000157762	3.96081	0.0259683	67.0076	2.31047	154.819	0.000104478	67.8644	2.2813	2578.24	49.2825	117.794	1.17593	0.760847	7735.05	3.57384	286.015	86.6237	0.439936	0.56455	2.33818	0.302865
	0.315282	0.000256482	0.000200369	0.00044906	1.93547	0.000155197	3.83222	0.0467646	170.103	2.23546	380.259	0.000102779	170.426	2.23123	2559.85	47.8835	275.734	1.51544	0.725121	16363.7	5.37897	261.24	571.298	0.435616	0.541887	2.24967	2.18688
	0.332591	0.000340509	0.000155652	0.000522493	2.1106	0.000162426	2.66404	0.041924	108.431	1.55402	168.504	0.000107567	108.675	1.55053	1734.54	45.2224	98.4105	1.86104	0.584026	3243.19	3.36315	161.981	300.098	0.391486	0.296855	1.63616	1.85267
	0.35339	0.000307436	8.88285e-05	0.000515477	3.2615	0.000138319	3.86243	0.0515694	101.669	2.25308	229.068	9.16021e-05	102.213	2.24108	2436.43	44.1806	145.003	2.56885	0.633013	5577	3.4765	224.151	184.33	0.39655	0.404691	2.01387	0.822348
	0.285254	0.000230076	0.000156569	0.000470359	1.67987	0.000127511	4.10741	0.0728179	210.079	2.39599	503.348	8.44446e-05	210.379	2.39257	2863.99	48.0647	343.885	1.75693	0.683195	15843.3	4.93545	282.123	763.801	0.40926	0.532209	1.98201	2.70733
	0.352033	0.00025788	0.00023691	0.000496935	3.09466	0.000149432	3.22885	0.053423	89.5833	1.8835	168.73	9.89614e-05	90.0156	1.87445	2041.05	47.7353	109.699	1.50776	0.650144	5296.95	3.26674	218.748	177.863	0.412	0.435951	1.81974	0.813096
	0.314822	0.000343095	0.000163245	0.000475642	3.81475	0.000157612	3.03484	0.0597163	68.2718	1.77032	120.863	0.000104379	68.7706	1.75748	2028.58	45.7756	74.9342	1.74402	0.619992	2566.21	2.84775	189.07	105.168	0.394234	0.324045	1.79959	0.556239
	0.305194	0.000321688	0.000174464	0.000439741	2.07191	0.000130644	3.78704	0.0637465	157.02	2.20911	346.873	8.65193e-05	157.361	2.20432	2566.94	48.0137	230.001	1.60542	0.66307	7526.56	4.13548	259.566	430.857	0.381015	0.359309	1.87093	1.65991
	0.310164	0.000263694	0.000190898	0.000463053	3.33483	0.000181513	3.80001	0.013592	97.8214	2.21667	216.838	0.000120207	98.369	2.20433	2557.31	46.5695	164.377	1.56868	0.758063	12332.5	4.85734	245.023	204.193	0.466846	0.609008	2.59942	0.833363
	0.375175	0.000392462	0.000161391	0.000406215	4.88312	0.000129272	3.64257	0.0577643	63.9545	2.12483	135.893	8.56105e-05	64.715	2.09986	2220.34	46.6896	85.0698	1.7334	0.626007	2279.25	2.48864	236.084	70.1487	0.359669	0.277611	1.76355	0.297134
	0.325096	0.000369295	0.0001979	0.00045574	2.80967	0.00017294	3.85198	0.040485	117.732	2.24699	264.543	0.00011453	118.201	2.23807	2536.17	46.5501	197.157	1.55007	0.745274	9961.88	5.06841	248.166	267.196	0.427505	0.420663	2.51455	1.07668
	0.2898	0.00028635	0.00017733	0.000446443	2.32275	0.000154705	3.93655	0.0425961	145.576	2.29632	334.288	0.000102454	145.973	2.29007	2727.39	47.392	242.67	1.58693	0.725929	12543.2	5.03019	262.872	399.803	0.427563	0.496588	2.30169	1.52091
	0.336169	0.000229356	0.000209972	0.000471861	3.26762	0.000149295	3.47939	0.0513378	91.4143	2.02964	185.539	9.88706e-05	91.9058	2.01879	2253.27	47.6455	124.892	1.57483	0.673134	7097.9	3.48244	234.836	178.468	0.427811	0.52743	1.95807	0.759968
	0.321373	0.00021078	0.000155103	0.000344113	2.19526	0.000125847	4.37169	0.0239579	171.066	2.55015	436.244	8.33421e-05	171.483	2.54395	2894.22	49.5588	314.802	1.49577	0.721619	17787.7	4.66049	319.234	486.87	0.418747	0.609622	2.0799	1.52512
	0.335361	0.000251083	0.000243202	0.000407605	1.36115	0.000126856	3.53043	0.0601226	222.871	2.05942	458.984	8.40107e-05	223.081	2.05748	2289.1	49.9814	301.607	1.32789	0.657118	12125.1	4.59836	262.217	951.291	0.389268	0.417224	1.69566	3.62787
	0.333502	0.000356415	0.000141854	0.000437737	3.99681	0.000143084	4.47782	0.0888527	96.1308	2.61206	251.1	9.47577e-05	96.901	2.5913	2911.51	46.1892	181.741	1.87036	0.72378	7546.78	4.02614	284.031	144.385	0.402792	0.417535	2.4088	0.508342
	0.321725	0.000206248	0.000235518	0.000567441	3.72225	0.000147941	4.2237	0.0395217	97.3843	2.46382	239.938	9.7974e-05	98.0621	2.44679	2794.8	46.9569	174.442	1.81349	0.727032	12635.8	4.07835	276.892	176.223	0.451849	0.704423	2.35167	0.636432
	0.361698	0.000229312	0.000163838	0.000479555	3.30106	0.000171151	3.89678	0.0623656	101.341	2.27312	230.36	0.000113345	101.897	2.26072	2426.52	46.3046	170.748	1.74545	0.741223	14435.9	4.66798	248.412	214.487	0.468547	0.677232	2.51373	0.863435
	0.313197	0.000303674	9.86347e-05	0.000478966	1.74632	0.000172974	4.48422	0.0119898	220.619	2.6158	577.095	0.000114552	220.96	2.61176	3004.49	44.1589	440.792	2.32801	0.763812	29547.7	7.57998	259.981	865.145	0.458888	0.597097	2.93499	3.32772
	0.331215	0.000215362	0.000246368	0.000445505	4.29724	0.000145799	4.11069	0.0313958	82.0586	2.3979	196.769	9.65555e-05	82.8172	2.37594	2681.97	48.4263	144.325	1.47139	0.733478	9853.78	3.65592	286.612	125.701	0.441798	0.645594	2.25051	0.438576
	0.354966	0.000294199	0.000164426	0.000530161	1.53972	0.000143062	3.137	0.0704644	175.059	1.82992	320.343	9.47433e-05	175.269	1.82772	1974.01	46.5966	196.426	1.79565	0.613173	7312.33	4.18501	202.507	663.602	0.391086	0.356725	1.69874	3.27693
	0.323747	0.000253969	0.000162248	0.000422645	3.86551	0.000166021	3.85257	0.0374929	85.526	2.24733	192.205	0.000109948	86.1674	2.2306	2541.63	46.795	140.854	1.61474	0.73283	9503.17	4.11262	250.823	148.62	0.450659	0.585253	2.4059	0.59253
	0.31124	0.000262707	0.00019516	0.000419339	3.56376	0.000161502	3.87291	0.00510638	93.2787	2.2592	210.735	0.000106955	93.8744	2.24486	2602.3	47.6608	155.63	1.47117	0.73851	9677.98	4.20529	261.563	172.555	0.442197	0.553906	2.35537	0.659705
	0.32233	0.000383206	0.000270246	0.000403933	2.90903	0.000153759	3.87933	0.0764909	114.511	2.26294	259.133	0.000101827	115	2.25333	2564.65	48.8523	191.757	1.23604	0.739995	7764.77	4.44413	275.262	235.223	0.400641	0.362887	2.2509	0.854543
	0.319703	0.000318468	0.000223198	0.000449338	2.51051	0.000136862	3.24925	0.0312571	111.162	1.89539	210.696	9.06371e-05	111.516	1.88938	2156.42	48.4703	133.643	1.41889	0.634291	4280.05	3.30238	226.961	250.21	0.378783	0.325893	1.67994	1.10243
	0.300513	0.000316714	0.000171945	0.000446543	4.69263	0.000152694	4.38097	0.0574486	80.0563	2.55557	204.589	0.000101122	80.9366	2.52777	2989.52	46.8871	153.365	1.62594	0.749626	7678.12	3.94691	286.348	107.626	0.423558	0.489139	2.50757	0.375857
	0.341386	0.0002716	0.000303146	0.000400383	3.44031	0.000171813	3.10454	0.0831739	77.4625	1.81098	140.283	0.000113784	77.9238	1.80026	1994.72	48.667	97.7123	1.18505	0.696535	5698.78	3.54489	218.617	145.552	0.433559	0.457091	2.00949	0.665782
	0.32056	0.00028228	0.000113944	0.000428188	2.58843	0.000156113	4.41115	0.0657134	146.364	2.57317	376.619	0.000103386	146.859	2.5645	2923.85	45.7677	280.668	1.99713	0.745231	16928.6	5.45891	274.719	371.581	0.44051	0.569245	2.60095	1.35259
	0.302854	0.000244998	0.00019162	0.000427416	2.39953	0.000203391	4.19009	0.062476	149.988	2.44422	366.603	0.000134696	150.424	2.43713	2849.7	46.6163	309.635	1.51157	0.844606	34472.2	7.47012	270.718	477.545	0.512085	0.812056	3.22034	1.76399
	0.30448	0.000359339	0.000109885	0.000557344	2.75262	0.000162447	3.23588	0.0236117	100.955	1.8876	190.561	0.000107581	101.341	1.8804	2195.6	43.489	117.871	2.41058	0.618545	4114.1	3.68116	181.957	220.122	0.402364	0.34119	1.98451	1.20975
	0.283336	0.000428025	0.000222818	0.000394806	3.23502	0.000169362	3.35471	0.0742164	89.0288	1.95692	174.222	0.00011216	89.4981	1.94666	2345.43	46.8584	120.63	1.42168	0.692391	4153.19	3.88252	219.002	163.866	0.3993	0.309154	2.14189	0.748238
	0.311656	0.000245113	0.000143583	0.000441133	3.60167	0.000132106	3.01952	0.0838705	71.9574	1.76139	126.745	8.74876e-05	72.4266	1.74998	2027.66	47.132	73.9154	1.75341	0.583183	2542.27	2.37062	199.428	114.91	0.385798	0.378554	1.50192	0.576195
	0.33549	0.000238518	0.0001992	0.000420381	3.86732	0.00015549	3.75895	0.0333265	83.4085	2.19272	182.892	0.000102973	84.0346	2.17638	2436.8	47.8546	131.023	1.47993	0.716397	8383.55	3.7149	255.936	141.276	0.439472	0.56945	2.19852	0.551997
	0.39701	0.000365234	0.000139244	0.000432409	4.71964	0.000137463	4.73302	0.0816276	85.9924	2.76093	237.419	9.1035e-05	86.9487	2.73056	2784.2	46.1604	172.788	1.90345	0.727779	7499.1	3.7715	299.843	107.638	0.396643	0.412482	2.43854	0.35898
	0.380101	0.000239622	0.000205816	0.000424236	4.74791	0.00017266	3.46272	0.0522741	62.5363	2.01992	126.318	0.000114344	63.24	1.99744	2094.06	47.0657	89.8493	1.46734	0.711293	6802.3	3.41602	228.057	89.119	0.454296	0.577667	2.24057	0.390775
	0.319806	0.000204068	0.000169738	0.000341477	3.20641	0.000155256	3.35511	0.03864	89.8357	1.95715	175.822	0.000102818	90.3009	1.94707	2226.34	48.2589	120.054	1.4378	0.682815	7908.01	3.55065	232.316	185.25	0.443388	0.594556	1.96391	0.797404
	0.294905	0.000244039	0.000124585	0.00034708	2.12441	0.000144531	3.22117	0.0535724	130.254	1.87902	244.75	9.57161e-05	130.552	1.87474	2215.71	47.2358	154.866	1.69052	0.632753	6740.36	3.75415	213.685	375.098	0.410008	0.445638	1.76033	1.75538
	0.318548	0.000246155	0.000167534	0.000447518	5.58595	0.000171177	3.26195	0.0588719	50.0282	1.9028	95.194	0.000113362	50.8027	1.8738	2168.53	45.9467	63.7469	1.64366	0.669653	3830.89	2.85264	204.74	59.1252	0.443646	0.522996	2.08382	0.288781
	0.341445	0.000296077	0.00016002	0.000526043	3.98726	0.000167326	3.64419	0.0142447	78.4221	2.12578	166.708	0.000110812	79.0475	2.10896	2341.24	45.5916	116.19	1.81348	0.696967	6457.87	3.76459	225.211	127.16	0.433802	0.478372	2.29257	0.564627
	0.310594	0.00023067	0.000167178	0.000505269	5.03263	0.000143577	3.99982	0.0395293	68.1304	2.33323	158.964	9.50842e-05	68.9901	2.30416	2690.1	46.7356	109.965	1.78512	0.691763	6151.24	3.14257	259.749	86.5466	0.429364	0.575633	2.14926	0.333193
	0.295577	0.000181038	0.000219744	0.000515649	2.19397	0.000180302	3.78874	0.0454645	148.342	2.2101	327.851	0.000119405	148.704	2.20473	2603.64	46.0849	245.146	1.83607	0.747735	25701.9	5.89228	239.237	506.561	0.502125	0.8813	2.58254	2.1174
	0.29318	0.000273308	0.000123721	0.000487224	0.766259	0.000149949	3.33887	0.0443825	374.466	1.94768	729.339	9.9304e-05	374.578	1.9471	2302.3	45.7958	464.443	1.99588	0.6368	19553.7	6.74499	208.195	3002.62	0.411616	0.428763	1.89681	14.4222
	0.267948	0.000251567	0.000171124	0.000414893	3.58889	0.000150462	3.24251	0.0425324	77.5473	1.89146	146.678	9.96439e-05	78.0494	1.8793	2315.66	47.4002	95.141	1.55966	0.648639	4200.37	3.06325	216.6	133.841	0.415483	0.451137	1.83703	0.617917
	0.302732	0.000377919	0.000188457	0.000417291	2.69865	0.000149983	3.9568	0.0462764	125.918	2.30813	290.636	9.93263e-05	126.381	2.29968	2691.51	47.2911	207.728	1.55476	0.714735	7796.86	4.51191	263.1	277.349	0.398482	0.36631	2.24078	1.05416
	0.311695	0.000286296	0.000136341	0.000506206	2.95341	0.000146513	2.55753	0.0300558	74.3576	1.49189	110.934	9.70287e-05	74.6847	1.48536	1717.33	45.5379	60.6459	1.93399	0.546686	1805.28	2.38149	157.683	143.217	0.381401	0.305093	1.41384	0.908264
	0.363202	0.000253294	0.000188793	0.000405905	2.34114	0.000191253	3.28082	0.0442728	120.372	1.91381	230.37	0.000126658	120.706	1.90852	2038.15	46.765	167.499	1.47208	0.727085	13718.5	5.16637	213.325	360.35	0.469754	0.57839	2.37137	1.6892
	0.306371	0.00024835	0.000145863	0.000475706	3.04286	0.000134275	3.99498	0.0671489	112.73	2.33041	262.706	8.89238e-05	113.256	2.31958	2703.3	47.2645	178.327	1.80904	0.678811	8264.68	3.74262	265.34	226.891	0.41065	0.50336	2.02347	0.855095
	0.340437	0.000244966	0.000201423	0.000502873	2.08043	0.000127564	3.76177	0.0378922	155.333	2.19436	340.856	8.44798e-05	155.673	2.18957	2420.47	48.3734	224.25	1.6345	0.657903	9685.73	3.98719	261.711	442.343	0.397047	0.457637	1.8146	1.69019
	0.316302	0.000340742	0.000208716	0.000392864	0.683404	0.000133424	3.86939	0.0273372	486.584	2.25714	1098.29	8.83605e-05	486.699	2.25661	2580.82	49.0529	760.744	1.39276	0.692663	26105	7.68114	276.815	4066.88	0.382653	0.354654	1.95606	14.6917
	0.360502	0.000236022	0.000174316	0.000405866	2.07031	0.000197828	4.19852	0.0737974	174.215	2.44913	426.675	0.000131012	174.593	2.44383	2619.31	46.7251	356.73	1.5368	0.836069	42765.6	7.79884	272.53	639.375	0.509211	0.822143	3.14089	2.34607
	0.357566	0.000266277	0.000232529	0.000405693	2.07034	0.00013657	2.80648	0.0806361	116.452	1.63711	190.645	9.04437e-05	116.704	1.63357	1758.91	49.0596	113.686	1.33435	0.596324	4022.21	3.03934	200.829	319.802	0.381038	0.336279	1.44939	1.59241
	0.323785	0.0002666	0.000191352	0.000427205	4.90697	0.000156701	3.6422	0.0622844	63.6357	2.12462	135.202	0.000103776	64.3997	2.09941	2402.71	47.3064	94.4057	1.49783	0.698259	5120.6	3.17792	242.338	82.6155	0.4278	0.495279	2.13729	0.34091
	0.320385	0.000281072	0.000207666	0.000475501	3.06397	0.000118239	3.80026	0.0446545	106.495	2.21682	236.079	7.83041e-05	106.999	2.20638	2519.58	49.0327	152.151	1.52261	0.644492	4865.43	3.04418	271.645	192.919	0.372178	0.372532	1.69486	0.710189
	0.283436	0.000300961	0.000184458	0.00041775	4.89639	0.000142763	3.11503	0.0260016	54.5432	1.8171	99.1105	9.45453e-05	55.1953	1.79563	2177.56	47.3581	61.1565	1.50982	0.617053	1970.83	2.33029	207.715	64.0791	0.38629	0.341872	1.66543	0.308495
	0.292291	0.000271555	0.000206517	0.000471851	1.97682	0.000151423	3.51758	0.0616462	152.868	2.05192	313.675	0.00010028	153.171	2.04787	2428.57	47.7579	214.676	1.52626	0.684391	10144.6	4.63079	238.536	482.519	0.418157	0.458328	2.01459	2.02284
	0.319395	0.000266333	0.000131453	0.000572015	2.69144	0.000154787	3.67196	0.045512	117.168	2.14197	250.97	0.000102508	117.596	2.13417	2438.06	45.3113	168.198	2.08691	0.670191	8691.72	4.19001	224.144	277.757	0.427724	0.497825	2.14612	1.23919
	0.343895	0.000280676	0.000115634	0.000394337	5.42435	0.000150063	3.29018	0.0562354	51.9739	1.91927	99.7521	9.93795e-05	52.7336	1.89162	2105.93	45.3692	62.051	1.91611	0.622053	2604.35	2.46729	201.354	57.8255	0.405494	0.405922	1.84417	0.287183
	0.297461	0.000277673	0.000212656	0.000390568	3.09075	0.000154161	3.62121	0.0646887	100.596	2.11237	212.497	0.000102093	101.081	2.10225	2481.85	48.444	150.811	1.35616	0.709709	7556.17	3.9515	252.668	204.785	0.421894	0.46845	2.10548	0.810489
	0.313067	0.000274996	0.000104147	0.000531847	3.14771	0.00018919	3.4414	0.0589535	93.8678	2.00748	188.438	0.000125292	94.3364	1.99751	2306.22	43.4808	129.62	2.28724	0.687865	8612.7	4.49579	193.441	206.123	0.463495	0.551569	2.45516	1.06556
	0.320219	0.000288795	0.00014742	0.000437253	3.46945	0.000157398	3.3133	0.0749012	81.9751	1.93276	158.438	0.000104237	82.4715	1.92112	2197.26	46.2202	103.629	1.73653	0.654065	4683.52	3.34434	210.446	146.287	0.415258	0.420246	1.96448	0.695127
	0.32912	0.000296128	9.2926e-05	0.000462618	2.88171	0.00014884	3.54931	0.0480162	105.765	2.07043	218.978	9.85697e-05	106.208	2.06179	2322.95	44.371	138.514	2.37447	0.632548	5709.87	3.65627	207.759	223.204	0.407737	0.415934	1.99369	1.07434
	0.295045	0.000296312	0.000211496	0.000452806	2.97958	0.000105152	3.95624	0.0464689	114.012	2.30781	263.118	6.96372e-05	114.522	2.29752	2720.8	49.9829	166.35	1.46459	0.632225	4084.86	2.83074	293.862	199.821	0.35014	0.327242	1.56953	0.679984
	0.313996	0.000273869	9.66834e-05	0.000434738	4.64383	0.000116705	3.56565	0.0266679	65.8452	2.07996	136.956	7.72881e-05	66.5545	2.0578	2386.26	45.9183	79.309	2.21002	0.579086	2180.99	2.16931	223.526	77.2725	0.365875	0.351956	1.56021	0.345698
	0.337051	0.000290237	0.000275538	0.000452645	4.59959	0.000142774	3.59431	0.0422081	67.0156	2.09668	140.51	9.45521e-05	67.724	2.07475	2324.6	48.792	96.023	1.30646	0.683388	4134.99	2.92016	254.408	86.9617	0.40069	0.409638	1.92445	0.34182
	0.352322	0.000299036	0.000231909	0.000514748	1.61468	0.000155601	3.88401	0.0293315	206.677	2.26567	468.263	0.000103047	206.95	2.26268	2454.1	47.7546	341.457	1.50541	0.729199	18691.1	6.0014	263.348	810.429	0.424255	0.472556	2.28734	3.07741
	0.364188	0.000259816	0.000208295	0.000472071	2.08586	0.000133873	3.58209	0.0417266	147.527	2.08955	308.266	8.86575e-05	147.852	2.08496	2221.86	48.4639	203.119	1.53215	0.658909	9015.52	3.98235	250.145	420.097	0.398069	0.431185	1.81335	1.67941
	0.324984	0.000258664	0.000199074	0.000466382	4.07894	0.000140373	3.71174	0.0583586	78.0745	2.16518	169.046	9.29624e-05	78.7257	2.14727	2444.24	47.8674	114.325	1.55119	0.676296	5336.62	3.13275	252.857	116.849	0.40964	0.467708	1.95823	0.462117
	0.339231	0.000236985	0.000260985	0.00044094	1.84881	0.000164486	3.68389	0.0554633	171.189	2.14894	367.875	0.000108931	171.486	2.14522	2374.7	48.3344	271.813	1.38433	0.738872	19725.3	5.66025	255.881	624.643	0.452066	0.597614	2.29242	2.44115
	0.328096	0.000141762	0.000196127	0.000466492	2.36832	0.000152968	3.89706	0.0864986	141.339	2.27328	321.304	0.000101303	141.74	2.26686	2554.44	46.6194	226.99	2.00674	0.706465	23844.7	4.81034	251.818	434.799	0.488334	0.981762	2.25277	1.72664
	0.315554	0.000280371	0.000174557	0.000380169	2.10037	0.000158975	3.79728	0.0713968	155.309	2.21508	344.021	0.000105282	155.655	2.21014	2535.5	47.7789	250.73	1.48107	0.728824	14117.9	5.25417	257.728	476.9	0.432239	0.502986	2.28267	1.8504
	0.29178	0.000390477	0.000189878	0.00046769	4.27164	0.000147881	3.28062	0.0405649	65.8823	1.91369	126.079	9.79345e-05	66.4842	1.89637	2266.6	46.4616	79.8298	1.6271	0.633175	2236.56	2.75782	210.553	86.7789	0.377615	0.288256	1.82191	0.412147
	0.319326	0.000218959	0.000170479	0.000475145	3.80727	0.000159407	3.83326	0.0356462	86.4031	2.23607	193.203	0.000105568	87.032	2.21991	2545.42	46.7061	138.141	1.7272	0.715001	9837.45	3.91056	248.619	153.741	0.454481	0.648664	2.29898	0.61838
	0.298563	0.000207234	0.000260379	0.000372645	3.95982	0.000149787	3.11649	0.0369093	67.5324	1.81795	122.771	9.91969e-05	68.0636	1.80376	2132.59	48.998	80.466	1.29704	0.655416	4419.33	2.80448	222.454	108.596	0.427241	0.52328	1.75528	0.488174
	0.309977	0.000240235	0.000178832	0.00044907	4.93611	0.000136565	4.21473	0.0517803	73.2019	2.45859	179.974	9.04403e-05	74.091	2.42909	2837.17	47.839	127.613	1.60633	0.709062	6688.68	3.22001	286.782	92.7103	0.419826	0.554223	2.15513	0.323278
	0.334878	0.000266704	0.000126495	0.000416913	2.37009	0.000173534	3.53372	0.0812537	128.066	2.06134	263.987	0.000114923	128.43	2.0555	2292.9	45.6542	185.236	1.83581	0.701686	11940.3	4.92966	218.983	362.352	0.449482	0.536797	2.31736	1.6547
	0.312821	0.000326159	0.00021716	0.000455613	4.44509	0.000141833	3.83869	0.0517123	74.0703	2.23923	165.861	9.3929e-05	74.8023	2.21732	2573.38	47.9834	114.855	1.44942	0.692477	4406.97	3.17265	262.775	98.172	0.395457	0.387004	2.04314	0.373598
	0.332527	0.000299201	0.000173834	0.000451547	1.55907	0.000142034	3.69179	0.0688924	203.46	2.15355	438.161	9.40621e-05	203.711	2.1509	2403.94	47.6335	296.868	1.61518	0.677532	12451.9	5.10792	249.047	781.419	0.401216	0.409814	1.98474	3.13764
	0.316739	0.000267478	0.000182623	0.000386279	3.33941	0.000158237	3.91592	0.0502821	100.667	2.28429	229.952	0.000104793	101.232	2.27154	2610.19	47.8854	169.889	1.4544	0.738803	10216.2	4.3049	266.967	196.546	0.437264	0.539361	2.33518	0.73622
	0.320652	0.000235596	0.000189235	0.000504374	3.84783	0.000169025	3.83203	0.0482088	85.462	2.23535	191.037	0.000111937	86.0972	2.21886	2539.65	46.4455	139.835	1.69292	0.731975	10361	4.17186	245.773	152.657	0.461122	0.638929	2.43654	0.621129
	0.344981	0.000396051	0.00023445	0.000468545	3.87133	0.000173409	3.75653	0.0618732	83.2682	2.19131	182.467	0.000114841	83.8946	2.17495	2400.45	46.8103	134.989	1.43616	0.7398	6415.97	4.20526	244.731	134.421	0.419287	0.382217	2.45027	0.54926
	0.336788	0.000219835	0.000155467	0.000417936	0.934169	0.000133977	2.99535	0.069151	275.548	1.74729	481.463	8.87264e-05	275.67	1.74652	1937.99	47.9216	287.214	1.65758	0.596546	12003.7	4.73919	204.516	1750.71	0.397635	0.427213	1.52018	8.56027
	0.261133	0.000212589	0.00014141	0.000476043	0.603686	0.00013665	3.47359	0.0560989	494.499	2.02626	1001.98	9.04964e-05	494.59	2.02589	2503.78	47.1545	639.745	1.87131	0.638478	29475.5	7.21411	229.637	5092.63	0.416492	0.522663	1.79852	22.1769
	0.31945	0.000252764	0.000178734	0.000386343	3.84967	0.000157866	3.35203	0.0840635	74.7211	1.95535	146.106	0.000104547	75.277	1.94091	2225.46	47.5831	99.0326	1.47133	0.677814	5337.08	3.27905	225.648	123.769	0.427807	0.486537	1.9906	0.548503
	0.323714	0.000224371	0.000159328	0.000442611	2.79065	0.00015858	3.87371	0.0353794	119.204	2.25966	269.361	0.00010502	119.673	2.25082	2555.7	47.0367	194.795	1.69045	0.723173	13814.6	4.61963	254.811	288.496	0.452793	0.638499	2.31889	1.1322
	0.279491	0.000280513	0.000203798	0.000471931	1.53881	0.000165635	3.35934	0.0462487	187.577	1.95961	367.578	0.000109692	187.802	1.95726	2361.27	47.1979	254.205	1.52941	0.691569	12919.2	5.51208	222.494	783.537	0.430696	0.46386	2.10617	3.52161
	0.29701	0.00028583	0.000179437	0.000389505	2.75153	0.000150681	3.96492	0.0657801	123.749	2.31287	286.215	9.97887e-05	124.222	2.30407	2719.17	48.0367	208.475	1.47782	0.728385	10539.3	4.54105	272.018	283.434	0.422495	0.487512	2.25551	1.04197
	0.346983	0.000266962	0.000150426	0.000487682	4.36916	0.000125065	3.92474	0.027356	77.052	2.28943	176.405	8.28244e-05	77.7881	2.26777	2500.27	47.314	114.388	1.80075	0.648438	4426.12	2.79188	261.221	102.026	0.388303	0.426406	1.84258	0.390573
	0.320304	0.000313493	0.000197487	0.000402228	1.81214	0.000133957	3.77722	0.06305	179.081	2.20338	394.583	8.8713e-05	179.379	2.19972	2504.61	48.8076	269.031	1.43523	0.681812	9853.92	4.58603	267.525	571.761	0.387709	0.377262	1.91436	2.13722
	0.344609	0.000210687	0.00021707	0.000429146	3.97005	0.000151776	2.77798	0.0718477	60.0414	1.62049	97.2961	0.000100514	60.5161	1.60777	1776.16	47.5944	58.8677	1.50374	0.605036	3025.47	2.43059	187.093	94.4193	0.418895	0.464868	1.58533	0.504664
	0.354846	0.000206147	0.000198809	0.00049144	2.62049	0.000150459	3.06361	0.0650329	100.406	1.7871	179.436	9.96418e-05	100.755	1.78093	1928.18	47.0411	112.443	1.71042	0.626645	6483.91	3.33009	201.561	244.702	0.428119	0.521707	1.74083	1.21403
	0.317954	0.000323965	0.000232021	0.000445521	2.78018	0.000149996	3.63568	0.00887753	112.302	2.12082	238.171	9.93352e-05	112.74	2.11257	2419.09	48.2585	166.503	1.38574	0.699087	6986.39	4.03982	251.74	243.432	0.404025	0.392585	2.05866	0.967001
	0.30896	0.000254697	0.000186909	0.000381112	5.42436	0.000147926	3.56212	0.019292	56.2696	2.0779	116.923	9.79644e-05	57.0921	2.04797	2401.4	47.8746	79.2867	1.42951	0.678112	3865.25	2.74926	242.737	64.3912	0.417065	0.477402	1.96816	0.265271
	0.270444	0.000261062	0.000290403	0.000446695	2.51812	0.000171618	3.90121	0.0507954	133.063	2.27571	302.812	0.000113654	133.489	2.26844	2776.58	48.4357	235.502	1.30502	0.777716	16184.8	5.49706	272.112	360.887	0.457797	0.598528	2.52919	1.32624
	0.35564	0.000234572	0.000190855	0.000482553	4.80553	0.00015189	3.48581	0.0546187	62.1951	2.03339	126.467	0.000100589	62.9118	2.01022	2191.21	46.9078	84.3568	1.64311	0.667027	4870.5	2.91179	228.041	82.579	0.428427	0.522439	1.98365	0.362124
	0.297326	0.000243454	0.000187504	0.000412293	3.40189	0.00015421	3.87653	0.023148	97.8196	2.26131	221.201	0.000102126	98.3893	2.24822	2657.35	47.9126	160.592	1.49595	0.726	9701.35	4.07892	264.582	188.186	0.438931	0.571576	2.25239	0.711258
	0.288919	0.000258454	0.000212684	0.000380205	2.23808	0.000175153	3.76794	0.0780612	144.618	2.19797	317.865	0.000115995	144.984	2.19241	2613.82	48.1016	243.828	1.34314	0.767081	17373.6	5.70862	259.203	443.836	0.460362	0.596344	2.49478	1.71231
	0.34656	0.000344514	0.000192226	0.000460525	3.13946	0.000155861	4.1738	0.0439034	114.145	2.43472	277.911	0.000103219	114.712	2.42269	2660.66	47.1792	207.341	1.56449	0.74607	10326	4.68437	276.217	226.63	0.417978	0.439913	2.45317	0.820479
	0.321973	0.000299976	0.000139788	0.000437741	3.9212	0.000163879	4.09201	0.0526358	89.5474	2.38701	213.75	0.000108529	90.2383	2.36873	2706.67	45.8903	157.274	1.80259	0.735786	9089.83	4.28966	256.21	149.18	0.438286	0.519386	2.52192	0.582257
	0.34799	0.000299292	0.000111763	0.000426172	3.40325	0.000166726	3.65099	0.0407603	92.0917	2.12975	196.132	0.000110415	92.6284	2.11741	2322.29	44.8042	134.364	2.05093	0.685069	7325.34	4.03382	217.905	174.587	0.432712	0.473426	2.2935	0.801207
	0.331992	0.000313975	0.00014032	0.000415229	4.56193	0.00014768	2.81065	0.0643853	52.8387	1.63954	86.6313	9.78016e-05	53.3883	1.62267	1831.64	45.8286	50.0148	1.78003	0.57733	1553.2	2.17993	175.508	65.8982	0.381937	0.306334	1.55684	0.375471
	0.294637	0.000241746	0.000145763	0.000421362	3.37824	0.000147041	3.78397	0.0150677	96.1541	2.20732	212.243	9.73782e-05	96.7063	2.19471	2603.83	47.1656	146.345	1.70074	0.689517	7749.72	3.71277	250.275	181.284	0.427158	0.535791	2.09656	0.72434
	0.372493	0.000292278	0.000109091	0.000377256	3.76679	0.000159309	3.73607	0.0347012	85.1199	2.17937	185.508	0.000105503	85.7264	2.16395	2287.1	45.27	126.89	1.98497	0.684017	6930.41	3.74564	227.643	143.724	0.426675	0.473404	2.23965	0.631355
	0.324782	0.000255971	0.000122301	0.000416192	3.72661	0.000158454	3.49033	0.0431074	80.3812	2.03603	163.658	0.000104936	80.9419	2.02192	2299.13	45.8676	109.343	1.85944	0.668115	5936.07	3.45834	218.322	138.611	0.431094	0.502361	2.08142	0.634893
	0.320763	0.000278507	0.000190986	0.000458981	1.86709	0.000145801	3.22838	0.0337912	148.552	1.88322	279.756	9.65566e-05	148.814	1.8799	2139.23	47.6819	179.718	1.55313	0.64241	7332.7	4.07968	218.228	476.517	0.401349	0.395	1.78068	2.18357
	0.345576	0.000320196	0.000145497	0.00035975	3.96849	0.000189325	3.21541	0.065555	69.5231	1.87566	130.401	0.00012538	70.0724	1.86095	2052.8	45.3377	90.3076	1.66212	0.692535	5247.2	3.75526	196.504	115.68	0.443051	0.441637	2.28894	0.588691
	0.333751	0.000265211	0.000214961	0.000417068	2.64084	0.000129601	3.77356	0.0417596	122.72	2.20124	270.137	8.58287e-05	123.152	2.19352	2452.68	49.309	182.767	1.40318	0.676571	7598.31	3.65704	272.786	273.044	0.393884	0.430228	1.8469	1.00095
	0.321332	0.000294934	0.000202142	0.000426924	2.55567	0.000136653	3.45795	0.0576188	116.209	2.01714	234.41	9.04987e-05	116.592	2.01051	2289.44	48.4819	153.295	1.45328	0.653963	5638.04	3.53147	241.655	263.968	0.389143	0.373886	1.78491	1.09234
	0.313711	0.000299869	0.000193387	0.000383034	2.46268	0.000175821	4.14347	0.0433083	144.512	2.41703	349.288	0.000116438	144.954	2.40964	2774.11	47.586	278.411	1.41398	0.797081	19399	6.1233	278.959	399.371	0.456198	0.567062	2.75243	1.43165
	0.333861	0.00028901	0.000242925	0.000450487	3.11581	0.000135221	3.86	0.0622908	106.366	2.25167	239.5	8.95503e-05	106.886	2.2407	2508.44	49.0819	166.515	1.37422	0.695259	7023.2	3.64201	276.469	202.112	0.397002	0.420779	1.96843	0.731048
	0.304355	0.000330437	0.000159068	0.000434506	2.02484	0.00017704	3.54471	0.0608085	150.391	2.06775	310.971	0.000117245	150.703	2.06347	2405.59	45.8894	221.962	1.69614	0.71377	11605	5.50532	221.934	482.534	0.435391	0.443731	2.37335	2.17423
	0.302088	0.000315746	0.000156143	0.000465549	1.73737	0.00016028	4.08048	0.0563897	201.79	2.38028	480.318	0.000106146	202.099	2.37665	2778.2	46.4513	354.372	1.7483	0.737788	18478.5	6.29767	261.773	745.504	0.430109	0.484223	2.47478	2.8479
	0.334058	0.00029595	0.000169442	0.000414707	1.9763	0.000162486	3.65786	0.0270984	159.007	2.13375	339.281	0.000107606	159.321	2.12954	2376.38	47.0869	241.837	1.57395	0.712792	13155.7	5.27409	241.127	515.186	0.429117	0.469269	2.24798	2.13658
	0.344827	0.000299738	0.000152159	0.000414789	3.30281	0.000145889	3.55028	0.0323661	92.281	2.071	191.114	9.66155e-05	92.7878	2.05969	2269.19	46.9453	126.563	1.67687	0.662241	5352.54	3.4257	232.63	167.675	0.40246	0.402367	1.95217	0.720779
	0.32237	0.000275679	0.000263084	0.000481598	2.78078	0.000202792	3.99777	0.0634674	123.459	2.33203	287.911	0.000134299	123.941	2.32297	2642.79	46.9501	238.755	1.39741	0.829267	23170.3	6.5403	262.004	327.47	0.49449	0.685848	3.06045	1.24987
	0.345939	0.000232976	0.000236027	0.000406107	3.82549	0.000173767	3.91515	0.0583864	87.8273	2.28384	200.583	0.000115077	88.4726	2.26718	2498.15	47.9801	155.451	1.3651	0.774995	13497.5	4.52204	267.972	161.054	0.470627	0.678704	2.55943	0.60101
	0.28514	0.000292945	0.000172508	0.000404866	3.23455	0.000143515	3.94852	0.0581329	104.803	2.3033	241.392	9.50433e-05	105.355	2.29123	2753.64	47.8679	170.515	1.54011	0.706381	7424.56	3.91157	268.992	197.937	0.409669	0.450526	2.13629	0.735847
	0.33509	0.00031531	0.000224611	0.000479241	3.08919	0.00016904	3.94625	0.0700187	109.681	2.30198	252.484	0.000111947	110.209	2.29096	2559.76	47.319	191.33	1.46186	0.757793	11416.1	4.88035	262.708	232.007	0.438164	0.492955	2.51593	0.883134
	0.343196	0.000347037	0.000224738	0.00045894	2.34266	0.000191192	4.13815	0.0618443	151.729	2.41392	366.262	0.000126617	152.15	2.40724	2651.51	46.8547	299.606	1.43332	0.818011	21929.8	6.90742	270.103	446.405	0.461971	0.532294	2.99007	1.65272
	0.336501	0.000260574	7.1263e-05	0.000420902	3.29067	0.000135266	3.97749	0.0403617	103.767	2.3202	240.761	8.95798e-05	104.333	2.30762	2574.55	44.3531	153.532	2.6359	0.637693	6711.46	3.49831	232.635	191.708	0.407703	0.480795	2.02789	0.824071
	0.304852	0.000259499	0.000229291	0.000435035	6.66644	0.000144305	3.97947	0.0428052	51.0716	2.32136	118.555	9.55663e-05	52.1876	2.27171	2698.7	47.9224	83.7121	1.40409	0.706102	4177.63	2.7558	271.719	47.5989	0.4181	0.507036	2.12974	0.175177
	0.326497	0.000315513	0.000228702	0.000449388	2.10004	0.000147674	3.8829	0.0785519	158.835	2.26503	359.766	9.77974e-05	159.19	2.25998	2551.22	48.4644	259.215	1.40194	0.720509	11796.6	4.96255	271.157	461.225	0.408687	0.424552	2.16821	1.70095
	0.312648	0.000313675	0.000175208	0.000427244	2.73381	0.000155757	3.96148	0.089514	124.444	2.31086	287.572	0.00010315	124.913	2.30218	2656.37	47.2409	209.349	1.57618	0.727986	10356.6	4.70385	262.852	286.253	0.421577	0.458823	2.32958	1.08903
	0.357689	0.000260732	0.000147058	0.000532819	3.96155	0.000153221	3.96267	0.0713011	85.8308	2.31156	198.403	0.000101471	86.5066	2.2935	2483.05	45.9506	139.078	1.90827	0.700988	8272.26	3.77153	248.764	139.827	0.433022	0.540954	2.28301	0.562087
	0.314996	0.000218778	0.000192284	0.000353359	4.45064	0.000151568	3.96248	0.0399694	76.3632	2.31145	176.509	0.000100376	77.1197	2.28877	2647.97	48.6296	130.102	1.37647	0.737085	8918.95	3.60846	278.604	113.903	0.445606	0.636424	2.25373	0.408835
	0.325328	0.000288016	0.000148554	0.000412274	4.73862	0.000157438	3.93425	0.0559903	71.1923	2.29498	163.385	0.000104264	71.9903	2.26954	2589.45	46.4332	116.702	1.68511	0.714273	6295.08	3.54993	252.195	95.9856	0.428963	0.497933	2.32135	0.3806
	0.34594	0.000321825	0.00025512	0.00049966	3.02057	0.00014559	3.45597	0.0440342	98.2407	2.01598	198.051	9.64169e-05	98.6926	2.00675	2205.15	48.2044	132.797	1.40702	0.670518	5224.99	3.50183	238.76	191.316	0.394415	0.36437	1.89808	0.80129
	0.287512	0.000309568	0.000203117	0.000380607	2.78658	0.000198335	4.07229	0.0729095	125.498	2.3755	298.122	0.000131348	125.99	2.36623	2830.53	47.0449	247.255	1.37678	0.829378	19841.3	6.50944	267.967	322.168	0.479582	0.608471	3.04894	1.20227
	0.317021	0.000278883	0.000200436	0.000469441	3.35394	0.000147039	3.54359	0.043368	90.6996	2.0671	187.485	9.73768e-05	91.2132	2.05546	2361.04	47.6518	126.394	1.53734	0.674157	5670.05	3.45038	239.232	165.212	0.409723	0.434969	1.96351	0.690592
	0.325417	0.000284099	0.000150049	0.000427081	1.42161	0.000114699	3.94411	0.0579536	238.393	2.30073	548.478	7.59597e-05	238.637	2.29838	2595.59	48.5652	351.955	1.69833	0.641693	10931.8	4.49132	276.578	923.996	0.369189	0.372435	1.71267	3.34082
	0.354526	0.000232258	0.000109754	0.000471147	1.19696	0.000137605	3.28257	0.0521886	235.659	1.91483	451.247	9.11289e-05	235.83	1.91344	2067.02	46.132	274.885	2.07236	0.609168	12426.7	4.7619	207.699	1192.73	0.405885	0.455005	1.71057	5.74257
	0.325758	0.000253418	0.000188761	0.000450004	3.5447	0.00014829	3.49634	0.0158289	84.6631	2.03953	172.673	9.82052e-05	85.198	2.02673	2299.76	47.5809	115.91	1.55914	0.671271	5800.61	3.3323	235.341	148.901	0.418157	0.476002	1.95254	0.632702
	0.354403	0.000290494	0.000170265	0.000437921	3.31098	0.000138994	4.0742	0.0340811	105.637	2.37662	251.059	9.20493e-05	106.22	2.36357	2566	47.7556	176.846	1.60682	0.704399	8298.14	3.85803	276.254	193.31	0.406331	0.453908	2.13431	0.699753
	0.355636	0.000354883	0.000192475	0.000436403	6.31563	0.000175483	3.92051	0.0551585	53.1344	2.28697	121.517	0.000116214	54.1797	2.24284	2464.49	45.8786	90.0066	1.53675	0.740693	4963.21	3.4749	245.347	54.0662	0.432249	0.445131	2.55697	0.220366
	0.292279	0.000261206	0.000263752	0.00037716	2.88846	0.000129712	3.81715	0.0391301	113.48	2.22667	252.681	8.59021e-05	113.957	2.21734	2635.44	50.4467	175.924	1.21713	0.696227	7237.16	3.59099	288.817	232.062	0.396027	0.441945	1.86855	0.803493
	0.324523	0.000250872	0.000209282	0.000430784	1.72825	0.000177404	3.86127	0.109202	191.958	2.25241	432.367	0.000117486	192.248	2.24901	2544.44	47.5293	334.044	1.45794	0.772592	26868.9	6.76762	259.342	776.726	0.468602	0.638323	2.59207	2.99499
	0.340236	0.000271899	0.000169125	0.000384596	2.89858	0.000135236	3.72435	0.0409465	110.334	2.17254	239.704	8.95604e-05	110.801	2.16337	2397.13	48.4066	161.512	1.51108	0.673796	6967.57	3.58729	259.465	226.622	0.399165	0.431873	1.90071	0.873419
	0.315264	0.00038351	0.000170053	0.000464967	3.95958	0.000148638	3.52914	0.0336052	76.4787	2.05866	157.444	9.8436e-05	77.0803	2.0426	2357.45	46.1454	103.02	1.73382	0.654329	3289.12	3.14893	223.431	111.054	0.385778	0.317743	1.97245	0.497041
	0.285034	0.000209325	0.000161204	0.000456665	2.17025	0.000155045	3.57112	0.0539894	141.352	2.08315	294.457	0.000102679	141.688	2.0782	2490.81	46.9948	202.142	1.74006	0.68649	12836.9	4.60106	234.488	434.396	0.446997	0.617825	2.09333	1.85253
	0.295547	0.000264966	8.68753e-05	0.000460551	1.36685	0.000141891	3.74662	0.029635	235.531	2.18553	514.759	9.39674e-05	235.754	2.18346	2574.8	44.9123	331.154	2.39405	0.643319	14199.8	5.3894	224.692	1059.98	0.412151	0.469298	2.01275	4.71748
	0.307617	0.000399418	0.000248531	0.000460778	2.15752	0.000178017	3.63728	0.0576451	144.82	2.12175	307.272	0.000117892	145.161	2.11676	2456.83	47.1652	228.94	1.38037	0.745073	10603	5.62202	240.568	423.108	0.422459	0.378655	2.44807	1.75879
	0.286509	0.000231773	0.000213198	0.000463255	3.01159	0.000152719	3.5576	0.0404068	101.432	2.07527	210.498	0.000101139	101.896	2.06582	2476.27	47.7373	145.248	1.54293	0.690021	8160.24	3.84167	241.04	217.945	0.433881	0.546339	2.04964	0.904184
	0.320544	0.000322347	0.00014858	0.000473125	3.11716	0.000153353	3.73445	0.0478298	102.861	2.17843	224.076	0.000101558	103.365	2.16782	2475.37	46.0794	153.205	1.81864	0.683716	6635.38	3.96186	235.754	202.219	0.410924	0.413932	2.15976	0.857755
	0.338681	0.000140313	0.000251703	0.000501149	2.85685	0.00017261	3.44109	0.0525351	103.434	2.0073	207.623	0.000114311	103.86	1.99907	2220.03	45.576	143.044	2.06455	0.688961	16910.6	4.30895	212.514	273.633	0.506705	0.987039	2.24174	1.2876
	0.3116	0.000376383	0.000193774	0.000399677	3.18451	0.000175299	3.41574	0.0279785	92.089	1.99251	183.489	0.000116092	92.5595	1.98239	2293.92	46.4731	129.362	1.50214	0.705012	5706.32	4.16152	219.334	180.411	0.418359	0.370575	2.25766	0.822542
	0.317817	0.000224395	0.00021045	0.00054281	3.11603	0.000182019	4.00861	0.0363522	110.453	2.33836	258.279	0.000120542	110.993	2.32697	2667.76	46.095	199.392	1.74263	0.772003	18691.2	5.36465	253.233	258.068	0.488191	0.757587	2.75169	1.01909
	0.342384	0.000280328	0.000104889	0.00051779	2.91659	0.000127147	3.64899	0.0299922	107.432	2.12858	228.678	8.42033e-05	107.893	2.11948	2340.97	45.6205	139.368	2.25985	0.609452	4774.8	3.13299	225.793	210.475	0.383107	0.385841	1.75077	0.932161
	0.349527	0.000274403	0.000147554	0.000376493	2.70334	0.000160028	3.28712	0.0289777	104.425	1.91749	200.234	0.000105979	104.81	1.91044	2085.92	46.8433	133.463	1.61586	0.666537	6927.98	3.85877	214.451	243.646	0.422843	0.447178	1.9862	1.13613
	0.309847	0.000240295	0.000233727	0.000444464	1.86549	0.000129383	4.17933	0.0449562	192.475	2.43794	469.243	8.5684e-05	192.814	2.43366	2813.87	49.4959	335.387	1.43888	0.71474	16518.2	4.94562	304.413	631.32	0.410038	0.525933	2.04563	2.0739
	0.328193	0.00030452	0.000172148	0.000467466	2.38687	0.000170555	3.29574	0.0558601	118.6	1.92251	228.011	0.00011295	118.942	1.91699	2159.98	46.2495	155.173	1.65202	0.680551	7915	4.43449	209.596	317.229	0.427928	0.430931	2.12411	1.51352
	0.317455	0.00021956	0.000163694	0.000450151	1.79042	0.000166307	3.66025	0.0575568	175.642	2.13514	375.021	0.000110137	175.927	2.13168	2437.22	46.828	269.085	1.69576	0.717519	20083.3	5.69411	238.638	674.87	0.460988	0.648065	2.30316	2.82801
	0.319127	0.000398951	0.00016223	0.000458962	1.85476	0.000133408	3.53537	0.058926	163.761	2.0623	337.723	8.83499e-05	164.046	2.05871	2348.3	46.6451	212.455	1.8048	0.629081	5414.78	4.05871	228.699	479.38	0.363841	0.276311	1.78431	2.09612
	0.325654	0.000300968	0.000116181	0.000470876	4.30669	0.000157848	3.67986	0.0592886	73.2963	2.14658	157.337	0.000104535	73.9769	2.12683	2420.84	44.8293	105.169	2.07752	0.668435	4949.16	3.37873	219.873	106.632	0.420503	0.447703	2.18104	0.484969
	0.329558	0.000244558	0.000194216	0.000455915	3.1595	0.000155768	4.11716	0.0229029	111.88	2.40168	268.7	0.000103158	112.443	2.38966	2692.84	47.6451	201.004	1.56173	0.748061	13673.6	4.60948	277.876	235.657	0.446261	0.610903	2.41828	0.848065
	0.339204	0.000325066	0.000112252	0.000495228	1.83346	0.000160756	4.04466	0.0646064	189.53	2.35938	447.173	0.000106461	189.852	2.35537	2607.36	44.6653	316.28	2.20967	0.707287	16216.1	5.96726	239.905	659.398	0.427457	0.467515	2.45992	2.74858
	0.337199	0.00022818	0.000133803	0.000452648	4.08722	0.000128329	3.82644	0.0329517	80.3236	2.23209	179.29	8.49864e-05	80.9963	2.21355	2474.17	47.2332	116.151	1.84454	0.64784	5321.3	2.88675	253.81	118.338	0.404065	0.499663	1.84548	0.466249
	0.303604	0.000320785	8.70895e-05	0.000451994	3.68891	0.000195348	3.74144	0.0688782	87.0469	2.1825	189.98	0.000129369	87.642	2.16768	2541.83	42.4193	134.954	2.54621	0.710358	8543.19	4.73666	200.163	163.206	0.463965	0.529821	2.75104	0.815366
	0.341629	0.000268904	7.88912e-05	0.000450994	3.29491	0.000156912	3.70807	0.0484654	96.6139	2.16304	208.98	0.000103915	97.1419	2.15128	2381.61	43.7489	136.697	2.54285	0.654117	7220.86	3.8292	211.008	188.133	0.430279	0.503843	2.19304	0.891588
	0.350892	0.000287504	0.000224452	0.000404197	2.06507	0.000162224	3.67922	0.0352445	153.055	2.14621	328.488	0.000107433	153.385	2.14159	2329.83	48.348	240.899	1.3434	0.733358	14242	5.25538	255.7	477.452	0.431725	0.485006	2.25706	1.86723
	0.293269	0.000333318	0.000167988	0.000412191	3.07837	0.000157952	3.43222	0.00402946	95.7302	2.00213	191.664	0.000104604	96.1874	1.99261	2366.36	46.6795	129.167	1.6104	0.673925	5138.74	3.74691	222.354	188.918	0.407349	0.37899	2.04475	0.849629
	0.30189	0.000221394	0.000179714	0.000424122	3.86071	0.000192654	3.57652	0.0187677	79.4967	2.0863	165.854	0.000127585	80.0915	2.07081	2435.77	46.3017	124.823	1.57381	0.752605	11575.7	4.49258	227.967	150.885	0.491614	0.723255	2.59185	0.661873
	0.334166	0.000213139	0.000185558	0.000450481	2.99873	0.000160848	3.65245	0.0532717	104.584	2.1306	222.826	0.000106522	105.058	2.12098	2372.48	47.1933	158.064	1.6311	0.709362	11651.4	4.2209	241.859	236.774	0.455204	0.642436	2.21639	0.978974
	0.302913	0.000328058	0.000206566	0.000458741	4.67422	0.000162761	3.00885	0.0367469	55.2001	1.75516	96.8849	0.000107789	55.8024	1.73621	2046.16	46.6405	61.8171	1.49325	0.638047	2327.63	2.67101	194.601	70.8544	0.402814	0.345735	1.83589	0.364101
	0.275801	0.000266679	0.000234795	0.000442284	2.5265	0.000170344	3.62388	0.0195673	123.193	2.11393	260.422	0.000112811	123.591	2.10713	2560.26	47.8149	191.983	1.39714	0.737199	11754.8	4.92641	246.33	325.523	0.447505	0.540221	2.33191	1.32149
	0.385133	0.000328401	0.000220302	0.000489871	3.03996	0.000143747	2.92312	0.0441138	82.563	1.70516	140.783	9.51967e-05	82.9476	1.69725	1753.4	47.5622	85.1128	1.49119	0.604569	2839.78	2.76801	196.603	152.891	0.377463	0.298181	1.58503	0.777664
	0.349178	0.00027753	0.00013833	0.000486936	4.51478	0.000176948	4.04383	0.0416739	76.8194	2.3589	181.209	0.000117184	77.6022	2.33511	2567.48	45.1646	135.384	1.88041	0.747113	9942.05	4.29735	245.249	116.827	0.460907	0.59756	2.68438	0.476363
	0.323736	0.000366476	0.000243704	0.000416093	4.34328	0.000142936	3.72885	0.0633048	73.6441	2.17516	160.188	9.46595e-05	74.3394	2.15482	2460.05	48.4866	110.927	1.31958	0.692483	3840.59	3.14218	260.637	97.4351	0.385684	0.337322	2.00098	0.373834
	0.35239	0.000303618	0.000175658	0.000407208	1.73128	0.000171957	2.90763	0.0338515	144.296	1.69612	244.742	0.000113879	144.515	1.69355	1836.98	46.656	158.576	1.53483	0.64793	7634.33	4.51971	188.18	521.877	0.419584	0.384972	1.89195	2.77329
	0.323091	0.000292305	0.000180991	0.000476462	3.57388	0.000155884	4.09742	0.0430731	98.4058	2.39016	235.206	0.000103235	99.0377	2.37491	2705.78	47.0321	173.212	1.62252	0.736428	9579.99	4.28215	269.473	176.545	0.430072	0.508338	2.40515	0.65515
	0.337056	0.000336397	8.29399e-05	0.000460718	1.86107	0.000179235	4.19939	0.0416766	193.858	2.44964	474.883	0.000118699	194.198	2.44535	2715.91	42.6999	345.467	2.71274	0.727479	21048.4	6.95341	227.644	702.034	0.451641	0.522941	2.84745	3.08391
	0.301708	0.000288163	0.000203762	0.000436025	1.81374	0.000152582	3.8683	0.0410159	183.237	2.25651	413.476	0.000101048	183.543	2.25275	2635.17	48.1044	300.093	1.46366	0.72578	15242.3	5.517	266.138	637.462	0.422826	0.478761	2.23311	2.39523
	0.313144	0.000251076	0.000168094	0.000341438	1.32535	0.000174005	3.80363	0.0640024	246.607	2.21879	547.168	0.000115235	246.827	2.21681	2548.69	47.8059	418.079	1.42678	0.764078	31537	7.42612	258.451	1285.16	0.462766	0.616629	2.50601	4.97254
	0.272279	0.000362759	0.000237734	0.000404923	2.87699	0.00014899	3.64839	0.0788289	108.896	2.12823	231.755	9.86688e-05	109.351	2.11938	2590.11	48.4986	162.537	1.32107	0.701332	5676.74	3.96465	255.139	222.367	0.393882	0.34937	2.05143	0.871553
	0.356328	0.000251058	0.000148031	0.000463125	7.14198	0.000138096	3.24575	0.0342119	38.8554	1.89335	73.567	9.14542e-05	39.8259	1.84722	2038.13	46.0247	44.0083	1.77034	0.598207	1748	1.91214	204.415	31.8868	0.394673	0.407816	1.65726	0.15599
	0.33774	0.000291029	0.00011533	0.000484446	4.89166	0.000166688	3.44056	0.0552564	60.3017	2.00699	121.025	0.000110389	61.0213	1.98333	2222.84	44.3386	79.3995	2.09402	0.656058	4036.21	3.10016	201.099	78.6909	0.428657	0.455933	2.14778	0.391304
	0.345519	0.000400831	0.000171251	0.000499255	1.57227	0.000151851	3.82996	0.0854718	209.302	2.23414	467.61	0.000100564	209.564	2.23135	2445.36	46.1494	323.262	1.79308	0.691307	11858	5.69859	242.518	783.096	0.394166	0.339284	2.20129	3.22902
	0.36411	0.000288971	0.000242094	0.000471828	2.37812	0.000170905	3.64779	0.0554054	131.753	2.12788	280.355	0.000113182	132.13	2.12181	2262.89	47.6257	206.915	1.41321	0.738047	13448.1	5.13123	245.998	365.143	0.441762	0.50367	2.35588	1.48434
	0.332107	0.000304067	0.000275498	0.000407631	1.23629	0.000168574	3.73699	0.0336965	259.745	2.17991	566.222	0.000111638	259.947	2.17822	2434.9	48.8906	431.688	1.22215	0.762401	26082.7	7.31047	265.578	1369.9	0.43685	0.484687	2.38552	5.1582
	0.354555	0.000206996	0.000208257	0.000407371	3.75627	0.000147401	3.77874	0.0180161	86.3337	2.20426	190.302	9.76168e-05	86.9455	2.18875	2379.35	48.361	134.524	1.48098	0.706896	9330.25	3.56839	262.757	151.004	0.440747	0.625568	2.096	0.574689
	0.254903	0.000217891	0.00017036	0.000480101	2.56842	0.000133455	3.8371	0.0322848	128.31	2.23831	287.197	8.8381e-05	128.737	2.23088	2789.13	47.7783	192.676	1.7412	0.670884	9111.61	3.86652	260.424	310.881	0.417151	0.548417	1.93421	1.19375
	0.328035	0.000312727	0.000149641	0.000475496	4.36145	0.000142166	3.78666	0.0649112	74.4729	2.20888	164.502	9.41497e-05	75.1819	2.18805	2482.3	46.3653	109.472	1.80517	0.665474	4293.45	3.10469	242.024	101.316	0.398249	0.399234	2.02091	0.41862
	0.320027	0.000270135	0.000173717	0.000519329	5.13245	0.0001524	3.73835	0.0446029	62.4317	2.1807	136.145	0.000100927	63.2505	2.15248	2479.84	46.2956	92.8997	1.73876	0.682358	4688.32	3.06593	238.219	76.5584	0.422745	0.487395	2.13115	0.321378
	0.306584	0.000385889	0.000130372	0.000409324	3.29876	0.000170242	3.54041	0.0525074	92.1374	2.06524	190.286	0.000112743	92.6422	2.05399	2394.97	44.491	128.831	2.01032	0.677041	5146.13	4.03318	208.36	172.053	0.413105	0.363697	2.27172	0.825747
	0.325055	0.000303703	0.000193164	0.000468528	3.74587	0.000137193	3.9366	0.0781434	90.1909	2.29635	207.11	9.08562e-05	90.8265	2.28028	2592.04	47.8804	142.735	1.55749	0.689174	5765.79	3.42112	268.321	142.514	0.397073	0.413437	2.03241	0.531134
	0.293911	0.00037928	0.000251375	0.000518571	3.74753	0.000187732	4.22187	0.0125646	96.6839	2.46276	238.109	0.000124326	97.3659	2.44551	2908.15	46.627	193.588	1.43804	0.813022	11705.1	5.4519	272.896	173.274	0.450554	0.485832	2.98263	0.634946
	0.291947	0.000312209	0.00010464	0.00043378	4.90904	0.000146241	3.72125	0.00522909	64.9893	2.17073	141.074	9.68483e-05	65.7702	2.14496	2570.44	44.6849	90.8582	2.18652	0.644045	3378.09	2.90953	220.917	79.2798	0.402147	0.403257	2.03789	0.358867
	0.361997	0.000261344	0.000166217	0.000417942	3.80872	0.000195406	3.60786	0.0690695	81.2914	2.10459	171.085	0.000129408	81.8835	2.08937	2245.56	45.9718	129.327	1.58576	0.755926	11459.7	4.63825	226.7	152.658	0.479839	0.627015	2.65243	0.673392
	0.301603	0.000321436	0.000185901	0.000462394	5.43335	0.000166125	3.3169	0.0773549	52.3087	1.93486	101.21	0.000110016	53.0758	1.9069	2259.89	46.0786	67.5482	1.5838	0.667407	2917.93	2.84978	209.386	59.5907	0.41589	0.395553	2.05804	0.284597
	0.352683	0.000276993	0.000137212	0.000398665	1.4609	0.000199965	3.86227	0.0571025	227.165	2.25299	511.8	0.000132427	227.41	2.25056	2439	45.5232	402.223	1.72899	0.785898	37250.1	8.37062	237.972	1132.23	0.487879	0.652098	2.92372	4.75782
	0.328573	0.000271339	0.000146386	0.000507964	2.4195	0.000185454	3.9115	0.0142961	138.858	2.28171	316.834	0.000122817	139.269	2.27498	2562.09	45.3168	239.999	1.86282	0.757491	18897.9	5.99671	238.825	404.598	0.47254	0.62408	2.74098	1.69412
	0.333135	0.000351012	0.000166275	0.000397386	2.48085	0.000129126	3.19221	0.0750121	110.518	1.86212	205.798	8.5514e-05	110.862	1.85635	2076.74	47.5953	123.411	1.62157	0.59967	3141.85	2.99407	214.999	238.969	0.359569	0.274089	1.55728	1.11149
	0.316337	0.000210086	0.000102229	0.00042558	2.3108	0.00013672	3.43264	0.0295179	127.598	2.00237	255.498	9.05434e-05	127.942	1.99698	2289.4	46.3814	159.348	2.04039	0.623677	7773.38	3.60229	219.55	342.779	0.416076	0.521614	1.77378	1.56128
	0.376892	0.000345128	0.000164818	0.000367392	3.52746	0.00016184	3.90279	0.0243423	94.9682	2.27663	216.207	0.000107179	95.5625	2.26247	2372.41	46.7556	157.416	1.57925	0.72808	8178.45	4.23819	253.665	168.511	0.419819	0.42582	2.37881	0.664304
	0.346872	0.000314542	0.000160064	0.000415658	3.78669	0.000167288	2.71385	0.0417613	61.5045	1.58308	97.3664	0.000110787	61.9473	1.57176	1729.16	45.8813	58.9497	1.64329	0.605442	2333.06	2.68087	169.854	97.8502	0.404158	0.335514	1.70822	0.576086
	0.309825	0.000286342	0.000201294	0.00030642	2.21088	0.000152573	3.2694	0.0249607	127.028	1.90715	242.262	0.000101042	127.342	1.90245	2201.3	49.0906	164.889	1.24631	0.68062	7342.26	4.08926	234.251	350.778	0.409181	0.40686	1.88575	1.49744
	0.330973	0.000254425	0.000157904	0.000381836	1.75368	0.00014817	3.76633	0.0576461	184.52	2.19702	405.396	9.81255e-05	184.808	2.19361	2458.18	47.9311	285.08	1.55602	0.703215	15662.8	5.22172	257.259	667.211	0.424921	0.512739	2.11159	2.59353
	0.307813	0.000276593	0.00021794	0.000410297	3.55083	0.000157602	3.74148	1e-05	90.4423	2.18253	197.393	0.000104372	91.0156	2.16878	2526.5	48.1869	143.107	1.37626	0.724985	7823.59	3.93516	258.297	163.052	0.429382	0.495992	2.22059	0.631259
	0.326938	0.000191021	0.000191633	0.000484784	0.898192	0.000156132	3.98074	0.0896445	380.867	2.3221	884.411	0.000103398	381.023	2.32115	2613.79	47.2094	646.831	1.76733	0.73137	54510.1	8.28814	263.778	2957.97	0.467335	0.761467	2.35443	11.2139
	0.288079	0.000272517	0.000216114	0.000429116	3.09605	0.000145151	3.6039	0.0925369	99.9438	2.10228	210.109	9.61266e-05	100.427	2.09217	2502.98	48.4417	144.34	1.41781	0.686974	6415.24	3.63986	251.438	197.632	0.410521	0.447263	1.97292	0.786007
	0.322054	0.000216694	0.000245858	0.000446069	5.21255	0.00017236	3.6753	0.0474197	60.4304	2.14392	129.558	0.000114146	61.2473	2.11533	2430.74	47.1717	94.9653	1.46995	0.732994	7672.07	3.50583	243.15	80.7959	0.468152	0.675316	2.36868	0.332289
	0.363806	0.000296133	0.000237182	0.00043413	3.46599	0.0001733	3.43295	0.034341	85.0207	2.00256	170.259	0.000114768	85.5345	1.99053	2130.64	47.5878	122.461	1.35727	0.719267	7458.55	4.00285	231.141	159.694	0.436639	0.46754	2.24108	0.690894
	0.394727	0.000213477	0.000267598	0.000465701	4.83586	0.000121102	3.88332	0.0462132	68.8511	2.26527	155.966	8.01999e-05	69.6543	2.23915	2293.02	49.1495	102.726	1.48963	0.658639	5146.7	2.56189	278.907	84.4547	0.398311	0.509825	1.76167	0.302806
	0.345242	0.000321771	0.00024249	0.000494986	4.02337	0.000146563	4.17974	0.0803196	89.1372	2.43818	217.333	9.70617e-05	89.8608	2.41855	2669.82	48.1218	160.239	1.43263	0.737298	7653.55	3.8724	287.774	135.495	0.410367	0.442152	2.30288	0.47084
	0.300071	0.000322871	0.000210019	0.000443332	2.78614	0.00015034	3.74383	0.0417294	115.394	2.1839	252.009	9.95629e-05	115.846	2.17538	2556.36	47.9134	177.701	1.45522	0.705136	7487.49	4.18302	255.533	251.522	0.407137	0.406555	2.12472	0.984303
	0.314798	0.00030595	0.000183884	0.000502367	4.04983	0.000173619	3.63599	0.0420945	77.0328	2.12099	163.386	0.00011498	77.6662	2.10369	2430.49	46.0269	116.957	1.65291	0.715835	6553.58	3.91906	229.015	124.372	0.438743	0.479147	2.37286	0.543073
	0.340882	0.000243718	0.000191381	0.00055242	3.46228	0.000163481	3.91036	0.0498226	96.9481	2.28104	221.143	0.000108266	97.5327	2.26737	2514.39	46.334	160.538	1.77006	0.725949	11317.8	4.32342	249.594	188.945	0.452574	0.610438	2.40814	0.757008
	0.323	0.000201933	0.000136995	0.000481185	4.3541	0.000125847	4.05843	0.0125114	79.9533	2.36742	189.283	8.33427e-05	80.7119	2.34516	2680.39	47.1929	124.884	1.92846	0.659777	6436.34	2.93542	268.738	113.448	0.414665	0.586611	1.91739	0.422149
	0.299774	0.000300353	9.24299e-05	0.000427302	3.05945	0.000178419	3.28777	0.0313649	92.2698	1.91787	176.961	0.000118158	92.7051	1.90886	2245.91	43.4604	115.502	2.3361	0.652699	5857.5	4.00227	184.632	197.128	0.438276	0.455115	2.21262	1.06768
	0.32477	0.000305943	0.000209833	0.000423917	2.89688	0.000173698	3.87159	0.0830294	114.763	2.25843	259.184	0.000115032	115.249	2.24891	2550.31	47.43	197.723	1.42182	0.762867	12446.1	5.09795	258.949	263.103	0.445272	0.512467	2.53781	1.01604
	0.319086	0.00029874	0.000148493	0.00042571	2.01346	0.000138623	3.84227	0.0371082	163.938	2.24132	367.438	9.18033e-05	164.274	2.23673	2552.3	47.307	249.084	1.71841	0.677893	10082.5	4.56646	255.656	485.38	0.399509	0.416577	2.01438	1.89857
	0.339662	0.00032539	0.000176642	0.000498838	4.31465	0.000151337	4.38423	0.0365333	87.1645	2.55747	222.92	0.000100223	87.9768	2.53385	2824.31	46.6983	165.892	1.68757	0.744178	8411.81	4.06846	284.259	126.364	0.419809	0.473001	2.49126	0.444537
	0.313078	0.000318895	0.000242793	0.000519251	1.48831	0.000143364	3.00854	0.0468318	173.691	1.75498	304.824	9.49427e-05	173.886	1.75301	2016.11	47.9354	188.508	1.47086	0.618415	6024.1	4.10841	205.535	665.418	0.382043	0.316311	1.63273	3.23749
	0.315848	0.000202549	0.000215744	0.000500262	3.07124	9.96414e-05	2.64163	0.0520719	73.851	1.54095	113.801	6.59877e-05	74.2021	1.53366	1763.1	49.0269	56.1276	1.70434	0.493208	1221.14	1.55811	188.781	121.641	0.339198	0.302816	0.992799	0.644346
	0.324498	0.000216615	0.000116597	0.000411439	2.72029	0.000129528	4.33439	0.0814679	136.836	2.52839	345.974	8.57798e-05	137.347	2.51898	2856.32	47.5125	241.633	1.87861	0.698414	13405	4.20254	290.912	316.278	0.421516	0.604556	2.11972	1.0872
	0.375039	0.000297403	0.00019013	0.000477518	4.13611	0.000150337	3.61782	0.0605056	75.0436	2.11039	158.371	9.95607e-05	75.6869	2.09245	2205.73	47.1022	107.669	1.58492	0.67985	5191.56	3.25597	238.642	110.881	0.410104	0.424535	2.04368	0.464635
	0.32076	0.000226004	0.000208401	0.000432588	1.73782	0.000181379	3.72932	0.0276067	184.376	2.17544	401.098	0.000120118	184.658	2.17211	2471.18	47.2945	306.413	1.49927	0.763935	27331.1	6.62691	248.009	760.715	0.480462	0.699668	2.55953	3.06728
	0.36254	0.00025514	0.00023951	0.000485137	2.38268	0.000153844	3.33362	0.0258084	120.175	1.94461	233.694	0.000101883	120.52	1.93905	2073.1	47.8606	157.207	1.48336	0.672703	8590.31	4.02611	227.034	317.568	0.422027	0.469277	1.93803	1.39877
	0.341114	0.000288968	0.000172347	0.000381667	3.45378	0.00015997	3.59594	0.0650368	89.3728	2.09763	187.471	0.00010594	89.9091	2.08512	2311.39	47.3548	131.945	1.49873	0.703817	7063.08	3.83536	239.749	164.169	0.425508	0.463295	2.16701	0.684751
	0.29736	0.00032784	0.000185661	0.000523936	2.86285	0.000173846	3.9094	0.0384073	117.264	2.28048	267.418	0.00011513	117.749	2.27109	2679.75	46.0884	199.294	1.68197	0.745252	11059.9	5.1225	246.895	268.95	0.440221	0.483366	2.56502	1.08933
	0.310179	0.000355385	0.000237408	0.000414011	2.63983	0.000167576	3.67109	0.0638563	119.433	2.14147	255.762	0.000110978	119.853	2.13396	2470.49	47.88	188.452	1.33095	0.736826	8918.54	4.80158	250.22	283.529	0.420105	0.403867	2.32322	1.13312
	0.343155	0.000282258	0.000118838	0.000391741	4.34503	0.000164296	3.51888	0.0506311	69.4692	2.05268	142.598	0.000108805	70.1256	2.03347	2254.86	45.3637	96.2198	1.88152	0.674763	5194.63	3.36379	215.297	102.584	0.430643	0.475067	2.17047	0.476477
	0.319002	0.000378139	0.000188679	0.00039606	2.99434	0.000155181	4.13632	0.0698814	118.613	2.41285	286.195	0.000102769	119.149	2.40199	2747.97	47.2738	212.569	1.52576	0.742742	9118.06	4.72238	274.836	241.469	0.408722	0.395638	2.42161	0.878594
	0.370443	0.000340268	0.000109421	0.000450559	1.56421	0.000134128	3.17541	0.0528429	174.426	1.85232	323.093	8.88268e-05	174.642	1.85003	1950.23	45.194	187.185	2.21692	0.579351	5326.78	3.83025	192.832	613.606	0.368708	0.292696	1.6121	3.18208
	0.33798	0.000298044	0.000257875	0.000456139	0.1	0.000136942	3.72816	0.0681544	3204.11	2.17476	6968.17	9.06901e-05	3204.13	2.17475	2407.78	49.3468	4829.06	1.3431	0.693017	199865	19.8627	269.917	189064	0.395281	0.401055	1.93481	700.453
	0.3177	0.000229419	0.000145654	0.000442886	1.15029	0.000172452	3.38532	0.0513118	252.899	1.97477	499.417	0.000114207	253.069	1.97344	2253.34	46.2736	346.941	1.75278	0.694691	24408.6	6.70451	215.518	1504.03	0.45833	0.595392	2.21098	6.97866
	0.293224	0.000266895	0.000168707	0.000442544	2.84957	0.000159746	3.37209	0.0589841	101.619	1.96705	199.89	0.000105792	102.035	1.95903	2325.05	46.8858	134.921	1.62006	0.674977	6775.05	3.87295	220.394	227.075	0.426909	0.470619	2.03312	1.03031
	0.352489	0.000284027	0.000188746	0.00046203	1.13918	0.000128118	3.76219	0.0813097	283.794	2.19461	622.818	8.48467e-05	283.981	2.19317	2376.51	48.5528	412.505	1.56576	0.66232	15897.7	5.43122	263.686	1437.55	0.386611	0.397066	1.82548	5.45176
	0.360111	0.000286245	0.000194659	0.000379171	3.4128	0.000142609	4.35878	0.0316875	109.636	2.54262	278.764	9.44432e-05	110.279	2.52781	2720.96	48.7973	210.179	1.39756	0.753968	11612.7	4.31533	308.584	200.38	0.418337	0.505468	2.34198	0.649351
	0.330352	0.000321236	0.000260973	0.000541736	3.25019	0.000183306	3.60572	0.0466683	95.2426	2.10333	200.327	0.000121395	95.7492	2.0922	2355.54	46.7383	149.216	1.45867	0.74486	9199.36	4.67364	234.183	195.038	0.446339	0.479177	2.49157	0.832845
	0.284521	0.000234875	0.000282032	0.000420645	3.18736	0.00016139	3.84087	0.0568843	103.458	2.24051	231.799	0.00010688	103.988	2.2291	2680.89	48.759	174.453	1.31186	0.752607	11864.6	4.44925	271.492	218.588	0.451589	0.614762	2.33721	0.805136
	0.34466	0.000326246	0.000194187	0.000438367	2.82064	0.000144711	3.43282	0.0774062	104.512	2.00248	209.283	9.58354e-05	104.932	1.99447	2194.67	47.684	137.97	1.51187	0.659249	5194.29	3.54786	232.067	216.502	0.39174	0.355079	1.87509	0.932928
	0.31092	0.00024257	0.000206141	0.000435687	1.8002	0.000166357	3.32895	0.0138238	158.875	1.94189	308.518	0.00011017	159.136	1.9387	2237.84	47.5576	214.431	1.48642	0.695035	13260.7	5.08458	223.854	584.04	0.443459	0.533645	2.09529	2.60903
	0.324934	0.000273307	0.000131187	0.000409978	1.79291	0.000135756	4.39061	0.0585155	210.397	2.56119	538.866	8.99049e-05	210.739	2.55703	2891.5	47.4257	387.484	1.7917	0.719073	19015.5	5.57774	293.609	723.994	0.413426	0.509782	2.25521	2.46584
	0.35969	0.000285769	0.000259039	0.000411917	3.03325	0.00011682	3.62603	0.0367686	102.643	2.11518	217.11	7.73644e-05	103.119	2.10542	2265.03	50.4467	139.782	1.27231	0.643832	4472.32	2.88281	274.356	184.352	0.365286	0.345446	1.5979	0.671942
	0.307601	0.000277023	0.000133666	0.000457423	3.44343	0.000164327	3.66097	0.0563399	91.2631	2.13557	194.898	0.000108826	91.8075	2.1229	2472.89	45.6784	135.316	1.86186	0.694291	7451.45	3.98984	227.109	172.485	0.43649	0.505431	2.26637	0.759482
	0.327248	0.000250342	0.00025781	0.000421331	3.17345	0.000174641	3.71843	0.0656666	100.6	2.16908	218.21	0.000115656	101.11	2.15813	2440.43	48.1112	165.861	1.32703	0.760099	12591.1	4.6945	255.9	217.848	0.460824	0.604268	2.44859	0.851303
	0.346512	0.000292899	0.000198615	0.000505056	3.11464	0.000140166	4.36085	0.0303451	120.212	2.54383	305.799	9.28251e-05	120.8	2.53145	2780.1	47.8596	224.348	1.59952	0.733646	11265.8	4.38203	296.979	237.76	0.413074	0.486221	2.30518	0.800594
	0.340832	0.000285571	0.000106238	0.000376777	2.72827	0.000154044	4.36601	0.0408582	137.431	2.54684	350.014	0.000102016	137.947	2.53731	2807.59	45.7649	257.715	2.00371	0.736299	15250.6	5.16163	271.875	327.299	0.43559	0.549344	2.53929	1.20386
	0.289306	0.000264962	0.000269304	0.000407071	4.9267	0.000149076	4.08724	0.0493636	71.1239	2.38422	169.575	9.87262e-05	71.9846	2.35572	2833.77	49.076	126.914	1.26011	0.748422	6942.51	3.50538	292.675	91.9014	0.427501	0.531971	2.28152	0.314005
	0.352479	0.000183151	0.000133721	0.000435502	1.44571	0.00016021	3.75272	0.0696932	223.042	2.18908	488.258	0.0001061	223.278	2.18677	2370.56	46.5802	346.425	1.87374	0.709512	30956.9	6.22395	242.084	1086	0.471648	0.767754	2.27607	4.48604
	0.372256	0.000315423	0.000211262	0.000402759	4.67519	0.000143784	3.64226	0.0584599	66.8068	2.12465	141.941	9.52212e-05	67.5361	2.10171	2230.52	48.1843	96.7536	1.38496	0.681646	4106.42	2.95199	251.42	84.3806	0.39645	0.384529	1.96325	0.335616
	0.341992	0.000301417	0.000261697	0.00045484	3.49767	0.000183966	3.69879	0.094256	90.7724	2.15762	195.853	0.000121832	91.3309	2.14443	2374.34	47.4974	150.361	1.33039	0.767725	10539.4	4.70843	248.094	176.052	0.454999	0.525315	2.56296	0.70962
	0.352966	0.000355554	0.000281657	0.00037922	4.39834	0.000171565	3.96652	0.039959	77.3535	2.3138	178.981	0.000113619	78.1022	2.29162	2503.74	48.5924	140.337	1.16446	0.78409	8035.49	4.24215	278.461	112.759	0.430347	0.443818	2.55425	0.404938
	0.311887	0.000227844	0.000159798	0.000435439	0.617236	0.000148825	3.60853	0.0274756	502.43	2.10498	1057.6	9.85598e-05	502.527	2.10457	2422.38	47.5334	724.024	1.66848	0.68459	41512.1	8.35843	242.407	5248.5	0.431947	0.551749	2.03485	21.6516
	0.342048	0.000215535	0.00020321	0.000473031	4.03547	0.000111179	3.77128	0.0301046	80.1844	2.19992	176.399	7.36282e-05	80.8392	2.1821	2420.67	49.038	109.645	1.62767	0.621572	4116.05	2.42989	269.632	112.333	0.379345	0.45177	1.57611	0.416617
	0.272163	0.000219613	0.00017109	0.000552348	4.48227	0.000171255	3.46335	0.0543586	66.2713	2.02029	133.887	0.000113414	66.9371	2.00019	2459.14	45.367	91.4846	1.89935	0.683297	6119.3	3.41892	211.931	101.473	0.460696	0.626032	2.2254	0.478803
	0.332214	0.000206815	0.000146242	0.000383158	1.35931	0.000165439	3.61617	0.0809577	228.592	2.10943	482.2	0.000109562	228.806	2.10746	2355.8	47.2364	346.109	1.63343	0.717772	27681.2	6.42415	239.894	1165.47	0.464349	0.676633	2.26511	4.85829
	0.326901	0.000332123	0.000119173	0.00040867	4.13042	0.000137478	3.61028	0.0548909	74.9906	2.10599	157.93	9.10448e-05	75.6318	2.08814	2370.67	45.6495	99.405	2.00869	0.629425	3223.15	2.86093	223.682	103.745	0.383452	0.346922	1.86502	0.463807
	0.306147	0.000218226	0.000218735	0.00056828	1.25619	0.00015631	3.7899	0.0309063	259.249	2.21077	573.141	0.000103516	259.457	2.209	2565.35	46.7942	405.561	1.80088	0.707611	27427.3	6.5703	246.734	1388.51	0.450774	0.635062	2.24323	5.62758
	0.312644	0.000287298	0.000279583	0.000443637	1.80871	0.000154774	3.71879	0.0659015	176.645	2.16929	383.195	0.000102499	176.938	2.1657	2493.65	48.9858	279.673	1.28588	0.729844	14580.3	5.40248	265.314	616.148	0.422764	0.468276	2.17765	2.32234
	0.350653	0.000293829	0.000215129	0.000397664	7.02001	0.000118667	4.3609	0.0606734	53.1216	2.54386	135.134	7.85876e-05	54.4048	2.48386	2762.51	49.0707	92.6459	1.35961	0.685587	3302.07	2.38405	312.204	42.2887	0.376248	0.402625	1.91491	0.135452
	0.319977	0.000285762	9.47413e-05	0.00047781	0.666848	0.000169345	2.8127	0.071065	362.486	1.64074	594.747	0.000112149	362.568	1.64037	1865.95	43.7564	352.975	2.34415	0.593487	15168.2	6.64073	160.113	3399.37	0.418945	0.390166	1.80471	21.2311
	0.340129	0.000186326	0.000126833	0.00054575	2.21507	0.000190256	3.76194	0.0741009	145.889	2.19447	320.149	0.000125997	146.251	2.18904	2421.72	44.4539	236.357	2.19904	0.738273	27408.5	6.10511	221.029	503.233	0.512099	0.897131	2.70572	2.27677
	0.357228	0.000285753	0.000242197	0.000571503	4.30823	0.000157016	3.77156	0.0295322	75.096	2.20008	165.217	0.000103984	75.7938	2.17982	2365	46.9276	116.729	1.58991	0.706518	6443.79	3.54083	246.943	110.602	0.425859	0.480745	2.22361	0.447883
	0.296623	0.000157993	0.000177197	0.000454383	3.97032	0.00011181	3.61084	0.0434476	78.0371	2.10632	164.371	7.40461e-05	78.6542	2.0898	2477.7	48.2556	98.6684	1.8838	0.600277	4506.42	2.31814	249.99	117.57	0.401346	0.59359	1.51802	0.470299
	0.320352	0.000303679	0.000156215	0.000526684	2.11285	0.000174993	3.1459	0.021966	127.907	1.83511	234.722	0.000115889	128.196	1.83097	2085.84	45.3011	154.89	1.83916	0.659888	7717.25	4.54572	191.946	388.246	0.429815	0.423473	2.08158	2.02268
	0.330526	0.000228431	0.000275678	0.000479199	1.09683	0.00016233	4.30532	0.0339661	337.307	2.51144	847.124	0.000107503	337.512	2.5099	2811.84	48.3012	672.116	1.4632	0.793409	56936.5	8.78399	298.634	2143.58	0.466995	0.715879	2.64696	7.17796
	0.341745	0.000237911	0.000191012	0.00040517	3.4909	0.000154534	3.26361	0.0525579	80.2484	1.90377	152.775	0.00010234	80.7403	1.89218	2095.77	47.7917	101.603	1.47428	0.665053	5650.59	3.25123	221.626	146.149	0.426419	0.493298	1.89966	0.659438
	0.355557	0.000291692	0.000237514	0.000477836	1.48634	0.000188063	3.23208	0.0319911	186.844	1.88538	352.272	0.000124545	187.053	1.88327	2031.97	46.9217	253.146	1.43313	0.718611	17059.2	6.24541	211.566	847.766	0.451873	0.487339	2.30096	4.00709
	0.383484	0.000205049	0.000204989	0.000387202	5.8855	0.00013712	3.49394	0.0847492	50.841	2.03813	103.621	9.08082e-05	51.7127	2.00377	2101.41	48.3536	67.5868	1.44432	0.652253	3885.49	2.3529	242.88	53.6097	0.417202	0.537813	1.78502	0.220725
	0.304585	0.000310959	0.000242256	0.000433389	2.11591	0.000118916	4.04618	0.01146	164.272	2.36027	387.727	7.87525e-05	164.644	2.35494	2744.99	50.0959	264.515	1.33866	0.68222	8261.77	4.0368	301.903	429.595	0.370846	0.361457	1.81934	1.42296
	0.3371	0.000313619	0.000192974	0.000330126	2.46577	0.000165019	3.90501	0.0485021	136.024	2.27792	309.851	0.000109284	136.441	2.27094	2525.35	48.1985	235.271	1.33891	0.759303	13645.2	5.28309	269.716	356.229	0.432852	0.479597	2.43462	1.32076
	0.305025	0.000389006	0.000149221	0.000510286	3.16867	0.000148563	3.80708	0.0710085	103.154	2.2208	229.084	9.83863e-05	103.676	2.20962	2581.15	45.462	153.557	1.95934	0.670308	5084.27	3.84253	233.941	189.822	0.391005	0.338697	2.13266	0.811409
	0.33567	0.000376859	3.78868e-05	0.000508651	1.42549	0.000147715	3.60367	0.0595264	217.222	2.10214	456.632	9.78246e-05	217.446	2.09998	2335.5	38.513	252.061	5.64835	0.552	7202.03	4.89495	158.92	884.393	0.388864	0.330369	2.01526	5.56503
	0.336098	0.000278182	0.000214991	0.000405898	1.86535	0.000189636	4.10294	0.0673	188.972	2.39338	452.281	0.000125587	189.304	2.38917	2657.36	47.5441	372.478	1.37652	0.823554	33371.6	7.63909	275.744	726.119	0.480316	0.6537	2.94347	2.63331
	0.352244	0.00025416	0.000174359	0.000464201	3.24924	0.000140926	3.38949	0.0509568	89.5572	1.9772	177.073	9.33285e-05	90.0333	1.96674	2141.89	47.457	113.85	1.64205	0.642956	5174.06	3.13855	226.962	166.493	0.405084	0.437696	1.80066	0.733573
	0.29781	0.000269645	0.00023857	0.000455007	3.09003	0.0001544	3.25076	0.0314707	90.3266	1.89628	171.284	0.000102251	90.7613	1.8872	2226.86	48.0307	114.283	1.40884	0.667209	5267.01	3.44514	222.967	181.194	0.415637	0.433721	1.89302	0.812649
	0.345404	0.000167371	0.000215804	0.000510329	0.636044	0.000171331	3.16345	0.0456925	427.434	1.84534	788.763	0.000113464	427.522	1.84496	2020.16	46.0151	525.134	1.91233	0.665769	48459	8.19486	199.15	4816.44	0.480136	0.758023	2.0536	24.185
	0.322653	0.000315436	0.000179042	0.000409168	4.17509	0.000166456	3.84375	0.0450963	78.983	2.24219	177.095	0.000110236	79.6728	2.22277	2539.91	46.8327	129.827	1.52948	0.733092	7050.12	3.9587	250.652	121.681	0.431644	0.470785	2.40374	0.485456
	0.392186	0.00032212	0.000213655	0.000343756	1.37112	0.000154232	3.54097	0.0345938	221.91	2.06557	458.371	0.00010214	222.122	2.0636	2099.64	48.7992	324.744	1.28741	0.708474	16106.9	5.80117	250.707	986.99	0.408598	0.39657	2.06772	3.93683
	0.349438	0.000213334	8.09217e-05	0.000393224	4.7102	0.000163203	3.51672	1e-05	64.0224	2.05142	131.337	0.000108082	64.7316	2.02894	2231.92	44.43	86.4118	2.23977	0.657941	5999.72	3.16655	206.399	91.8107	0.453506	0.622984	2.15125	0.444822
	0.297106	0.000337174	0.00013948	0.000467812	4.48851	0.00017015	3.90327	0.0776507	74.5848	2.27691	169.823	0.000112682	75.3362	2.2542	2676.52	44.9817	121.746	1.9024	0.716901	6058.13	3.9186	234.811	106.858	0.431668	0.456573	2.49182	0.45508
	0.332927	0.000197428	0.000227733	0.000405254	2.39971	0.000156626	4.01889	0.0513438	143.849	2.34435	337.232	0.000103726	144.268	2.33755	2615.36	48.5058	254.71	1.4598	0.755297	21765.7	5.21746	281.132	416.128	0.465303	0.744312	2.37858	1.48019
	0.328898	0.000324063	0.000191763	0.000434027	1.82486	0.000167105	3.4428	0.0842834	162.088	2.0083	325.521	0.000110665	162.361	2.00492	2253.99	47.0379	228.077	1.51462	0.700652	11187.7	5.26746	226.478	559.697	0.422261	0.41495	2.1766	2.47131
	0.340885	0.000302837	0.00020339	0.000373415	4.26395	0.000113578	3.5302	0.0427284	71.0229	2.05929	146.256	7.5217e-05	71.6696	2.04071	2269.93	49.7102	90.0759	1.361	0.615876	2374.66	2.24993	259.363	87.6947	0.353339	0.307188	1.50579	0.338116
	0.309657	0.000294601	0.000146109	0.000509493	5.069	0.000178833	3.45137	0.0356372	58.3643	2.0133	117.505	0.000118432	59.1112	1.98786	2324.39	44.737	80.6585	1.87287	0.686428	4519.21	3.35231	205.373	75.9446	0.443006	0.484325	2.30954	0.369789
	0.292638	0.000395255	0.00021957	0.000505566	2.89734	0.000151537	3.1017	0.0560121	91.9272	1.80932	166.326	0.000100356	92.3164	1.80169	2140.39	46.8904	104.871	1.53961	0.630515	2940.3	3.23905	202.762	178.876	0.377991	0.277243	1.77375	0.882201
	0.343045	0.000302043	0.000194228	0.000430812	1.58549	0.000141693	4.22295	0.0471503	228.852	2.46339	563.752	9.38368e-05	229.144	2.46025	2706.47	48.4368	414.897	1.49071	0.735956	20273.3	6.02408	294.567	885.079	0.410869	0.463234	2.26476	3.00468
	0.334878	0.000255725	0.000161347	0.000453713	3.4352	0.000152795	3.83188	0.0615869	95.7529	2.23526	214.033	0.000101189	96.3214	2.22207	2486.36	46.9902	150.811	1.67958	0.704615	8718.8	3.91648	251.561	179.378	0.431611	0.532883	2.20576	0.713059
	0.327664	0.000228577	8.03278e-05	0.000394413	2.06194	0.000173198	3.52891	0.0604855	147.024	2.05853	302.654	0.000114701	147.341	2.05411	2314.61	44.3128	205.859	2.28553	0.68018	14809.6	5.18679	206.023	492.77	0.46315	0.624702	2.31131	2.39181
	0.298884	0.000231603	0.000232718	0.000520886	3.23574	0.000146501	3.92573	0.0477511	104.159	2.29001	238.526	9.70207e-05	104.709	2.278	2685.11	47.6777	169.067	1.62213	0.7088	9796.72	3.97596	265.319	208.003	0.433321	0.578349	2.16814	0.783972
	0.301303	0.000217411	0.000155402	0.000468238	2.99811	0.000119168	3.10851	0.0616564	89.0271	1.8133	161.433	7.89191e-05	89.4305	1.80512	2118.82	47.8798	92.2547	1.77636	0.571474	3011.06	2.38905	211.873	167.349	0.377874	0.397121	1.39752	0.789853
	0.298083	0.000335494	0.00022871	0.00045044	4.26126	0.000136668	4.07018	0.0734978	81.9384	2.37427	194.544	9.05085e-05	82.6835	2.35288	2787.09	48.5064	137.709	1.40476	0.707853	5012.77	3.34748	284.727	111.942	0.390705	0.384698	2.08909	0.393155
	0.295153	0.000284744	0.00018872	0.000424444	2.22535	0.000163279	2.99221	0.0371347	115.502	1.74545	201.603	0.000108132	115.791	1.74109	2057.49	47.1796	130.509	1.49971	0.647355	5764.09	3.89334	198.024	322.4	0.416318	0.400717	1.84691	1.62809
	0.346548	0.000388867	9.79148e-05	0.00043804	1.80545	0.000130855	3.82793	0.0448447	182.158	2.23296	406.752	8.6659e-05	182.459	2.22928	2440.22	44.3642	250.814	2.54897	0.616627	6771.56	4.32552	224	554.092	0.368015	0.301088	1.89517	2.47363
	0.353912	0.000288496	0.000202712	0.00036285	5.07099	0.000168341	3.66896	0.0541409	62.0195	2.14023	132.736	0.000111484	62.8138	2.11316	2312.53	47.6365	97.0511	1.34045	0.731161	5950.9	3.46148	247.537	79.5617	0.436926	0.494906	2.31108	0.321413
	0.29646	0.000298839	0.00022439	0.000489673	3.78276	0.000173494	3.5742	0.056919	81.0873	2.08495	169.063	0.000114897	81.67	2.07008	2453.13	46.8865	122.248	1.48519	0.723093	6843.8	4.00384	233.61	140.392	0.439371	0.482361	2.33326	0.600964
	0.336512	0.000297274	0.000128596	0.000434175	1.45484	0.000202609	3.9925	0.0583496	235.804	2.32896	549.179	0.000134178	236.057	2.32646	2584.23	44.778	434.479	1.8861	0.791143	38184	8.81486	238.009	1179.1	0.487428	0.636412	3.0623	4.95404
	0.334098	0.000248937	0.000173064	0.000402768	0.1	0.000151967	3.56286	0.0895584	3062.05	2.07834	6363.98	0.00010064	3062.07	2.07833	2314.52	47.9647	4414.62	1.52818	0.693688	248778	21.075	243.702	195533	0.427771	0.509228	2.05189	802.344
	0.294905	0.000236516	0.000143054	0.0004699	3.19802	0.00014169	3.36644	0.103473	90.376	1.96376	177.477	9.38342e-05	90.8416	1.95369	2315.64	46.7473	112.333	1.82004	0.632945	4985.93	3.13446	218.727	173.432	0.411539	0.469758	1.7984	0.792915
	0.302013	0.000281395	0.000232451	0.000494472	2.06479	0.000172836	3.706	0.0560103	154.19	2.16183	333.333	0.000114461	154.522	2.15718	2523.51	47.2871	247.68	1.48389	0.743043	15558.8	5.67741	246.382	499.403	0.44819	0.531793	2.42221	2.02695
	0.301891	0.000305781	0.000147724	0.000506704	2.34565	0.000173484	3.42405	0.0546981	125.386	1.99736	250.441	0.00011489	125.735	1.99182	2331.93	45.327	171.723	1.86351	0.685683	8845.11	4.7451	209.157	346.567	0.434558	0.453564	2.24493	1.65697
	0.341277	0.00032962	0.00020674	0.000481643	4.44135	0.000157148	3.8833	0.0780286	74.9944	2.26526	169.882	0.000104071	75.7343	2.24313	2495.49	47.0416	122.102	1.52779	0.718745	5888.17	3.62443	255.495	104.736	0.416346	0.429227	2.2901	0.409932
	0.298207	0.000266512	0.000102129	0.000415644	5.50584	0.000146247	3.92601	0.0276556	61.0946	2.29017	139.917	9.68525e-05	62.014	2.25622	2687.9	45.1667	93.4191	2.08456	0.667675	4351.98	2.95037	238.126	69.1799	0.418931	0.496926	2.14369	0.290518
	0.305856	0.000387245	0.000237571	0.000473239	3.63842	0.000139385	2.72966	0.0660329	64.3909	1.5923	102.53	9.23077e-05	64.8193	1.58178	1848.46	47.6477	59.0313	1.42604	0.575749	1296.2	2.23526	184.251	93.5	0.354395	0.228514	1.43236	0.50746
	0.347549	0.00024248	0.000297771	0.000454819	3.0945	0.000168772	3.59381	0.0527965	99.7142	2.09639	209.04	0.00011177	100.195	2.08632	2287.47	48.1996	153.86	1.34501	0.73603	11249.2	4.36952	248.233	217.63	0.452873	0.582833	2.28757	0.876714
	0.303094	0.000244788	0.000169425	0.000517236	3.72497	0.000139172	4.14185	0.0055741	95.4273	2.41608	230.56	9.2167e-05	96.0925	2.39935	2815.92	47.1615	161.699	1.77891	0.70133	8371.43	3.69383	273.897	161.094	0.421836	0.547515	2.1694	0.588155
	0.323125	0.000345186	0.00015564	0.00045406	0.507884	0.000173524	3.69907	0.0513742	625.937	2.15779	1350.64	0.000114917	626.019	2.15751	2442.6	45.7823	973.655	1.76662	0.720884	50285.8	11.3015	230.518	7936.11	0.431375	0.43531	2.43223	34.4272
	0.378196	0.000325293	0.000172566	0.000395723	0.543516	0.000158995	3.44284	0.0339409	544.384	2.00832	1093.3	0.000105295	544.466	2.00802	2088.44	47.1896	750.193	1.55077	0.686174	36045.4	9.08953	227.944	6158.3	0.411892	0.393927	2.07417	27.0167
	0.328554	0.000330726	0.000169711	0.000442921	5.16939	0.000102009	3.70299	0.0325389	61.3968	2.16008	132.622	6.75557e-05	62.2134	2.13172	2425.58	48.5407	77.2533	1.644	0.582508	1500.04	1.87141	259.407	58.6119	0.331484	0.263901	1.41274	0.225946
	0.291276	0.000226985	0.00014425	0.000524051	5.00406	0.000154076	3.06043	0.0386116	52.4286	1.78525	93.5982	0.000102037	53.0827	1.76325	2115.98	45.424	57.0282	1.94115	0.609287	2701.4	2.42858	187.747	65.9879	0.422988	0.480387	1.76499	0.351473
	0.332553	0.000166434	0.00013776	0.000353307	0.884752	0.0001745	3.41634	0.0659905	331.832	1.99286	661.296	0.000115563	331.964	1.99207	2224.48	47.0549	472.13	1.66547	0.713948	49206	7.91403	224.899	2757.59	0.492573	0.838295	2.25836	12.2615
	0.378643	0.000318149	0.000153787	0.000446607	3.82505	0.000166694	3.91938	0.055785	87.9321	2.2863	201.039	0.000110394	88.578	2.26963	2375.8	45.9612	146.259	1.73627	0.727514	8638.71	4.20778	246.16	148.438	0.433196	0.477293	2.45792	0.603015
	0.331333	0.000295675	0.000155508	0.000421759	3.70168	0.000176691	3.21913	0.0258387	74.6361	1.87783	140.154	0.000117014	75.1499	1.86499	2099.91	45.8345	94.8973	1.66389	0.677095	5162.21	3.59263	201.068	130.81	0.435209	0.447317	2.14083	0.650577
	0.338608	0.000233237	0.000270171	0.000464049	3.82937	0.00015366	2.95982	0.0378862	66.3292	1.72656	114.522	0.000101761	66.8175	1.71394	1909.75	47.9069	72.4562	1.42645	0.632686	3668.05	2.73004	201.967	108.02	0.418385	0.453209	1.71099	0.534839
	0.335298	0.000380719	0.000158521	0.000451439	1.11631	0.00015923	3.74644	0.042527	288.399	2.18542	630.273	0.00010545	288.581	2.18404	2429.39	45.9722	439.722	1.79373	0.697669	17937.7	6.96923	235.411	1566.12	0.406138	0.366624	2.25932	6.65269
	0.32794	0.000240015	0.000116099	0.000369028	3.41741	0.000188466	3.8933	0.0812084	97.7956	2.27109	222.103	0.000124812	98.3703	2.25783	2552.57	45.4953	169.626	1.80243	0.763729	15477.8	5.1233	239.59	207.806	0.487029	0.711578	2.76449	0.867341
	0.349624	0.000214088	0.000190524	0.000584224	4.56399	0.000132451	3.45433	0.0269801	64.9103	2.01503	130.796	8.77157e-05	65.5861	1.99427	2191.7	46.5917	80.5998	1.92629	0.616224	3789.38	2.48195	222.946	86.2135	0.406938	0.495205	1.71605	0.386701
	0.320211	0.000259675	0.00026489	0.000485906	3.10027	0.000135053	3.34246	0.0290227	92.5672	1.94977	180.485	8.94393e-05	93.0156	1.94037	2216.63	48.7495	115.909	1.42576	0.642209	4574.76	3.03484	236.17	175.371	0.393846	0.405041	1.70248	0.742563
	0.347555	0.000213851	0.000204066	0.000403351	3.80353	0.000154249	3.74854	0.0819513	84.5768	2.18665	184.94	0.000102152	85.1912	2.17088	2385.93	48.1248	132.538	1.46704	0.716654	9512.17	3.7065	258.117	148.221	0.447183	0.628473	2.17546	0.574237
	0.337311	0.000277705	0.000106202	0.000439446	4.72494	0.000178809	3.32062	0.0342312	60.2629	1.93703	116.731	0.000118416	60.9346	1.91567	2146.75	44.0275	77.4064	2.09865	0.663118	4551.77	3.28358	191.375	84.5618	0.445153	0.495069	2.22537	0.441864
	0.320814	0.000331235	0.000159329	0.000363765	3.0788	0.00013908	4.06585	0.0803867	113.387	2.37175	268.926	9.21057e-05	113.929	2.36047	2693.97	47.6916	189.111	1.58857	0.703209	7392.27	3.99203	274.95	217.449	0.395909	0.3978	2.13282	0.790869
	0.333151	0.000280605	0.000182822	0.000468858	1.37306	0.000184835	3.30905	0.081479	207.082	1.93028	399.727	0.000122407	207.28	1.92844	2152.7	46.2662	284.141	1.60287	0.710838	18763.9	6.50313	210.596	1021.1	0.45363	0.50984	2.3157	4.84863
	0.335839	0.000332422	0.000152658	0.000414254	1.62952	0.000158701	3.6325	0.0424699	191.532	2.11896	405.849	0.0001051	191.79	2.11611	2353.59	46.4423	281.093	1.71187	0.692604	12770.4	5.55362	232.944	726.038	0.413901	0.405479	2.18178	3.1168
	0.326689	0.000275237	0.000190423	0.000509022	4.60887	0.000175645	3.98632	0.0865711	74.1742	2.32535	172.481	0.000116321	74.9614	2.30093	2618.42	46.1442	130.208	1.6474	0.754914	9240.77	4.18336	252.362	109.929	0.458557	0.589346	2.62561	0.435599
	0.332613	0.000276135	0.000197951	0.000473418	4.65879	0.000133844	3.66311	0.0202369	67.4268	2.13682	144.079	8.86383e-05	68.1578	2.1139	2384.95	47.8728	94.4152	1.5547	0.655303	3728.36	2.7145	249.601	84.7808	0.393277	0.411245	1.83813	0.339666
	0.354874	0.00015521	0.000128974	0.000505492	3.87398	0.000116181	3.60371	0.0533949	79.8259	2.10216	167.807	7.69413e-05	80.4272	2.08645	2268.02	46.8049	99.5143	2.23012	0.593028	5276.2	2.41908	234.72	126.073	0.410488	0.626849	1.57484	0.537119
	0.323977	0.000283426	0.00023653	0.000500687	1.44316	0.0001976	3.6211	0.041043	215.599	2.11231	455.413	0.000130861	215.827	2.11008	2388.11	46.6065	352.701	1.48241	0.774465	28652.2	7.74573	233.858	1062.62	0.476585	0.590455	2.70881	4.54387
	0.334278	0.000212644	0.000136718	0.000402931	4.08212	0.000165323	2.65291	0.0374408	55.7591	1.54753	86.2891	0.000109485	56.2249	1.53471	1722.93	46.0206	51.4754	1.72511	0.596546	2824.7	2.47573	167.05	87.9956	0.432284	0.4789	1.64836	0.526762
	0.318614	0.00028601	0.000102132	0.00050234	2.77708	0.000169696	4.43008	0.0624762	136.993	2.58421	354.018	0.000112381	137.526	2.57419	2944.81	44.361	267.113	2.27838	0.754517	18218.2	5.7888	259.198	337.256	0.458346	0.613014	2.83795	1.30115
	0.307382	0.000328818	0.00028768	0.000461657	2.61275	0.000142934	4.33297	0.0549515	142.43	2.52756	360	9.46586e-05	142.921	2.51888	2927.73	49.4333	274.793	1.27349	0.763314	12412.2	4.94551	314.805	331.269	0.407364	0.439469	2.33903	1.0523
	0.280185	0.000347541	0.000276779	0.000391953	5.64765	0.000146815	2.81222	0.0481764	42.6564	1.64046	69.9761	9.72287e-05	43.3312	1.61492	1974.79	48.4992	42.5262	1.19173	0.607724	1146.38	1.99835	196.668	41.8298	0.372205	0.273813	1.54033	0.212692
	0.294946	0.000227893	0.000242167	0.000506063	1.88931	0.000126731	4.04783	0.0919833	184.067	2.36124	434.626	8.3928e-05	184.4	2.35698	2784.18	48.8939	298.883	1.58084	0.687679	13945.3	4.57304	287.706	592.457	0.407515	0.526075	1.94058	2.05924
	0.310088	0.000344055	0.00021782	0.000481576	2.80472	0.000138911	3.63039	0.0599755	111.155	2.11773	235.397	9.19938e-05	111.597	2.10936	2443.43	48.0219	157.469	1.48962	0.66895	5240.85	3.63835	248.914	227.018	0.384033	0.34182	1.90361	0.912031
	0.284074	0.000244586	0.000150608	0.000471696	3.95513	0.000133884	3.88645	0.0950662	84.3172	2.2671	191.155	8.86649e-05	84.9789	2.24944	2714.4	47.248	127.551	1.77627	0.667263	5587.17	3.15604	257.952	129.762	0.408401	0.494209	1.95657	0.503049
	0.323824	0.000385587	0.000197014	0.000520216	4.42568	0.000140303	2.53961	0.0361026	49.2194	1.48144	72.9157	9.29158e-05	49.7017	1.46707	1675.25	46.2564	39.3788	1.65316	0.540059	810.752	1.83768	161.558	58.0269	0.35022	0.214256	1.33724	0.35917
	0.329486	0.000253786	0.00021553	0.000525666	2.27875	0.000161198	3.70903	0.0309529	139.814	2.1636	302.501	0.000106754	140.181	2.15794	2426.17	47.0876	216.194	1.6244	0.71469	13576.4	4.94714	244.507	404.47	0.44184	0.550137	2.25991	1.65422
	0.301575	0.000360034	0.000106469	0.000444396	4.87323	0.000146589	3.08852	0.0473086	54.3372	1.80163	97.8958	9.70787e-05	54.9808	1.78054	2104.37	43.8744	56.4694	2.30795	0.576832	1511.78	2.29921	176.762	62.6035	0.377025	0.29097	1.69569	0.354168
	0.3158	0.000309844	0.000218646	0.000373595	4.74971	0.0001744	3.47969	0.0651277	62.819	2.02982	127.511	0.000115497	63.5264	2.00722	2322.61	47.5197	92.2578	1.31143	0.723527	5065.95	3.49638	233.617	85.5147	0.434127	0.453457	2.27422	0.366046
	0.295397	0.000187947	0.000206154	0.000373785	4.0332	0.000183631	3.47487	0.00826791	73.9238	2.02701	149.844	0.00012161	74.5268	2.01061	2388.55	47.317	110.868	1.45023	0.739887	10809.9	4.0357	231.309	134.647	0.49293	0.788456	2.39864	0.582112
	0.307868	0.000235758	0.00026799	0.000409948	4.15901	0.000169422	3.49575	0.0512	72.1108	2.03919	147.048	0.0001122	72.7358	2.02167	2360.38	48.1986	106.744	1.30929	0.725915	7360.56	3.65352	241.45	117.021	0.452919	0.583111	2.22521	0.484659
	0.274339	0.000249141	0.000113675	0.000546559	2.73705	0.000156478	3.54839	0.0443812	111.335	2.06989	230.451	0.000103628	111.756	2.06209	2511.98	44.9351	151.376	2.19274	0.656868	7679.41	4.0184	213.02	262.624	0.432832	0.519824	2.0963	1.23286
	0.316098	0.000225068	0.000173385	0.000449553	3.8522	0.000111467	3.83302	0.0508391	85.3869	2.23593	190.919	7.38193e-05	86.023	2.2194	2557.33	48.9249	119.559	1.64775	0.626228	4220.81	2.54395	272.784	124.861	0.377922	0.44117	1.60721	0.457729
	0.35652	0.000280276	0.000182977	0.000501022	5.48127	0.000170483	4.16692	0.0508453	65.1358	2.4307	158.326	0.000112903	66.1075	2.39497	2615.78	46.0756	119.957	1.65968	0.757658	8528.92	3.89731	263.011	80.1446	0.453175	0.584702	2.65261	0.304719
	0.35313	0.000375282	0.00019432	0.000514023	1.79383	0.000169864	3.5393	0.0485755	169.515	2.06459	349.978	0.000112493	169.791	2.06123	2233.5	46.1521	245.957	1.65048	0.702777	11266.4	5.56035	224.139	586.253	0.415723	0.374463	2.27468	2.61557
	0.313094	0.000278569	0.000102625	0.000376498	3.25667	0.000156221	3.42447	0.0466615	90.2744	1.99761	180.333	0.000103457	90.7565	1.98699	2294.79	45.2264	116.935	2.03299	0.648442	5409.48	3.526	208.255	173.444	0.419604	0.44724	2.01663	0.832846
	0.301325	0.000365401	0.000208856	0.000370586	3.95154	0.000159404	3.68792	0.0666782	80.0829	2.15129	172.281	0.000105566	80.7102	2.13457	2513.67	47.6151	123.14	1.38186	0.714762	5015.44	3.69208	248.593	122.923	0.406962	0.373749	2.21056	0.494476
	0.313713	0.000326876	0.000196876	0.000447501	5.20567	0.00017385	3.38398	0.0298963	55.7144	1.97399	109.979	0.000115133	56.4656	1.94772	2265.61	46.2353	76.1463	1.51467	0.692368	3698.99	3.16644	215.076	67.8696	0.425975	0.415776	2.19986	0.31556
	0.301927	0.000231521	0.000125448	0.000544095	3.34048	0.000155506	3.4506	0.0641005	88.6764	2.01285	178.493	0.000102984	89.1745	2.00161	2349.89	45.2614	115.991	2.09782	0.649834	6344.37	3.49567	210.169	172.194	0.435025	0.539605	2.02218	0.819313
	0.310675	0.000297736	0.000195207	0.000416949	3.87515	0.000172411	3.87217	0.0540902	85.7465	2.25877	193.681	0.000114179	86.3928	2.24187	2603.94	47.1311	146.047	1.46282	0.75406	9001.41	4.34893	255.733	146.87	0.445319	0.521052	2.51111	0.57431
	0.354519	0.000331222	0.000124715	0.000446401	1.88069	0.000134569	3.48881	0.0638261	159.375	2.03514	324.349	8.91185e-05	159.66	2.0315	2196.91	46.0594	201.013	2.00178	0.619742	6452.93	3.98224	220.056	478.338	0.37826	0.33127	1.77604	2.17372
	0.415651	0.000220947	0.000224484	0.000397638	1.74535	0.000174378	3.29282	0.0318928	162.093	1.92081	311.351	0.000115482	162.343	1.91785	1877.12	47.9295	222.084	1.39197	0.713293	19479.5	5.42403	224.901	639.746	0.461597	0.607518	2.1727	2.84457
	0.297674	0.000270119	0.000129707	0.000420764	2.74764	0.000137275	4.02332	0.0458955	125.749	2.34694	295.125	9.09108e-05	126.228	2.33803	2756.61	47.0384	202.391	1.82012	0.685781	8937.6	4.07624	264.672	279.242	0.409045	0.476898	2.08513	1.05505
	0.323205	0.000351451	0.000231389	0.0005465	3.52442	0.000134785	3.29048	0.0153903	80.1378	1.91945	153.82	8.92617e-05	80.6384	1.90753	2172.55	47.6649	95.6712	1.53693	0.621967	2679.15	2.75172	222.267	125.067	0.368929	0.293622	1.67035	0.562687
	0.357327	0.000220344	0.000153238	0.000502264	3.8104	0.000196906	3.63181	0.0893096	81.7947	2.11855	173.286	0.000130402	82.391	2.10322	2277.01	45.0069	129.16	1.85869	0.745354	13485	4.67084	218.725	159.685	0.49906	0.754367	2.69052	0.730072
	0.29864	0.000360866	0.000261154	0.00045861	2.88269	0.000166183	3.47173	0.0361404	103.418	2.02518	209.439	0.000110055	103.851	2.01672	2375.41	47.8195	149.207	1.32634	0.712413	6344.48	4.23693	236.033	220.621	0.412306	0.372756	2.17733	0.934704
	0.313515	0.000298437	0.000152246	0.000398806	1.22053	0.000132483	3.81581	0.0698303	268.65	2.22589	597.985	8.77372e-05	268.853	2.22421	2555.46	47.9209	400.308	1.64827	0.669429	14821.5	5.5326	260.528	1282.42	0.390354	0.396298	1.91438	4.92237
	0.289289	0.00030696	0.000168541	0.00045226	3.13263	0.000175458	3.26434	0.059912	89.4678	1.9042	170.364	0.000116197	89.9102	1.89483	2263.29	46.0039	116.294	1.64732	0.682619	5776.17	3.94933	205.401	184.024	0.43207	0.434711	2.15991	0.895928
	0.298919	0.000275756	0.000144212	0.000478559	3.42513	0.00014936	3.52929	0.0811164	88.4518	2.05875	182.1	9.89137e-05	88.9739	2.04667	2413.84	46.2799	119.91	1.8238	0.658483	5286.89	3.41375	224.745	159.212	0.413491	0.444934	1.98597	0.708413
	0.32817	0.000265447	9.38429e-05	0.00044331	5.28966	0.000154089	4.43564	0.0510843	71.863	2.58746	185.942	0.000102046	72.8629	2.55195	2907.15	44.5735	133.748	2.24934	0.7193	8106.43	3.71952	262.016	89.2308	0.441242	0.594573	2.55467	0.340555
	0.30974	0.000334228	9.32901e-05	0.000417609	5.01656	0.000164026	3.97113	0.065689	67.8593	2.31649	157.196	0.000108626	68.7102	2.2878	2674.1	43.3891	107.522	2.41607	0.684003	4988.19	3.55003	222.276	85.7055	0.42552	0.450638	2.43794	0.385581
	0.259876	0.000275051	0.000189659	0.000424608	5.01167	0.000132014	3.84707	0.0348137	65.8038	2.24412	147.672	8.74268e-05	66.6273	2.21638	2777.71	48.2302	99.1428	1.49699	0.671373	3636.11	2.74361	266.064	77.109	0.394411	0.426965	1.9009	0.289814
	0.313262	0.000280758	0.000229632	0.000440038	3.47637	0.000137485	3.15231	0.0422334	77.8364	1.83885	143.129	9.10494e-05	78.3096	1.82773	2111.89	48.569	89.6773	1.39498	0.626548	3147.71	2.71748	221.088	128.999	0.386425	0.359231	1.63252	0.583474
	0.297131	0.000218423	0.000157821	0.000473217	2.26601	0.000164016	3.13821	0.0388714	118.962	1.83062	217.774	0.00010862	119.27	1.82588	2151.83	46.31	142.027	1.77525	0.652178	8516.92	4.07985	200.101	347.91	0.444174	0.550301	1.94559	1.73867
	0.3217	0.000301042	0.000190537	0.000384973	1.96393	0.000123982	3.02859	0.0344262	132.482	1.76668	234.054	8.21071e-05	132.741	1.76324	2004.08	48.9906	137.967	1.42938	0.589466	3633.34	3.0396	216.115	362.103	0.359728	0.291461	1.42024	1.67552
	0.321667	0.000233482	0.000189439	0.000462306	3.75517	0.00012348	3.41807	0.0889339	78.1165	1.99387	155.754	8.1775e-05	78.6698	1.97985	2261.91	48.3745	95.8701	1.60627	0.615521	3561.66	2.52354	237.81	119.689	0.385982	0.420257	1.58826	0.503297
	0.322706	0.000239301	0.000252367	0.000458829	2.26972	0.000166049	3.89903	0.070172	147.561	2.27444	335.618	0.000109966	147.945	2.26853	2576.24	48.04	254.653	1.4328	0.75876	19107.5	5.53072	267.535	444.549	0.458301	0.631792	2.44721	1.66165
	0.332435	0.000240313	0.000133751	0.000521905	3.41415	8.70001e-05	4.24302	0.0283209	106.682	2.4751	264.049	5.76159e-05	107.308	2.46066	2763.25	48.9455	153.884	1.98425	0.582787	3527.56	2.25262	302.216	156.804	0.336562	0.357547	1.3908	0.518847
	0.336713	0.000280459	0.000224832	0.000496346	3.18282	0.000169031	3.57651	0.0698121	96.4749	2.08629	201.275	0.000111941	96.9672	2.0757	2314.26	47.0923	144.483	1.50859	0.717838	8757.25	4.24077	235.818	198.767	0.439734	0.502111	2.27941	0.842883
	0.298391	0.000299096	0.00022717	0.000495819	3.2155	0.000157999	3.18694	0.0775085	85.0909	1.85905	158.188	0.000104635	85.534	1.84942	2181.33	47.3043	104.095	1.48717	0.658048	4373.23	3.36466	212.028	161.839	0.410117	0.392119	1.89837	0.763288
	0.297608	0.000272223	0.00016592	0.00043111	5.14186	0.000133795	2.96163	0.0625318	49.3692	1.72762	85.2911	8.86058e-05	50.019	1.70517	2029.38	47.2121	49.4963	1.61218	0.580322	1494.09	1.9647	196.271	53.9588	0.377483	0.336374	1.48218	0.27492
	0.308291	0.000302697	9.02697e-05	0.000413631	2.10029	0.000139962	3.59838	0.0982629	147.179	2.09906	308.938	9.26903e-05	147.508	2.09438	2428.19	44.7993	192.836	2.35987	0.62419	6853.71	4.05673	214.718	413.149	0.395127	0.388686	1.9044	1.92415
	0.326664	0.000256499	0.000208443	0.000575536	4.01847	0.000156043	3.88829	0.0342136	83.0232	2.26817	188.311	0.00010334	83.6955	2.24995	2554.13	46.5399	133.635	1.73718	0.709654	7941.06	3.76511	250.397	134.47	0.436718	0.549378	2.28092	0.537027
	0.329743	0.000307694	0.000121263	0.000483454	2.63149	0.000179004	2.83013	0.0185481	92.3663	1.65091	152.488	0.000118546	92.6893	1.64516	1850.54	44.1824	94.0876	2.05431	0.617015	4296.59	3.6241	164.257	222.132	0.424234	0.384139	1.9132	1.35235
	0.361744	0.000278463	0.000144963	0.000384222	3.20209	0.000131273	3.76079	0.0664093	100.834	2.19379	221.209	8.69361e-05	101.355	2.18252	2341.67	47.8196	145.709	1.65036	0.658696	5952.42	3.30744	255.686	184.071	0.391983	0.412959	1.86135	0.71991
	0.358043	0.00037515	0.000214286	0.000440305	1.89695	0.000165617	3.58996	0.0596646	162.588	2.09414	340.482	0.00010968	162.884	2.09033	2248.26	47.2019	243.347	1.46219	0.714712	11076.3	5.39248	237.808	526.503	0.411651	0.370386	2.24912	2.21399
	0.333972	0.000233956	0.000133395	0.000388711	1.82514	0.000181118	3.38963	0.0255625	159.56	1.97729	315.495	0.000119946	159.829	1.97396	2202.4	46.1421	224.002	1.70767	0.71	17399.7	5.65796	214.568	610.229	0.467751	0.613346	2.32269	2.84399
	0.302068	0.000221477	0.000110562	0.000479379	4.23103	0.000179376	3.43334	0.0744715	69.6136	2.00278	139.421	0.000118792	70.2378	1.98499	2337.67	44.4938	95.2578	2.08383	0.683238	7042.93	3.65414	202.085	115.258	0.470128	0.645254	2.3132	0.570343
	0.363048	0.000204559	0.000153503	0.000500316	2.07967	0.000173649	4.2966	0.0487467	177.482	2.50635	444.832	0.000114999	177.87	2.50088	2669.83	46.0832	347.642	1.88921	0.781513	37542.7	6.75787	271.286	628.037	0.493195	0.85209	2.82135	2.31504
	0.282865	0.000238262	0.000143995	0.000533799	2.28105	0.000159294	4.32904	0.050771	163.02	2.52527	411.671	0.000105493	163.449	2.51865	3028.62	46.0862	309.255	1.94752	0.751219	21574.9	5.84696	273.371	489.18	0.458768	0.675854	2.60651	1.78944
	0.286295	0.000299795	0.000249159	0.000314452	3.82056	0.000211252	3.13298	0.0717523	70.3721	1.82757	128.61	0.000139902	70.8878	1.81428	2181.37	47.76	97.8598	1.12606	0.760902	7124.43	4.3619	212.474	129.558	0.471886	0.513122	2.48999	0.609759
	0.332698	0.000311985	0.000187854	0.000470821	2.75346	0.000180236	3.61197	0.0514146	112.653	2.10698	237.359	0.000119362	113.085	2.09895	2351.36	46.3185	174.018	1.58495	0.733142	10671.1	4.96262	230.394	271.981	0.445666	0.486688	2.45775	1.1805
	0.321376	0.000246074	0.000207923	0.000411488	2.6886	0.00016858	3.53389	0.0377828	112.881	2.06143	232.697	0.000111643	113.293	2.05394	2339.56	47.7592	168.29	1.42785	0.723213	11358.7	4.56464	239.654	281.851	0.450034	0.564765	2.2495	1.17608
	0.360914	0.000329305	0.000212267	0.000383089	3.97603	0.000161234	4.15356	0.0657194	89.637	2.42291	217.183	0.000106777	90.3479	2.40385	2589.6	47.9961	167.003	1.35735	0.768952	9581.85	4.349	284.479	143.784	0.42793	0.472394	2.518	0.50543
	0.326474	0.000249289	0.000188611	0.000524154	3.76352	0.000179711	3.81413	0.0233331	86.974	2.22491	193.509	0.000119014	87.5927	2.20919	2506.12	45.9794	144.271	1.71215	0.745553	11357.3	4.50542	239.739	161.826	0.469766	0.639211	2.57929	0.675009
	0.299417	0.000293217	0.000210294	0.000465554	2.24901	0.000135328	3.64373	0.03706	139.17	2.12551	295.807	8.96214e-05	139.526	2.12009	2490.34	48.4535	197.568	1.49103	0.667894	7323.23	3.97025	254.34	361.855	0.391928	0.392729	1.86395	1.42272
	0.301725	0.000312521	0.000151651	0.0005047	5.50807	0.000156896	4.07555	0.0569115	63.3958	2.37741	150.718	0.000103904	64.3506	2.34213	2776.29	45.5683	107.139	1.83786	0.710862	5156.25	3.38966	251.611	72.5326	0.423464	0.471935	2.38734	0.288273
	0.336959	0.000275708	0.000207964	0.000446083	3.07437	0.000164112	3.49162	0.110145	97.514	2.03678	198.614	0.000108683	97.9785	2.02712	2258.49	47.4417	139.859	1.47185	0.704176	8002.86	4.05094	233.65	204.71	0.432762	0.484294	2.16128	0.876142
	0.310572	0.000223487	0.000118429	0.000419635	4.17491	0.000137341	3.87833	0.0726191	79.6971	2.26236	180.304	9.09543e-05	80.3931	2.24278	2608.47	46.7544	120.402	1.88238	0.667771	6217.42	3.14548	252.063	119.704	0.42081	0.553187	2.00114	0.474899
	0.288488	0.000269762	0.00019214	0.00041635	3.05338	0.000123994	4.26148	0.100859	119.835	2.48587	297.893	8.21155e-05	120.398	2.47424	2957.98	49.2537	209.138	1.47369	0.702056	8245.28	3.74274	307.366	230.135	0.393183	0.456459	1.99313	0.748733
	0.324502	0.000305854	0.000201184	0.000477822	4.2335	0.000134159	3.74825	0.0777684	75.9541	2.18648	166.072	8.88471e-05	76.6359	2.16702	2470.04	47.9079	110.397	1.54126	0.664754	4015.48	2.94218	255.777	103.702	0.387907	0.381513	1.88876	0.405438
	0.337261	0.000327713	0.000212243	0.000408372	4.91355	0.000132773	4.09799	0.0557333	71.5028	2.39049	170.927	8.79292e-05	72.3636	2.36206	2649.51	48.6136	119.751	1.39509	0.700599	4475.11	3.03264	287.941	83.8352	0.386872	0.384102	2.03748	0.291154
	0.32939	0.000226646	0.00016911	0.000437825	3.5387	0.000203338	2.90085	0.00708351	70.3627	1.69216	119.065	0.000134661	70.8058	1.68157	1897.78	45.486	81.4968	1.63599	0.684474	6837.77	3.83142	178.443	142.995	0.482366	0.605514	2.2214	0.801349
	0.257664	0.000291569	0.00019793	0.000460819	4.23638	9.87724e-05	4.02234	0.0787806	81.4527	2.34637	191.118	6.54122e-05	82.1849	2.32546	2912.94	49.8146	117.42	1.52679	0.614385	2465.69	2.23397	296.763	97.6412	0.340814	0.316186	1.49223	0.329021
	0.31666	0.000341855	0.000257302	0.000494243	2.88848	0.000153534	3.48917	0.0440755	103.728	2.03535	211.124	0.000101678	104.165	2.02682	2326.01	47.978	145.412	1.38719	0.688752	5765.69	3.86434	238.794	214.793	0.401016	0.365357	2.02168	0.89949
	0.311681	0.000231203	0.000238294	0.000391256	2.91647	0.000164703	3.65513	0.0702563	107.618	2.13216	229.458	0.000109075	108.079	2.12305	2454.39	48.5279	169.448	1.33125	0.738472	12023.7	4.47499	255.919	249.486	0.453313	0.607026	2.27172	0.974864
	0.252632	0.000285398	0.000168696	0.000327821	3.53548	0.000178734	3.68358	0.00368322	89.4303	2.14876	192.164	0.000118367	89.9924	2.13533	2685.69	47.2157	144.247	1.42022	0.750644	8783.18	4.48054	244.152	170.838	0.453004	0.536735	2.4795	0.699718
	0.338624	0.000180557	0.000149143	0.000420996	3.21803	0.000167763	3.63408	0.0297887	96.9528	2.11988	205.528	0.000111102	97.4585	2.10888	2344.74	46.5398	146.413	1.77114	0.712377	13671.5	4.237	234.024	215.616	0.479922	0.786455	2.29848	0.92134
	0.312973	0.000311373	0.000247536	0.000478515	4.55335	0.000157519	3.47511	0.0605182	65.4539	2.02715	132.685	0.000104317	66.1322	2.00636	2329.13	47.6091	91.3888	1.39734	0.688767	4066.44	3.14305	234.189	88.2769	0.412251	0.407381	2.05321	0.376948
	0.285827	0.000299568	0.000294971	0.000492815	1.33084	0.000155739	3.76308	0.0684557	242.971	2.19513	533.352	0.000103139	243.189	2.19316	2621.8	48.6812	390.499	1.33034	0.732161	19162.3	6.42362	265.145	1149.1	0.421706	0.457628	2.21902	4.33385
	0.345918	0.000201904	9.96102e-05	0.000455449	1.77788	0.000183754	4.4909	0.0543711	217.022	2.61969	568.532	0.000121691	217.37	2.6155	2865.61	44.9838	456.267	2.14135	0.802535	55605.8	8.19251	270.187	935.112	0.513339	0.955403	3.12237	3.46098
	0.337132	0.000209871	0.000280875	0.000493791	3.53089	0.000165904	4.24328	0.0461255	103.153	2.47525	255.329	0.00010987	103.799	2.45983	2743.98	47.5609	199.637	1.55002	0.781883	18633.9	4.89269	285.378	207.95	0.477437	0.780455	2.65126	0.728684
	0.318128	0.000295032	9.0773e-05	0.000535436	2.81961	0.000160488	3.5042	0.0180774	106.724	2.04412	218.157	0.000106283	107.152	2.03595	2331.01	43.5439	139.737	2.53253	0.640537	6410.15	3.95977	197.543	238.623	0.42266	0.444507	2.12276	1.20795
	0.327679	0.000276426	0.000232272	0.000488596	5.73642	0.000175507	4.09799	0.0769661	61.1913	2.39049	146.277	0.00011623	62.1891	2.35214	2687.82	46.7158	112.988	1.47882	0.772422	8215.96	3.89388	265.899	72.8821	0.459229	0.599403	2.68195	0.274097
	0.385553	0.000266919	0.000130476	0.000428645	6.16916	0.000156247	3.79037	0.0453398	52.6002	2.21105	116.302	0.000103475	53.5888	2.17026	2272.05	45.5778	79.4353	1.82581	0.683011	4658.46	2.90664	234.103	54.3995	0.429061	0.509899	2.20301	0.232374
	0.287554	0.000286564	0.000273491	0.000509414	4.3782	0.000163719	3.71564	0.0811858	72.7956	2.16746	157.781	0.000108423	73.4939	2.14686	2582.48	47.5652	114.501	1.41273	0.725692	6169.76	3.65658	249.936	107.324	0.433246	0.492289	2.28347	0.429403
	0.320845	0.000308941	0.000216437	0.000415097	2.55323	0.000152506	3.28038	0.0507529	110.347	1.91355	211.155	0.000100997	110.71	1.90727	2173.43	48.1235	141.033	1.3855	0.667911	5803.33	3.78022	225.869	259.845	0.403027	0.377888	1.88969	1.15042
	0.349871	0.000300174	0.000151789	0.000508433	2.59136	0.000140867	4.36051	0.0551793	144.52	2.54363	367.605	9.32893e-05	145.01	2.53504	2765.6	46.8254	264.711	1.83569	0.720095	12921.1	4.78372	284.262	343.081	0.41238	0.477484	2.31998	1.20692
	0.327154	0.000267806	0.000205187	0.000451468	3.01363	0.000154625	3.83498	0.0329341	109.267	2.23707	244.437	0.0001024	109.767	2.22688	2517.28	47.8144	176.492	1.49549	0.722033	10071.7	4.28758	260.674	232.823	0.430558	0.516052	2.237	0.893157
	0.352791	0.000261174	0.000106874	0.00044745	5.93038	0.000171448	3.47085	0.0475821	50.1201	2.02466	101.476	0.000113542	50.9923	1.99003	2191.45	44.1574	67.3559	2.07849	0.663761	4105.11	2.93692	201.215	55.7942	0.44383	0.524326	2.21659	0.277287
	0.301922	0.000278452	0.000181705	0.000483292	4.16139	0.000119584	3.7009	0.0697485	76.2989	2.15886	164.718	7.91945e-05	76.961	2.14029	2520.36	48.2	103.365	1.63404	0.627524	3155.86	2.53764	255.634	101.714	0.372277	0.368921	1.66278	0.397888
	0.342604	0.000217743	0.000174378	0.00041755	4.66911	0.000178592	3.98802	0.0567684	73.2444	2.32634	170.392	0.000118273	74.0418	2.30129	2557.62	46.6574	131.159	1.58316	0.769748	12595.8	4.26906	258.116	113.217	0.484549	0.757579	2.67009	0.438628
	0.329335	0.000294644	0.000180225	0.000549322	5.40618	0.000139065	3.10427	0.0585958	49.2029	1.81082	89.0977	9.20962e-05	49.9174	1.78491	2031.03	46.289	52.8777	1.74962	0.59348	1710.12	2.1107	197.757	51.7622	0.382126	0.338123	1.6126	0.261746
	0.352225	0.000275063	0.000125523	0.000518364	3.58069	0.000153916	4.06374	0.0331365	97.4108	2.37052	230.914	0.000101931	98.0386	2.35533	2568.04	45.4742	162.703	2.03794	0.704604	9341.58	4.09781	249.847	175.151	0.431858	0.528984	2.3552	0.701031
	0.326727	0.000262465	0.000152028	0.000425929	4.54981	0.000155115	3.81949	0.0401359	71.9965	2.22803	160.411	0.000102725	72.7414	2.20522	2508.7	46.6833	112.709	1.67461	0.702628	6345.03	3.43719	247.484	101.689	0.431394	0.523086	2.22227	0.410892
	0.306366	0.000338195	0.000199625	0.000468698	3.71475	0.000145333	3.34148	0.0648081	77.1994	1.9492	150.477	9.62473e-05	77.7346	1.93578	2261.11	47.2922	97.1363	1.54001	0.645523	3226.61	2.9897	222.196	119.924	0.387108	0.333882	1.82774	0.53972
	0.244969	0.000334567	0.000244142	0.000413588	1.44266	0.000144838	3.90687	0.0609695	232.695	2.27901	530.315	9.59193e-05	232.941	2.27661	2877.7	49.1261	384.985	1.30328	0.725955	14494.2	5.93166	280.332	964.733	0.400754	0.395574	2.14222	3.4414
	0.318389	0.000317993	0.000200048	0.000467427	0.899934	0.000180902	3.0435	0.0657962	290.63	1.77538	515.979	0.000119803	290.75	1.77465	2023.78	46.4701	349.619	1.52976	0.677584	17657.3	7.06012	195.406	2075.45	0.430546	0.405208	2.08568	10.6212
	0.309646	0.000325106	0.000255096	0.000480043	2.92561	0.000173964	3.96051	0.0227573	116.244	2.3103	268.559	0.000115208	116.746	2.30037	2667.32	47.6181	208.186	1.37551	0.775197	12424	5.23909	267.001	262.065	0.442217	0.494051	2.59986	0.981512
	0.340854	0.000283494	0.000247427	0.000477126	2.42118	0.000140578	2.69437	0.0654394	95.584	1.57172	150.231	9.30981e-05	95.8672	1.56707	1732.57	48.2622	87.5753	1.41439	0.582938	2833.94	2.74587	186.59	222.942	0.378525	0.311891	1.4312	1.19482
	0.348231	0.000266354	0.000201735	0.000415796	3.30932	0.000161162	3.47479	0.0396157	90.1406	2.02696	182.711	0.000106729	90.6376	2.01585	2209.4	47.7057	127.852	1.44069	0.699747	7423.4	3.80352	235.118	175.155	0.431247	0.489551	2.11062	0.744964
	0.330591	0.000214782	0.000150032	0.000429316	4.13232	0.000168157	3.8681	0.0648243	80.3089	2.25639	181.208	0.000111362	80.9962	2.23725	2526.05	46.4585	132.883	1.71521	0.733314	10928.8	4.04594	248.225	135.868	0.46914	0.703022	2.4441	0.547357
	0.309308	0.000309073	8.77088e-05	0.000441306	3.69613	0.000170033	3.7263	0.0664624	86.525	2.17367	188.077	0.000112605	87.1189	2.15886	2510.81	43.3145	127.016	2.47584	0.675342	6482.69	3.99976	207.856	152.058	0.435733	0.47669	2.38478	0.731554
	0.343767	0.000292766	0.000135129	0.000427507	3.57896	0.000122314	3.72265	0.0543383	89.2778	2.17154	193.871	8.10026e-05	89.8527	2.15765	2383.21	47.3292	121.306	1.8134	0.625704	3889.24	2.81182	247.929	138.939	0.373599	0.361806	1.71455	0.560399
	0.319407	0.000258747	0.000174328	0.000468464	2.40803	0.000173632	3.93425	0.0553407	140.332	2.29498	322.059	0.000114988	140.743	2.28827	2612.17	46.6334	243.62	1.64738	0.756446	18006.6	5.65663	254.375	401.799	0.462139	0.616313	2.58125	1.57955
	0.302137	0.000296045	0.000245037	0.000431318	3.56249	0.000151307	3.78345	0.0459195	91.1566	2.20701	201.183	0.000100204	91.7382	2.19302	2575.79	48.5754	144.868	1.33255	0.720077	6895.21	3.80116	265.423	158.68	0.415959	0.449867	2.15573	0.597839
	0.315917	0.000272315	0.000264263	0.000402029	6.08387	0.000154631	4.29882	0.039679	60.4988	2.50764	151.709	0.000102405	61.6053	2.4626	2868.86	48.645	117.194	1.2534	0.772493	7180.71	3.49398	302.443	64.4897	0.436077	0.561253	2.4739	0.21323
	0.37197	0.000364592	0.000248476	0.000443629	3.77318	0.000172552	3.36114	0.0299142	76.4477	1.96067	149.889	0.000114273	76.9943	1.94675	2059.3	47.3275	105.806	1.34205	0.705896	5107.17	3.70464	223.837	125.623	0.415954	0.369797	2.18234	0.561226
	0.333311	0.000326571	0.000122268	0.000420909	0.619734	0.000136478	4.00784	0.0772481	555.779	2.33791	1299.36	9.03831e-05	555.888	2.33745	2606.67	46.3491	875.358	1.97991	0.673684	32915.5	8.42807	255.983	5261.98	0.393072	0.392074	2.07252	20.556
	0.363312	0.000285604	0.000213306	0.000412371	3.10054	0.000153791	3.90908	0.0540477	108.25	2.2803	246.842	0.000101848	108.774	2.2693	2428.03	48.324	181.344	1.3914	0.734659	10445.2	4.32268	271.405	221.531	0.425474	0.490453	2.26733	0.816239
	0.312446	0.000306899	0.000154494	0.000423393	4.09879	0.00016998	3.7786	0.0889713	79.0947	2.20419	174.339	0.00011257	79.7608	2.18578	2534.49	46.0399	125.905	1.68303	0.722185	6981.13	3.981	238.132	125.715	0.437161	0.485902	2.41378	0.527922
	0.315309	0.0002321	0.000229597	0.000314417	2.81275	0.000175844	3.44272	1e-05	105.108	2.00825	211.083	0.000116453	105.528	2.00027	2299.58	49.0232	157.934	1.18278	0.748205	12178.9	4.6125	245.992	257.806	0.46253	0.608247	2.28511	1.04802
	0.35209	0.000239066	0.000188793	0.000416801	3.74161	0.000149898	3.63072	0.0873476	83.2779	2.11792	176.376	9.92701e-05	83.8635	2.10313	2294.87	47.8932	122.055	1.50487	0.692016	7186.17	3.45656	247.604	142.14	0.428417	0.529276	2.04811	0.574061
	0.283141	0.000262739	0.000188662	0.000471627	5.07022	0.000124266	3.97859	0.0491605	67.2637	2.32084	156.108	8.22953e-05	68.1249	2.2915	2782.37	48.1665	103.257	1.59384	0.661444	3743.63	2.63562	274.434	76.783	0.388731	0.434998	1.84997	0.279787
	0.245364	0.000290386	0.000122102	0.000467461	0.642581	0.000169784	4.40375	0.0730132	588.966	2.56886	1512.97	0.000112439	589.09	2.56832	3242	45.4619	1168.86	1.994	0.772559	72833.8	12.1157	270.605	6257.61	0.45737	0.602709	2.83293	23.1245
	0.322269	0.00025519	0.000250472	0.000470394	4.27572	0.000128799	3.79541	0.0540831	76.1475	2.21399	168.59	8.52973e-05	76.8446	2.19391	2509.39	48.9678	112.932	1.43107	0.669865	4679.31	2.85688	270.581	104.831	0.39505	0.444433	1.83579	0.387428
	0.292011	0.000363005	0.000175888	0.000419891	3.7447	0.000130192	3.66971	0.0415533	84.1027	2.14066	180.036	8.62199e-05	84.695	2.12569	2534.6	47.5595	115.918	1.61027	0.64386	3114.28	2.92571	246.788	123.219	0.368051	0.305993	1.79795	0.499292
	0.316895	0.00023384	0.000131533	0.000405748	3.30401	0.000154344	3.78022	0.0366975	98.2219	2.20513	216.592	0.000102215	98.7617	2.19308	2519.16	46.7251	151.522	1.75648	0.699574	9344.65	3.96552	245.377	195.278	0.440525	0.580986	2.19906	0.795826
	0.305679	0.000213983	0.000147452	0.000436799	3.26238	0.000153657	3.64161	0.0386749	95.8305	2.12428	203.57	0.00010176	96.344	2.11295	2466.64	46.8685	139.903	1.74624	0.687248	8886.54	3.79349	237.834	194.532	0.444114	0.608981	2.10928	0.817933
	0.370649	0.00028123	0.000141956	0.00045543	1.3307	0.000151502	4.11117	0.0587601	265.474	2.39818	636.654	0.000100333	265.712	2.39603	2524.12	46.7211	461.194	1.80027	0.724402	27143.8	6.79097	266.814	1276.59	0.428737	0.518071	2.35832	4.78458
	0.349556	0.000188029	0.000181091	0.000423302	1.96514	0.000135647	3.59437	0.0624885	157.135	2.09671	329.468	8.98326e-05	157.442	2.09262	2280.78	48.3127	218.242	1.64479	0.662406	13443.7	4.18264	249.439	510.464	0.427815	0.605922	1.84414	2.04645
	0.344421	0.000289507	0.000186623	0.000513862	1.65844	0.000148522	3.35441	0.0575187	173.784	1.95674	340.05	9.83587e-05	174.026	1.95402	2145.33	47.0814	221.954	1.66312	0.65271	9616.56	4.61841	221.072	633.525	0.405116	0.402345	1.88543	2.8657
	0.300759	0.000219517	0.000105864	0.000496592	5.92324	0.000162058	3.69398	0.0277115	53.407	2.15482	115.082	0.000107323	54.3341	2.11805	2519.84	44.4408	77.1092	2.16789	0.670034	4953.19	2.97027	216.908	60.6714	0.452375	0.627593	2.22997	0.27971
	0.366282	0.000289112	0.000219521	0.000483957	3.83143	0.000141237	2.80192	0.0222059	62.7569	1.63445	102.573	9.35343e-05	63.2194	1.6225	1732.22	47.6191	60.1717	1.49548	0.586622	2038.86	2.28673	188.901	92.7904	0.38006	0.31813	1.48876	0.49121
	0.312586	0.000217856	9.85741e-05	0.000441416	3.61853	0.000139532	3.06787	0.0499272	72.768	1.78959	130.225	9.24051e-05	73.2469	1.77789	2057.35	45.6199	76.1462	2.11813	0.584728	3236.7	2.54137	189.829	122.087	0.407231	0.457032	1.61164	0.643141
	0.333797	0.000272779	0.000240661	0.000417427	4.09085	0.000140531	3.67607	0.0731516	77.0984	2.14437	165.328	9.30666e-05	77.7452	2.12654	2389.14	48.9556	113.863	1.33187	0.688708	5183.7	3.12992	261.942	113.677	0.404745	0.439716	1.94149	0.433976
	0.329478	0.000222906	0.000186299	0.000519758	2.68056	0.000151738	4.01837	0.0623896	128.742	2.34405	301.779	0.000100489	129.209	2.33558	2628.55	47.0191	217.38	1.76412	0.720328	14868.2	4.66955	264.129	320.124	0.44683	0.638127	2.3024	1.212
	0.292853	0.000268276	0.000128045	0.000454727	5.14924	0.000158102	3.45619	0.0299304	57.5304	2.01611	115.988	0.000104703	58.2897	1.98985	2384.3	45.3755	75.967	1.89509	0.654957	3619.47	2.87622	211.573	70.5993	0.424444	0.47067	2.04386	0.333688
	0.268527	0.000156472	0.00014185	0.000499529	4.27465	0.000180852	4.12402	0.0723758	82.7613	2.40568	199.097	0.000119769	83.5186	2.38387	2942.87	44.9159	151.105	2.14777	0.75895	18591	4.64016	247.365	151.417	0.524875	1.10588	2.80089	0.612119
	0.34403	0.000318628	0.000208883	0.00041232	2.8986	0.000168469	3.19508	0.0691635	94.6536	1.8638	176.415	0.000111569	95.0547	1.85593	2044.64	47.3363	120.166	1.40972	0.681157	5792.48	3.85463	212.857	203.87	0.418579	0.393856	2.0313	0.957776
	0.281123	0.000209621	0.000122371	0.000509625	4.69171	0.00013154	3.38402	0.0564306	61.8507	1.97401	122.094	8.71128e-05	62.5306	1.95255	2373.23	46.0579	73.3401	2.07209	0.600685	3039.6	2.35126	213.432	79.614	0.405462	0.491773	1.66861	0.373018
	0.320298	0.000248735	0.000168865	0.000420024	4.70791	0.000146546	4.24447	0.0604866	77.3091	2.47594	191.413	9.70503e-05	78.1647	2.44884	2814.45	47.6009	140.464	1.58081	0.733828	8347.23	3.62516	285.939	105.835	0.432723	0.579078	2.33145	0.370133
	0.317209	0.000286293	0.000187707	0.000533697	3.7389	0.000173928	3.39248	0.0610053	77.87	1.97895	154.101	0.000115184	78.4168	1.96515	2259.73	45.8861	106.385	1.69469	0.69036	5982	3.74439	212.373	136.335	0.439139	0.479174	2.22053	0.641964
	0.338098	0.00030623	0.000235654	0.000424173	4.23833	0.000179989	3.53639	0.0493836	71.5791	2.0629	147.66	0.000119198	72.2231	2.0445	2283.53	47.3236	109.086	1.34232	0.738764	6783.94	3.92375	235.47	111.73	0.443992	0.482308	2.3907	0.4745
	0.288673	0.000296755	8.27267e-05	0.000439736	4.90501	0.000187419	3.78225	0.0596146	66.1092	2.20631	145.858	0.000124119	66.9023	2.18016	2624.65	42.5326	102.05	2.5345	0.699656	6313.84	3.95178	203.428	92.6062	0.461406	0.552642	2.65458	0.455228
	0.335754	0.000269381	0.000208757	0.000557303	1.95888	0.000135521	3.62474	0.0480517	158.97	2.11443	336.13	8.97489e-05	159.278	2.11033	2348.86	47.6682	220.509	1.67962	0.656023	9220.77	4.2004	244.88	482.719	0.39862	0.426117	1.85801	1.97125
	0.308637	0.000311249	0.000182661	0.000382531	1.90686	0.00014982	3.60178	0.0462012	162.275	2.10104	340.946	9.92186e-05	162.574	2.09718	2429.27	47.9718	235.931	1.46649	0.69199	10028.1	4.80324	246.437	516.456	0.406689	0.405168	2.04125	2.09569
	0.325691	0.00028961	0.000238752	0.000516942	5.21988	0.0001462	3.29812	0.0488204	54.1523	1.92391	104.184	9.68209e-05	54.8864	1.89817	2169.59	47.3417	66.8647	1.49899	0.641795	2632.91	2.49526	219.772	61.4873	0.398139	0.384599	1.80291	0.279778
	0.307019	0.000299691	0.00029709	0.000472189	0.894264	0.000179292	3.30363	0.034698	317.471	1.92712	611.803	0.000118736	317.6	1.92633	2233.39	47.9906	444.043	1.29217	0.725794	25772	7.88576	226.215	2336.42	0.440911	0.462548	2.2438	10.3283
	0.332171	0.000288459	5.97443e-05	0.000445441	1.82351	0.000141125	3.87586	0.0613729	182.611	2.26092	412.87	9.34603e-05	182.919	2.25712	2525.14	42.8277	256.82	3.18622	0.622037	10397.4	4.72052	211.367	607.799	0.406714	0.443215	2.06943	2.87557
	0.351258	0.000248482	0.000163995	0.000416798	1.2086	0.000123061	3.40604	0.0523487	242.168	1.98685	481.153	8.14973e-05	242.348	1.98538	2155.63	48.6643	297.843	1.59628	0.619019	10961.8	4.43287	239.821	1140.92	0.381492	0.394647	1.58729	4.75737
	0.333228	0.000333337	0.0001407	0.000459383	4.51462	0.000122996	4.09846	0.0465281	77.8597	2.39077	186.145	8.1454e-05	78.6531	2.36665	2665.94	46.827	121.024	1.87364	0.65016	3666.94	2.8242	267.197	95.4277	0.371438	0.350493	1.89111	0.357144
	0.324628	0.000261938	0.000119382	0.000464464	4.27159	0.000161152	4.22311	0.0505275	84.8108	2.46348	208.93	0.000106723	85.5856	2.44118	2782.45	45.4291	153.201	1.98365	0.733267	10029.1	4.16329	259.13	132.855	0.449081	0.602802	2.55579	0.512696
	0.300752	0.000239727	0.000176193	0.000373698	3.51359	0.000190267	3.49202	0.0520053	85.3089	2.03701	173.775	0.000126005	85.8386	2.02444	2382.1	46.8498	130.03	1.45972	0.748263	10740.8	4.52853	227.882	173.341	0.478857	0.644899	2.50243	0.760661
	0.325604	0.000286162	0.00022098	0.000371509	1.74532	0.000152798	3.31427	0.0415789	163.152	1.93333	315.427	0.000101191	163.404	1.93035	2180.5	48.8385	215.303	1.29661	0.682575	9948.88	4.67965	235.034	573.134	0.410842	0.413696	1.91622	2.43851
	0.330548	0.000296593	0.000174294	0.000482165	2.35017	0.000169074	3.3354	0.0763333	121.904	1.94565	237.182	0.000111969	122.244	1.94023	2178.31	46.2977	161.852	1.66368	0.682395	8469.93	4.48958	212.562	332.274	0.429364	0.443923	2.13119	1.56319
	0.31558	0.000247927	0.000177643	0.000490078	1.67151	0.000157141	3.17789	0.0231001	163.351	1.85377	302.815	0.000104067	163.582	1.85115	2121.84	46.8192	196.779	1.68617	0.649832	10056.6	4.60098	207.112	620.131	0.425203	0.470919	1.88983	2.99418
	0.330222	0.000353291	0.000189508	0.000364214	0.30129	0.000141583	3.61789	0.0592402	1032	2.11044	2177.98	9.37633e-05	1032.05	2.11034	2363.95	48.2933	1479.56	1.44759	0.679328	51831.7	11.367	250.869	19744.4	0.386149	0.339445	1.94113	78.7041
	0.306373	0.000271273	0.000132244	0.000444587	3.25781	0.000140905	3.50533	0.0655887	92.3736	2.04478	188.883	9.33143e-05	92.8673	2.03391	2371.96	46.5339	121.088	1.8451	0.641074	4880.81	3.23629	225.676	170.183	0.402499	0.424022	1.86186	0.754104
	0.317656	0.000290189	0.000178752	0.000406373	2.80446	0.000116451	3.31593	0.0117097	101.537	1.9343	196.402	7.71201e-05	101.94	1.92665	2207.3	48.9705	117.237	1.51189	0.596925	3061.79	2.63178	236.425	192.938	0.357267	0.310316	1.4576	0.816063
	0.340784	0.000294129	0.000139587	0.000466283	4.43705	0.000109055	4.24401	0.0139056	82.0402	2.47567	203.105	7.2222e-05	82.8481	2.45153	2729.33	47.8087	129.206	1.84622	0.636152	3732.37	2.58737	288.409	99.4944	0.361192	0.364825	1.73691	0.344977
	0.320287	0.000300314	0.000254497	0.00047705	2.31148	0.000168425	3.63179	0.0722581	134.961	2.11854	285.921	0.000111539	135.326	2.11283	2408.23	47.8103	209.852	1.38427	0.733953	11921.4	5.09253	246.82	378.793	0.434832	0.475591	2.31187	1.5347
	0.339581	0.000326024	0.000176589	0.000439318	4.74058	0.000153667	3.72755	0.0322144	67.4239	2.1744	146.607	0.000101766	68.1803	2.15028	2401.57	46.7204	101.323	1.59687	0.691124	4479.68	3.22855	241.91	86.6334	0.408976	0.406786	2.14668	0.358122
	0.347077	0.000279332	0.000153437	0.000488372	2.19251	0.000151577	3.4792	0.0683474	136.313	2.02953	276.652	0.000100382	136.645	2.02461	2216.12	46.4948	183.374	1.78443	0.662831	8802.37	4.28423	223.617	384.98	0.415008	0.440954	1.99373	1.7216
	0.326515	0.000309183	0.000235157	0.000477625	5.34794	0.00014899	3.53336	0.0422516	56.6176	2.06113	116.696	9.8669e-05	57.4225	2.03224	2321.5	47.5749	78.6162	1.42979	0.673683	3241.85	2.75731	237.772	63.3581	0.402072	0.393057	1.96709	0.266466
	0.277342	0.000352427	5.53246e-05	0.000426154	3.78566	0.000184502	3.47535	0.0442788	78.784	2.02729	159.718	0.000122187	79.351	2.0128	2450.1	39.8405	99.7908	3.78968	0.624794	4309.14	3.84696	164.008	135.234	0.435938	0.422934	2.41265	0.824556
	0.347264	0.000246757	0.000233571	0.000432843	4.1869	0.000154264	3.75982	0.062264	77.0398	2.19323	168.966	0.000102162	77.7164	2.17414	2394.18	48.1864	121.342	1.40529	0.718145	7555.06	3.54685	259.558	119.139	0.43452	0.545535	2.17894	0.45901
	0.359497	0.000181174	0.000148714	0.000461959	1.20472	0.000174526	3.4927	0.0447269	249.129	2.03741	507.578	0.00011558	249.312	2.03591	2182.4	46.0318	358.412	1.88404	0.706122	35749.7	6.89641	220.037	1501.24	0.486384	0.78716	2.30841	6.82267
	0.336854	0.000249479	0.000255217	0.000483488	4.78919	0.000176944	4.0128	0.049485	71.8433	2.3408	168.171	0.000117182	72.6656	2.31431	2596.02	47.1238	130.506	1.45775	0.776034	10806.1	4.21913	264.939	104.962	0.469813	0.658813	2.66042	0.396175
	0.311007	0.000251316	0.000135965	0.000504046	6.13243	0.000148057	2.96379	0.0198782	41.3776	1.72887	71.5366	9.80513e-05	42.1462	1.69734	1992.11	45.2222	41.7341	1.92701	0.583396	1615.6	1.9964	180.205	40.3836	0.402475	0.401346	1.63265	0.224098
	0.314845	0.000330562	0.000190542	0.000404857	3.52548	0.000155076	4.10709	0.0494001	99.9957	2.3958	239.57	0.0001027	100.621	2.38092	2745.21	47.6016	178.324	1.4798	0.744352	8653.83	4.32237	276.691	177.085	0.418766	0.448309	2.39874	0.640011
	0.330831	0.000277736	0.000255265	0.000603977	2.72118	0.000145604	4.14306	0.0292062	130.753	2.41678	316.001	9.64262e-05	131.241	2.40778	2704.64	47.5654	229.026	1.63134	0.724766	12095.9	4.59924	278.69	302.045	0.421414	0.506637	2.27762	1.0838
	0.295146	0.000293346	0.000140801	0.000497693	3.34785	0.000143323	3.75001	0.0115965	96.158	2.1875	210.346	9.4916e-05	96.7005	2.17523	2578.59	46.2383	139.752	1.89001	0.664392	5634.61	3.53645	238.371	173.454	0.405007	0.42656	2.02541	0.727665
	0.316068	0.00026751	0.00011411	0.000446906	3.35217	0.000154821	3.18891	0.0459404	81.6645	1.8602	151.912	0.00010253	82.1264	1.84973	2127.68	45.3086	94.7881	2.00746	0.623967	4199.42	3.14614	194.635	150.784	0.415094	0.429673	1.86051	0.7747
	0.331261	0.000238401	0.000173639	0.000415862	5.08821	0.000186504	3.09404	0.037304	52.1232	1.80486	94.075	0.000123512	52.7953	1.78188	2018.53	45.9926	64.1885	1.55868	0.682312	4597.89	3.1188	194.589	70.4241	0.461744	0.559497	2.15903	0.361911
	0.291633	0.000327489	0.000287824	0.000354211	4.33639	0.000147183	3.78524	0.0619323	74.8771	2.20806	165.333	9.74723e-05	75.5819	2.18747	2615.8	49.8773	120.413	1.1097	0.728307	4931.74	3.37106	279.974	103.29	0.401485	0.394587	2.09167	0.368927
	0.331174	0.00028604	0.000183097	0.000460138	4.14174	0.000108588	3.70048	0.0489112	76.6534	2.15861	165.465	7.19125e-05	77.3123	2.14021	2414.48	48.9228	100.426	1.58544	0.606935	2607.41	2.27131	263.329	97.3155	0.352853	0.3261	1.50984	0.369559
	0.361208	0.000258035	0.000106893	0.000450615	2.9629	0.000138188	3.78357	0.0731748	109.651	2.20708	242.008	9.15153e-05	110.136	2.19736	2357.83	45.9568	157.716	2.08015	0.651699	7454.19	3.62226	237.586	225.746	0.408993	0.472315	1.97271	0.950169
	0.355374	0.000229219	0.000148574	0.00042389	3.18282	0.00017348	3.91483	0.0883627	105.601	2.28365	241.156	0.000114887	106.14	2.27206	2461.91	46.4737	181.072	1.69603	0.75085	15721.5	4.87243	251.388	233.676	0.472288	0.69017	2.56071	0.92954
	0.308489	0.000202341	0.00017432	0.000449884	2.67334	0.000154267	3.79362	0.0268116	121.87	2.21295	269.693	0.000102163	122.31	2.20499	2559.2	47.3026	191.472	1.69207	0.709964	13733.5	4.45549	252.373	308.794	0.454092	0.674737	2.20989	1.22356
	0.301403	0.000219668	0.000112521	0.000500893	2.11456	0.000159692	4.02172	0.00618125	163.384	2.346	383.298	0.000105757	163.753	2.34071	2740.88	45.4902	274.336	2.11624	0.715724	19653	5.52073	247.438	530.474	0.460125	0.682972	2.42842	2.14387
	0.331321	0.000282785	0.000134555	0.00049445	0.918027	0.000157182	3.76875	0.0878694	352.791	2.19844	775.59	0.000104094	352.942	2.1975	2458.48	45.9309	538.784	1.92506	0.694676	28819.2	7.61521	236.388	2459.66	0.428798	0.490246	2.244	10.4052
	0.320144	0.000271811	0.000195696	0.000350165	4.09024	0.000161469	3.55568	0.0679121	74.5844	2.07414	154.699	0.000106933	75.21	2.05689	2358.26	48.124	110.411	1.3386	0.713713	6204.95	3.54132	244.829	117.197	0.431278	0.490425	2.15771	0.478687
	0.31847	0.000302338	0.000176581	0.00039591	3.1155	0.000174729	3.9663	0.0329962	109.306	2.31367	252.898	0.000115714	109.841	2.30241	2637.07	46.9564	193.832	1.51083	0.766442	12537.8	5.07748	260.011	235.278	0.449673	0.534065	2.6136	0.904878
	0.31509	0.000158503	0.000119019	0.000464799	2.44908	0.000172272	3.75602	0.0583403	131.727	2.19101	288.615	0.000114087	132.126	2.18439	2509.65	45.3564	206.653	2.13209	0.716015	22643.4	5.16899	229.733	403.633	0.503018	0.9529	2.44476	1.75697
	0.301039	0.000340375	0.000147701	0.00051469	1.5222	0.000160607	3.90492	0.0430099	220.42	2.27787	502.089	0.000106363	220.679	2.2752	2662.67	45.6512	356.563	1.9083	0.710159	16274.5	6.33002	241.954	908.715	0.420489	0.43089	2.37398	3.75573
	0.33384	0.000263347	0.000106307	0.000423595	5.16859	0.000169704	3.12801	0.0842809	51.8716	1.82467	94.6489	0.000112387	52.5613	1.80073	2032.82	44.3707	59.744	2.04286	0.631217	3138.12	2.73786	183.096	64.6392	0.432635	0.46575	1.98533	0.353034
	0.329313	0.000175219	0.000194729	0.000484577	2.99371	0.000167834	3.42105	0.0495283	98.1224	1.99561	195.814	0.000111149	98.5658	1.98663	2238.37	46.2753	134.649	1.83268	0.687639	11985.7	4.06494	217.809	233.31	0.477279	0.763761	2.16616	1.07117
	0.334316	0.000266	0.000251164	0.000385648	1.75994	0.000159847	3.98656	0.0494352	194.616	2.32549	452.578	0.000105859	194.921	2.32185	2588.92	49.2178	349.218	1.25444	0.771618	23330.1	6.2348	287.118	730.117	0.442436	0.56001	2.41118	2.54292
	0.292746	0.000273181	0.000175179	0.000515914	3.6525	0.000170871	4.11541	0.0466541	96.7048	2.40066	232.155	0.00011316	97.3531	2.38467	2839.49	46.1858	176.135	1.72399	0.758696	11816.2	4.73328	261.004	180.276	0.456742	0.598666	2.64721	0.690701
	0.353905	0.000176407	0.000194671	0.000441911	4.66663	0.000137798	3.5462	1e-05	65.1646	2.06862	134.8	9.12571e-05	65.8733	2.04636	2235.18	47.5818	87.6509	1.70562	0.650227	5707.46	2.69273	238.705	90.1905	0.433628	0.641577	1.83197	0.377832
	0.290023	0.000261303	0.000110063	0.000401908	3.83635	0.000163555	3.94927	0.0221306	88.341	2.30374	203.515	0.000108315	88.9938	2.28684	2735.35	45.4521	145.583	1.9561	0.715345	8788.84	4.11899	242.573	153.425	0.446996	0.574506	2.42992	0.632489
	0.319665	0.000265666	0.000304778	0.000467454	5.05134	0.000140831	3.97735	0.0824257	67.4953	2.32012	156.597	9.32654e-05	68.3532	2.291	2639.79	48.9744	112.105	1.31561	0.715883	5530.44	3.1123	283.628	82.1467	0.412908	0.487445	2.09612	0.289628
	0.364791	0.000285286	0.000217232	0.000481584	2.30053	0.000174831	3.45421	0.0490971	128.974	2.01495	259.876	0.000115782	129.319	2.00958	2140.51	47.0016	186.317	1.50068	0.716945	12012.6	4.98099	226.877	370.66	0.443137	0.49429	2.28252	1.63374
	0.277488	0.000336318	0.00010791	0.000566377	4.00572	0.0001634	3.77369	0.0678779	80.8335	2.20132	177.94	0.000108212	81.484	2.18374	2659.89	43.5799	119.206	2.40035	0.669923	5017.66	3.72368	213.087	126.556	0.420808	0.425836	2.31817	0.593919
	0.310774	0.000256407	0.000247893	0.000413708	3.1735	0.00014768	3.5435	0.0479558	95.8657	2.06704	198.159	9.7801e-05	96.3521	2.05661	2382.57	48.9338	137.521	1.32391	0.693996	6895.57	3.61473	252.272	188.163	0.417693	0.475424	1.97317	0.745875
	0.302067	0.000379004	0.000116268	0.000390942	2.82656	0.000124418	4.19406	0.0499262	127.42	2.44653	311.737	8.2396e-05	127.934	2.43671	2855.62	45.9088	202.787	2.14562	0.650505	5365.23	3.69806	262.811	246.709	0.366912	0.321057	1.96961	0.938733
	0.32829	0.000196076	0.000164384	0.0004329	4.30192	0.000192849	2.80385	0.0612834	55.9099	1.63558	91.445	0.000127714	56.4279	1.62056	1837.33	45.4811	59.8334	1.70031	0.65431	5006.68	3.11358	172.438	92.8698	0.479587	0.639731	2.03037	0.538568
	0.361658	0.00037011	0.000128492	0.000473195	4.16943	0.000132533	3.71858	0.0304757	76.515	2.16917	165.974	8.77705e-05	77.1815	2.15044	2315.7	45.4705	103.683	2.07947	0.624695	3032.17	2.81677	228.589	101.341	0.370582	0.309073	1.85159	0.443331
	0.334579	0.000215149	0.000142137	0.000471145	3.2782	0.000154523	4.29234	0.0430631	112.408	2.50387	281.456	0.000102333	113.017	2.49039	2786.4	46.612	209.435	1.85176	0.744113	16364.7	4.66754	277.273	235.07	0.459738	0.717892	2.50007	0.847792
	0.32271	0.000287053	0.000168156	0.000416301	2.53018	0.000224778	3.39175	0.0630492	115.134	1.97852	227.795	0.00014886	115.506	1.97214	2241.04	45.2767	176.716	1.57866	0.775768	16586.1	6.23681	206.724	339.336	0.499877	0.619825	2.87994	1.6415
	0.34846	0.000256129	0.000233254	0.000471827	3.2589	0.000199537	3.38091	0.0311232	89.0652	1.9722	175.654	0.000132144	89.5415	1.96171	2148.95	46.4574	131.387	1.47011	0.747989	11530.8	4.77388	216.951	196.033	0.481021	0.613391	2.54302	0.903583
	0.301693	0.00034005	0.000253732	0.00046018	3.74857	0.000149807	3.79741	0.075346	86.9392	2.21515	192.584	9.92101e-05	87.5528	2.19963	2586.93	48.3237	137.478	1.34673	0.71386	5564.85	3.66624	263.649	139.236	0.402739	0.388937	2.14079	0.528111
	0.298221	0.000233737	0.000239104	0.00055013	0.56429	0.000168132	3.77575	0.0613348	575.044	2.20252	1266.55	0.000111346	575.137	2.20216	2584.97	46.9337	930.825	1.66559	0.734932	67265.9	10.7067	247.281	7011.7	0.460937	0.635789	2.40543	28.3552
	0.297673	0.000203053	0.00018928	0.000419853	2.20965	0.000167962	3.35104	0.0724483	130.273	1.95477	254.655	0.000111233	130.595	1.94996	2295.99	47.3025	177.405	1.57023	0.696649	13102.8	4.66944	222.929	406.532	0.462146	0.647389	2.12779	1.8236
	0.31447	0.000170309	0.000250041	0.000478281	1.05664	0.000133564	3.99147	0.0271027	324.618	2.32836	755.826	8.84528e-05	324.802	2.32704	2669.38	48.293	523.676	1.74472	0.692853	36467.4	6.37957	276.769	2029.04	0.442482	0.732474	2.01922	7.33116
	0.334336	0.000226716	0.000184061	0.000499269	3.13816	0.000166559	3.75521	0.0468422	102.74	2.19054	225.055	0.000110304	103.25	2.17972	2438.6	46.5583	162.474	1.71696	0.721928	12238.2	4.4313	242.017	224.575	0.459976	0.642726	2.35864	0.927931
	0.333818	0.000343595	0.000241773	0.000497936	3.21191	0.000147658	3.34659	0.0447496	89.4535	1.95218	174.629	9.77868e-05	89.9183	1.94209	2174.94	47.8111	115.059	1.43517	0.658875	4107.99	3.30589	227.446	161.728	0.389412	0.33498	1.86302	0.711061
	0.323956	0.000198377	0.000109303	0.000474741	1.24244	0.00014695	4.09237	0.0900856	283.039	2.38721	675.676	9.73178e-05	283.261	2.38535	2698.99	46.1855	475.462	2.10403	0.703684	34197.4	6.68804	259.54	1538.19	0.452383	0.709199	2.27726	5.92659
	0.325626	0.000322392	0.00013094	0.000446882	1.62484	0.000157001	3.5327	0.0279543	186.807	2.06074	384.961	0.000103974	187.057	2.05799	2324.12	45.6376	256.994	1.92414	0.667585	11089.6	5.25333	218.761	706.747	0.411908	0.402254	2.09912	3.23068
	0.336425	0.00029242	0.000118851	0.00043865	3.78687	0.000203131	4.21995	0.0621175	95.6331	2.46164	235.414	0.000134524	96.3217	2.44404	2731.81	44.2306	188.803	1.98023	0.802004	17485	5.82574	245.455	185.813	0.493611	0.681421	3.22534	0.757017
	0.307465	0.000257052	0.00028901	0.000493992	2.35131	0.000171604	4.06419	0.0710471	148.469	2.37078	351.986	0.000113645	148.883	2.36417	2745.79	47.9607	276.71	1.40559	0.78614	21001.8	5.95815	277.947	436.237	0.463067	0.633468	2.63571	1.5695
	0.299783	0.000292712	0.000200886	0.000511327	2.57859	0.000131758	3.28146	0.0719546	109.296	1.91419	209.214	8.72568e-05	109.664	1.90778	2241.57	47.8586	129.186	1.60198	0.617481	4040.3	3.12575	223.463	239.447	0.378687	0.344669	1.63304	1.07153
	0.315925	0.000348945	0.000168485	0.000545232	3.836	0.000178617	3.53389	0.0641322	79.0566	2.06143	162.97	0.00011829	79.6406	2.04632	2358.35	45.0199	114.149	1.81679	0.700429	5661.44	3.98318	212.951	132.454	0.431179	0.420416	2.37459	0.621994
	0.300817	0.000305847	0.000183865	0.000393353	2.66591	0.000158561	3.91641	0.075535	126.166	2.28457	288.236	0.000105007	126.619	2.2764	2671.35	47.6813	212.486	1.47477	0.737196	10963.7	4.82429	264.73	301.144	0.426572	0.473675	2.34497	1.13755
	0.33465	0.000280349	0.000200557	0.000459314	2.09323	0.000149932	2.9707	0.0580827	121.916	1.73291	211.269	9.92926e-05	122.186	1.72907	1928.24	47.5621	131.663	1.51811	0.623198	5283.25	3.59084	199.801	347.329	0.399662	0.371148	1.68422	1.73837
	0.344873	0.000258768	0.00022006	0.000375029	3.34268	0.000180356	3.36876	0.0457154	86.5157	1.96511	170.013	0.000119441	87.0023	1.95412	2153.02	47.813	124.188	1.31259	0.730464	8983.71	4.1951	228.971	175.978	0.45599	0.546651	2.28967	0.768562
	0.320574	0.000173094	0.000159601	0.000584337	3.55968	0.000105736	3.50562	0.0946052	84.5294	2.04494	172.858	7.0024e-05	85.0679	2.032	2323.58	47.1671	97.2551	2.23019	0.562631	3572.96	2.17646	231.878	134.977	0.381263	0.498201	1.39585	0.582103
	0.290585	0.000372783	0.000190529	0.000482411	3.75657	0.000139316	3.39156	0.0437321	77.4818	1.97841	153.291	9.22625e-05	78.031	1.96449	2347.21	46.9858	96.9662	1.62532	0.632563	2646.7	2.86341	222.613	114.613	0.372779	0.294669	1.77805	0.514854
	0.287453	0.000316258	0.000235459	0.000516033	4.29072	0.000131252	3.73046	0.0795094	74.582	2.1761	162.298	8.69218e-05	75.2694	2.15623	2593.15	48.2345	107.172	1.48742	0.660343	3426.06	2.83608	258.046	98.6026	0.380715	0.359168	1.83862	0.382113
	0.316385	0.000278678	0.000203986	0.000503059	1.19192	0.000161779	3.55856	0.0352897	256.553	2.07583	532.559	0.000107139	256.738	2.07433	2373.22	47.1591	374.409	1.58566	0.703036	20403.1	6.53382	235.301	1385.47	0.431256	0.483324	2.18018	5.8881
	0.344722	0.000254771	0.000177226	0.000427492	4.55357	0.000167125	3.76983	0.071419	71.0015	2.19907	156.137	0.000110679	71.7373	2.17651	2409.9	46.86	113.559	1.55775	0.727302	7782.16	3.71726	246.118	104.354	0.449274	0.573047	2.36317	0.423998
	0.33769	0.000186029	0.000207394	0.000432958	5.34858	0.000114618	3.51109	0.0361928	56.254	2.04814	115.216	7.59061e-05	57.0539	2.01942	2268.59	48.7534	69.5456	1.61218	0.603611	2920.95	1.99508	248.125	61.0347	0.389878	0.49939	1.50374	0.245984
	0.316626	0.000279832	0.000139396	0.000371252	3.38407	0.000175044	3.35167	0.0763272	85.022	1.95514	166.23	0.000115923	85.512	1.94394	2234.46	46.0481	114.907	1.66708	0.691254	6649.22	3.91644	211.302	165.492	0.441767	0.488057	2.21066	0.783204
	0.316948	0.000326412	0.000181295	0.000396438	2.52253	0.000153758	3.83911	0.0448834	130.716	2.23948	292.735	0.000101827	131.136	2.23231	2558.21	47.5775	209.983	1.50749	0.717313	9565.12	4.65052	258.375	319.315	0.413058	0.422051	2.22989	1.23586
	0.335915	0.000314858	0.00017574	0.000462301	2.77782	0.000143596	3.30263	0.0663329	102.101	1.92653	196.7	9.50969e-05	102.498	1.91906	2139.61	47.1538	125.3	1.62995	0.637007	4519.62	3.35497	218.329	213.822	0.390007	0.351282	1.79029	0.979359
	0.345071	0.000150783	0.000193796	0.000481284	6.42622	0.000164603	3.29228	0.0232108	43.8459	1.9205	84.2059	0.000109009	44.7381	1.8822	2103.5	45.2006	54.5193	1.98497	0.647452	5060.9	2.53679	199.988	48.6422	0.479589	0.824688	2.01278	0.243226
	0.319977	0.000327612	0.000184184	0.000455552	2.73013	0.000150692	4.26326	0.0823121	134.105	2.4869	333.505	9.97961e-05	134.609	2.47758	2828.25	47.4161	248.656	1.58462	0.745584	12036.7	4.95977	284.978	305.654	0.417159	0.457402	2.42555	1.07255
	0.292777	0.000265124	0.000114449	0.000558407	1.85206	0.000123756	3.56593	0.0456092	165.417	2.08013	344.088	8.19579e-05	165.704	2.07652	2460.26	46.0817	206.853	2.21137	0.601163	6549.25	3.7151	225.138	507.713	0.380932	0.38904	1.66954	2.25512
	0.336753	0.000261549	0.0002111	0.000539098	4.71104	0.00014113	3.75955	0.0606991	68.4309	2.19307	150.074	9.34638e-05	69.1892	2.16903	2432.56	47.2367	100.934	1.65008	0.672564	4765.37	2.95945	249.409	88.7732	0.410326	0.469756	1.98874	0.355934
	0.300319	0.000247381	0.000138425	0.000376575	3.6247	0.000162352	4.45613	0.0368082	105.516	2.59941	274.28	0.000107518	106.213	2.58236	3041.66	47.0043	214.823	1.65468	0.783225	16007.2	4.96672	292.719	200.253	0.461438	0.680217	2.72374	0.684113
	0.361262	0.000228671	0.00015859	0.00044244	5.00968	0.000152443	4.04164	0.0185084	69.1597	2.35763	163.053	0.000100955	70.0245	2.32851	2518.45	46.8734	117.181	1.68837	0.71867	8155.14	3.44434	264.015	91.2958	0.44414	0.623035	2.30609	0.345798
	0.272113	0.000228625	0.00015099	0.000501422	1.77827	0.000162617	3.96122	0.0293896	191.384	2.31071	442.235	0.000107694	191.691	2.30702	2812.84	46.3315	322.961	1.85369	0.730293	22223.7	6.09976	252.814	737.802	0.45938	0.658618	2.43731	2.91836
	0.336159	0.000245388	0.000278197	0.000477276	4.6427	0.000155324	3.09748	0.0284707	57.2137	1.80686	103.377	0.000102864	57.8297	1.78762	2005.97	47.746	66.9315	1.41353	0.647449	3396.56	2.65232	209.942	77.0007	0.419489	0.45415	1.80387	0.366771
	0.304206	0.000249828	0.000225631	0.000459318	4.53898	0.000148677	3.86402	0.00325012	73.0104	2.25401	164.566	9.84619e-05	73.7623	2.23103	2622.84	47.9678	116.998	1.47289	0.710946	6394.98	3.35664	264.336	102.444	0.427536	0.532904	2.15498	0.387553
	0.340388	0.000312853	0.00020047	0.000452024	3.52752	0.000144421	4.05454	0.0187902	98.6589	2.36515	233.343	9.56432e-05	99.2762	2.35044	2609.05	47.9203	167.655	1.50272	0.718491	7696.54	3.9031	276.821	169.938	0.407546	0.435491	2.20532	0.613893
	0.345214	0.000158189	0.000120311	0.0004056	3.77554	0.000148793	3.89065	0.0864849	88.4357	2.26955	200.709	9.85383e-05	89.0688	2.25342	2485.27	46.6616	139.556	1.93943	0.695316	12636.5	3.66883	251.86	164.105	0.470009	0.850719	2.17829	0.651574
	0.32328	0.000262329	0.000105502	0.000422297	4.1803	0.00017158	4.18999	0.0518645	85.9901	2.44416	210.174	0.000113629	86.743	2.42295	2766.14	44.8872	156.537	2.04815	0.744799	11357	4.4807	251.001	141.8	0.462604	0.636068	2.70086	0.564938
	0.315654	0.000318481	0.000293819	0.000415142	3.26222	0.000154619	3.94236	0.0636863	103.75	2.29971	238.594	0.000102397	104.306	2.28745	2631.98	49.3279	180.124	1.19372	0.754939	8998.11	4.33132	285.206	198.245	0.418024	0.445729	2.29777	0.695095
	0.321299	0.000243474	0.000131131	0.000487317	1.92177	0.00015021	3.82119	0.0522834	170.824	2.22903	380.772	9.94766e-05	171.143	2.22487	2530.05	46.2986	262.268	1.92912	0.68878	14940.3	5.0774	243.53	574.078	0.432801	0.550921	2.17117	2.35732
	0.35394	0.000323278	0.000206055	0.000543378	4.09454	0.000149179	3.35836	0.0778456	70.3713	1.95904	137.86	9.87939e-05	70.9627	1.94271	2116.66	46.7483	89.2842	1.62486	0.647643	3476.7	2.94215	218.211	101.389	0.39586	0.359814	1.88282	0.464635
	0.351852	0.000324207	0.000149677	0.000468374	1.76084	0.00016257	4.5455	0.0332317	221.788	2.65154	588.081	0.000107662	222.137	2.64738	2874.14	46.2466	459.153	1.80536	0.780766	28644.8	7.27095	289.041	827.574	0.440278	0.532812	2.79608	2.86317
	0.305515	0.000270137	0.000127807	0.000424637	2.30336	0.000142615	3.80594	0.0617168	141.932	2.22013	315.107	9.44471e-05	142.312	2.21419	2578.56	46.7247	212.915	1.84279	0.675692	9664.46	4.3435	247.044	379.274	0.412546	0.469176	2.05151	1.53525
	0.306174	0.000204278	0.000140579	0.000453156	3.39872	0.000162667	3.99728	0.0612938	100.961	2.33175	235.415	0.000107727	101.548	2.31827	2705.63	46.3659	172.495	1.83572	0.732727	13964.9	4.45922	255.493	208.075	0.469781	0.740936	2.44995	0.814405
	0.331058	0.000229127	7.43861e-05	0.00040359	1.80306	0.00015833	4.59692	0.0459917	219.042	2.68154	587.37	0.000104854	219.403	2.67713	2999.91	44.7079	439.97	2.42083	0.749051	34890.7	6.93179	273.182	846.193	0.466764	0.742497	2.75375	3.09754
	0.310702	0.000236185	0.000172795	0.000402992	1.03151	0.000162397	4.2576	0.049057	354.699	2.4836	880.929	0.000107548	354.89	2.48226	2863.01	47.8628	688.911	1.53655	0.782028	53772.4	8.89674	289.987	2376.23	0.462967	0.685035	2.61889	8.19428
	0.34602	0.000289417	0.000182451	0.000458664	2.66121	0.000169294	3.51056	0.0307486	113.292	2.04783	232.002	0.000112115	113.697	2.04053	2239.71	46.7149	163.927	1.58553	0.706576	9567.09	4.52416	227.775	276.895	0.436025	0.47907	2.24428	1.21565
	0.322576	0.000328153	0.000203719	0.00053492	3.35585	0.000148479	3.7701	0.0702749	96.4423	2.19923	212.098	9.83302e-05	96.9889	2.18683	2491.53	47.0614	146.37	1.62045	0.690106	6027.77	3.7494	248.257	172.91	0.403511	0.397138	2.10946	0.696497
	0.300138	0.000318959	0.000245701	0.000577834	3.30007	0.00017036	3.63908	0.0533719	94.6677	2.1228	200.96	0.000112821	95.1867	2.11122	2484.6	46.6544	144.699	1.55489	0.720037	7478.1	4.27731	235.503	184.645	0.431661	0.45259	2.33665	0.784046
	0.375362	0.000299355	0.000164412	0.000496778	4.2872	0.000124146	3.80709	0.0681944	76.1765	2.2208	169.173	8.22162e-05	76.8776	2.20055	2319.92	47.4311	107.929	1.74013	0.63798	3733.32	2.692	254.646	99.5148	0.375885	0.366284	1.77483	0.390797
	0.333498	0.000254684	0.000151736	0.000431852	3.28826	0.000163801	3.63636	0.0260756	94.9374	2.12121	201.382	0.000108477	95.4543	2.10972	2364.39	46.5528	141.824	1.68705	0.704251	8885.42	4.07157	234.301	190.59	0.442698	0.544602	2.24509	0.813438
	0.34124	0.000321394	0.000172106	0.000422737	4.86614	0.000175174	4.42414	0.0760786	77.9493	2.58075	201.168	0.000116009	78.8699	2.55062	2843.2	46.2903	160.183	1.59137	0.796268	10993	4.62753	281.855	108.073	0.453042	0.557979	2.90274	0.383435
	0.335314	0.000234837	0.000215178	0.00043937	1.23076	0.000149038	4.24232	0.0497626	296.196	2.47469	732.992	9.87007e-05	296.423	2.47279	2750.88	48.5997	556.527	1.48116	0.759254	38589.8	7.33857	297.912	1593.61	0.443654	0.629878	2.39429	5.34927
	0.311021	0.00023405	0.000190259	0.000421528	2.94545	0.000150775	3.79413	0.0850483	110.609	2.21324	244.805	9.98509e-05	111.093	2.2036	2550.18	48.0285	174.406	1.51559	0.712429	10513.1	4.15605	260.213	244.133	0.435886	0.569762	2.15851	0.938205
	0.369591	0.000244597	0.000228369	0.000440641	4.77941	0.000159771	3.75635	0.0240346	67.3902	2.1912	147.666	0.000105809	68.1584	2.1665	2310.15	47.7143	106.676	1.43628	0.722419	7324.24	3.44431	254.262	92.8873	0.442329	0.567995	2.24879	0.365322
	0.325368	0.000285415	0.000197399	0.000530664	5.19141	0.000130334	3.72811	0.0329202	61.5498	2.17473	133.854	8.63142e-05	62.3753	2.14595	2453.62	47.401	86.3517	1.65258	0.645117	3102.81	2.52794	249.047	68.1997	0.386398	0.393316	1.81707	0.273843
	0.345555	0.000228472	0.000180465	0.000392574	5.37314	0.000152949	3.84892	0.0542211	61.3831	2.2452	137.818	0.000101291	62.2638	2.21345	2457.33	47.6391	98.3077	1.49214	0.713318	6487.98	3.16528	259.707	74.8548	0.440227	0.594733	2.19942	0.288228
	0.347114	0.000129591	0.000169185	0.000483645	4.10741	0.000165181	3.63531	0.0519981	75.9351	2.1206	161.028	0.000109391	76.5772	2.10282	2315.43	45.1505	110.27	2.24902	0.684785	13584.9	3.62042	220.335	139.98	0.508089	1.07578	2.25659	0.635306
	0.325028	0.000280139	0.000184244	0.000486774	4.16683	0.000170556	4.21334	0.0272618	86.7496	2.45778	213.211	0.000112951	87.5043	2.43658	2774.37	46.5202	164.546	1.62905	0.77175	11542.7	4.56647	271.098	141.381	0.45572	0.595405	2.69985	0.521511
	0.329133	0.000244914	9.70693e-05	0.00043237	2.77852	0.000171924	3.0758	0.0765388	95.0643	1.79421	170.566	0.000113857	95.4347	1.78725	2013.01	44.4588	108.174	2.14424	0.634206	6250.09	3.73223	180.755	225.771	0.442393	0.503555	1.99625	1.24904
	0.33417	0.000302957	0.000155987	0.000485665	2.6001	0.000164267	3.71704	0.074882	122.779	2.16827	266.218	0.000108786	123.198	2.1609	2414.42	46.0629	188.014	1.77264	0.706244	10123.7	4.70129	234.486	303.266	0.43052	0.470263	2.30609	1.29332
	0.296776	0.00023658	3.98543e-05	0.000412672	4.46913	0.000167863	3.87834	0.06376	74.4311	2.26236	168.39	0.000111167	75.1746	2.23999	2660.67	40.6569	108.035	3.84022	0.641573	6695.01	3.64172	190.604	114.05	0.459672	0.637912	2.44282	0.598359
	0.312622	0.000341372	0.000199635	0.000530739	3.24847	0.000164489	4.09405	0.0625098	108.199	2.3882	258.4	0.000108933	108.774	2.37557	2745.37	46.5481	193.49	1.63235	0.748802	9957.92	4.77572	263.74	212.802	0.428448	0.459428	2.53862	0.806862
	0.339692	0.000293617	0.000216159	0.000467606	3.58924	0.000156352	3.40888	0.0410577	81.5182	1.98851	162.1	0.000103545	82.0462	1.97572	2195.89	47.4762	110.074	1.47545	0.679051	5248.68	3.42388	228.445	140.441	0.414774	0.422266	2.00688	0.614768
	0.367623	0.000267824	0.000256214	0.000374209	4.35068	0.000180514	3.24871	0.0778845	64.0518	1.89508	121.383	0.000119546	64.6586	1.8773	2004.19	48.0767	87.4232	1.22127	0.720225	6102.17	3.52287	223.253	98.4716	0.448927	0.507847	2.20159	0.441076
	0.268366	0.000296466	0.000172119	0.00035236	3.24622	0.000127416	3.78388	0.0601969	100.071	2.20726	220.883	8.43814e-05	100.602	2.19561	2700.74	48.869	146.925	1.45549	0.665172	4762.69	3.22361	268.671	175.514	0.381813	0.378742	1.81749	0.653267
	0.339485	0.000319044	0.000268142	0.000434602	2.69448	0.000213153	3.64565	0.0601021	116.197	2.12663	247.107	0.000141161	116.622	2.11886	2349.14	47.0617	201.123	1.27601	0.81391	17481.5	6.30947	240.065	310.976	0.483428	0.568176	2.93417	1.29538
	0.324587	0.000281536	0.000118711	0.000458684	5.56808	0.000181295	3.27434	0.02259	50.3804	1.91003	96.2281	0.000120063	51.1555	1.88109	2157.47	44.0738	63.7371	2.00041	0.662355	3650.15	3.02102	189.105	59.8928	0.444827	0.486185	2.21559	0.316718
	0.293221	0.000251631	0.000160651	0.000391087	4.31663	0.000166613	4.34357	0.0322602	86.3164	2.53375	218.704	0.00011034	87.1215	2.51034	2994.9	47.1234	171.525	1.56027	0.784276	12732.7	4.55453	286.774	137.903	0.462861	0.667137	2.71727	0.480878
	0.297381	0.000266477	0.000164109	0.000467788	2.80318	0.000197491	3.30741	0.0661708	101.322	1.92932	195.483	0.000130789	101.724	1.9217	2267.04	45.4663	140.905	1.68962	0.720805	10365.4	4.89307	203.276	255.022	0.473015	0.571627	2.46561	1.25456
	0.308244	0.000372446	0.000204756	0.000458157	3.22555	0.000152967	3.60395	0.0503284	95.9245	2.1023	201.662	0.000101302	96.4272	2.09134	2432.11	47.1528	138.406	1.52455	0.686325	5003.6	3.75617	238.238	175.536	0.395824	0.344745	2.07833	0.73681
	0.320187	0.000302226	0.000123053	0.000391073	2.66307	0.000122864	4.08287	0.0470729	131.669	2.38167	313.592	8.13667e-05	132.14	2.37317	2707.74	47.2733	206.001	1.87502	0.656907	6865.56	3.68069	271.278	279.925	0.37954	0.387223	1.89428	1.03187
	0.356889	0.000254674	0.000143216	0.000450751	4.49798	0.000174791	4.7297	0.0546036	90.1854	2.75899	248.821	0.000115756	91.0977	2.73136	2967.37	45.9767	203.416	1.77408	0.817521	19142	5.20335	297.254	143.636	0.480883	0.752406	3.10163	0.483208
	0.337275	0.000248758	0.000171188	0.000496823	2.81637	0.000135315	3.60912	0.067607	110.046	2.10532	231.683	8.96123e-05	110.487	2.09693	2333.39	47.4753	150.778	1.72517	0.650794	6737.8	3.46804	241.855	235.428	0.403948	0.457814	1.8434	0.973427
	0.324816	0.0003408	0.000202409	0.000465159	3.31506	0.000136596	3.41404	0.0196822	88.4111	1.99152	176.073	9.04606e-05	88.9002	1.98057	2248.76	47.7857	112.62	1.52431	0.63962	3487.74	3.02562	231.783	149.761	0.376591	0.318614	1.75759	0.646124
	0.325184	0.000238477	0.000136123	0.000464816	0.1	0.000168767	4.16996	0.0671648	3583.82	2.43248	8717.55	0.000111766	3583.83	2.43247	2745.17	46.2413	6646.66	1.85051	0.762446	536923	28.7185	265.1	251026	0.469219	0.690921	2.66703	946.91
	0.340663	0.000243088	0.000233176	0.000471599	0.7099	0.00016713	3.8354	0.0421328	464.307	2.23732	1038.8	0.000110682	464.426	2.23674	2467	47.7687	780.769	1.49127	0.751606	58978.9	9.74736	260.205	4465.4	0.457379	0.617229	2.42864	17.1611
	0.301726	0.000275269	0.000197056	0.00044504	3.65587	0.000133397	3.43974	0.0512554	80.7531	2.00652	162.032	8.83425e-05	81.2955	1.99313	2343.17	48.2509	103.743	1.50683	0.640263	3722.99	2.83594	238.098	128.01	0.388749	0.387672	1.72733	0.537638
	0.323635	0.000280718	0.0001875	0.000430154	4.23788	0.000170662	3.45496	0.0314955	69.9383	2.01539	140.953	0.000113021	70.5674	1.99743	2279.69	46.7765	99.0642	1.51475	0.702817	5709.99	3.54541	224.758	107.677	0.437879	0.487389	2.21462	0.479081
	0.30476	0.000226767	0.000251083	0.000384981	3.23618	0.000125566	3.21872	0.0591319	85.389	1.87758	160.325	8.31565e-05	85.8394	1.86773	2183.08	49.9974	99.8975	1.30042	0.623093	3765.75	2.61952	239.219	152.34	0.387178	0.415095	1.52363	0.636825
	0.297597	0.000284481	0.000147115	0.000443535	4.04282	0.000155409	3.52723	0.0732549	74.8587	2.05755	154.026	0.00010292	75.4722	2.04083	2416.98	46.2465	103.234	1.74642	0.670241	4739.83	3.29578	224.29	115.524	0.418636	0.447474	2.06051	0.515064
	0.288642	0.000212935	0.000216777	0.000393267	2.66242	0.000101398	3.8823	0.0546638	125.231	2.26467	283.608	6.71512e-05	125.68	2.2566	2694.2	50.9711	177.95	1.41458	0.627449	5617.42	2.82326	299.885	256.876	0.366103	0.431297	1.48654	0.856582
	0.298278	0.00029332	0.000175094	0.000337603	2.47643	0.000144703	3.83186	0.0210601	132.901	2.23525	297.067	9.58295e-05	133.313	2.22835	2623.17	48.5533	210.772	1.41309	0.709512	9384.36	4.38485	268.575	327.645	0.409237	0.441221	2.09484	1.21994
	0.325867	0.000271431	0.000164368	0.000340596	4.78033	0.000182881	3.70537	0.0973218	66.4627	2.16146	143.657	0.000121113	67.2206	2.13709	2436.85	46.7542	108.057	1.45309	0.752191	7917.59	3.96796	240.819	95.7104	0.462223	0.577925	2.53912	0.397437
	0.338763	0.000301545	0.000251693	0.000403755	4.85805	0.000175559	4.10219	0.0236692	72.3978	2.39295	173.244	0.000116264	73.2501	2.3651	2646.21	47.9802	137.838	1.26851	0.795629	9696.7	4.30209	280.775	100.419	0.452479	0.552663	2.69753	0.357651
	0.353679	0.000291987	0.0002613	0.000356436	4.97057	0.000159465	3.41654	0.0652038	58.9254	1.99298	117.437	0.000105606	59.651	1.96874	2154.2	48.895	82.796	1.16908	0.705023	4304.84	3.0286	242.847	73.8446	0.418327	0.43155	2.03961	0.304078
	0.331207	0.000276379	0.000161085	0.000528357	3.50837	0.000137636	3.32036	0.0888603	81.2365	1.93688	157.345	9.11497e-05	81.7394	1.92496	2166.35	46.6451	97.2184	1.81372	0.617867	3607.88	2.83255	214.791	135.288	0.391884	0.384758	1.72126	0.629858
	0.348346	0.000216361	0.000193238	0.000394394	6.16348	0.000136966	3.16682	0.0659129	43.9878	1.84731	81.2592	9.07058e-05	44.813	1.8133	2013.23	47.9261	49.9454	1.47126	0.614644	2300.27	2.02037	216.264	42.8921	0.404161	0.460723	1.61351	0.198332
	0.311991	0.000303147	0.000195825	0.000456021	4.22516	0.000157342	3.68584	0.0535942	74.8375	2.15008	160.906	0.0001042	75.5067	2.13102	2473.91	47.1306	113.006	1.52617	0.702312	5418.21	3.49114	243.422	110.7	0.419431	0.443932	2.17833	0.454763
	0.290823	0.000285924	0.000131525	0.000473861	1.17234	0.000154842	3.23577	0.0196903	237.179	1.88753	447.684	0.000102545	237.344	1.88622	2238.64	45.8136	285.245	1.91561	0.637157	11818.5	5.45845	201.922	1243.63	0.411846	0.409988	1.89746	6.15898
	0.367631	0.000193869	0.000173883	0.000480612	2.9957	0.000153362	3.56039	0.0516246	102.051	2.0769	211.949	0.000101564	102.513	2.06754	2196.45	46.8066	143.759	1.797	0.678272	10781.5	3.83801	231.915	228.977	0.450683	0.656451	2.05998	0.987329
	0.332872	0.000369608	0.000315823	0.00050148	1.08973	0.000121586	3.48871	0.0419373	275.111	2.03508	559.873	8.05207e-05	275.277	2.03385	2270.52	50.0558	358.639	1.26354	0.640572	8877.2	4.806	259.891	1326.25	0.351959	0.268536	1.60656	5.10311
	0.335417	0.000296906	0.000124656	0.000507225	1.45502	0.000156796	3.70112	0.0417602	218.567	2.15899	471.883	0.000103838	218.801	2.15667	2399.58	45.3813	320.466	2.04509	0.679122	15840.4	5.85863	226.624	947.089	0.422447	0.457129	2.1969	4.17912
	0.342671	0.000284711	0.000118329	0.000447331	4.79308	0.000137789	3.7125	0.0228002	66.4126	2.16562	143.825	9.12507e-05	67.174	2.14108	2380.68	45.8172	92.1078	1.98864	0.640417	3677.34	2.76015	231.708	82.0347	0.397538	0.415892	1.91663	0.354043
	0.344493	0.000221016	0.000163125	0.000375151	2.39561	0.000146712	4.33963	0.0626289	155.596	2.53145	393.883	9.71604e-05	156.047	2.52413	2775.12	48.4625	298.933	1.52614	0.758939	21981.3	5.29449	303.028	433.242	0.447101	0.672503	2.40586	1.42971
	0.326755	0.000285634	0.000240724	0.000421255	2.10423	0.000176736	3.49089	0.0514655	142.515	2.03635	290.211	0.000117044	142.834	2.0318	2292.77	47.8942	214.344	1.33068	0.738581	13717	5.40073	238.078	451.198	0.446475	0.504587	2.33291	1.89517
	0.278882	0.000214614	0.000202169	0.000426362	3.11309	0.000169567	3.3873	0.0377548	93.4219	1.97593	184.595	0.000112296	93.8781	1.96632	2382.94	47.3006	129.747	1.5241	0.702873	9053.32	4.03145	225.323	205.719	0.459671	0.623558	2.16615	0.912995
	0.31946	0.000291182	0.000253376	0.00039006	3.36511	0.000178474	3.20214	0.0268153	81.6874	1.86792	152.585	0.000118195	82.153	1.85733	2125.92	48.0414	108.61	1.24439	0.711802	6285.33	3.88224	219.73	158.729	0.438535	0.456919	2.15356	0.722384
	0.33583	0.000299106	8.91842e-05	0.000431997	1.55406	0.000149194	3.87238	0.0300933	214.1	2.25889	483.627	9.88043e-05	214.362	2.25612	2509.05	44.5204	321.469	2.39904	0.664705	14662.9	5.58333	228.199	853.639	0.41518	0.45168	2.18679	3.74077
	0.332131	0.000311317	0.000122624	0.000435612	2.81782	0.000168508	3.12076	0.0781904	95.1064	1.82044	173.136	0.000111595	95.4874	1.81318	2033.31	44.8729	110.513	1.96902	0.638302	4962.91	3.69742	186.83	210.762	0.418648	0.39391	1.98497	1.12809
	0.31028	0.000309996	0.000231277	0.000496949	1.47155	0.000152231	3.90008	0.0445179	227.729	2.27505	518.094	0.000100815	227.979	2.27256	2624.21	48.0121	376.513	1.47172	0.726727	18048.2	6.16545	267.296	963.157	0.417016	0.447921	2.24756	3.60333
	0.310906	0.000327275	0.000189128	0.000387225	1.49288	0.000167751	3.33919	0.051363	192.19	1.94786	374.36	0.000111093	192.407	1.94566	2244.77	47.284	260.244	1.45681	0.695171	12108.8	5.64842	221.966	806.555	0.419787	0.400276	2.12044	3.63369
	0.344043	0.000324287	0.00015924	0.000424225	2.75171	0.000150247	4.08062	0.0496431	127.351	2.38036	303.142	9.95013e-05	127.838	2.3713	2611.28	46.9746	218.734	1.67232	0.721557	10452.1	4.63805	267.714	285.623	0.413742	0.440963	2.31464	1.0669
	0.252122	0.000279922	0.00016626	0.00033134	2.55799	0.000150821	2.82231	0.0260965	94.7612	1.64635	156.01	9.98814e-05	95.0744	1.64092	2059.15	47.847	95.5638	1.43366	0.612549	3297.21	3.07737	192.102	219.212	0.396664	0.354856	1.60784	1.14112
	0.3384	0.000246288	0.000201647	0.000485897	3.42399	0.000165535	3.7567	0.0618557	94.1824	2.19141	206.392	0.000109626	94.7379	2.17856	2424.68	46.977	149.837	1.59713	0.725982	10402.7	4.22931	246.488	184.906	0.450853	0.587696	2.34288	0.750164
	0.302383	0.000213365	0.000180157	0.000432812	4.41232	9.78486e-05	3.61472	0.0495408	70.2687	2.10859	148.168	6.48004e-05	70.9531	2.08825	2460.05	49.7188	85.6946	1.60642	0.578362	2299.86	1.89061	265.664	83.8283	0.353312	0.384372	1.32748	0.315542
	0.314238	0.000315633	0.000164464	0.000395618	3.01352	0.000175816	3.79933	0.0528398	108.254	2.21628	239.922	0.000116434	108.75	2.20618	2541.75	46.4571	178.641	1.58629	0.744582	10561.8	4.90479	243.797	237.577	0.443443	0.493236	2.51994	0.974487
	0.274728	0.000343595	0.000142139	0.000419258	2.00748	0.000161112	3.43105	0.0536851	146.829	2.00144	293.869	0.000106696	147.128	1.99737	2427.61	45.7633	196.325	1.81876	0.668069	7569.35	4.71179	213.638	446.86	0.409442	0.375904	2.09063	2.09167
	0.332331	0.000332602	0.000171178	0.000582751	2.75628	0.000155513	3.89115	0.0361023	121.236	2.26984	275.186	0.000102989	121.701	2.26117	2534.49	45.9543	192.981	1.84756	0.701273	8827.64	4.50915	244.314	272.175	0.414837	0.424339	2.2845	1.11404
	0.320071	0.000304474	0.000150086	0.000507616	2.40952	0.000165959	3.92786	0.0155801	140.017	2.29125	320.815	0.000109907	140.428	2.28455	2605.38	45.7932	232.792	1.84793	0.725627	13109.1	5.28514	244.893	379.03	0.437201	0.499793	2.46316	1.54774
	0.310995	0.000359811	0.00018329	0.000492223	3.55221	0.000144362	3.96989	0.0774817	95.9261	2.31577	222.143	9.56043e-05	96.5347	2.30117	2668.41	46.9139	154.577	1.66554	0.695847	5656.5	3.74626	259.775	158.843	0.394539	0.370567	2.15821	0.611464
	0.324506	0.000226886	0.000113637	0.000474215	3.30116	0.000142997	3.95691	0.0213804	102.901	2.3082	237.517	9.47002e-05	103.466	2.2956	2607.53	46.095	161.425	2.04334	0.679638	9197.31	3.79215	249.966	200.102	0.430508	0.580706	2.13263	0.800517
	0.302591	0.000226854	0.000145861	0.000435837	3.73685	0.000149647	4.24774	0.0667883	97.5551	2.47785	241.727	9.91041e-05	98.2394	2.46059	2890	47.0921	177.762	1.73825	0.735382	11748.5	4.16446	280.073	173.708	0.446369	0.651479	2.39222	0.620223
	0.336927	0.000249597	0.000291282	0.000441279	4.43377	0.000170694	3.58972	0.0429686	69.4436	2.094	145.415	0.000113042	70.1265	2.07361	2322.06	48.0402	106.954	1.31243	0.735512	7537.12	3.68459	246.314	105.374	0.45159	0.569174	2.29952	0.427803
	0.329769	0.000163787	0.000100888	0.000506857	1.9204	0.000179175	2.62187	1e-05	117.293	1.52942	179.39	0.000118659	117.511	1.52657	1714.3	43.981	106.187	2.35903	0.591935	8444.7	3.85377	150.785	432.522	0.474565	0.670278	1.777	2.86847
	0.351064	0.000253728	7.02356e-05	0.000509662	3.66964	0.000150623	3.69318	0.0848634	86.3767	2.15436	186.086	9.97506e-05	86.9612	2.13988	2338.06	43.2581	117.607	2.81061	0.632003	6045.92	3.40942	205.472	149.437	0.425876	0.509861	2.09398	0.727288
	0.315904	0.000258704	0.000150174	0.000480743	1.88855	0.000148343	4.26903	0.0416773	194.203	2.49027	483.618	9.82406e-05	194.554	2.48578	2849.04	46.9929	355.15	1.79048	0.73436	20894.3	5.83506	280.293	666.669	0.434453	0.572094	2.39565	2.37847
	0.313464	0.000239341	0.000134212	0.000494788	6.41184	0.000116755	3.98164	0.0563132	53.1466	2.32263	123.44	7.73209e-05	54.2233	2.2765	2666.72	46.8266	76.6884	1.9253	0.621263	2697.34	2.13408	259.577	47.1365	0.382548	0.445723	1.72677	0.18159
	0.298026	0.000367218	0.000189724	0.000475864	2.59692	0.00014929	3.34159	0.0221317	110.513	1.94926	215.418	9.88674e-05	110.889	1.94264	2288.37	46.8465	139.856	1.6157	0.649232	4450.19	3.68504	218.034	245.432	0.386614	0.316985	1.88415	1.12566
	0.322417	0.00026286	0.000112032	0.000438193	3.42248	0.000148932	3.69071	0.0377268	92.5691	2.15292	199.294	9.86307e-05	93.1146	2.1403	2439.63	45.7129	132.366	2.00666	0.664175	6506.03	3.57642	229.301	169.627	0.420621	0.486719	2.07089	0.739757
	0.345176	0.000287054	0.000194809	0.000418606	4.19086	0.000150595	3.06799	0.0471195	62.8043	1.78966	112.398	9.97319e-05	63.3569	1.77405	1959.88	47.4975	71.0118	1.4659	0.631787	2903.92	2.64879	205.785	89.3069	0.399923	0.373554	1.73568	0.433982
	0.330719	0.000271786	0.000202467	0.000561227	1.81885	0.000177849	3.35811	0.0123947	158.623	1.9589	310.727	0.000117781	158.889	1.95562	2192.58	46.0406	217.12	1.70367	0.698748	13770.6	5.4698	211.639	584.321	0.448984	0.513627	2.25958	2.76094
	0.306249	0.000283126	0.000186348	0.000476651	2.74731	0.000108618	4.00099	0.0427435	125.066	2.33391	291.893	7.19328e-05	125.543	2.32505	2707.84	49.2081	185.755	1.60143	0.636379	5160.23	3.0899	288.043	244.487	0.360047	0.358011	1.6407	0.848784
	0.287066	0.000233875	0.000131488	0.000340893	3.57102	0.000135804	3.77084	0.0505703	90.6353	2.19966	199.367	8.99367e-05	91.2164	2.18565	2622.65	47.9752	134.1	1.61813	0.672629	6270.94	3.28246	258.042	156.205	0.412815	0.509389	1.92835	0.605347
	0.270993	0.000355122	0.000214969	0.000484136	3.87679	0.000148783	3.2835	0.0521393	72.6799	1.91537	139.209	9.85316e-05	73.2282	1.90103	2335.18	47.2096	89.9459	1.50763	0.64612	2779.85	2.94519	217.578	107.971	0.386395	0.319672	1.83753	0.49624
	0.306006	0.000308028	0.00022466	0.000435864	3.69306	0.000148341	4.04503	0.0448768	94.0042	2.3596	221.812	9.82388e-05	94.6483	2.34354	2738.61	48.3516	162.732	1.39305	0.73365	7649.86	3.94974	281.165	157.096	0.414008	0.452983	2.25852	0.558733
	0.362178	0.000272223	0.000259778	0.000509136	2.54473	0.000149058	3.51366	0.0606564	118.589	2.04963	243.065	9.87139e-05	118.977	2.04295	2186.31	48.1197	166.097	1.4591	0.683346	8450.81	4.00966	241.893	288.036	0.414315	0.44898	1.97836	1.19076
	0.349991	0.000238717	0.00016295	0.00046492	2.57239	0.000157586	3.88449	0.0284768	129.694	2.26595	293.88	0.000104362	130.127	2.25841	2463.23	46.947	211.811	1.70627	0.72074	14535.5	4.787	254.547	335.589	0.44619	0.598377	2.31213	1.31838
	0.314571	0.000213482	1.29593e-05	0.000453663	2.82845	0.000188839	3.37956	0.0153844	102.606	1.97141	202.279	0.000125059	103.02	1.96349	2259.83	34.9929	110.918	9.29918	0.548341	7505.94	4.15109	123.038	262.745	0.485586	0.697103	2.40886	2.13549
	0.339993	0.000250801	0.000153871	0.000448065	3.44406	0.000145846	3.24839	0.0616562	80.9634	1.8949	153.417	9.65868e-05	81.4466	1.88366	2091.55	46.906	97.065	1.70824	0.632686	4445.37	2.99914	212.493	143.553	0.409561	0.439649	1.78479	0.675565
	0.352499	0.000232882	0.000157295	0.000485722	2.9805	0.000148835	3.39839	0.0472112	97.9052	1.9824	194.087	9.85664e-05	98.3438	1.97356	2146.67	46.7111	126.446	1.78312	0.651492	6917.63	3.49325	220.461	207.743	0.424039	0.506243	1.9083	0.942314
	0.307475	0.000283025	0.00017084	0.000459759	4.60719	0.000167503	3.50502	0.0161805	65.2425	2.04459	133.394	0.000110929	65.9345	2.02314	2367.98	46.2097	92.3436	1.64056	0.692259	4962.01	3.35968	222.522	91.547	0.434	0.480577	2.20161	0.411406
	0.295325	0.000294381	0.00019024	0.000455818	2.3268	0.000141217	4.26499	0.0554852	157.447	2.48791	391.713	9.35211e-05	157.878	2.48112	2931.96	48.1403	287.247	1.54791	0.73331	13347.1	4.99558	293.869	416.754	0.412807	0.477709	2.27628	1.41816
	0.31949	0.000272595	0.000174053	0.000474226	4.19927	0.000147047	3.97014	0.0495394	81.1087	2.31592	187.841	9.73822e-05	81.8252	2.29564	2635.68	47.1339	132.378	1.65292	0.704733	6715.53	3.53131	262.235	121	0.420408	0.497028	2.19307	0.461416
	0.327764	0.000292435	0.000243451	0.000464859	4.82423	0.000147056	3.55717	0.0332007	63.2213	2.07502	131.185	9.73883e-05	63.9554	2.0512	2332.81	48.0443	89.0808	1.39541	0.679046	3873.68	2.89699	244.121	79.0407	0.404991	0.414002	1.95967	0.323776
	0.348973	0.00022946	0.000244347	0.000591312	3.76905	0.000134184	3.38799	0.0318606	77.1431	1.97633	152.46	8.88633e-05	77.6935	1.96233	2151.75	47.2484	95.1239	1.75802	0.623927	4282.93	2.73159	224.871	122.966	0.40304	0.460578	1.71066	0.546827
	0.329209	0.000173306	0.000225113	0.000488919	2.67403	0.000154376	3.0604	0.064994	98.2901	1.78523	175.471	0.000102236	98.645	1.77881	2002.7	46.7692	110.67	1.7955	0.630704	7631.33	3.38974	199.028	246.105	0.448844	0.635967	1.78403	1.23654
	0.32337	0.000321206	0.000147789	0.00048223	1.07003	0.00011145	3.54177	0.0576786	284.437	2.06603	587.657	7.38079e-05	284.602	2.06483	2337.89	47.8107	346.851	1.83736	0.590227	7936.22	4.33234	240.707	1379.22	0.347614	0.287555	1.49505	5.72985
	0.292415	0.000329636	0.000194567	0.000515182	2.92512	0.000168852	3.47021	0.0721144	101.87	2.02429	206.215	0.000111823	102.31	2.01559	2395.45	46.3022	143.347	1.62854	0.695134	6607.11	4.21961	221.196	219.787	0.423134	0.414394	2.21107	0.993627
	0.340704	0.000321241	0.000176118	0.000494166	2.99668	0.000189031	3.40659	0.0433431	97.6106	1.98718	193.97	0.000125186	98.0526	1.97822	2191.05	45.4909	138.859	1.68116	0.71588	8516.34	4.64934	209.598	217.789	0.44831	0.467214	2.42941	1.03908
	0.327464	0.000237051	0.000258283	0.000460839	3.19513	0.00016471	3.58901	0.0207928	96.4382	2.09359	201.902	0.000109079	96.9341	2.08288	2354.74	47.8665	145.672	1.43092	0.721497	9977.3	4.14933	244.487	202.197	0.449229	0.580873	2.22882	0.827027
	0.324493	0.000295422	4.18759e-05	0.000491283	1.70628	0.000147644	3.66497	0.034289	184.546	2.1379	394.541	9.77775e-05	184.818	2.13475	2415.2	40.4372	230.498	4.35884	0.584217	8806.48	4.67865	178.176	660.893	0.409458	0.428214	2.04765	3.70921
	0.333436	0.000241271	0.000243632	0.000426482	4.08529	0.000154647	3.88969	0.030365	81.6902	2.26899	185.354	0.000102415	82.3737	2.25016	2529.35	48.4192	136.241	1.37898	0.735034	8882.77	3.76763	271.124	131.144	0.440088	0.578882	2.26073	0.483704
	0.341453	0.000274329	0.000255897	0.0004557	2.70139	0.000178103	3.62265	0.0834416	115.168	2.11321	243.374	0.000117949	115.592	2.10546	2327.37	47.6855	182.886	1.36659	0.751461	13034.2	5.02727	244.916	289.269	0.454865	0.548635	2.43618	1.1811
	0.287465	0.000198032	0.000142494	0.000520003	3.67481	0.000159751	3.45716	0.0523453	80.7425	2.01668	162.832	0.000105795	81.2904	2.00309	2403.13	45.5991	108.088	2.0078	0.663803	7196.62	3.46659	213.722	148.975	0.454826	0.648554	2.0789	0.697049
	0.325363	0.000306521	0.000134355	0.000462522	3.38007	0.000187494	3.52402	0.0564482	89.4999	2.05568	183.983	0.000124168	90.0145	2.04393	2319.32	44.7135	131.055	1.89518	0.712322	8214.89	4.48009	209.476	179.04	0.453482	0.501802	2.48969	0.854705
	0.330278	0.000297921	0.000121196	0.000415066	5.16058	0.000158139	3.84665	0.0176771	63.8883	2.24388	143.358	0.000104727	64.7352	2.21453	2513.21	45.2581	98.8072	1.92569	0.689235	4970.67	3.28098	234.258	78.27	0.42467	0.471798	2.27515	0.334119
	0.305892	0.000274025	0.00013168	0.000350353	4.1674	0.000143275	3.33166	0.0179559	68.5871	1.94347	133.297	9.48841e-05	69.184	1.9267	2256	46.9084	84.5423	1.67977	0.634241	3317.32	2.74966	217.961	98.1706	0.400289	0.404328	1.7934	0.450404
	0.301793	0.000276386	0.000156701	0.000423276	2.75714	0.000172698	3.42939	0.00172963	106.816	2.00048	213.683	0.00011437	107.226	1.99283	2335.89	46.343	149.501	1.64762	0.699639	8625.75	4.40738	218.979	255.615	0.442331	0.499781	2.23589	1.16731
	0.350519	0.000284611	0.00019791	0.000448188	5.00604	0.000156571	3.82816	0.0605453	65.5544	2.23309	146.389	0.000103689	66.373	2.20555	2425.54	47.223	104.541	1.50641	0.714132	5787.08	3.34138	253.813	83.1001	0.426191	0.486985	2.24347	0.327407
	0.329791	0.000257724	0.000156227	0.000383886	3.63726	0.000135593	3.53019	0.0417531	83.3018	2.05928	171.542	8.97968e-05	83.8557	2.04568	2308.13	47.9796	111.551	1.5696	0.650288	4697.74	2.98914	241.618	136.301	0.399212	0.431975	1.80205	0.564116
	0.334713	0.000224473	0.00021438	0.000484342	0.1	0.000159903	4.04423	0.0544308	3475.76	2.35914	8199.79	0.000105896	3475.78	2.35912	2624.81	47.649	6175.48	1.60238	0.753127	482279	26.2278	272.999	238398	0.459469	0.674498	2.45075	873.257
	0.313328	0.000276154	0.000137188	0.000425467	3.79339	0.000182518	3.03845	0.027881	68.739	1.77243	121.835	0.000120873	69.2357	1.75972	2035.42	45.1883	80.2943	1.77683	0.65904	4518.83	3.41365	184.469	119.708	0.443185	0.466806	2.08661	0.648933
	0.322452	0.000263368	0.000287805	0.000451033	4.39821	0.000126181	3.94401	0.0801839	76.917	2.30067	176.961	8.35634e-05	77.6614	2.27862	2606.94	49.7414	121.462	1.31382	0.686376	4936.46	2.90258	290.129	101.992	0.391449	0.438168	1.86791	0.351538
	0.301364	0.000263948	0.00019145	0.000487322	3.63625	0.000145207	3.71661	0.0705715	87.725	2.16802	190.19	9.61635e-05	88.308	2.15371	2533.08	47.4477	129.867	1.61248	0.682831	6116.71	3.45389	248.768	149.403	0.41541	0.475549	2.03173	0.600574
	0.336917	0.000302436	5.98112e-05	0.000381734	2.79303	0.000171295	3.64707	0.039462	112.134	2.12746	238.561	0.000113441	112.576	2.11911	2359.19	41.7428	154.398	3.15936	0.647208	8077	4.44261	188.941	262.297	0.438003	0.481732	2.35826	1.38825
	0.315038	0.00031045	0.000193042	0.000519457	3.40036	0.000131407	4.03432	0.0338664	101.847	2.35335	239.682	8.70243e-05	102.44	2.33974	2695.81	47.7737	163.391	1.64072	0.6817	5983.17	3.50593	273.758	173.745	0.389045	0.397496	1.99746	0.634666
	0.303815	0.000286123	7.96345e-05	0.000503196	4.16401	0.000156637	3.8882	0.0465962	80.1097	2.26812	181.698	0.000103733	80.8057	2.24858	2640.74	43.2398	119.991	2.67581	0.660385	5780.73	3.58129	216.14	122.69	0.42796	0.494071	2.28821	0.567642
	0.334866	0.000295665	0.000130127	0.000424004	1.66097	0.000150013	3.7908	0.0755457	196.092	2.2113	433.619	9.93464e-05	196.366	2.20821	2459.76	46.3552	297.717	1.85309	0.686586	14131	5.40259	242.184	732.009	0.415473	0.449686	2.1521	3.02253
	0.321781	0.000282874	0.000146815	0.000391341	3.20517	0.000146114	3.69482	0.0540027	98.9697	2.15531	213.311	9.6764e-05	99.4818	2.14422	2444.64	47.1848	144.979	1.65509	0.679663	6589.34	3.6721	244.577	189.154	0.41079	0.444535	2.03541	0.773391
	0.321175	0.00031975	0.000151532	0.00036053	2.90485	0.000166373	3.56408	0.0590704	105.357	2.07905	219.043	0.000110181	105.806	2.07024	2360.25	46.503	153.841	1.61883	0.702333	7631.54	4.30715	229.154	229.831	0.424856	0.432345	2.23766	1.00296
	0.339333	0.000305952	0.000174187	0.000448144	2.68573	0.000170883	3.33082	0.0868699	106.509	1.94298	206.944	0.000113168	106.897	1.93593	2146.77	46.4001	142.127	1.6106	0.686791	7456.9	4.25216	213.209	253.593	0.428682	0.433985	2.14922	1.18941
	0.356121	0.000187099	5.15047e-05	0.000509372	0.1	0.000175166	3.68197	0.0425993	3164.42	2.14782	6796.59	0.000116004	3164.43	2.14781	2312.79	42.3665	4545.15	3.17756	0.668739	427441	24.6488	196.492	231213	0.489465	0.807075	2.4442	1176.71
	0.332974	0.000217784	0.000192282	0.000535191	2.61202	0.00013531	3.80294	0.0384162	125.042	2.21838	277.39	8.96094e-05	125.473	2.21076	2474.65	47.4551	185.277	1.79503	0.66793	9906.81	3.84426	254.626	299.438	0.419307	0.551297	1.94341	1.17599
	0.350193	0.000268043	0.000177688	0.000425965	4.03994	0.000154552	4.42472	0.0560066	93.9732	2.58109	242.553	0.000102352	94.7422	2.56014	2804.93	47.5693	186.773	1.54884	0.770029	12554.9	4.40863	297.685	153.251	0.442078	0.592479	2.57057	0.514811
	0.333181	0.000280846	0.000148635	0.000418623	2.5313	0.000128779	4.01474	0.0440784	136.221	2.34193	319.021	8.52844e-05	136.662	2.33437	2611.66	47.9126	215.669	1.69004	0.676036	8639.94	3.94741	274.015	315.552	0.393056	0.429624	1.95303	1.15158
	0.284928	0.000345632	0.000247619	0.000476716	3.06627	0.000178208	3.49466	0.0110755	97.8574	2.03855	199.487	0.000118018	98.3211	2.02894	2437.85	47.1481	145.542	1.38754	0.729581	7225.1	4.48737	230.968	205.19	0.431112	0.419874	2.34902	0.888391
	0.305567	0.000336061	0.000211428	0.000384951	1.89568	0.000152468	3.51632	0.0645358	159.36	2.05119	326.876	0.000100972	159.649	2.04746	2382.16	48.2785	226.906	1.36748	0.694165	9049.47	4.79372	243.677	504.401	0.402091	0.372834	2.02809	2.06996
	0.326191	0.000334948	0.000222861	0.000458926	2.89878	0.000143182	3.64027	0.0788844	107.835	2.12349	228.987	9.48226e-05	108.292	2.11453	2392.88	48.1678	156.182	1.43654	0.682055	5838.67	3.73487	251.111	217.583	0.39215	0.362797	1.96695	0.866484
	0.380637	0.000334004	0.00016305	0.000402186	4.68488	0.000151552	4.34625	0.0426789	79.5537	2.53531	201.694	0.000100365	80.4257	2.50782	2626.1	46.8432	149.892	1.6263	0.743168	7846.92	3.87276	283.547	105.432	0.416851	0.456714	2.46916	0.371831
	0.361844	0.00029995	0.000204707	0.000476766	4.52812	0.000129123	3.1884	0.0710653	60.3898	1.8599	112.319	8.55118e-05	61.0088	1.84103	1984.96	47.9218	67.535	1.52737	0.601279	2084.55	2.21482	217.699	73.4386	0.369647	0.318093	1.54439	0.33734
	0.312365	0.00027353	0.000178343	0.000397346	2.6759	0.000129757	4.26766	0.0795945	136.968	2.48947	340.977	8.59319e-05	137.463	2.4805	2862.86	48.9386	243.626	1.49319	0.714494	10703.8	4.22731	303.886	306.51	0.401435	0.472287	2.09104	1.00863
	0.306541	0.000351521	8.6218e-05	0.000471755	3.19974	0.000167261	3.2094	0.0246991	86.1134	1.87215	161.217	0.000110769	86.5575	1.86254	2171.18	42.5006	98.4166	2.70958	0.61046	3609.45	3.46338	172.358	164.2	0.409138	0.355704	2.02392	0.952666
	0.386118	0.00036613	0.000187539	0.000438182	3.2032	0.000167652	2.89737	0.0684038	77.6571	1.69013	131.251	0.000111028	78.0585	1.68144	1735.17	46.1662	82.791	1.57454	0.630785	3244.42	3.18399	183.599	143.912	0.398065	0.309026	1.8314	0.783838
	0.293466	0.000257472	0.000229413	0.000469121	2.24542	0.000162838	3.6848	0.075658	140.964	2.14946	302.996	0.00010784	141.323	2.144	2539.8	47.7582	220.033	1.47217	0.72619	13292	5.04164	249.878	414.23	0.442239	0.544239	2.26816	1.65773
	0.338531	0.000214343	0.000167739	0.000475408	3.11875	0.000139947	3.72844	0.041118	102.643	2.17493	223.242	9.26804e-05	103.147	2.16432	2405.96	47.4037	149.879	1.74791	0.671377	8577.28	3.57608	249.098	208.986	0.425794	0.567172	1.96779	0.838973
	0.315123	0.000272361	0.000124403	0.000458374	4.81841	0.000157689	4.04103	0.0733711	71.9079	2.35726	169.506	0.00010443	72.7408	2.33027	2699.95	45.493	120.294	1.93615	0.709677	6819.14	3.60991	248.656	96.9861	0.43638	0.541505	2.38727	0.390042
	0.351298	0.000217315	0.000198779	0.000474249	3.9826	9.18032e-05	3.42456	0.0289491	73.7822	1.99766	147.392	6.07968e-05	74.3692	1.98189	2167.22	49.9039	80.7397	1.63778	0.547791	1921.89	1.72176	253.566	93.2155	0.337603	0.336037	1.18203	0.367619
	0.310376	0.000237883	0.000229183	0.000412835	4.03851	0.000132233	3.85239	0.0373297	81.8469	2.24723	183.929	8.75717e-05	82.5163	2.229	2591.76	49.2423	126.539	1.38671	0.687979	5958.4	3.10473	277.731	123.035	0.407353	0.49731	1.91488	0.443001
	0.32457	0.000339436	0.000222178	0.000398338	3.46742	0.00015105	4.07519	0.0193742	100.884	2.37719	239.822	0.000100033	101.495	2.3629	2685.22	48.4082	178.485	1.35065	0.744242	8194.85	4.21205	283.925	178.077	0.410511	0.422035	2.31878	0.6272
	0.345078	0.000218561	0.000178859	0.000328387	2.98694	0.000144501	3.53386	0.0442688	101.588	2.06142	209.415	9.56957e-05	102.045	2.05218	2257.82	49.08	144.035	1.36224	0.687795	8548.74	3.61971	253.09	216.327	0.426472	0.544567	1.92654	0.85474
	0.257721	0.000331094	0.000168644	0.000368022	3.2133	0.0001443	4.40842	0.0350732	117.785	2.57158	302.893	9.55632e-05	118.397	2.55827	3192.29	47.8386	226.562	1.53741	0.747993	9483.38	4.53348	299.956	224	0.409797	0.447509	2.39832	0.746776
	0.333304	0.000215893	0.00018591	0.000553359	4.80136	0.000168182	3.43041	0.0594839	61.26	2.00107	122.586	0.000111379	61.9647	1.97831	2231.13	45.5454	82.8767	1.8622	0.676072	5886.86	3.1957	211.569	86.819	0.456901	0.61855	2.16155	0.410358
	0.340032	0.000273294	0.000179409	0.000416499	1.695	0.000179412	3.65775	0.0367829	185.41	2.13369	395.607	0.000118816	185.68	2.13059	2354.99	46.9472	295.502	1.52365	0.746958	21373.4	6.43727	239.691	748.093	0.45827	0.561383	2.48338	3.12108
	0.365447	0.000333818	0.000148885	0.000338701	3.04344	0.000142654	3.06782	0.0580465	86.5507	1.78956	154.888	9.44728e-05	86.9548	1.78124	1899.11	46.9778	94.3897	1.62838	0.609407	3064.74	2.89279	201.295	160.503	0.378434	0.305517	1.65082	0.797355
	0.333066	0.00029695	0.000257393	0.000450778	2.6889	0.000169194	2.93597	0.0383143	93.7717	1.71265	160.598	0.000112049	94.114	1.70642	1910.23	47.7335	106.001	1.33585	0.66004	5045.78	3.63589	198.892	217.663	0.418418	0.390235	1.8757	1.09438
	0.335313	0.00028014	0.000226943	0.000449392	4.48172	0.000165672	3.61738	0.063686	69.227	2.11014	146.079	0.000109716	69.9224	2.08915	2345.65	47.4396	104.918	1.41929	0.718227	6157.6	3.54196	242.043	100.183	0.435365	0.495887	2.24859	0.413905
	0.318083	0.000265499	0.000171932	0.000488815	1.73553	0.000194747	4.1234	0.0300936	204.129	2.40532	490.994	0.000128971	204.44	2.40165	2743.08	45.9358	396.944	1.69266	0.80845	37167.5	8.09852	258.688	863.324	0.491856	0.707061	3.03859	3.33731
	0.287623	0.000293963	0.000157741	0.000467667	5.04526	0.000182358	4.3006	0.0529948	73.0693	2.50868	183.308	0.000120767	73.9958	2.47727	2988.76	45.5216	144.33	1.72724	0.787367	10356.4	4.57271	264.96	100.854	0.467701	0.6168	2.93487	0.380637
	0.348064	0.000258318	0.000202418	0.000516102	2.62002	0.000128893	3.81703	0.074297	125.121	2.2266	278.595	8.53598e-05	125.555	2.21891	2427.63	48.1885	184.762	1.63705	0.663192	7881	3.65686	263.53	281.964	0.395798	0.44438	1.85807	1.06995
	0.334405	0.000232337	0.000153523	0.000444665	3.9114	0.000172318	3.25839	1e-05	71.4841	1.90073	135.872	0.000114118	72.0329	1.88625	2115.75	46.0456	91.7895	1.71362	0.67556	6164.23	3.44586	205.398	123.105	0.451936	0.561501	2.11164	0.599348
	0.252854	0.000184664	0.000146562	0.000409359	3.33802	0.000128647	3.69123	0.0378094	94.93	2.15322	204.405	8.51966e-05	95.4624	2.14121	2690.47	48.0508	132.657	1.73838	0.648994	6606.33	3.09269	253.39	177.934	0.419603	0.598708	1.78957	0.702212
	0.323326	0.000205915	0.000114859	0.000426573	2.22249	0.000156009	3.92303	0.0224432	151.628	2.28843	346.99	0.000103318	152.006	2.28273	2589.72	46.3219	246.841	1.93218	0.711379	18454.3	5.116	250.272	466.589	0.45837	0.694156	2.31365	1.86433
	0.307487	0.000329394	5.20141e-05	0.00038245	1.87924	0.000142086	4.03238	0.0459142	184.348	2.35222	433.626	9.40964e-05	184.677	2.34802	2724.21	41.5791	267.996	3.74693	0.618035	9379.38	4.85496	207.267	586.34	0.400545	0.406513	2.16742	2.82891
	0.359718	0.000305006	0.000231854	0.000457196	2.62076	0.00014305	2.83385	1e-05	92.8667	1.65308	153.516	9.47352e-05	93.1889	1.64736	1770.11	48.1512	92.3444	1.40724	0.60153	3103.76	2.86923	195.347	200.877	0.380016	0.310105	1.53098	1.0283
	0.316603	0.000327095	0.000228145	0.00048511	4.60532	0.000184278	2.96097	0.055176	55.138	1.72723	95.2362	0.000122038	55.7223	1.70912	1974.05	46.1723	63.5064	1.4584	0.666831	3056.9	3.06516	187.678	76.2513	0.427558	0.386466	2.04615	0.406287
	0.301703	0.000429051	0.000170278	0.000504101	2.26052	0.000136958	4.11254	0.0329797	156.275	2.39898	374.901	9.07003e-05	156.679	2.3928	2801.57	46.4008	256.271	1.84731	0.68357	7209.78	4.57622	263.257	386.102	0.374325	0.306565	2.12904	1.46664
	0.342406	0.000294508	0.000191959	0.000451012	3.07279	0.000157745	3.4787	0.0265914	97.2034	2.02924	197.249	0.000104467	97.666	2.01963	2231.65	47.2463	135.366	1.53282	0.686268	6702.44	3.83073	230.872	197.395	0.418414	0.43418	2.06976	0.854997
	0.320053	0.000225396	8.18059e-05	0.000526978	1.78524	0.000183397	3.53529	0.0554011	170.138	2.06225	350.869	0.000121455	170.413	2.05893	2345.05	43.3171	240.344	2.54663	0.684996	19058.3	5.93444	197.225	680.143	0.47823	0.672398	2.45316	3.44856
	0.33787	0.000271663	0.000121465	0.000435836	3.71495	0.000143625	4.07502	0.0183013	94.1415	2.37709	223.783	9.51157e-05	94.7942	2.36073	2632.23	46.2623	155.133	1.92044	0.693228	7829.75	3.73381	259.299	158.032	0.41834	0.500938	2.20276	0.609459
	0.318582	0.000259475	0.000150833	0.000480383	6.36293	0.000138612	4.05771	0.0271068	54.5818	2.367	129.195	9.17961e-05	55.6713	2.32068	2697.41	46.4292	87.5501	1.78582	0.677659	4078.12	2.70708	260.065	52.5096	0.411757	0.497576	2.08981	0.20191
	0.273713	0.000319308	7.83591e-05	0.000484002	1.79847	0.000179368	3.44468	0.0362032	164.557	2.0094	330.661	0.000118787	164.827	2.00611	2440.67	42.3167	216.001	2.79536	0.65324	10305.5	5.50229	183.396	599.194	0.438834	0.452301	2.33771	3.26721
	0.282254	0.000248348	0.000128949	0.000394776	4.84553	0.000174048	3.58597	0.0672932	63.4516	2.09182	132.729	0.000115263	64.1947	2.0676	2510.9	45.6576	93.5529	1.75777	0.704842	6019.67	3.51373	222.254	88.9143	0.455943	0.581586	2.3379	0.400057
	0.268544	0.000155652	0.000107079	0.000492513	4.43885	0.00016461	3.38119	0.0308007	65.3345	1.97236	128.863	0.000109014	65.9784	1.95311	2412.73	44.5818	83.828	2.3089	0.65052	6980.29	3.14574	199.803	105.603	0.48159	0.829026	2.0887	0.528536
	0.279282	0.000215557	0.000165461	0.000372331	1.31971	0.000149764	3.41617	0.0601734	222.432	1.99277	443.256	9.91817e-05	222.629	1.99101	2401.91	48.2083	300.282	1.51503	0.677445	16870.1	5.41682	236.048	1089.79	0.433215	0.555213	1.9372	4.61682
	0.323503	0.000237096	0.000197666	0.000535621	3.69198	0.000145491	3.5739	0.0691357	83.0797	2.08478	173.202	9.63517e-05	83.6486	2.07059	2358.63	46.9907	114.959	1.72928	0.663727	5949.16	3.25596	234.63	141.386	0.421478	0.509972	1.95715	0.602589
	0.298528	0.000361285	0.000209076	0.000487569	5.22957	0.000170077	3.32156	0.115639	54.4354	1.93758	105.473	0.000112633	55.176	1.91157	2273.03	46.0665	71.2941	1.53878	0.675949	2868.64	2.99738	209.57	63.7508	0.411416	0.36118	2.11216	0.304198
	0.308732	0.000221319	0.0001839	0.000372388	1.59027	0.000161336	3.5212	0.0378991	190.249	2.05403	390.777	0.000106845	190.492	2.05141	2374.59	48.1714	278.69	1.44303	0.713169	18988.5	5.62164	242.933	803.254	0.449901	0.60021	2.15018	3.30648
	0.279839	0.000212909	0.00023083	0.000422481	4.07423	0.00019779	3.5457	0.0557256	74.6684	2.06832	154.438	0.000130987	75.2897	2.05125	2491.05	46.7614	118.376	1.45335	0.766496	11658.5	4.49167	230.512	136.822	0.500956	0.764836	2.63581	0.593555
	0.323868	0.000289406	0.000123318	0.000369923	3.10906	0.000153072	3.585	0.0441036	99.0029	2.09125	207.04	0.000101372	99.4851	2.08112	2364.69	46.2046	138.946	1.81252	0.671109	6460.39	3.76609	227.551	197.594	0.416087	0.441798	2.06959	0.868352
	0.34415	0.000219827	0.000199263	0.000471676	3.49575	0.00018591	3.26609	0.0659774	80.1977	1.90522	152.794	0.000123119	80.6907	1.89358	2089.7	46.2009	107.786	1.62443	0.705432	9116.79	4.02861	207.275	162.549	0.475232	0.642753	2.28706	0.784223
	0.356859	0.000336513	6.86604e-05	0.000412722	1.84341	0.000171913	3.37726	0.0429281	157.4	1.97007	310.089	0.00011385	157.671	1.96668	2118.96	41.8046	193.974	3.0638	0.625543	8821.71	4.99749	175.481	539.536	0.423437	0.403255	2.19652	3.07462
	0.280016	0.000302861	0.000207067	0.000348601	3.54551	0.000162462	3.44079	0.0426582	83.2987	2.00713	167.191	0.000107591	83.8252	1.99452	2416.76	48.1815	118.005	1.30683	0.705809	5534.86	3.6836	237.485	147.465	0.421004	0.429423	2.10514	0.620942
	0.298352	0.000289595	4.06444e-05	0.00050602	2.47741	0.000113128	3.90804	0.0789514	135.489	2.27969	308.873	7.49192e-05	135.909	2.27264	2675.04	41.5684	167.535	4.43622	0.542407	4032.48	3.05629	200.772	297.148	0.364201	0.356327	1.6703	1.48003
	0.330408	0.000258835	5.44898e-05	0.000394384	3.58121	0.000136897	4.39733	0.0534712	105.392	2.56511	270.342	9.06604e-05	106.071	2.54868	2872.44	43.1635	177.377	3.13692	0.65612	8507.08	3.80552	243.58	183.755	0.418823	0.541035	2.26674	0.754392
	0.284742	0.000286144	0.000166068	0.000471778	3.14668	0.000166549	4.29169	0.0478216	117.099	2.50349	293.156	0.000110297	117.683	2.49106	2994.63	46.5598	226.247	1.6859	0.771766	14359.6	5.22883	276.61	250.239	0.450915	0.581943	2.69537	0.904663
	0.32203	0.000293463	0.000215652	0.000396255	3.1944	0.00013782	3.61566	0.051707	97.1766	2.10913	204.958	9.12714e-05	97.6761	2.09835	2391.39	48.9585	138.867	1.35554	0.677539	5498.28	3.38987	257.668	178.889	0.394335	0.395526	1.8788	0.694262
	0.355558	0.000184491	8.21372e-05	0.000461593	3.04378	0.000136503	3.82514	0.0481996	107.904	2.23133	240.77	9.03991e-05	108.408	2.22096	2404.82	45.4971	155.217	2.37406	0.644667	9927.74	3.54962	235.414	230.305	0.435601	0.659548	1.96958	0.978296
	0.254227	0.000310691	0.000189575	0.000376558	4.87902	0.000153919	3.76139	0.0769676	66.0965	2.19415	145.025	0.000101933	66.8812	2.1684	2736.58	47.6186	102.671	1.42544	0.707954	4346.88	3.25528	253.583	83.4976	0.413888	0.431165	2.16833	0.329271
	0.321799	0.00037736	0.00020579	0.000486751	5.60439	0.00013275	3.40841	0.0442963	52.1014	1.98824	103.59	8.79138e-05	52.9132	1.95773	2255.08	47.1234	64.0411	1.5618	0.618218	1625.46	2.21735	225.031	50.0546	0.361838	0.276421	1.68842	0.222435
	0.302282	0.000228389	0.000232345	0.000527231	2.23325	0.000162749	3.54046	0.019475	136.181	2.06527	281.249	0.000107781	136.524	2.06007	2409.86	47.0243	197.072	1.64573	0.700703	12844.1	4.76871	232.768	408.732	0.449246	0.589202	2.17817	1.75596
	0.311245	0.000239801	0.000175499	0.000468325	5.2103	0.000146846	3.85598	0.0427299	63.4287	2.24932	142.671	9.72491e-05	64.2854	2.21934	2590.9	47.0215	98.5571	1.65968	0.690798	5376.23	3.04283	253.48	77.4802	0.427533	0.545474	2.11728	0.305665
	0.327365	0.000313921	0.000122606	0.000535739	4.42995	0.000149517	3.43304	0.0415122	66.4703	2.00261	133.114	9.90177e-05	67.1228	1.98314	2252.74	44.7393	83.4537	2.13351	0.626935	3150.02	2.85091	204.303	89.4438	0.400121	0.379107	1.92635	0.437799
	0.343659	0.000199086	0.000155677	0.000468812	3.51904	0.000126833	3.55098	0.0252554	86.6146	2.0714	179.414	8.39955e-05	87.154	2.05858	2273.68	47.5992	112.297	1.81683	0.62591	5462.89	2.80536	239.202	149.397	0.407123	0.526381	1.69626	0.624566
	0.335177	0.000303185	0.000214881	0.000476184	2.22527	0.000157483	4.2411	0.0360772	163.716	2.47398	405.029	0.000104293	164.126	2.4678	2750.66	47.8103	310.664	1.49078	0.767016	18254.7	5.79361	288.231	475.236	0.432935	0.514486	2.52484	1.6488
	0.347961	0.000248512	0.000129692	0.000505115	2.7008	0.000139156	4.29818	0.0371288	136.673	2.50727	342.677	9.21561e-05	137.177	2.49807	2734.07	46.5653	242.11	1.97436	0.706525	13606.7	4.51938	277.094	320.334	0.424361	0.561433	2.25838	1.15604
	0.338881	0.000221459	0.00015971	0.000436626	5.04879	0.00015093	3.58278	0.0674468	60.8303	2.08995	127.132	9.99535e-05	61.6027	2.06375	2310.74	46.8374	85.5216	1.67911	0.672697	5153.58	2.91329	233.681	77.881	0.434138	0.564517	2.02359	0.33328
	0.269812	0.000325898	0.000276957	0.000436977	2.66573	0.000149732	3.18868	0.0550152	102.729	1.86006	191.082	9.91603e-05	103.098	1.85341	2271.42	48.8395	126.516	1.25877	0.662104	4362.5	3.51528	226.137	225.809	0.392808	0.341778	1.80293	0.998552
	0.307925	0.000298376	0.000162996	0.000426049	3.13867	0.000149129	3.86204	0.0660612	105.645	2.25285	238.004	9.87612e-05	106.17	2.24173	2607.48	47.1946	167.132	1.62923	0.702225	7689.22	4.02406	255.751	207.96	0.414298	0.449699	2.17189	0.813135
	0.314393	0.000218795	0.000147843	0.000434099	0.15345	0.000193159	4.3384	0.0551956	2429.83	2.53074	6149.26	0.00012792	2429.86	2.5307	2901.73	46.2061	5112.24	1.73198	0.831359	603322	28.8264	275.389	121679	0.514764	0.896719	3.17576	441.843
	0.284131	0.00025429	0.000228776	0.000571442	4.65672	0.000140092	3.26575	0.0106787	60.1393	1.90502	114.567	9.27762e-05	60.7907	1.88461	2280.7	47.0003	71.2014	1.67937	0.621484	2729.5	2.46734	214.488	76.8973	0.399755	0.41672	1.71525	0.358516
	0.36849	0.000286437	0.000245784	0.000418636	4.34057	0.000154064	3.83224	0.051015	75.7335	2.23547	169.3	0.000102029	76.4477	2.21459	2360.94	48.5036	123.436	1.31346	0.729094	6993.83	3.57268	268.052	109.951	0.422954	0.478085	2.2166	0.410186
	0.309565	0.000276337	0.000249512	0.000519855	5.17808	0.000120676	3.46738	0.034354	57.3934	2.02264	116.086	7.99178e-05	58.1592	1.996	2335.48	48.5344	71.1595	1.49437	0.612989	2106.95	2.12475	242.839	60.862	0.368842	0.349851	1.56486	0.250627
	0.281094	0.000267045	0.000164673	0.000364138	3.93116	0.000137303	3.7584	0.0392237	82.038	2.1924	179.86	9.09289e-05	82.6741	2.17553	2635.89	48.2845	122.145	1.49263	0.679113	5073.23	3.1673	260.518	125.56	0.403684	0.448951	1.9406	0.481963
	0.332446	0.000248743	0.000231776	0.000398837	1.34143	0.000171272	3.69227	0.0342838	236.515	2.15382	509.412	0.000113425	236.731	2.15186	2404.54	48.3553	384.835	1.33831	0.75545	28678.8	7.01286	256.684	1203.25	0.457245	0.594688	2.39438	4.68768
	0.300016	0.000330253	0.000119434	0.000471216	3.23854	0.00015569	3.73847	0.0281302	99.105	2.18078	216.126	0.000103106	99.6285	2.16932	2552.9	44.9175	145.186	2.096	0.671767	5987.55	3.91556	224.256	188.032	0.412051	0.410464	2.19419	0.83847
	0.361619	0.000289278	0.000153164	0.000412997	4.83344	0.000193871	3.55016	0.0905189	62.9757	2.07092	130.418	0.000128392	63.7096	2.04707	2210.95	45.3254	95.8325	1.65818	0.734811	7258.95	3.96133	216.845	90.3865	0.465825	0.550642	2.57832	0.416826
	0.333691	0.000189661	0.000230939	0.000548933	2.15341	0.000183177	4.4184	0.056344	176.257	2.5774	454.286	0.000121309	176.671	2.57137	2872.05	46.0643	369.592	1.85777	0.813567	47055.4	7.35027	278.748	631.527	0.517106	0.996772	3.06004	2.26559
	0.380667	0.000394388	0.000138498	0.0004422	4.3183	0.00015833	4.1612	0.0414649	82.6602	2.42737	200.647	0.000104854	83.4318	2.40492	2514.17	44.9503	143.222	1.98443	0.713799	6388.11	3.95493	249.978	116.621	0.408901	0.387506	2.47375	0.466523
	0.308323	0.000301579	0.0001824	0.000398655	4.49915	0.000181247	3.5511	0.0515076	67.6944	2.07148	140.227	0.000120031	68.3796	2.05072	2396.17	46.4859	102.271	1.48764	0.729326	6167.86	3.82577	228.152	100.199	0.44703	0.49467	2.41474	0.439177
	0.312218	0.000269772	0.000186015	0.000512449	2.92383	0.000124649	3.52921	0.0546439	103.648	2.05871	213.381	8.25491e-05	104.095	2.04987	2367.99	47.9797	133.178	1.67492	0.624132	4431.66	3.00246	241.552	200.758	0.379701	0.380152	1.66	0.831116
	0.311784	0.00025002	0.000221776	0.00045991	2.27653	0.000180087	3.52415	0.0466634	132.974	2.05575	273.361	0.000119263	133.322	2.05038	2366.08	47.1439	201.527	1.48342	0.737218	14859.7	5.33606	232.875	404.061	0.463644	0.592763	2.39888	1.7351
	0.331116	0.000344526	0.000138484	0.000504592	4.01354	0.000149534	4.02426	0.0497443	86.0321	2.34748	201.959	9.90293e-05	86.7272	2.32867	2625.96	45.4593	139.419	1.97622	0.690333	5764.41	3.6853	247.257	129.637	0.405799	0.405664	2.26225	0.524302
	0.324149	0.000351692	0.000128058	0.000463585	0.456443	0.000174382	4.23292	0.0502056	797	2.4692	1967.95	0.000115485	797.084	2.46894	2790.89	44.8918	1491.76	2.03225	0.758027	85824.2	14.058	253.624	11536.6	0.442608	0.491348	2.79708	45.4872
	0.355547	0.000358222	0.000297699	0.000400121	4.79417	0.000147366	3.47341	0.0444998	62.1215	2.02616	125.868	9.75932e-05	62.834	2.00318	2183.73	49.1611	86.518	1.16013	0.687372	3215.39	2.86102	249.584	74.7737	0.38747	0.330753	1.91783	0.299593
	0.298521	0.000248245	0.000118557	0.000373907	6.07702	0.000140602	3.99561	0.0801615	56.2955	2.33077	131.212	9.31141e-05	57.3229	2.289	2734.32	46.4154	88.913	1.80004	0.677629	4273.62	2.76724	255.932	57.5112	0.41745	0.520351	2.09088	0.224713
	0.321838	0.000280106	0.000186928	0.000426931	2.10903	0.000143852	3.67797	0.0394546	149.811	2.14548	321.417	9.52665e-05	150.148	2.14067	2433.29	48.1128	220.838	1.51132	0.687076	10031.6	4.46195	253.132	433.097	0.408623	0.441247	2.00059	1.71095
	0.296424	0.000342643	0.000159912	0.000460204	3.14263	0.000112647	3.78525	0.0676437	103.414	2.20806	228.344	7.46009e-05	103.929	2.19713	2598.11	47.9461	140.166	1.7429	0.613837	3138.15	2.78365	258.713	171.189	0.348842	0.289917	1.60793	0.661696
	0.332275	0.000295919	0.000183045	0.000452657	2.06317	0.000159842	3.26956	0.0548366	136.138	1.90724	259.648	0.000105856	136.431	1.90314	2129.8	47.0151	173.266	1.57316	0.667314	8116.86	4.39156	214.873	409.722	0.416137	0.412599	1.9763	1.90681
	0.360122	0.000239499	0.000115598	0.000645217	2.90279	0.000202277	3.80061	0.0687088	112.429	2.21702	249.258	0.000133958	112.907	2.20764	2372.48	43.2043	185.193	2.38293	0.742978	19055.4	5.74553	210.924	290.433	0.502756	0.748358	2.90112	1.37696
	0.309781	0.00029156	0.000158593	0.000444365	5.92478	0.000160164	3.37219	0.0350635	48.7419	1.96711	95.8807	0.000106069	49.5885	1.93353	2270.65	45.851	62.9578	1.68126	0.656627	2837.76	2.65254	210.779	51.0566	0.417231	0.426312	2.01191	0.242228
	0.350659	0.000283596	0.000212165	0.000459712	3.6011	0.000170977	3.62886	0.0388594	86.4922	2.11684	183.09	0.00011323	87.056	2.10313	2298.77	47.1193	133.13	1.47884	0.72713	8443.25	4.11763	239.544	158.356	0.44225	0.508911	2.33612	0.661072
	0.320425	0.000343632	0.000156725	0.000388017	3.96867	0.000122398	3.95628	0.0501449	85.5384	2.30783	197.408	8.10581e-05	86.2142	2.28974	2622.87	47.7884	128.522	1.66087	0.651049	3632.23	2.89623	268.627	117.606	0.36611	0.327345	1.82075	0.437804
	0.338046	0.000188004	0.000109088	0.000469668	2.95305	0.000128141	3.33701	0.0940809	97.0321	1.94659	188.881	8.48613e-05	97.4588	1.93806	2154.95	46.4942	112.623	2.1108	0.596263	5409.46	2.83839	214.473	200.531	0.409189	0.530183	1.61342	0.934994
	0.297324	0.00029328	0.000175941	0.000439782	5.43198	0.000150555	4.17009	0.0491313	65.7805	2.43255	160.014	9.97051e-05	66.7446	2.39741	2858.59	47.0244	116.335	1.58323	0.727031	5768.96	3.38939	274.163	76.0831	0.422139	0.493963	2.34493	0.277511
	0.359358	0.000188638	0.000149953	0.000459502	3.05048	0.000124724	3.46566	0.0615534	97.5484	2.02163	197.207	8.25984e-05	98.006	2.01219	2165.97	47.6782	121.217	1.84694	0.614668	6045.9	2.86617	234.231	193.831	0.406429	0.533984	1.63046	0.827522
	0.341954	0.00025064	0.000215227	0.00034498	2.59127	0.00016559	3.64658	0.067518	120.862	2.12717	257.095	0.000109662	121.272	2.11998	2340.96	48.7915	191.264	1.27047	0.743941	13301.1	4.77992	258.102	311.188	0.447244	0.562153	2.28065	1.20568
	0.324307	0.000293075	0.000235611	0.000467224	5.94035	0.000159794	3.52406	0.0217386	50.8024	2.0557	104.435	0.000105824	51.6894	2.02043	2322.97	47.1773	72.0428	1.41905	0.689836	3531.27	2.83091	233.199	53.4244	0.419982	0.442145	2.09747	0.229094
	0.354287	0.000341855	0.000107411	0.000470042	3.33043	0.000129773	3.91753	0.030633	100.98	2.28523	230.763	8.59422e-05	101.544	2.27254	2467.77	45.2281	145.859	2.27883	0.632073	4615.39	3.27131	238.258	170.473	0.377061	0.346251	1.91596	0.715499
	0.292401	0.000267056	0.000162692	0.000384775	3.15007	0.000188453	3.7464	0.0268715	102.11	2.1854	223.152	0.000124803	102.621	2.17453	2586.15	46.4997	170.941	1.54114	0.76603	13116	5.14277	240.842	228.784	0.473278	0.615892	2.66232	0.949933
	0.328745	0.000225781	0.000214645	0.000386674	3.36808	0.000133271	3.69704	0.0492318	94.2289	2.15661	203.215	8.82592e-05	94.7669	2.14436	2420.99	49.3651	138.008	1.38224	0.679124	6907.77	3.26784	267.862	171.182	0.410356	0.508028	1.85664	0.639068
	0.305338	0.000210664	0.000164448	0.000428235	2.09602	0.000170348	3.33873	0.0706327	136.838	1.9476	266.504	0.000112813	137.142	1.94328	2262.6	46.7796	184.59	1.65691	0.692633	13472	4.83072	217.226	449.773	0.461721	0.630695	2.15062	2.07053
	0.326458	0.000164466	0.000189174	0.000424627	4.48079	0.000129297	3.51079	0.0592407	67.2013	2.04796	137.626	8.56271e-05	67.876	2.0276	2306.86	47.9549	86.962	1.72562	0.631874	5126.62	2.51666	240.043	95.0211	0.425291	0.639786	1.70319	0.39585
	0.307713	0.000246132	0.000201275	0.000419498	4.70563	0.00017398	3.28597	0.0182623	59.88	1.91681	114.779	0.000115218	60.542	1.89585	2219.22	46.9465	79.6394	1.46361	0.693851	5053.5	3.24066	215.321	85.0825	0.448907	0.537867	2.14287	0.395142
	0.321708	0.000245419	0.000164502	0.000391014	3.28569	0.000183118	4.1215	0.0586039	107.688	2.40421	258.904	0.000121271	108.273	2.39121	2727.25	46.8647	206.619	1.54257	0.798054	18823.8	5.494	269.132	236.305	0.483519	0.716113	2.84474	0.878028
	0.335841	0.000286368	0.000180198	0.000526473	1.70802	0.00014998	3.74373	0.0609861	188.32	2.18384	411.26	9.93245e-05	188.598	2.18062	2425.65	46.9641	284.25	1.71382	0.691169	13949.6	5.27782	245.501	686.18	0.41703	0.458382	2.12474	2.79502
	0.363292	0.000254732	0.000109164	0.000378925	2.58748	0.000166582	3.58659	0.0809633	119.048	2.09218	249.07	0.000110319	119.451	2.08513	2227.79	45.6247	172.351	1.91051	0.691978	11344.9	4.56465	221.973	305.876	0.445653	0.547289	2.25659	1.37799
	0.34004	0.000263196	0.000257134	0.000439753	3.29081	0.000169208	3.12553	0.0428034	81.5375	1.82323	148.661	0.000112059	81.9821	1.81334	2012.3	47.8339	101.367	1.3472	0.681864	5849.03	3.55583	212.624	160.225	0.433665	0.467908	1.99339	0.753557
	0.350546	0.000257192	0.000120437	0.000385979	1.20801	0.00016073	3.57784	0.0492492	254.508	2.08708	531.177	0.000106444	254.696	2.08553	2266.85	46.282	366.286	1.81812	0.689573	22172	6.42065	227.857	1375.06	0.437277	0.523114	2.17774	6.03474
	0.309747	0.000297847	0.00024363	0.000392549	3.25915	0.000150124	2.95316	0.0760665	77.7908	1.72268	134.008	9.942e-05	78.2069	1.71351	1988.6	48.6851	85.1547	1.27025	0.635443	3143.13	2.89152	208.112	140.241	0.394022	0.346644	1.67121	0.67387
	0.327032	0.00022231	6.45581e-05	0.000542407	1.86534	0.000124726	3.30447	0.0532433	152.196	1.92761	293.374	8.26002e-05	152.464	1.92422	2169.44	44.1064	163.133	2.94172	0.556056	5831.51	3.32506	191.127	475.018	0.39014	0.433302	1.55921	2.48535
	0.349135	0.000281043	0.000176084	0.000417941	2.00438	0.000136127	3.40277	0.0248326	145.844	1.98495	289.494	9.01505e-05	146.141	1.98092	2160.6	48.1528	186.285	1.54159	0.643487	7289.52	3.87798	234.582	424.688	0.391146	0.385104	1.75188	1.8104
	0.289044	0.000226361	0.000125337	0.000457409	3.09735	0.000145491	3.55021	0.0690143	98.4132	2.07095	203.809	9.63515e-05	98.889	2.06099	2462.34	46.3825	133.212	1.91336	0.653613	6763.86	3.50493	227.08	201.508	0.425262	0.531679	1.94806	0.88739
	0.303914	0.000276062	0.000117911	0.000431552	3.9182	0.000156392	3.70497	0.0739004	81.1399	2.16123	175.362	0.000103571	81.7649	2.14471	2515.94	45.5219	118.976	1.95225	0.678459	5953.37	3.56054	228.268	131.722	0.426768	0.487658	2.17909	0.577051
	0.319514	0.000328799	7.88627e-05	0.000477037	1.22806	0.000148316	4.00586	0.0413095	280.301	2.33675	654.992	9.82228e-05	280.515	2.33496	2659.29	43.3769	430.27	2.81005	0.656909	17372.6	6.42142	224.094	1393.52	0.409051	0.422745	2.24989	6.21846
	0.315925	0.000327999	0.000294135	0.000349097	1.07319	0.000165026	4.43122	0.0473369	354.822	2.58488	917.171	0.000109289	355.029	2.58337	2957.19	50.0642	771.54	1.08973	0.841217	49117.4	9.56759	330.214	2173.98	0.440529	0.521682	2.76969	6.58355
	0.308456	0.000272144	0.000163777	0.000399546	2.85208	0.000168345	3.7406	0.0327478	112.625	2.18202	245.75	0.000111487	113.087	2.1731	2523.56	46.9872	179.732	1.56491	0.73136	11168.1	4.71069	245.538	262.511	0.445692	0.539537	2.37669	1.06913
	0.293618	0.000299844	0.000123853	0.000446946	3.13429	0.000146557	3.89367	0.0323384	106.66	2.27131	242.257	9.70574e-05	107.188	2.26012	2683.19	45.9243	164.778	1.95578	0.680179	7003.15	3.92669	244.154	208.566	0.410978	0.443385	2.15194	0.854239
	0.346783	0.000275861	0.000217251	0.000521787	1.6193	0.000191776	3.64537	0.04232	193.425	2.12647	411.312	0.000127004	193.682	2.12365	2323.01	46.3152	312.856	1.58063	0.760628	25450.7	7.08006	232.491	842.522	0.472622	0.592549	2.64586	3.62389
	0.315061	0.000317029	0.000168628	0.000407427	3.00342	0.000148557	3.857	0.0224572	110.268	2.24991	248.093	9.8382e-05	110.769	2.23973	2577.23	47.3705	174.453	1.58259	0.703175	7598.59	4.09546	257.325	223.675	0.408495	0.421239	2.16162	0.869233
	0.27558	0.000224377	0.000250567	0.000431797	3.38179	0.000180926	3.87675	0.0384211	98.4079	2.26144	222.543	0.000119819	98.9743	2.2485	2739.75	47.6334	173.994	1.40995	0.781844	15141.4	4.98127	261.522	209.688	0.483279	0.727703	2.64293	0.801797
	0.328889	0.000281019	0.000186558	0.000427043	2.39324	0.000168779	3.15076	0.0724704	113.081	1.83794	207.837	0.000111774	113.409	1.83264	2062.82	47.009	139.834	1.51298	0.672807	7362.28	4.16579	207.012	302.213	0.42871	0.441774	2.0095	1.45989
	0.318209	0.000274032	0.000152877	0.000487205	4.00864	0.00018609	3.65811	0.0583459	78.3003	2.1339	167.085	0.000123238	78.9314	2.11684	2433.1	45.2717	122.174	1.7852	0.731211	8735.52	4.29323	222.909	135.35	0.464949	0.576963	2.55919	0.6072
	0.3317	0.000300743	0.000187743	0.000454821	4.5028	0.000156748	3.40525	0.0684024	64.8612	1.9864	128.84	0.000103806	65.5187	1.96646	2220.1	46.8447	86.2315	1.55711	0.669291	3900.8	3.03812	222.171	88.5118	0.412474	0.411368	2.00253	0.398395
	0.309113	0.000289867	0.000173402	0.000455862	4.716	0.000184408	3.59596	0.0334429	65.3841	2.09764	137.152	0.000122125	66.1102	2.0746	2423.67	45.7796	99.9412	1.62216	0.728687	6468.41	3.8479	224.066	94.0425	0.455418	0.529732	2.48546	0.419709
	0.333901	0.000217966	0.000122487	0.00043166	2.9196	0.000154154	4.3996	0.0435985	129.398	2.56643	332.091	0.000102089	129.954	2.55545	2858.93	46.5802	249.851	1.87995	0.752356	19667.7	5.08588	283.814	304.419	0.460517	0.72539	2.55925	1.0726
	0.326292	0.000259811	0.000209906	0.000548189	2.79437	0.00011032	3.9038	0.0584887	119.97	2.27721	273.197	7.30595e-05	120.443	2.26828	2565.73	48.8558	171.822	1.67385	0.628929	5351.15	3.01831	277.036	235.221	0.367311	0.386573	1.6257	0.849061
	0.309348	0.000317764	0.000175188	0.000441185	3.69367	0.000150474	4.18122	0.0239375	97.1531	2.43904	236.961	9.96516e-05	97.819	2.42244	2817.18	47.2105	173.813	1.60112	0.733511	8265.19	4.1407	277.075	163.559	0.41714	0.460413	2.36813	0.590308
	0.31906	0.000332227	0.000137203	0.000424658	1.83647	0.00011281	3.484	0.0525961	162.989	2.03233	331.248	7.47085e-05	163.268	2.02887	2314.4	47.5699	193.998	1.84982	0.585658	4266.59	3.27957	234.402	458.3	0.346041	0.276506	1.48694	1.95519
	0.328171	0.000232388	0.000243845	0.000429628	3.90718	0.000165649	3.34433	0.044498	73.449	1.95086	143.289	0.000109701	74.0117	1.93603	2191.9	47.8056	99.8281	1.40088	0.696692	6539.16	3.45451	227.24	124.795	0.445402	0.553894	2.0835	0.549179
	0.364845	0.000258456	0.000231266	0.000367074	3.50644	0.000133599	3.7742	0.0525234	92.391	2.20161	203.409	8.8476e-05	92.9623	2.18808	2338.6	49.844	141.068	1.26891	0.693518	6746.13	3.31198	278.785	157.712	0.401463	0.453961	1.89915	0.565711
	0.315523	0.000260091	0.000193336	0.000399132	3.26611	0.000150201	3.70717	0.0581447	97.4438	2.16251	210.724	9.94709e-05	97.9672	2.15096	2475.44	48.2159	148.617	1.43993	0.705268	7883.39	3.82189	256.236	188.539	0.423791	0.498563	2.09893	0.735804
	0.323063	0.000308573	0.000232245	0.000478187	3.61822	0.000173828	3.63619	0.048262	86.2556	2.12111	182.958	0.000115118	86.8232	2.10724	2401.3	47.1228	134.28	1.43916	0.733938	7775.46	4.20431	240.063	155.883	0.43862	0.476448	2.37972	0.649343
	0.392479	0.00026428	0.000110372	0.000445358	0.672432	0.000140436	3.907	0.0221568	499.331	2.27908	1138.02	9.30039e-05	499.446	2.27856	2315.56	46.2285	765.843	2.03981	0.672962	40200.3	8.11184	248.245	4587.31	0.413848	0.485975	2.07889	18.479
	0.334486	0.000344137	0.000278639	0.000436916	2.69771	0.00011914	4.11987	0.0589725	131.154	2.40326	315.196	7.89005e-05	131.636	2.39446	2674.81	50.4292	218.478	1.25233	0.693148	6610.23	3.67563	311.506	264.557	0.364802	0.332715	1.85335	0.849285
	0.343338	0.00024422	0.000134396	0.000477258	4.07977	0.000164179	4.1181	0.0765481	86.6045	2.40222	208.043	0.000108728	87.3271	2.38234	2638.1	45.8017	153.358	1.88569	0.737146	11318.3	4.24367	256.848	144.744	0.457544	0.642806	2.54105	0.563537
	0.294998	0.00033633	0.000181051	0.000433744	5.32483	0.000168325	3.43814	0.0532548	55.3324	2.00558	110.974	0.000111473	56.1123	1.97771	2364.65	46.0727	75.9154	1.57364	0.684084	3307.37	3.06114	216.984	64.6487	0.417966	0.397267	2.16273	0.297942
	0.290309	0.000298261	0.000283013	0.000447116	1.08452	0.000129238	3.88194	0.0334511	307.591	2.26446	696.528	8.55878e-05	307.774	2.26311	2687.63	50.1005	485.668	1.27648	0.69727	17620.9	5.9447	289.702	1638.07	0.386946	0.393584	1.90015	5.65434
	0.34903	0.000344191	0.000176216	0.000398283	5.7135	0.000107179	4.2813	0.0309042	64.1866	2.49742	160.301	7.09793e-05	65.2251	2.45766	2718.87	48.7129	103.135	1.5552	0.643385	2527.82	2.27187	302.052	57.9183	0.346513	0.307163	1.71128	0.19175
	0.338651	0.000255446	0.000143315	0.000379153	3.68766	0.000152983	3.59572	0.020188	83.6852	2.09751	175.53	0.000101313	84.257	2.08327	2319.9	47.0662	120.024	1.63334	0.683777	6570.65	3.49822	236.822	144.222	0.42632	0.500759	2.07053	0.608988
	0.331479	0.000285362	0.000210305	0.000544942	5.76804	0.000150198	3.79214	0.0831059	56.3118	2.21208	124.566	9.94686e-05	57.24	2.17621	2473.16	46.6243	85.4489	1.63327	0.685971	4092.81	2.89793	245.091	60.3632	0.415599	0.459735	2.12352	0.246289
	0.29757	0.00025937	0.000190079	0.000507186	2.66126	0.00012648	4.0935	0.0304853	132.102	2.38788	315.443	8.37616e-05	132.574	2.37937	2805.11	48.2689	214.952	1.66	0.681429	8764.53	3.87047	283.561	294.153	0.397252	0.465696	1.95513	1.03735
	0.346678	0.000374467	0.0001418	0.000339755	3.72273	0.000157587	4.21737	0.0534002	97.2259	2.46013	239.188	0.000104362	97.9027	2.44312	2687.94	45.9883	175.643	1.77406	0.734329	8072.26	4.35919	265.188	161.094	0.413784	0.412657	2.50125	0.607473
	0.31123	0.000345645	0.000173656	0.000415518	3.79713	0.00017223	4.07388	0.0182333	92.0725	2.37643	218.804	0.000114059	92.7391	2.35935	2737.37	46.3621	166.41	1.59627	0.760544	9136.94	4.63734	260.347	157.759	0.436474	0.471855	2.63993	0.605958
	0.328493	0.000194299	0.000219883	0.000426992	2.02215	0.000141709	3.91688	0.020539	166.403	2.28485	380.205	9.38472e-05	166.747	2.28013	2565.92	48.655	270.605	1.54062	0.711734	18710.7	4.86561	275.685	542.63	0.441916	0.667462	2.09918	1.9683
	0.305675	0.000288965	0.000115583	0.000442019	1.99568	0.000154011	3.92602	0.0459133	169.005	2.29018	387.053	0.000101994	169.346	2.28557	2659.3	45.6505	269.775	2.01486	0.696997	13475.7	5.27988	243.255	538.006	0.425751	0.488924	2.28686	2.2117
	0.33519	0.000230444	0.000199768	0.000462241	5.00367	0.000164202	3.93617	0.0455393	67.4363	2.2961	154.841	0.000108743	68.2776	2.26781	2552.84	46.9412	114.141	1.57972	0.737152	8570.33	3.66159	257.869	91.8735	0.457819	0.648572	2.41922	0.356279
	0.337907	0.00033684	0.000150862	0.000435239	3.35597	0.00014725	3.49683	0.0665056	89.4487	2.03982	182.459	9.75166e-05	89.9558	2.02832	2258.63	46.3376	118.907	1.76244	0.65169	4384.08	3.35143	223.234	156.496	0.393773	0.355883	1.94037	0.70104
	0.394841	0.000187706	0.000180256	0.000473806	3.10821	0.000170799	3.63697	0.0627363	100.466	2.12157	213.144	0.000113112	100.955	2.11129	2147.14	46.3635	152.714	1.78276	0.71648	15502.6	4.4055	232.44	231.693	0.480658	0.771071	2.34274	0.996787
	0.320247	0.000223272	0.000119775	0.000468425	0.893578	0.000126469	3.40359	0.0708871	327.329	1.98543	649.888	8.37546e-05	327.461	1.98463	2257.05	47.0241	394.006	1.98104	0.606267	15718.1	5.23972	223.767	2160.4	0.395113	0.451201	1.63063	9.65468
	0.334658	0.000283494	0.00015638	0.000458653	1.98597	0.00014672	3.82316	0.0337617	165.383	2.23018	368.833	9.71657e-05	165.713	2.22574	2481.53	47.0897	255.417	1.71535	0.6925	12372.6	4.89425	252.054	515.614	0.414938	0.462337	2.12156	2.04565
	0.331518	0.000273493	0.000170651	0.000532331	4.18266	0.000144842	3.59819	0.0510187	73.8028	2.09894	154.908	9.59219e-05	74.4497	2.0807	2346.53	46.5441	101.859	1.77453	0.657549	4553.31	3.05117	231.755	107.503	0.408861	0.44228	1.95793	0.463864
	0.307745	0.000297916	0.00019156	0.000455559	3.39634	0.000154632	3.49968	0.0548154	88.455	2.04148	180.579	0.000102405	88.9685	2.0297	2363.45	47.2469	123.004	1.54218	0.681162	5517.45	3.57957	232.27	160.611	0.413595	0.422841	2.03903	0.691484
	0.353841	0.00026424	0.000246759	0.000469092	6.96883	0.000174237	3.23816	0.0301533	39.7378	1.88893	75.0618	0.000115389	40.6842	1.84499	2041.22	46.431	50.8518	1.42305	0.677465	3069.85	2.59338	207.555	37.1712	0.438849	0.488286	2.08846	0.179091
	0.289964	0.000293087	0.0001894	0.000444024	4.27667	0.000170262	3.56855	0.0208071	71.5801	2.08166	149.005	0.000112756	72.2357	2.06276	2471.86	46.6852	106.09	1.53122	0.711991	5722.59	3.66039	231.242	108.831	0.436389	0.480962	2.28171	0.470634
	0.327343	0.00031859	0.000206035	0.000471024	3.62206	0.000161038	4.03953	0.0368989	95.7215	2.35639	225.557	0.000106647	96.3527	2.34096	2650.8	47.2479	168.388	1.51238	0.746542	9085.53	4.36168	268.111	168.781	0.428402	0.474928	2.44913	0.62952
	0.396197	0.000268599	0.00018782	0.000456211	2.47149	0.000139232	3.67507	0.0565866	127.718	2.14379	273.8	9.22069e-05	128.112	2.13719	2164.77	48.0378	184.638	1.56428	0.674352	9165.94	3.94886	252.144	312.355	0.405162	0.44465	1.9332	1.23879
	0.326591	0.000276403	0.000109256	0.000467432	3.16347	0.00017613	3.66585	0.0783529	99.4908	2.13841	212.752	0.000116643	99.9924	2.12768	2408.27	44.4705	149.049	2.1105	0.700575	9489.82	4.48817	215.544	212.189	0.452425	0.544173	2.43463	0.984432
	0.250326	0.000176711	0.000212862	0.000447376	1.59243	0.000151073	3.31474	0.0624751	178.852	1.9336	345.828	0.000100048	179.081	1.93112	2424.24	47.5773	228.701	1.68093	0.661316	14670.5	4.7686	223.084	754.164	0.449932	0.662631	1.89534	3.38063
	0.328537	0.000319546	0.000138487	0.00043228	4.19613	0.000148787	3.93721	0.0385914	80.4964	2.29671	184.877	9.85346e-05	81.2064	2.27663	2579.07	46.0855	127.61	1.8301	0.690247	5556.37	3.50816	248.619	116.909	0.40898	0.425464	2.20064	0.470235
	0.333933	0.000324996	8.95768e-05	0.000441323	2.03333	0.000169529	3.26977	0.0622861	138.147	1.90736	263.496	0.000112271	138.436	1.90338	2124.65	43.2652	166.651	2.49303	0.632462	7378.05	4.56791	181.975	426.42	0.420621	0.398501	2.09633	2.34328
	0.334641	0.000226517	0.000243202	0.00038161	3.50199	0.000137384	3.89369	0.0264025	95.4375	2.27132	216.769	9.09825e-05	96.0262	2.25739	2527.37	49.6828	154.342	1.30804	0.712014	8742.38	3.56245	285.753	170.899	0.42061	0.549517	2.01481	0.598067
	0.349409	0.000334136	5.42043e-05	0.000517189	5.13946	0.000177003	3.75275	0.0539701	62.5863	2.1891	137.008	0.000117221	63.4092	2.16069	2381.83	39.8221	86.8298	3.85611	0.633757	4312.52	3.4426	176.936	79.2186	0.436953	0.459399	2.48466	0.447725
	0.369843	0.000276164	0.00014956	0.000502706	3.09429	0.000143468	3.39862	0.0492758	94.3046	1.98253	186.962	9.50116e-05	94.7596	1.97301	2089.31	46.4469	118.895	1.83341	0.635931	5204	3.26517	217.989	182.852	0.402304	0.411391	1.83897	0.838814
	0.297488	0.00040197	0.000236229	0.000416835	5.2306	0.000144151	3.83215	0.0248175	62.7908	2.23542	140.364	9.54642e-05	63.6454	2.2054	2626.32	47.86	97.4746	1.3693	0.694443	3030.79	2.97053	260.978	68.1791	0.381521	0.317432	2.06537	0.261244
	0.320358	0.000223026	0.000116643	0.000445625	2.83782	0.00014873	3.76942	0.0560948	114.064	2.19883	250.807	9.84967e-05	114.528	2.18993	2499.23	46.2456	170.348	1.95506	0.679199	10174.8	4.05171	239.681	261.761	0.436614	0.586156	2.11603	1.09212
	0.353121	0.000395268	0.000202464	0.000444349	2.88263	0.000159215	3.49255	0.0728432	104.04	2.03732	211.963	0.000105441	104.476	2.02882	2204.03	46.8026	145.096	1.53823	0.684535	5519.44	4.00299	227.458	213.586	0.396762	0.328001	2.09855	0.939013
	0.349406	0.000308515	0.000237663	0.000610997	3.5745	0.000190605	3.52673	0.0392396	84.6851	2.05726	174.219	0.000126228	85.2291	2.04413	2238.38	45.6441	127.736	1.63928	0.733192	8697.53	4.49637	218.454	161.256	0.456553	0.50688	2.53125	0.738169
	0.341835	0.000271128	0.000195788	0.000403338	2.06159	0.000177517	3.83686	0.0404523	159.882	2.23817	357.843	0.000117561	160.226	2.23336	2463.55	47.4936	275.384	1.43621	0.769567	20886.1	6.14866	257.314	533.234	0.460796	0.586899	2.57568	2.07231
	0.298757	0.000321194	0.000230501	0.000495971	1.36536	0.000164787	3.55974	0.065831	224.029	2.07652	465.199	0.000109131	224.24	2.07455	2435.22	47.4382	332.049	1.4688	0.713779	15971.4	6.26752	238.173	1035.99	0.423041	0.427188	2.22096	4.34972
	0.32013	0.000294953	0.00018674	0.000427159	6.14436	0.000161288	4.10205	0.0209503	57.1569	2.39286	136.769	0.000106813	58.2228	2.34906	2720.69	46.7826	101.352	1.51386	0.741043	5755.67	3.38912	266.924	60.0557	0.434144	0.515562	2.46143	0.224992
	0.358332	0.000262948	0.000185201	0.000474657	3.33461	0.000143009	3.93955	0.0266589	101.42	2.29807	233.071	9.47077e-05	101.988	2.28528	2466.09	47.665	163.437	1.61247	0.701233	8707.6	3.816	266.112	189.394	0.417619	0.498852	2.12322	0.711707
	0.334088	0.000270524	0.00015798	0.00045252	3.72956	0.000181451	3.87617	0.0438202	89.196	2.2611	201.681	0.000120166	89.8192	2.24541	2518.09	45.9335	152.171	1.69257	0.754515	11558.9	4.67192	243.153	166.101	0.46591	0.604488	2.64695	0.683115
	0.324677	0.000290533	0.000206572	0.000542327	1.80296	0.000159911	4.15932	0.0576669	198.202	2.42627	480.89	0.000105901	198.528	2.42228	2740.22	47.0925	362.711	1.63656	0.754248	21845.4	6.35667	274.247	719.313	0.438473	0.535115	2.51649	2.62286
	0.328138	0.000269193	0.000202493	0.000389055	3.62319	0.000148142	3.94766	0.0827915	93.5154	2.3028	215.347	9.81075e-05	94.1324	2.28771	2587.45	48.5586	156.66	1.38733	0.727473	8512.75	3.87016	276.751	162.769	0.423021	0.505307	2.20177	0.588144
	0.341183	0.000242579	0.00019841	0.000505828	5.16161	0.000181849	3.5387	0.0449822	58.7618	2.06424	121.299	0.00012043	59.541	2.03723	2274.37	45.8231	87.0618	1.65391	0.717748	6734.79	3.54158	220.918	79.0895	0.466647	0.612967	2.40682	0.358004
	0.283273	0.000283079	0.000169927	0.000478425	1.78324	0.000142766	3.69167	0.0783146	177.863	2.15347	383.024	9.4547e-05	178.15	2.15001	2581.24	47.3732	258.704	1.67798	0.675425	10723.9	4.79289	246.323	605.278	0.406651	0.435208	1.99415	2.45725
	0.314816	0.000257099	0.000267208	0.000471505	1.34027	0.000117324	3.11795	0.037351	199.899	1.8188	363.577	7.76982e-05	200.081	1.81715	2084.15	49.7903	215.101	1.39805	0.591624	6165.05	3.59153	229.814	809.06	0.36345	0.332825	1.38507	3.5205
	0.297508	0.000186574	0.000174105	0.000449593	0.828295	0.000162683	3.6328	0.0463055	376.912	2.11913	798.727	0.000107737	377.043	2.1184	2489.63	47.0189	567.358	1.74067	0.710327	46287.3	8.08799	238.784	3196.62	0.470618	0.74137	2.23893	13.3871
	0.305636	0.000304409	0.000231183	0.000328121	3.57158	0.000145907	3.55353	0.0426998	85.3984	2.07289	177.022	9.66273e-05	85.9461	2.05968	2407.13	49.4857	123.582	1.19732	0.698119	5115.13	3.38552	258.724	142.991	0.401131	0.396241	1.9524	0.552678
	0.32229	0.000272614	0.000202472	0.000444836	4.20295	0.000142314	4.02759	0.0673842	82.2101	2.34943	193.147	9.42479e-05	82.9376	2.32882	2662.82	48.1245	137.707	1.48909	0.712968	6804.96	3.48577	277.329	120.891	0.414769	0.48795	2.15316	0.435912
	0.317418	0.000317699	0.000199804	0.000439302	4.44159	0.000115041	4.05769	0.0458993	78.3579	2.36699	185.472	7.61863e-05	79.1311	2.34386	2702	49.0335	121.528	1.48641	0.655235	3425	2.64705	290.057	95.1509	0.362028	0.34065	1.75177	0.328042
	0.339155	0.000380739	0.000149187	0.000539073	5.66726	0.000170122	3.11552	0.0332064	47.0925	1.81739	85.5853	0.000112664	47.8424	1.7889	2008.55	43.9709	53.4257	1.98397	0.624239	1930.74	2.59542	179.093	49.6458	0.401537	0.320818	1.97715	0.277206
	0.324977	0.000372191	0.0001503	0.000507714	4.16893	0.000150505	3.02111	0.0423571	62.1711	1.76231	109.565	9.96721e-05	62.7125	1.7471	1989.47	45.1285	65.2482	1.92022	0.595521	1865.85	2.5375	182.931	84.0933	0.378415	0.283558	1.70829	0.4597
	0.338515	0.000213875	0.000202511	0.000384191	2.97905	0.000153658	3.84902	0.0182771	110.941	2.24526	249.092	0.00010176	111.438	2.23526	2483.83	48.5392	182.35	1.42622	0.732057	13338.3	4.3309	269.62	249.553	0.449304	0.644555	2.23138	0.925571
	0.331967	0.000260216	0.000185447	0.000403568	2.18635	0.000198647	3.48597	0.0657089	136.964	2.03348	278.514	0.000131554	137.295	2.02858	2271.82	46.6051	212.046	1.47704	0.761346	18421.5	6.03764	225.118	450.592	0.482069	0.621553	2.61797	2.00158
	0.300271	0.000340076	8.34879e-05	0.000534808	1.81299	0.000172634	3.68299	0.0424285	174.532	2.14841	374.966	0.000114327	174.822	2.14484	2514.1	42.4339	249.16	2.82299	0.664485	11505.3	5.6877	197.172	618.949	0.430846	0.437003	2.40555	3.13914
	0.33344	0.000307375	0.000155849	0.000418169	0.933649	0.000141399	3.5067	0.0304685	322.768	2.04558	660.248	9.36415e-05	322.911	2.04467	2280.29	47.35	432.587	1.66635	0.655188	16576.6	6.13837	233.753	2034.39	0.394247	0.37752	1.87828	8.70318
	0.333682	0.000309941	0.000153262	0.000549281	4.58388	0.000150154	4.5084	0.0492281	84.3481	2.6299	221.827	9.944e-05	85.2338	2.60257	2930.6	45.9152	163.853	1.89726	0.73865	8583.8	4.01177	282.588	116.321	0.42437	0.506059	2.53883	0.411627
	0.334459	0.000226536	0.000169001	0.000583035	2.97605	0.000182047	3.80045	0.0308799	109.652	2.21693	243.091	0.000120561	110.142	2.20707	2467.52	45.1808	179.157	1.95707	0.736996	15863.9	5.08594	230.653	264.998	0.482235	0.711871	2.61031	1.1489
	0.305335	0.000269251	0.000200313	0.000423197	3.36785	0.000160945	4.10012	0.075881	104.51	2.39174	249.96	0.000106586	105.107	2.37816	2778.59	47.8262	190.33	1.45796	0.761441	12096.2	4.63448	278.834	205.649	0.444452	0.570557	2.48662	0.737532
	0.34955	0.000350717	0.000213403	0.000423396	4.44175	0.000133789	3.88809	0.0408953	75.08	2.26805	170.285	8.86018e-05	75.8209	2.24589	2467.19	48.3432	116.126	1.42534	0.681948	3975.05	3.00923	270.162	95.5707	0.379515	0.343866	1.95209	0.353753
	0.328292	0.000273683	0.000172765	0.000451019	2.83646	0.00017814	3.53162	0.0477287	106.92	2.06011	220.266	0.000117974	107.354	2.05178	2314.23	46.369	158.904	1.61605	0.721416	10546.7	4.68705	225.76	254.545	0.452733	0.536024	2.37457	1.1275
	0.315954	0.000322996	0.000264875	0.000477375	1.63815	0.000142607	3.58246	0.00923378	187.898	2.08977	392.663	9.4442e-05	188.154	2.08693	2390.66	48.8529	269.307	1.34869	0.685846	10241.1	4.88469	254.202	673.622	0.393521	0.369822	1.93349	2.64994
	0.292322	0.000323155	0.000229216	0.000471058	3.39191	0.000154719	3.55343	0.0516982	89.931	2.07283	186.412	0.000102463	90.4517	2.0609	2453.21	47.7093	129.238	1.43375	0.693291	5366.28	3.67122	240.476	161.405	0.408283	0.396032	2.07154	0.671188
	0.341627	0.000409238	0.000304786	0.000420088	1.70181	0.00013803	3.86117	0.0392258	194.936	2.25235	439.064	9.14104e-05	195.222	2.24905	2479.95	49.8228	313.655	1.18461	0.714373	10070	5.10235	284.965	640.71	0.374811	0.304463	2.0168	2.24838
	0.32672	0.000228573	0.000154121	0.000388085	3.18744	0.000138351	4.48836	0.0430964	120.896	2.61821	316.531	9.16235e-05	121.515	2.60488	2948.05	48.348	236.424	1.59047	0.746922	14951.2	4.44018	311.934	245.307	0.433702	0.632828	2.34133	0.786409
	0.337519	0.000269107	0.000212793	0.000443123	2.59596	0.000149552	3.88331	0.0356107	128.475	2.26526	291.03	9.90413e-05	128.913	2.25758	2509.73	48.2696	210.059	1.45564	0.721778	11613.4	4.52413	269.009	313.278	0.424336	0.503558	2.19345	1.16456
	0.322478	0.000202529	0.000109032	0.000564107	2.57079	0.000138797	3.6306	0.0327738	121.292	2.11785	256.879	9.19187e-05	121.697	2.1108	2399.68	45.4466	162.613	2.32142	0.633035	8857.23	3.69428	222.946	300.492	0.426934	0.580606	1.90336	1.34782
	0.310911	0.000336258	0.000243853	0.000349037	0.848319	0.000166409	3.48499	0.0469627	353.04	2.03291	717.699	0.000110204	353.169	2.03217	2342.77	48.8283	524.437	1.20847	0.73072	25226.6	7.95416	247.037	2606.4	0.419575	0.403648	2.19699	10.5506
	0.30526	0.000252307	0.00017425	0.000423276	4.26558	0.000136282	3.45921	0.0368028	69.5679	2.01787	140.379	9.02531e-05	70.2018	1.99965	2344.5	47.8668	90.2703	1.56279	0.643047	3681.37	2.70261	235.648	97.1583	0.399811	0.433514	1.77046	0.412303
	0.290164	0.000324427	9.99273e-05	0.00038919	4.26978	0.000175801	3.79318	0.0555622	76.2091	2.21269	168.627	0.000116424	76.9048	2.19267	2626.72	43.766	117.916	2.22313	0.699271	6106.49	3.98454	216.02	116.978	0.439855	0.476889	2.5043	0.541513
	0.294887	0.000330052	0.000208861	0.000476658	1.53899	0.000143702	3.34688	0.0715148	186.858	1.95235	364.812	9.51672e-05	187.083	1.95001	2302.24	47.8061	237.583	1.51222	0.651246	7965.02	4.6232	227.418	703.149	0.388042	0.340766	1.82051	3.09188
	0.289335	0.000216869	0.000182419	0.000381184	2.18196	0.000194629	4.00338	0.042833	157.61	2.3353	368.067	0.000128893	157.989	2.32969	2775.52	47.1675	300.839	1.47326	0.817348	32890.5	7.04604	264.807	548.335	0.508771	0.839166	2.94576	2.0707
	0.311801	0.000246491	0.000281118	0.000477009	5.54632	0.000136784	4.03596	0.0546682	62.3442	2.35431	146.777	9.05854e-05	63.296	2.31891	2709.65	48.6123	103.413	1.40601	0.704558	5138.88	2.90332	283.568	69.2118	0.413763	0.516484	2.06068	0.244075
	0.330077	0.000267248	0.000101009	0.00050122	3.53229	0.000156105	4.20258	0.0326052	102.123	2.4515	250.354	0.00010338	102.763	2.43622	2746.58	44.7419	177.765	2.26063	0.710054	10635.1	4.3442	250.128	189.836	0.440418	0.571158	2.47072	0.758955
	0.35905	0.000305152	0.000183769	0.000401026	0.634764	0.000134164	3.86318	0.0673217	523.032	2.25352	1178.66	8.88501e-05	523.139	2.25306	2415.58	48.6631	811.531	1.48735	0.688518	33220.5	7.97735	271.996	4823.36	0.392152	0.397585	1.96381	17.7332
	0.322062	0.000232295	0.000213042	0.00045292	1.02651	0.000155923	3.73375	0.0576206	312.57	2.17802	680.784	0.000103261	312.737	2.17686	2469.38	48.0037	489.967	1.52007	0.719709	32056.8	7.20387	255.807	2015.07	0.44336	0.586463	2.20513	7.8773
	0.363423	0.000254839	0.000150174	0.000435359	4.89587	0.000110844	4.01487	0.0373935	70.3067	2.34201	164.659	7.34066e-05	71.1471	2.31434	2493.3	48.3661	103.802	1.70266	0.630409	3528.67	2.35715	279.236	79.1696	0.370214	0.40403	1.6666	0.283522
	0.307807	0.000207636	0.000192806	0.000408033	3.43529	0.000173946	3.31106	0.0344819	82.7362	1.93145	159.801	0.000115196	83.2275	1.92005	2235.87	47.145	112.044	1.52103	0.70115	8613	3.84309	218.805	167.44	0.466283	0.6456	2.1698	0.765248
	0.338413	0.000262223	0.00021133	0.000482773	5.7389	0.000158117	4.1963	0.0506603	62.6319	2.44784	153.313	0.000104713	63.6541	2.40853	2708.35	47.054	114.565	1.54095	0.747264	7470.65	3.53245	276.234	71.865	0.442597	0.582907	2.47413	0.26016
	0.308265	0.000340629	0.000196868	0.000449294	1.46186	0.000145277	4.14232	0.069289	243.477	2.41635	588.328	9.62096e-05	243.741	2.41374	2795.35	47.9432	429.835	1.52463	0.730604	18059.5	6.28662	283.085	1005.79	0.404623	0.413184	2.27813	3.55296
	0.326994	0.000270801	0.00016777	0.000478227	2.19969	0.000149309	3.35718	0.0542319	131.103	1.95836	256.746	9.88803e-05	131.424	1.95357	2204.17	46.9738	167.622	1.69005	0.652868	7616.33	4.03481	220.244	365.938	0.411503	0.43232	1.895	1.66151
	0.334216	0.000266357	0.000197367	0.000478922	4.04744	0.000125787	3.51256	0.0568474	74.4618	2.04899	152.572	8.33026e-05	75.0735	2.0323	2281.44	48.2311	95.7469	1.5738	0.627553	3370.14	2.56903	242.939	104.543	0.381302	0.385211	1.66079	0.430328
	0.324303	0.000287442	0.000124794	0.000495417	3.19749	0.000144389	3.38908	0.0705337	90.9987	1.97696	179.901	9.56216e-05	91.4673	1.96684	2234.02	45.6492	112.623	2.01343	0.62603	4381.77	3.19829	209.974	169.795	0.400085	0.396542	1.84499	0.808646
	0.339053	0.000342689	0.000188284	0.000479877	2.22217	0.000108828	4.16966	1e-05	161.183	2.4323	392.046	7.20715e-05	161.586	2.42624	2688.56	49.0075	254.067	1.61019	0.648054	6393.85	3.62064	297.745	378.779	0.349997	0.309252	1.7154	1.27216
	0.311642	0.000270022	0.000162858	0.000388213	1.57868	0.000177149	3.36721	0.0280089	183.265	1.96421	359.97	0.000117317	183.496	1.96173	2261.19	46.8079	255.615	1.54786	0.710099	16060.1	5.91157	219.344	777.924	0.449019	0.516557	2.25772	3.54659
	0.328742	0.000204829	0.000111141	0.000369757	4.55208	0.000141613	3.34418	0.0587975	63.0056	1.95077	122.91	9.37837e-05	63.6582	1.93078	2189.94	46.6711	77.1906	1.82408	0.628026	4074.6	2.59692	216.573	86.9645	0.421784	0.535777	1.77635	0.401548
	0.314188	0.00039887	0.000130574	0.00037266	1.10438	8.53289e-05	3.72712	0.0485272	290.012	2.17415	630.532	5.65092e-05	290.192	2.17281	2493.62	48.3741	337.98	1.99451	0.536024	3834.44	3.27426	259.309	1153.35	0.294251	0.186563	1.20451	4.44777
	0.289803	0.000245119	0.000264993	0.000442186	3.15969	0.000147234	3.90212	0.0336027	106.03	2.27623	241.349	9.75058e-05	106.563	2.26484	2703.53	48.9161	175.441	1.36448	0.726918	9772.09	4.07047	277.601	214.701	0.429036	0.546018	2.16639	0.773417
	0.348677	0.000287768	0.000207596	0.000490439	5.1897	0.000178843	3.88555	0.0862868	64.1703	2.26657	145.447	0.000118439	65.0304	2.2366	2468.89	46.3013	109.607	1.54524	0.753589	7755.88	3.90807	247.661	83.8729	0.455641	0.557901	2.59868	0.338661
	0.306795	0.000283494	0.000235548	0.000439671	1.35086	0.000161467	3.70544	0.0290784	235.702	2.16151	509.473	0.000106932	235.921	2.15951	2505.84	48.2711	373.714	1.37723	0.733531	20952.3	6.51516	256.704	1127.11	0.432809	0.493668	2.26533	4.39071
	0.349172	0.000306718	0.000293809	0.000493061	3.9676	0.00014123	3.72709	0.0464394	80.6048	2.17413	175.246	9.35296e-05	81.2413	2.1571	2366.4	48.8426	121.578	1.32574	0.693758	5152.8	3.25031	264.353	120.368	0.397536	0.398654	1.97919	0.455331
	0.281747	0.000235567	0.000205648	0.000557739	2.43047	0.000180636	3.30519	0.0539066	116.805	1.92803	225.203	0.000119626	117.154	1.92229	2315.94	45.8432	156.557	1.75656	0.69518	10764	4.71749	206.521	332.563	0.463838	0.591625	2.25587	1.61031
	0.302016	0.000323685	0.000175877	0.000434095	5.01629	0.000167063	3.56111	0.0382909	60.8561	2.07731	126.417	0.000110638	61.6191	2.05159	2424.84	46.2025	87.9973	1.59075	0.696086	4129.48	3.27105	226.013	76.3889	0.422886	0.424999	2.22671	0.337985
	0.339658	0.000284803	0.000143213	0.000470061	3.19562	0.000156844	3.72515	0.0429363	100.081	2.173	217.476	0.00010387	100.596	2.16188	2399.74	46.1106	150.271	1.81957	0.690975	7910.21	4.01306	235.485	198.828	0.425731	0.477853	2.20289	0.844334
	0.35926	0.000262666	0.00022458	0.000474124	0.638784	0.000144711	3.56975	0.0438133	480.263	2.08235	1000.08	9.58354e-05	480.363	2.08192	2231.37	48.3542	683.068	1.48732	0.683014	34712.1	7.89416	248.156	4636.11	0.413094	0.460365	1.95731	18.6822
	0.307208	0.00033561	0.000145135	0.000521057	3.19279	0.000139351	3.6028	0.0363841	96.88	2.10163	203.606	9.22851e-05	97.3775	2.0909	2434.98	46.0084	130.125	1.93249	0.639101	4220.6	3.31788	226.742	174.546	0.385744	0.348455	1.89293	0.769801
	0.303677	0.000296953	0.000177782	0.00039234	5.26795	0.000150427	3.79398	0.0239341	61.7222	2.21316	136.601	9.96204e-05	62.5741	2.18303	2577.26	47.3539	95.3921	1.49577	0.698327	4319.29	3.06657	252.944	72.0666	0.413203	0.443849	2.13342	0.284911
	0.34635	0.000196829	0.000211174	0.000488221	4.7406	0.00016384	3.6144	0.0380942	65.3769	2.1084	137.841	0.000108503	66.1104	2.08501	2304.81	46.5324	96.4736	1.70625	0.699891	7836.42	3.35888	232.683	95.3603	0.464271	0.69659	2.21932	0.40983
	0.327725	0.000335455	0.000186325	0.000433706	4.12197	0.000155318	3.13879	0.0483247	65.3313	1.83096	119.619	0.00010286	65.8876	1.8155	2058.55	46.7617	76.4383	1.54663	0.639015	2792.96	2.83432	204.061	93.4231	0.39554	0.337383	1.83194	0.45782
	0.305032	0.000368933	0.000202506	0.000455549	3.82844	0.000132263	3.36818	0.0461549	75.4988	1.96477	148.338	8.75914e-05	76.0543	1.95042	2283.56	47.7192	92.5208	1.52831	0.623717	2366.61	2.65539	228.034	106.827	0.363423	0.280645	1.67594	0.468469
	0.350566	0.000199197	0.000222437	0.000513976	3.11579	0.000182225	4.07382	0.0521117	112.259	2.3764	266.771	0.000120679	112.808	2.36483	2581.01	46.2906	208.616	1.73788	0.782004	23670.5	5.49356	259.541	269.653	0.501862	0.868288	2.79963	1.03896
	0.336528	0.000361799	0.000121224	0.000286892	3.61003	0.000187888	3.64351	0.0651808	86.6257	2.12538	184.112	0.000124429	87.1932	2.11155	2358.27	44.5194	132.86	1.88876	0.721624	7404.64	4.5203	214.702	158.087	0.441914	0.44012	2.57746	0.736308
	0.362472	0.000242302	0.000257924	0.000436276	3.15696	0.000184449	4.07887	0.0331604	110.929	2.37934	263.938	0.000122152	111.486	2.36746	2536.83	47.751	214.326	1.36999	0.812032	21545	5.63618	276.518	254.458	0.485604	0.723335	2.83694	0.920223
	0.343461	0.000219621	0.000191958	0.000433729	4.46332	0.000127639	3.31188	0.0553856	63.6431	1.93193	122.954	8.45292e-05	64.2771	1.91287	2121.23	48.325	75.5546	1.5595	0.614495	3170.55	2.31572	229.951	83.7386	0.394198	0.446207	1.58621	0.364158
	0.310944	0.000219654	0.000141021	0.000488204	5.72431	0.000123254	3.19618	0.0238028	47.827	1.86444	89.1706	8.16249e-05	48.6038	1.83464	2148.51	46.6915	50.9504	1.8901	0.571381	1749.19	1.8363	207.169	47.6623	0.383421	0.413193	1.46907	0.230064
	0.35297	0.0003601	0.000168144	0.000516642	3.81707	0.000191372	3.40107	0.0725353	76.464	1.98396	151.701	0.000126736	77.0234	1.96955	2146.8	44.7023	107.141	1.78817	0.706259	5972.86	4.13453	202.066	131.423	0.44014	0.420109	2.44871	0.650397
	0.35703	0.000350156	0.00020935	0.000412318	3.3831	0.000151897	3.59479	0.0403456	91.2151	2.09696	191.275	0.000100594	91.7405	2.08495	2254.84	47.7602	132.299	1.42506	0.691672	5447.03	3.64669	243.794	160.417	0.39903	0.363014	2.05749	0.658
	0.337563	0.000277566	0.000131793	0.000447645	2.36145	0.000146607	3.65787	0.0511664	133.051	2.13376	283.898	9.70905e-05	133.426	2.12776	2363.88	46.4177	189.407	1.85941	0.667166	8848.42	4.21137	234.322	346.916	0.412699	0.451077	2.0266	1.48051
	0.324214	0.000156827	0.000190793	0.000476267	3.55432	0.00014894	4.08034	0.0331799	98.536	2.3802	234.535	9.86355e-05	99.162	2.36517	2690.03	46.81	167.685	1.92943	0.714967	15668.3	4.02558	265.822	196.634	0.475752	0.901551	2.28857	0.739721
	0.301729	0.00021397	0.000128887	0.000414839	4.05724	0.000132836	3.78109	0.0306155	79.9601	2.20564	176.363	8.79709e-05	80.62	2.18758	2575.68	47.3171	115.765	1.79945	0.656401	5695.49	2.98315	251.692	122.021	0.415453	0.545088	1.88787	0.484801
	0.332669	0.00025316	0.000277811	0.000490826	2.72864	0.000146813	3.48128	0.0340489	109.567	2.03075	222.502	9.7227e-05	109.978	2.02314	2266.38	48.449	151.191	1.42503	0.679503	7643.39	3.76789	242.955	249.363	0.416324	0.470906	1.92967	1.02637
	0.372852	0.000203825	0.000310007	0.000497996	1.23866	0.000152593	4.1269	0.0341245	286.298	2.40736	689.222	0.000101055	286.521	2.40548	2524.91	48.2771	518.777	1.55037	0.752699	44495.4	7.2543	285.972	1584.4	0.459269	0.722801	2.38467	5.54039
	0.344586	0.00024808	0.000220071	0.000407213	2.7745	0.00014658	3.93949	0.0526146	121.935	2.29804	280.212	9.70729e-05	122.409	2.28914	2518.88	48.8806	204.178	1.38437	0.728655	12202.9	4.3717	279.853	280.649	0.428115	0.54287	2.17992	1.00284
	0.35181	0.000320573	0.000171168	0.000431486	4.25947	0.00014066	4.23243	0.0361041	85.2407	2.46892	210.452	9.31524e-05	86.0152	2.44669	2676.35	47.4234	150.672	1.60942	0.715943	6693.84	3.60378	283.004	120.209	0.403134	0.430886	2.23584	0.424762
	0.291686	0.000184101	8.73843e-05	0.000504688	3.43614	0.000106366	3.96357	0.0573626	99.0167	2.31208	228.935	7.04413e-05	99.6049	2.29843	2738.82	46.6123	135.781	2.42408	0.593102	5091.13	2.58699	256.038	166.353	0.387184	0.53299	1.58828	0.649722
	0.334553	0.000281493	0.000128679	0.000452108	2.11437	0.000146776	3.02995	0.038482	123.104	1.76747	217.583	9.72024e-05	123.382	1.76348	1966.99	46.0191	131.095	1.89684	0.602507	4953.69	3.50767	190.779	344.6	0.396666	0.369059	1.68158	1.80628
	0.3129	0.000349684	0.000163372	0.000437631	3.43629	0.000187968	3.81745	0.0671469	95.3621	2.22685	212.357	0.000124482	95.9286	2.21369	2558.85	45.428	160.141	1.69596	0.754111	9552.78	4.96485	234.227	185.923	0.449335	0.477601	2.7033	0.793771
	0.376528	0.000303998	0.000158825	0.000470059	3.37883	0.000117275	3.64054	0.0879768	92.4933	2.12365	196.424	7.76654e-05	93.0247	2.11152	2214.29	47.8622	120.392	1.73015	0.612921	3562.11	2.68581	247.953	147.588	0.361587	0.32694	1.60876	0.595224
	0.312484	0.000274462	0.000267912	0.000516707	0.333391	0.000155571	4.39791	0.0515169	1133.71	2.56545	2908.46	0.000103027	1133.77	2.5653	2949.72	48.3815	2287.64	1.45353	0.786546	147761	15.5308	306.072	22471.9	0.44269	0.58361	2.59274	73.4203
	0.344066	0.000320875	0.00020389	0.000504911	3.87484	0.000167598	3.81557	0.0796615	84.5001	2.22575	188.076	0.000110992	85.1369	2.2091	2441.58	46.6076	137.26	1.57366	0.729811	7596	4.09837	246.428	140.179	0.431265	0.463114	2.40534	0.568842
	0.312337	0.000259069	9.36534e-05	0.000462233	0.975677	0.000122174	3.4252	0.0849387	301.683	1.99803	602.773	8.09103e-05	301.829	1.99707	2297.8	45.9737	352.258	2.27523	0.584396	10990.3	4.78611	215.239	1741.95	0.377429	0.378004	1.58513	8.09308
	0.338625	0.000366256	0.000153096	0.000394606	3.60557	0.000167681	3.5881	0.0293458	85.4145	2.09306	178.778	0.000111047	85.9727	2.07947	2315.07	45.6706	124.074	1.73487	0.694011	5513.98	3.89848	222.513	146.629	0.415183	0.382113	2.26532	0.65897
	0.310937	0.000311552	0.000172514	0.000496453	3.27917	0.00014653	3.85182	0.0413954	100.842	2.24689	226.581	9.70396e-05	101.388	2.23479	2589.27	46.8825	156.433	1.69972	0.690406	6615.8	3.82526	251.713	186.557	0.40683	0.421864	2.12743	0.74115
	0.295475	0.00030612	0.0001283	0.000368662	3.57121	0.00018274	3.5554	0.0347717	85.4523	2.07398	177.227	0.00012102	86.0003	2.06077	2443.64	45.2164	126.552	1.79513	0.714066	7361.8	4.2908	216.121	159.98	0.44846	0.493754	2.44656	0.740235
	0.296085	0.000277416	0.000170655	0.000382721	2.21627	0.000142775	3.64018	0.0663943	141.09	2.12344	299.597	9.45528e-05	141.441	2.11817	2499.74	48.1854	204.301	1.50259	0.68192	8810.66	4.25949	251.287	386.577	0.406987	0.437543	1.96474	1.53839
	0.330028	0.000264471	0.000131119	0.000415052	6.02932	0.000130211	3.00053	0.0260984	42.6124	1.75031	74.5849	8.62324e-05	43.3783	1.71941	1961.13	46.3828	42.1243	1.7932	0.564783	1281.39	1.76394	191.925	39.3797	0.374641	0.339772	1.45452	0.205183
	0.304143	0.000237023	0.000123634	0.000401642	4.76344	0.000117033	3.34242	0.03784	60.1662	1.94975	117.309	7.75055e-05	60.8476	1.92791	2268.99	47.5	68.1136	1.80583	0.580635	2078.35	2.01603	224.216	70.0142	0.372185	0.382072	1.46585	0.312263
	0.361374	0.000260624	0.000201161	0.000441515	3.25098	0.000147629	3.38149	0.0714465	89.2979	1.97254	176.144	9.77672e-05	89.7732	1.9621	2106.72	47.891	116.836	1.49484	0.663302	5802.49	3.33066	230.587	168.89	0.412332	0.446083	1.88184	0.732435
	0.359939	0.000321364	0.000238011	0.000439696	2.42059	0.000133742	3.86285	0.0409062	137.07	2.25333	308.864	8.85712e-05	137.476	2.24668	2412.02	49.1757	214.257	1.35921	0.693693	8328.18	4.08609	277.732	326.912	0.386964	0.375277	1.9521	1.17708
	0.282298	0.000262019	0.000159774	0.000486576	4.04966	0.000137921	3.45094	0.0474796	73.1154	2.01305	147.185	9.13382e-05	73.7167	1.99663	2416.2	46.9371	93.2944	1.74848	0.633858	3559.46	2.78053	226.042	107.403	0.399165	0.421827	1.78904	0.475147
	0.326475	0.000307418	0.000244455	0.000392968	2.93283	0.000135513	4.0236	0.0479858	117.805	2.3471	276.499	8.9744e-05	118.316	2.33696	2643.75	49.7074	199.041	1.26793	0.719863	8285.24	3.99048	295.58	237.201	0.395935	0.41347	2.05744	0.802494
	0.302715	0.000165252	0.000158746	0.000430185	3.29578	0.000165167	3.55739	0.060276	92.6633	2.07515	192.29	0.000109382	93.1701	2.06386	2419.88	46.4874	134.309	1.82209	0.698472	12312	3.99529	228.57	202.319	0.482581	0.827934	2.2146	0.885151
	0.317748	0.000317768	0.000226583	0.00046929	2.75715	0.00016463	3.83914	0.0475053	119.578	2.2395	267.796	0.000109027	120.037	2.23094	2555.24	47.5741	198.694	1.43963	0.741961	10657	4.84366	258.341	277.906	0.42958	0.463903	2.38611	1.07574
	0.312022	0.000285225	0.000254637	0.000437867	5.2785	0.000187787	3.89335	0.0710984	63.2115	2.27112	143.561	0.000124362	64.0873	2.24008	2613.07	47.1794	113.049	1.32764	0.787462	8593.4	4.16745	257.66	83.391	0.467808	0.591946	2.73289	0.323647
	0.337909	0.000339564	0.000173151	0.000412016	1.31024	0.000168917	3.45261	0.0704198	226.429	2.01402	456.033	0.000111866	226.627	2.01227	2230.06	46.6093	318.905	1.58723	0.699301	15389.9	6.29615	223.003	1085.9	0.421006	0.401769	2.20827	4.86945
	0.329316	0.00024143	8.48289e-05	0.00045863	1.68488	0.000157988	4.4156	0.0659721	225.169	2.57577	579.984	0.000104628	225.493	2.57207	2889.08	44.7519	425.787	2.37286	0.734136	30611.9	6.80444	262.924	912.95	0.457758	0.675547	2.63998	3.47229
	0.340867	0.000249381	0.000172642	0.000489569	3.91644	0.000143803	3.75335	0.0449958	82.2364	2.18946	180.053	9.52335e-05	82.8694	2.17273	2413.49	47.1211	122.043	1.70382	0.677818	6329.79	3.31585	247.781	131.044	0.418721	0.502861	2.02986	0.528871
	0.379341	0.000326808	0.000198225	0.000406128	4.60601	0.00016332	3.47091	0.0436331	64.6242	2.0247	130.844	0.000108159	65.3092	2.00346	2101.59	47.0804	90.6809	1.44569	0.693044	4516.22	3.24614	228.739	86.8531	0.41558	0.401851	2.12574	0.379704
	0.305252	0.000180774	0.000203196	0.000470456	4.30914	0.000178571	3.57357	0.019416	71.1388	2.08458	148.295	0.000118259	71.8001	2.06539	2422.05	46.1066	106.858	1.74606	0.720578	10387.2	3.85288	225.864	121.11	0.492363	0.818872	2.39609	0.536205
	0.350312	0.000295161	0.000126835	0.000528395	4.87318	0.000149673	3.50437	0.0406957	61.6541	2.04422	126.034	9.91215e-05	62.3844	2.02029	2221.1	45.0057	80.2689	2.05866	0.63688	3419.23	2.79891	211.039	76.5983	0.406557	0.411186	1.96449	0.362958
	0.32327	0.000375016	0.000150508	0.000515685	1.58525	0.000182615	3.75877	0.0452613	203.728	2.19262	446.697	0.000120937	203.987	2.18983	2481.49	44.7288	325.151	1.93339	0.7279	16959.9	6.87305	223.582	837	0.436402	0.427991	2.59799	3.74358
	0.375163	0.000207276	0.000167989	0.00044641	0.829166	0.000141788	3.69856	0.0884648	383.332	2.15749	827.034	9.38994e-05	383.465	2.15674	2254.5	47.8326	562.96	1.69378	0.680697	36567.8	7.02182	251.592	2979.45	0.431754	0.592145	1.98669	11.8424
	0.304353	0.000337537	0.000159491	0.000430011	5.11043	0.000187712	2.58097	0.0363975	43.2898	1.50557	65.1757	0.000124313	43.8527	1.48624	1751.56	44.6489	39.5549	1.69515	0.606895	1577.8	2.46413	152.976	52.5534	0.416705	0.331742	1.81249	0.34354
	0.33659	0.000265792	0.000194819	0.000438313	4.77769	0.000129732	3.95967	0.0451251	71.0635	2.30981	164.143	8.59151e-05	71.8731	2.28379	2562.67	48.4175	111.324	1.50669	0.678211	4713.94	2.85701	275.982	87.7607	0.396171	0.447405	1.92484	0.317994
	0.295703	0.000334794	0.000172992	0.000346954	4.83726	0.000129971	3.91527	0.0197081	69.3973	2.28391	158.497	8.60735e-05	70.2073	2.25755	2690.1	48.1629	106.411	1.48582	0.671377	3324.64	2.79841	270.025	80.7053	0.377742	0.351759	1.90624	0.29888
	0.288548	0.000273859	0.000199026	0.000404351	3.81902	0.000166431	3.48905	0.00272112	78.4016	2.03528	159.569	0.000110219	78.9757	2.02048	2421.61	47.4914	113.089	1.42625	0.708715	6214.51	3.69416	233.967	133.349	0.435777	0.492836	2.18465	0.569948
	0.324985	0.000279752	0.000158028	0.000509509	4.66933	0.000182748	3.35724	0.0350897	61.6565	1.95839	120.748	0.000121025	62.3279	1.9373	2210.8	45.0502	83.2936	1.79578	0.689816	5160.7	3.48121	202.579	88.5872	0.450414	0.507944	2.30007	0.437297
	0.277716	0.000254978	0.00022949	0.000408721	2.86835	0.000123206	3.41696	0.0120555	102.296	1.99323	203.899	8.15932e-05	102.721	1.98499	2407.69	49.736	129.06	1.35702	0.632961	4243.87	2.92145	251.304	201.79	0.379349	0.384969	1.58884	0.802971
	0.343949	0.00027952	0.000245626	0.000532982	3.11099	0.000159727	3.78104	0.0424274	104.352	2.20561	230.159	0.000105779	104.861	2.1949	2419.92	47.4128	166.277	1.52238	0.722443	9721.23	4.29897	252.709	216.391	0.432581	0.503406	2.27764	0.856284
	0.306013	0.000330944	0.000141509	0.000447418	3.62364	0.00021802	2.9058	0.0416097	68.8264	1.69505	116.664	0.000144384	69.2806	1.68394	1967.29	43.7756	79.633	1.84531	0.682583	4897.46	4.06083	165.557	131.143	0.463146	0.445254	2.38515	0.792132
	0.232109	0.000295108	0.000141723	0.000446085	3.37093	0.000170812	3.90221	0.0499143	99.3744	2.27629	226.205	0.000113121	99.9427	2.26335	2923.23	45.7541	165.607	1.79694	0.732111	8909.01	4.58806	242.879	195.661	0.445126	0.52581	2.51167	0.80559
	0.349636	0.000264633	0.000198961	0.000516554	2.52456	0.000135814	3.42981	0.0468828	116.685	2.00072	233.455	8.9943e-05	117.061	1.9943	2176.1	47.7204	149.206	1.64102	0.639121	6155.45	3.46265	232.218	272.924	0.395817	0.410799	1.75965	1.17529
	0.334724	0.000282172	0.000152839	0.000469914	1.68601	0.000146128	3.38402	0.0555964	172.45	1.97401	340.418	9.67736e-05	172.698	1.97118	2196.28	46.8024	220.05	1.75578	0.646412	9356.85	4.52445	220.388	617.601	0.404607	0.409718	1.87133	2.80234
	0.363323	0.00027477	0.000123023	0.000414909	5.48912	0.000155455	2.91462	0.0784097	45.4947	1.70019	77.3499	0.000102951	46.1753	1.67513	1810.31	45.2145	45.9279	1.87175	0.593768	1921.17	2.19895	177.156	49.8908	0.404479	0.380386	1.69179	0.281621
	0.299068	0.000209521	0.000148234	0.000513028	3.12067	0.000134409	3.69098	0.068286	101.549	2.15307	218.643	8.90128e-05	102.048	2.14256	2523.88	46.8786	141.548	1.93101	0.647392	7062.01	3.33774	241.162	203.014	0.418341	0.551663	1.87091	0.841816
	0.299876	0.000321693	7.32487e-05	0.000443715	1.29144	0.000150885	3.32149	0.0387956	221.002	1.93753	428.2	9.99236e-05	221.189	1.9359	2268.61	42.9002	255.494	2.88555	0.596671	8695.96	5.03392	181.748	1019.43	0.399128	0.364439	1.89766	5.60903
	0.308153	0.000302075	0.000160331	0.000470703	0.1	0.000127757	3.32522	0.0635101	2857.82	1.93971	5543.35	8.46071e-05	2857.83	1.9397	2244.31	47.6118	3381.1	1.72115	0.609938	98954.5	15.5054	224.113	158766	0.372158	0.329263	1.60995	708.42
	0.328652	0.000231782	0.000223102	0.000443016	4.40774	0.000181182	3.21441	0.0421713	62.5519	1.87507	117.289	0.000119988	63.1599	1.85702	2105.23	46.7914	81.9221	1.47512	0.698462	6034.91	3.42283	209.243	97.6608	0.461909	0.582625	2.18586	0.466734
	0.316615	0.000324216	0.000274612	0.000423744	5.23107	0.000163089	4.15527	0.0518802	68.0792	2.42391	165.018	0.000108006	69.0059	2.39136	2770.24	48.354	128.236	1.24381	0.777101	7126.04	3.85477	288.856	83.4135	0.430551	0.482807	2.53373	0.288772
	0.291841	0.000283065	0.000166316	0.000441837	1.80934	0.000178235	3.54674	0.0282246	168.415	2.06893	348.438	0.000118036	168.694	2.06551	2450.26	46.3704	252.283	1.63144	0.724039	15512.8	5.90891	226.741	626.085	0.450734	0.522002	2.39173	2.76124
	0.289519	0.000215094	0.00019205	0.00046883	6.34925	0.000122695	3.44846	0.086529	46.4873	2.0116	93.514	8.12548e-05	47.4113	1.9724	2390.18	47.7048	56.4756	1.64982	0.603926	2082.71	1.92454	233.328	42.3799	0.389344	0.451576	1.57222	0.181632
	0.325191	0.000218625	0.000276506	0.000374176	5.49855	0.000175268	3.63909	0.0489527	56.7051	2.1228	120.374	0.000116071	57.5563	2.09141	2395.66	48.2192	90.4345	1.25108	0.75128	7591.62	3.47889	251.565	72.1282	0.46997	0.672948	2.38141	0.286718
	0.353269	0.000207246	0.000284631	0.000449722	3.67767	0.000160413	4.11088	0.0537414	95.9353	2.39801	230.054	0.000106234	96.5873	2.38183	2593.65	48.2058	176.407	1.44906	0.766806	15672.7	4.44702	284.021	181.819	0.467557	0.739954	2.48223	0.640162
	0.367688	0.000310424	0.000233357	0.000553802	0.406247	0.00018289	4.31117	0.0550311	912.035	2.51485	2293.63	0.000121119	912.111	2.51464	2659.36	46.7997	1873.31	1.55714	0.816747	152431	16.5222	280.736	15631.9	0.466445	0.594633	2.98784	55.6818
	0.318835	0.000236883	0.000131847	0.000432223	3.1742	0.000187458	3.60033	0.0635061	97.3815	2.10019	204.52	0.000124144	97.8758	2.08958	2392.47	45.4407	149.683	1.81064	0.731876	12496.4	4.78697	221.029	219.434	0.479633	0.663693	2.54481	0.992784
	0.382561	0.000355487	0.000243696	0.000523379	3.2405	0.000139722	4.19039	0.0598329	111.018	2.4444	271.371	9.25312e-05	111.605	2.43154	2524.07	48.2063	196.224	1.46551	0.723083	8257.46	4.08519	289.521	201.04	0.393522	0.383585	2.20718	0.694388
	0.288583	0.000333615	9.57539e-05	0.000452654	3.3197	0.000151247	3.66063	0.033463	94.664	2.13537	202.142	0.000100164	95.1892	2.12359	2540.58	43.9815	129.663	2.42045	0.641445	4710.26	3.59473	210.53	171.592	0.403552	0.386411	2.08664	0.815047
	0.322433	0.000157171	0.000229928	0.000364817	1.51588	0.000141979	3.88931	0.000437031	220.455	2.26876	500.159	9.40257e-05	220.711	2.26612	2570.85	49.1784	359.044	1.50236	0.71786	30698.1	5.61524	279.666	1000.7	0.461057	0.821627	2.09025	3.5782
	0.325588	0.000322615	0.000168674	0.000408027	2.23962	0.000139196	3.36294	0.0385935	128.984	1.96171	253.03	9.21826e-05	129.312	1.95675	2212.57	47.5702	161.659	1.5887	0.638892	5423.75	3.694	226.259	329.765	0.383765	0.338856	1.76951	1.45747
	0.345351	0.000241838	0.000158841	0.000488144	3.51286	0.000138873	4.60045	0.083175	112.411	2.6836	301.666	9.19689e-05	113.109	2.66705	2938.06	47.4064	223.975	1.7705	0.742459	13911.3	4.33799	307.391	205.882	0.431535	0.614699	2.40625	0.669771
	0.255233	0.000262397	0.000180806	0.000446576	3.5294	0.000138488	4.11259	0.0333413	100.018	2.39901	239.945	9.17136e-05	100.645	2.38408	2988.05	48.039	170.445	1.57658	0.710348	7725.32	3.77376	282.177	175.147	0.41455	0.505025	2.14498	0.620701
	0.381338	0.000268126	0.000167656	0.000341383	2.99578	0.00014421	3.89631	0.0781352	111.676	2.27285	253.823	9.55033e-05	112.182	2.26261	2351.57	48.5241	181.052	1.43624	0.713298	10066.9	4.05012	272.763	231.862	0.417038	0.488434	2.11981	0.850049
	0.340509	0.000185188	0.000115445	0.000513621	5.10557	0.0001209	3.23225	0.0679511	54.2654	1.88548	102.316	8.00664e-05	54.9697	1.86132	2079.53	46.0964	57.5769	2.18882	0.562733	2368.41	1.9148	204.2	62.4183	0.394446	0.487726	1.46198	0.305671
	0.317074	0.000337675	0.000138986	0.000355641	4.61977	0.000153448	3.49841	0.0492517	64.9413	2.04074	132.528	0.000101621	65.6338	2.01921	2330.75	45.9768	87.283	1.74138	0.6586	3321.86	2.99225	219.87	83.9272	0.400818	0.368284	2.01295	0.381713
	0.318101	0.00021238	0.000231959	0.000441112	3.98909	0.00010918	3.7719	0.0301567	81.1331	2.20028	178.515	7.23048e-05	81.7807	2.18285	2509.18	49.8364	111.768	1.4963	0.626099	4028.84	2.40921	278.53	114.301	0.377078	0.450397	1.54832	0.410372
	0.302251	0.000280289	0.000198714	0.000396535	2.69194	0.000152465	4.07157	0.0235379	129.894	2.37508	308.509	0.00010097	130.369	2.36642	2771.49	48.3952	230.788	1.41263	0.748076	12701.2	4.83446	283.521	308.759	0.428962	0.516649	2.34399	1.08902
	0.293615	0.000214892	0.000225042	0.000456098	6.07147	0.000170763	3.2495	0.0572755	45.8254	1.89554	86.864	0.000113088	46.6603	1.86163	2239.29	46.4978	58.604	1.53867	0.674664	3883.53	2.72853	208.881	51.0002	0.454351	0.593753	2.06528	0.244159
	0.29949	0.000327597	0.000185237	0.000367164	3.40078	0.000157066	3.69481	0.0538396	93.2647	2.15531	201.014	0.000104017	93.8075	2.14284	2524.98	47.6051	142.865	1.44465	0.710722	6320.38	3.91846	248.953	169.064	0.413453	0.412352	2.18656	0.679102
	0.324806	0.000359172	0.000111536	0.000384019	3.81515	0.000164481	3.5643	0.0462442	80.1741	2.07917	166.696	0.000108928	80.76	2.06409	2347.77	44.2182	110.525	2.1447	0.663032	4533.31	3.60925	207.202	129.087	0.412104	0.379386	2.20565	0.623004
	0.37538	0.000227439	0.000185893	0.00041811	3.94389	0.000161611	2.87521	0.0665313	62.5563	1.6772	104.92	0.000107027	63.0445	1.66422	1752.01	47.0747	65.9167	1.53092	0.628259	3822.64	2.73866	189.435	101.335	0.42865	0.474629	1.74732	0.534932
	0.325561	0.000228491	0.000196073	0.000485824	5.57621	0.000149729	3.31537	0.0348012	50.9369	1.93397	98.5104	9.91581e-05	51.7228	1.90458	2181.36	46.7523	63.2919	1.64578	0.64249	3276.33	2.48628	215.454	57.4345	0.422528	0.500927	1.85267	0.266574
	0.377322	0.000221482	0.000126074	0.000401162	3.87366	0.000195818	3.49209	0.0599104	77.3599	2.03705	157.586	0.000129681	77.9425	2.02182	2121.29	45.2626	115.496	1.78401	0.732908	11835.5	4.39247	212.707	146.816	0.493222	0.717461	2.57211	0.690224
	0.312235	0.00024755	0.00016138	0.000508096	2.97857	0.000183856	4.14371	0.0793236	119.455	2.41717	288.742	0.000121759	119.989	2.4064	2780.24	45.7657	226.195	1.79323	0.783383	19979.9	5.77152	258.04	289.742	0.484407	0.717335	2.87433	1.12286
	0.322389	0.000252093	0.000154705	0.000460315	4.49017	0.000115554	3.90789	0.0832739	74.6454	2.2796	170.162	7.65258e-05	75.3979	2.25685	2583.3	48.0987	107.56	1.72774	0.632104	3666.44	2.50139	268.798	93.397	0.377126	0.415208	1.69426	0.347462
	0.348738	0.000327976	0.000195081	0.000456375	0.967398	0.000131019	3.63639	0.0519213	323.026	2.12123	685.212	8.67674e-05	323.18	2.12022	2310.35	48.3387	449.251	1.53636	0.655638	15007.8	5.79628	252.626	1880.67	0.377333	0.339947	1.80471	7.44449
	0.301396	0.000193533	1.80886e-05	0.000476275	2.07954	0.000144539	3.22754	0.0755506	133.33	1.88273	251.025	9.57211e-05	133.622	1.87862	2199.66	38.2386	128.719	6.58006	0.512773	5785.02	3.42276	140.311	411.06	0.429672	0.563131	1.76407	2.92963
	0.373556	0.000191753	0.000179903	0.000448925	4.06436	0.000170542	3.52996	0.0596662	74.5181	2.05914	153.443	0.000112942	75.1352	2.04223	2157.27	46.4793	108.315	1.70352	0.705893	10018.3	3.70464	226.728	129.677	0.474598	0.729009	2.26271	0.571948
	0.366811	0.000301376	9.37859e-05	0.000396575	4.46839	0.00018312	3.18821	0.0811961	61.1967	1.85979	113.813	0.000121272	61.8078	1.8414	1969.39	43.2748	73.6004	2.26466	0.646679	4140.63	3.27905	177.515	89.74	0.439839	0.449071	2.19067	0.505536
	0.338525	0.000251156	0.000216034	0.000431025	2.57131	0.000173704	3.91594	0.0456111	130.799	2.2843	298.783	0.000115036	131.236	2.27669	2526.97	47.6675	230.488	1.43937	0.771422	18373	5.50435	264.545	352.46	0.464467	0.631991	2.56926	1.33233
	0.331935	0.000282247	0.000212609	0.000430548	3.59715	0.000171192	3.28764	0.065148	78.4456	1.91779	150.442	0.000113372	78.9559	1.9054	2142.67	47.2579	104.494	1.42649	0.694577	5895.77	3.65258	218.298	141.194	0.434291	0.463851	2.11915	0.646795
	0.355521	0.000352675	0.000213639	0.0004755	5.37933	0.000177813	3.39773	0.0516597	54.1247	1.98201	107.276	0.000117757	54.903	1.95391	2136.24	46.0557	74.943	1.49953	0.698602	3752.77	3.21293	214.276	63.5662	0.424463	0.395397	2.25716	0.296655
	0.314263	0.000270021	0.000169006	0.000537729	3.39815	0.000118702	3.68908	0.0513969	93.1922	2.15196	200.546	7.86103e-05	93.7337	2.13953	2467.9	47.6969	124.052	1.79457	0.61857	3886.35	2.75949	249.526	152.719	0.373482	0.3775	1.64994	0.612038
	0.296307	0.000301474	0.000208169	0.000482401	0.720922	0.000163297	3.35258	0.0302144	399.651	1.95567	781.585	0.000108144	399.757	1.95515	2301.51	47.2426	536.911	1.52418	0.686951	25288	7.89771	222.467	3488.35	0.421554	0.425059	2.07421	15.6803
	0.304466	0.000319529	0.000168037	0.000437539	3.52461	0.000146704	3.32305	0.059398	80.9266	1.93845	156.872	9.7155e-05	81.4322	1.92641	2254.8	46.8914	100.634	1.63544	0.641506	3549.98	3.07175	217.241	134.555	0.393069	0.354992	1.83604	0.61938
	0.342779	0.000151423	0.000170478	0.000564491	3.46949	0.000165958	3.77938	0.0507497	93.5055	2.20464	206.146	0.000109906	94.0717	2.19137	2423.17	44.8975	143.637	2.30807	0.696772	15774.7	4.15147	226.508	200.155	0.498114	0.963962	2.36268	0.883656
	0.286851	0.000248289	9.182e-05	0.000437072	1.06986	0.000132421	3.49238	0.0348824	280.516	2.03722	571.473	8.76958e-05	280.679	2.03604	2429.7	45.7807	349.592	2.23221	0.611737	13086.9	5.16782	217.623	1556.89	0.397814	0.435835	1.75159	7.15409
	0.340458	0.000328678	0.000200556	0.000368311	2.86857	0.000154256	3.46822	0.0409991	103.823	2.02313	210.047	0.000102156	104.254	2.01477	2231.52	48.0437	144.776	1.37971	0.689258	6216.11	3.87402	238.012	218.446	0.404654	0.37952	2.01911	0.917796
	0.32985	0.000184065	0.000270746	0.000525994	3.83766	0.000140934	3.76098	0.0684885	84.1004	2.19391	184.508	9.33335e-05	84.7222	2.1778	2458.81	47.3769	124.627	1.76875	0.675453	8340.09	3.28391	250.988	143.962	0.440726	0.669269	1.994	0.573581
	0.363663	0.000266424	0.000123499	0.000435184	3.54663	0.000147553	4.42992	0.0620154	107.211	2.58412	277.046	9.77172e-05	107.889	2.56788	2750.02	46.388	203.578	1.89536	0.734816	12557.3	4.39424	283.417	195.133	0.432977	0.570806	2.46158	0.6885
	0.327693	0.000327892	0.00023123	0.00048408	3.33063	0.000122847	3.41758	0.0740503	88.088	1.99359	175.611	8.13555e-05	88.5798	1.98252	2241.5	48.8116	108.862	1.44719	0.619905	2910.16	2.67531	242.094	141.959	0.359969	0.298119	1.58224	0.586381
	0.310977	0.000315178	0.000238977	0.000466708	3.07321	0.00016824	4.27264	0.0233281	119.372	2.49237	297.519	0.000111417	119.94	2.48057	2871.98	47.7878	236.365	1.39982	0.794453	14748.4	5.39873	290.1	257.305	0.444178	0.531451	2.71126	0.886952
	0.31652	0.000224485	0.000238566	0.000494862	3.45398	0.000143068	3.33482	0.0429509	82.8781	1.94531	161.224	9.47467e-05	83.3755	1.93371	2223.57	47.8227	104.361	1.57271	0.647309	5193.05	3.05058	226.756	149.154	0.416911	0.494633	1.79731	0.657773
	0.359367	0.000288182	0.000214305	0.000490242	1.06742	0.000151518	4.22019	0.0536254	339.752	2.46178	836.393	0.000100343	339.948	2.46036	2637.5	48.0105	630.943	1.52294	0.754362	37585.2	7.94386	289.217	2038.03	0.428979	0.519202	2.4219	7.04672
	0.341952	0.00027878	0.000183793	0.000372163	4.11079	0.000138791	4.04283	0.0441928	84.3776	2.35832	198.989	9.19147e-05	85.0923	2.33851	2595.34	48.5887	141.751	1.42589	0.712357	6805.05	3.44902	283.775	124.848	0.408159	0.467282	2.10859	0.439955
	0.351435	0.000355809	0.000251508	0.000419657	5.02013	0.000176657	3.3218	0.0348601	56.723	1.93772	109.913	0.000116992	57.4352	1.91369	2101.74	47.2193	77.6574	1.29707	0.706534	3803.09	3.24933	220.207	70.7964	0.420807	0.381352	2.19632	0.321499
	0.392754	0.000226268	0.000102064	0.000455785	3.70515	0.000144137	4.34714	0.0464791	100.695	2.53583	255.344	9.54551e-05	101.389	2.51846	2575.25	45.8604	181.565	2.11564	0.711059	12778.3	4.05381	271.83	178.402	0.440359	0.643914	2.35832	0.656298
	0.304147	0.000337281	0.000191562	0.000401659	4.28824	0.000176341	3.78435	0.0640271	75.7033	2.20754	167.118	0.000116782	76.4003	2.1874	2568.98	46.6662	124.646	1.47578	0.745857	6778.23	4.10927	245.027	114.922	0.4369	0.459018	2.50596	0.469018
	0.304045	0.000254141	0.0001824	0.000432107	3.01547	0.000191015	3.87464	0.0465567	110.329	2.26021	249.367	0.0001265	110.835	2.2499	2630.66	46.5345	195.767	1.54679	0.785058	17078.8	5.57839	249.459	264.423	0.484582	0.678726	2.79204	1.05998
	0.373033	0.000466069	0.00014711	0.000536946	4.77834	0.000166736	3.94865	0.0540169	70.856	2.30338	163.208	0.000110421	71.6634	2.27743	2415.15	43.7161	113.144	2.16012	0.693251	4299.82	3.70184	224.362	88.6009	0.401189	0.327011	2.46698	0.394901
	0.325652	0.000280879	0.000229894	0.000448511	1.91416	0.000186419	3.20889	0.0265114	144.023	1.87186	269.589	0.000123456	144.29	1.86839	2111.02	47.1004	192.849	1.40929	0.715344	12611.6	5.40344	211.652	508.036	0.452486	0.497712	2.26282	2.40033
	0.306216	0.000293388	0.000225992	0.000428921	4.86014	0.000147134	3.22368	0.0547647	56.8688	1.88048	106.941	9.74397e-05	57.5388	1.85858	2181.87	47.9766	69.045	1.38009	0.645638	2626.06	2.55182	220.612	69.1623	0.396909	0.374104	1.77659	0.313502
	0.338982	0.000310681	0.000262038	0.000515494	3.28018	0.000110004	3.98422	0.00752315	104.276	2.32413	242.351	7.28506e-05	104.841	2.3116	2569.26	49.8597	156.808	1.42244	0.647028	4297.98	2.87518	294.483	168.323	0.355086	0.32851	1.65202	0.571588
	0.322008	0.000247774	0.000179664	0.000486213	2.38965	0.000150386	3.88776	0.0780919	139.742	2.26786	316.916	9.95931e-05	140.145	2.26133	2571.44	47.3241	225.073	1.67071	0.710198	13120.1	4.70911	258.87	377.607	0.432814	0.550876	2.20934	1.45867
[truncated: 8,392 more rows]

## Sheet: Monte_Carlo_Scroll2
	Porosity φ (-)	Median bed diameter D_50 (m)	16th percentile sediment grain size D_16 (m)	84th percentile sediment grain size D_84 (m)	Transverse bed slope α (°)	Valley slope S_v (-)	Bankfull water depth H_bf (m)	Intermittency I (-)	Bankfull width W (m)	Mean water depth H_gem (m)	Cross-sectional area A (m^2)	Channel slope S_c (-)	Wetted perimeter P (m)	Hydraulic radius R (m)	Volumetric rate of scroll bar growth SB_vol (m^3 yr^-1)	Chezy coefficient C (m^0.5 s^-1)	Bankfull discharge Q_bf (m^3 yr^-1)	Sorting σ (-)	Cross-sectional averaged flow velocity u_bf (m s^-1)	Yearly sediment transport Q_sbf (m^3 yr^-1)	Potential specific stream power ω_pv (W m^-2)	Adaptation length of flow λ_w (m)	Adaptation length of bed disturbance λ_s (m)	Magnitude of transverse slope effect f(θ) (-)	Dimensionless shear stress θ (-)	Shear stress τ (Pa)	Interaction parameter IP (-)
[truncated: 10,006 more rows]

[truncated: 4 more sheets: Monte_Carlo_Scroll3, Monte_Carlo_Scroll4, Monte_Carlo_Scroll5, Monte_Carlo_Scroll6]
