# Supplementary figures and images for: Late Holocene channel pattern change from laterally stable to meandering – a palaeohydrological reconstruction
Source: Copernicus journal article supplement (doi:10.5194/esurf-6-723-2018), 2018-08-31

Supplementary information I: Un-interpreted GPR transect of Palaeochannel X

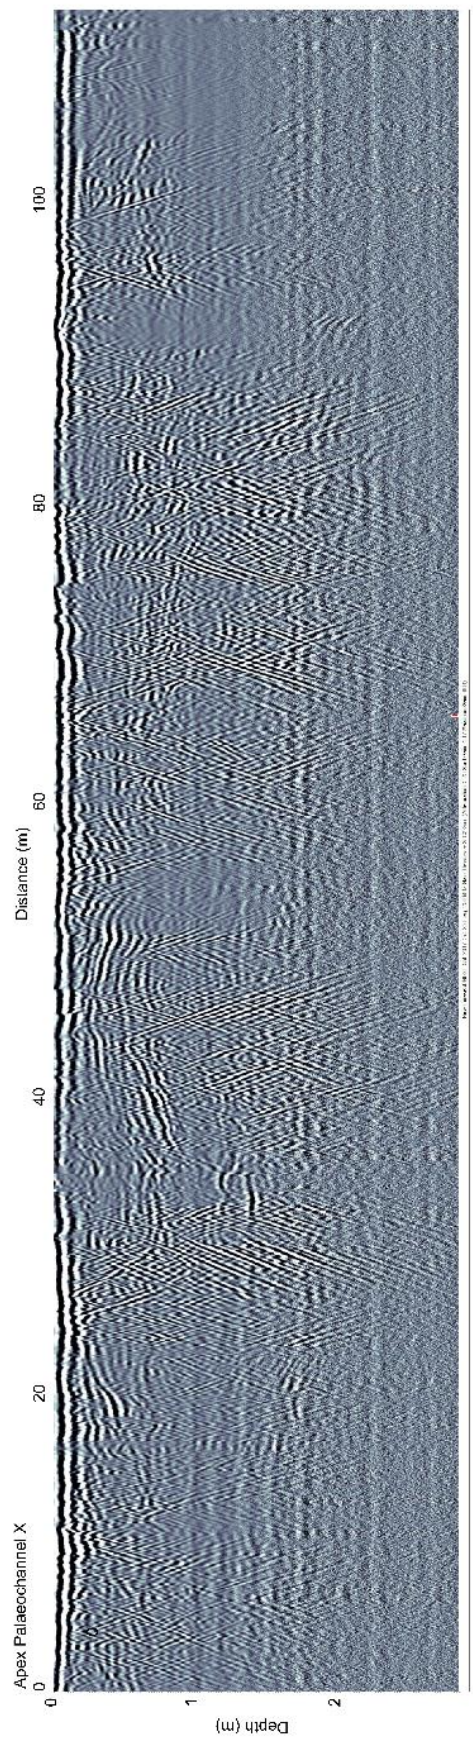

Supplement: Supplementary file 1 [file esurf-6-723-2018-supplement.zip › Supplementary information GPR transect.pdf]
